# Supplementary material
Source: bioRxiv or medRxiv preprint supplement (https://www.biorxiv.org/highwire/filestream/86260/field_highwire_adjunct_files/2/280792-3.pdf)

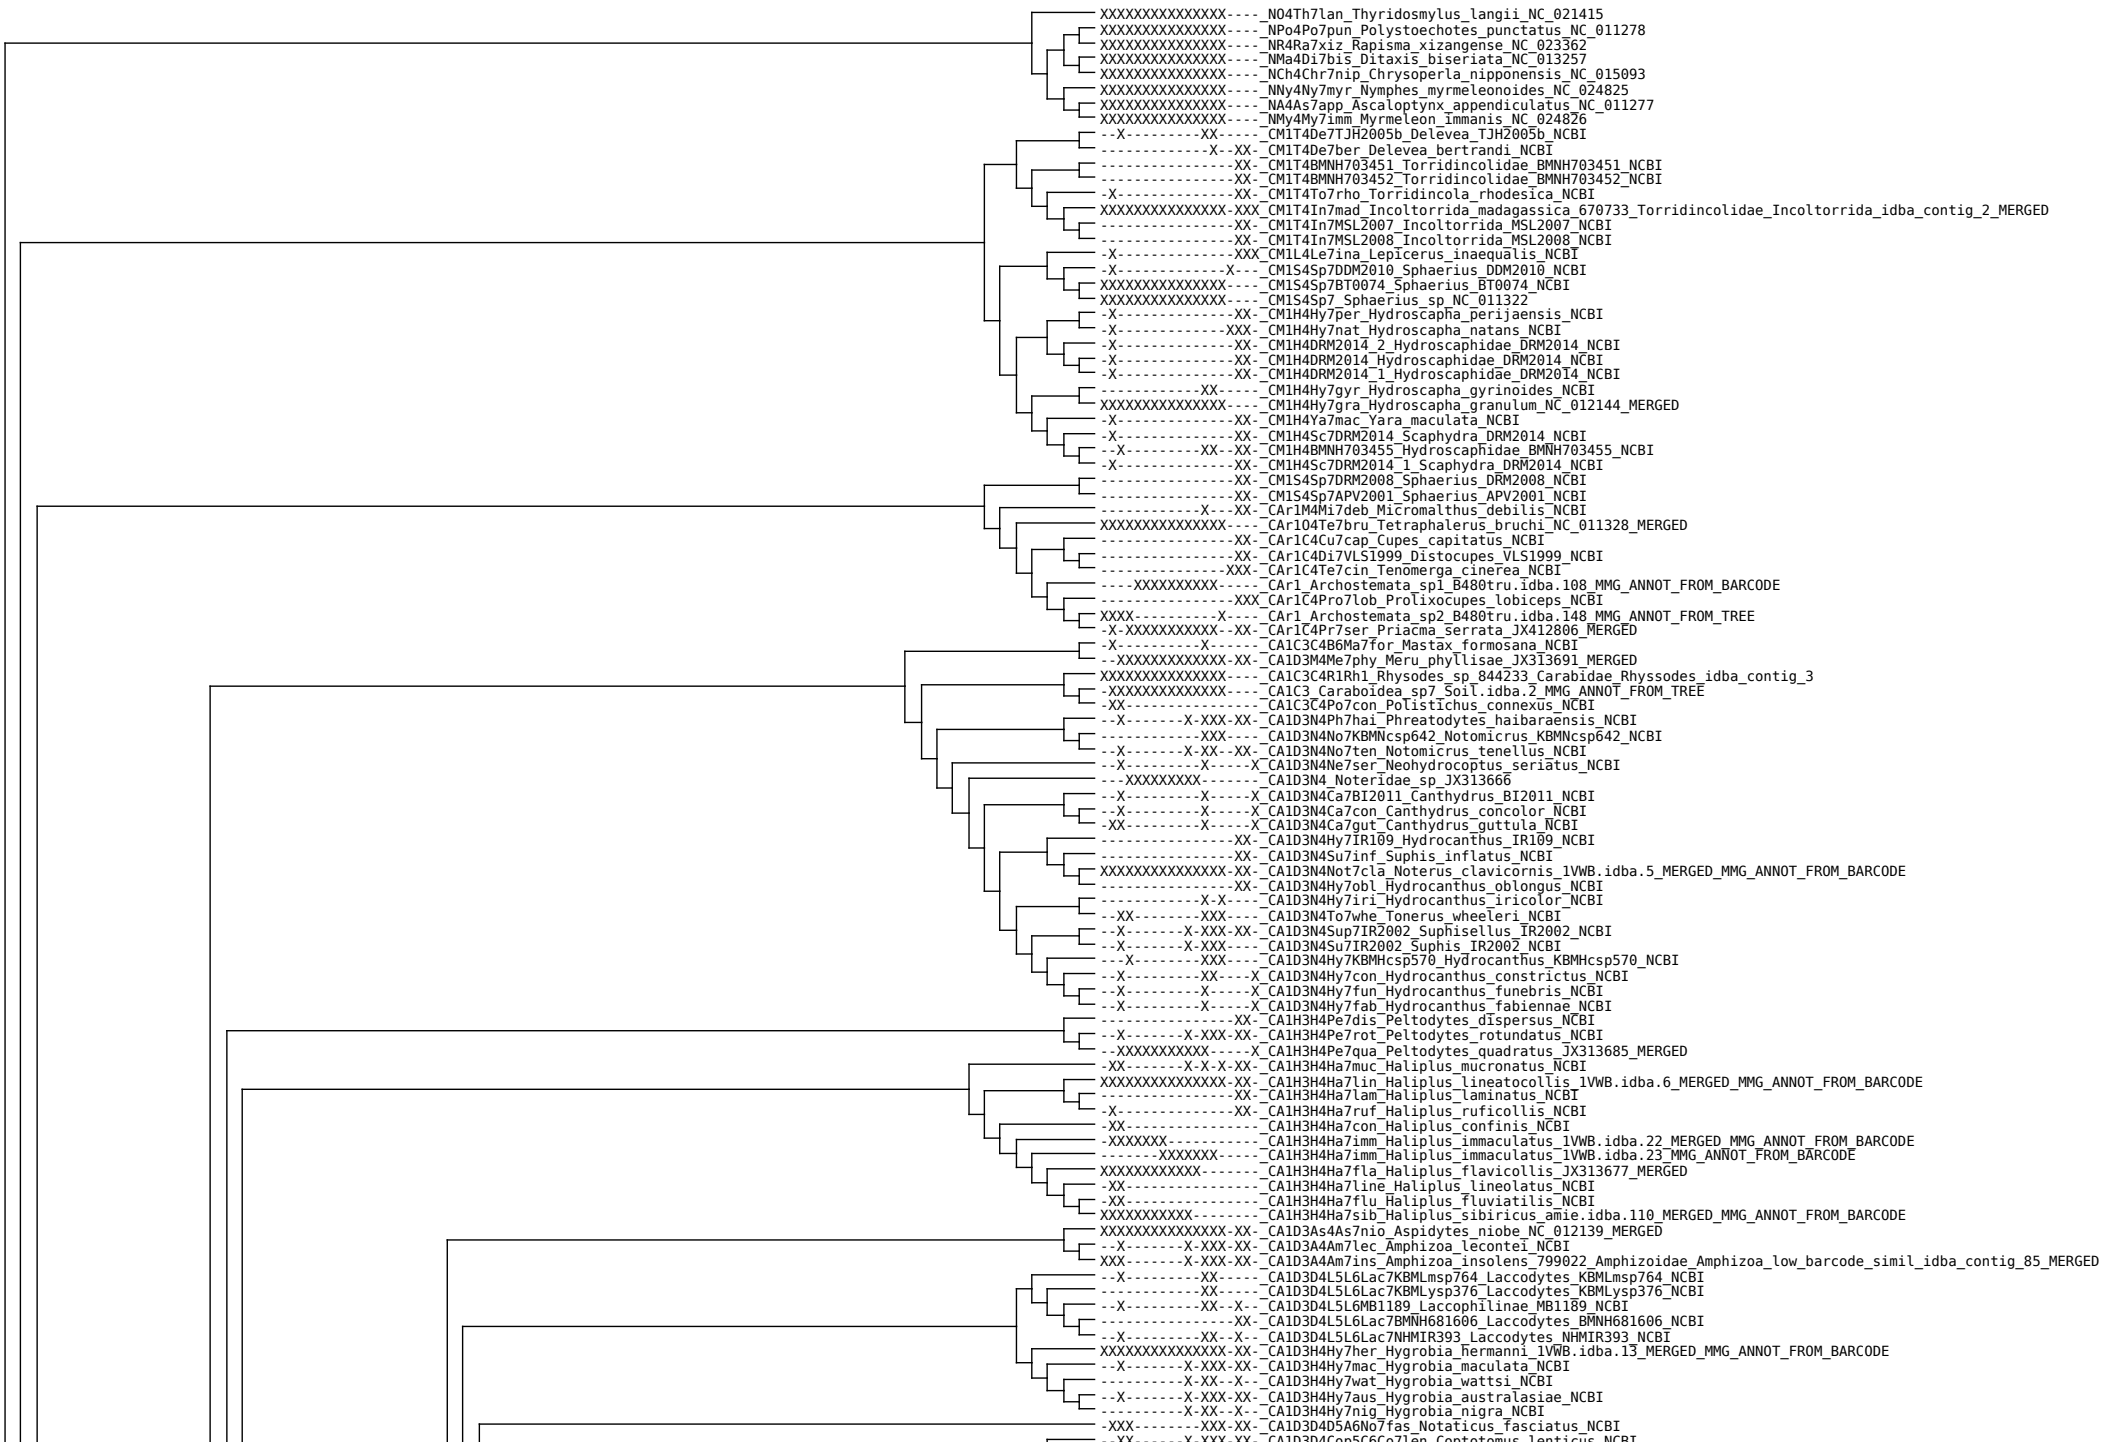

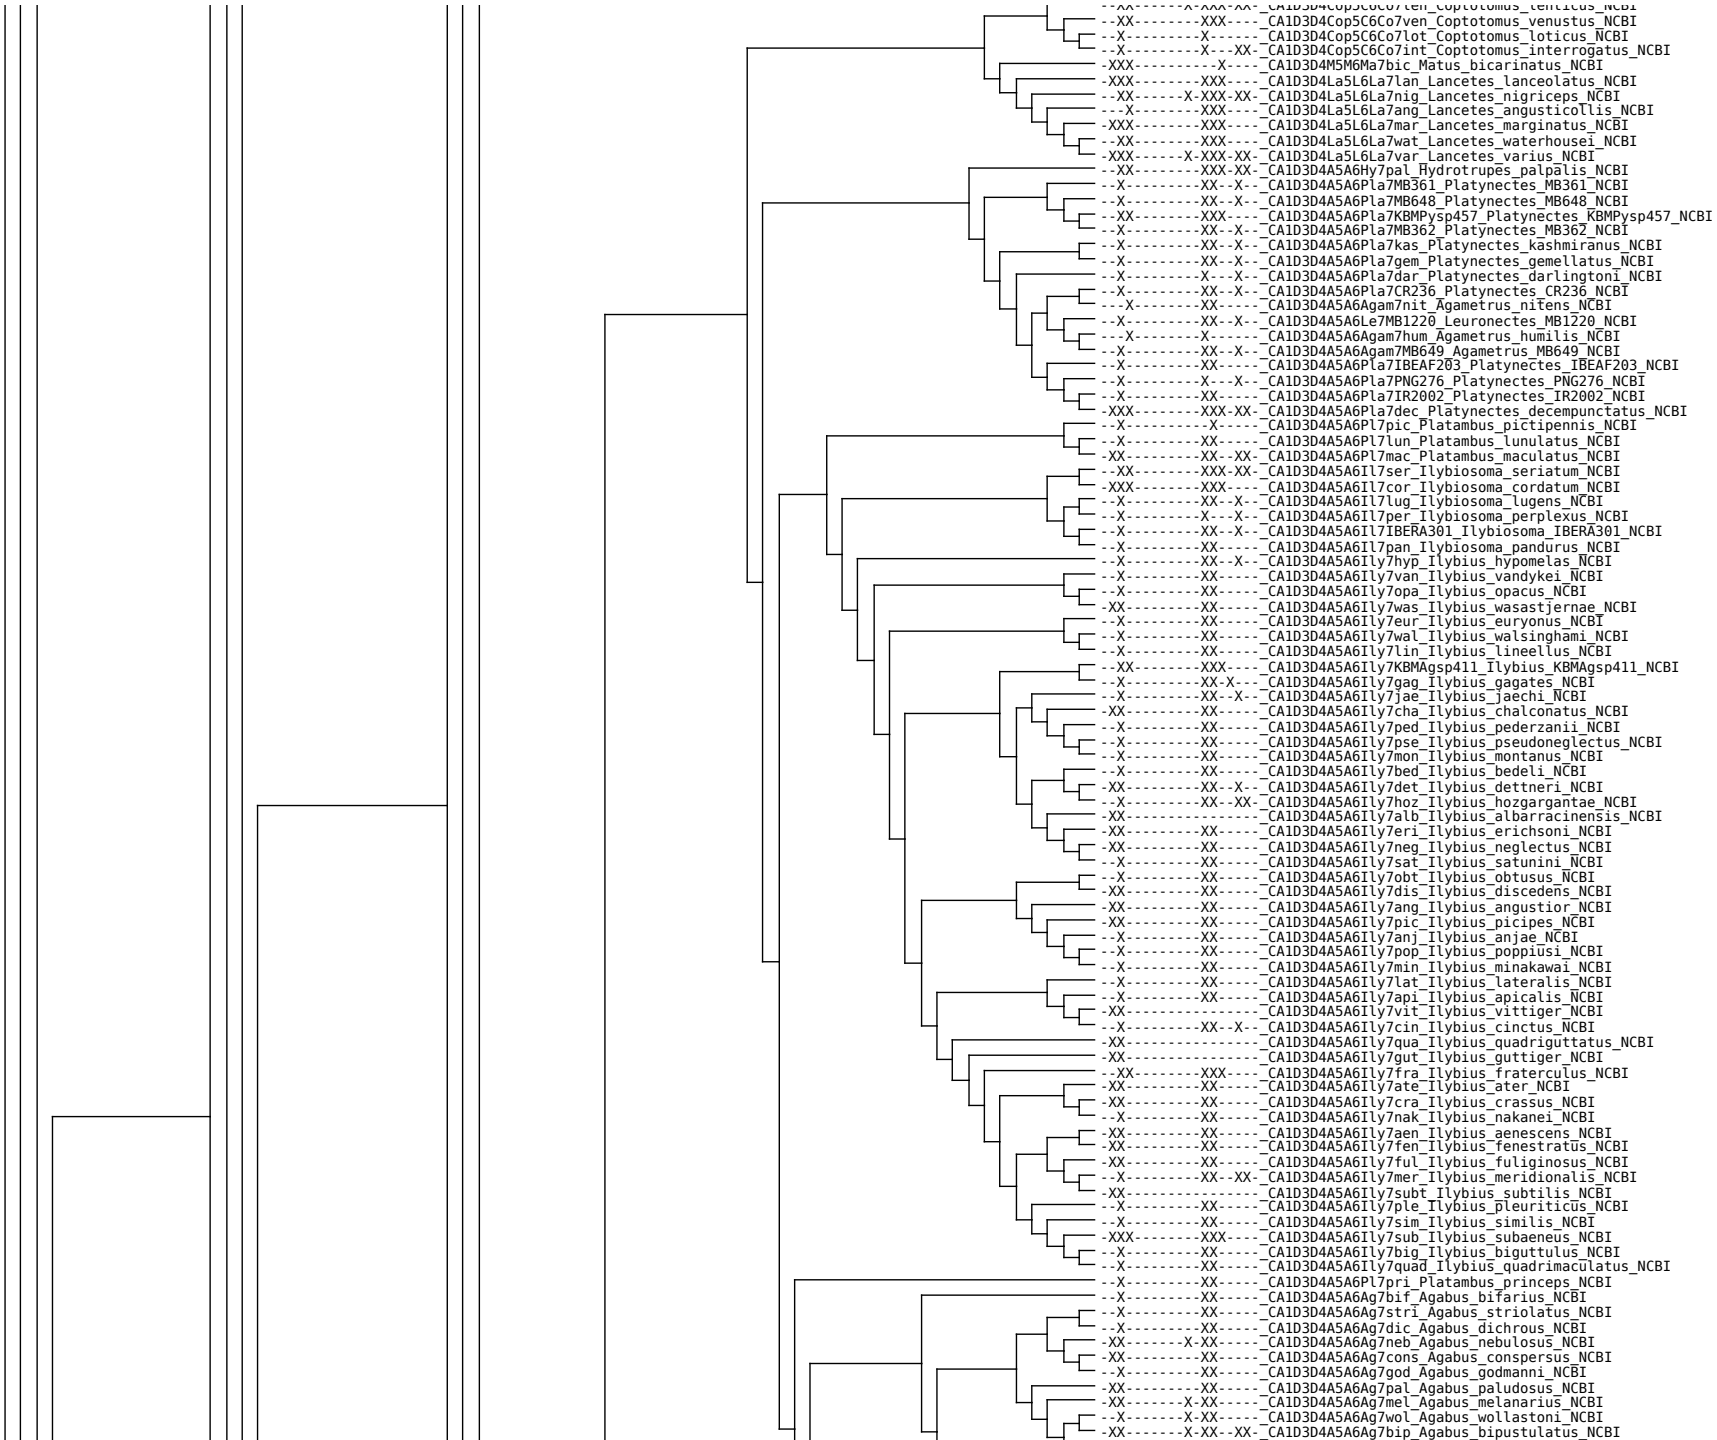

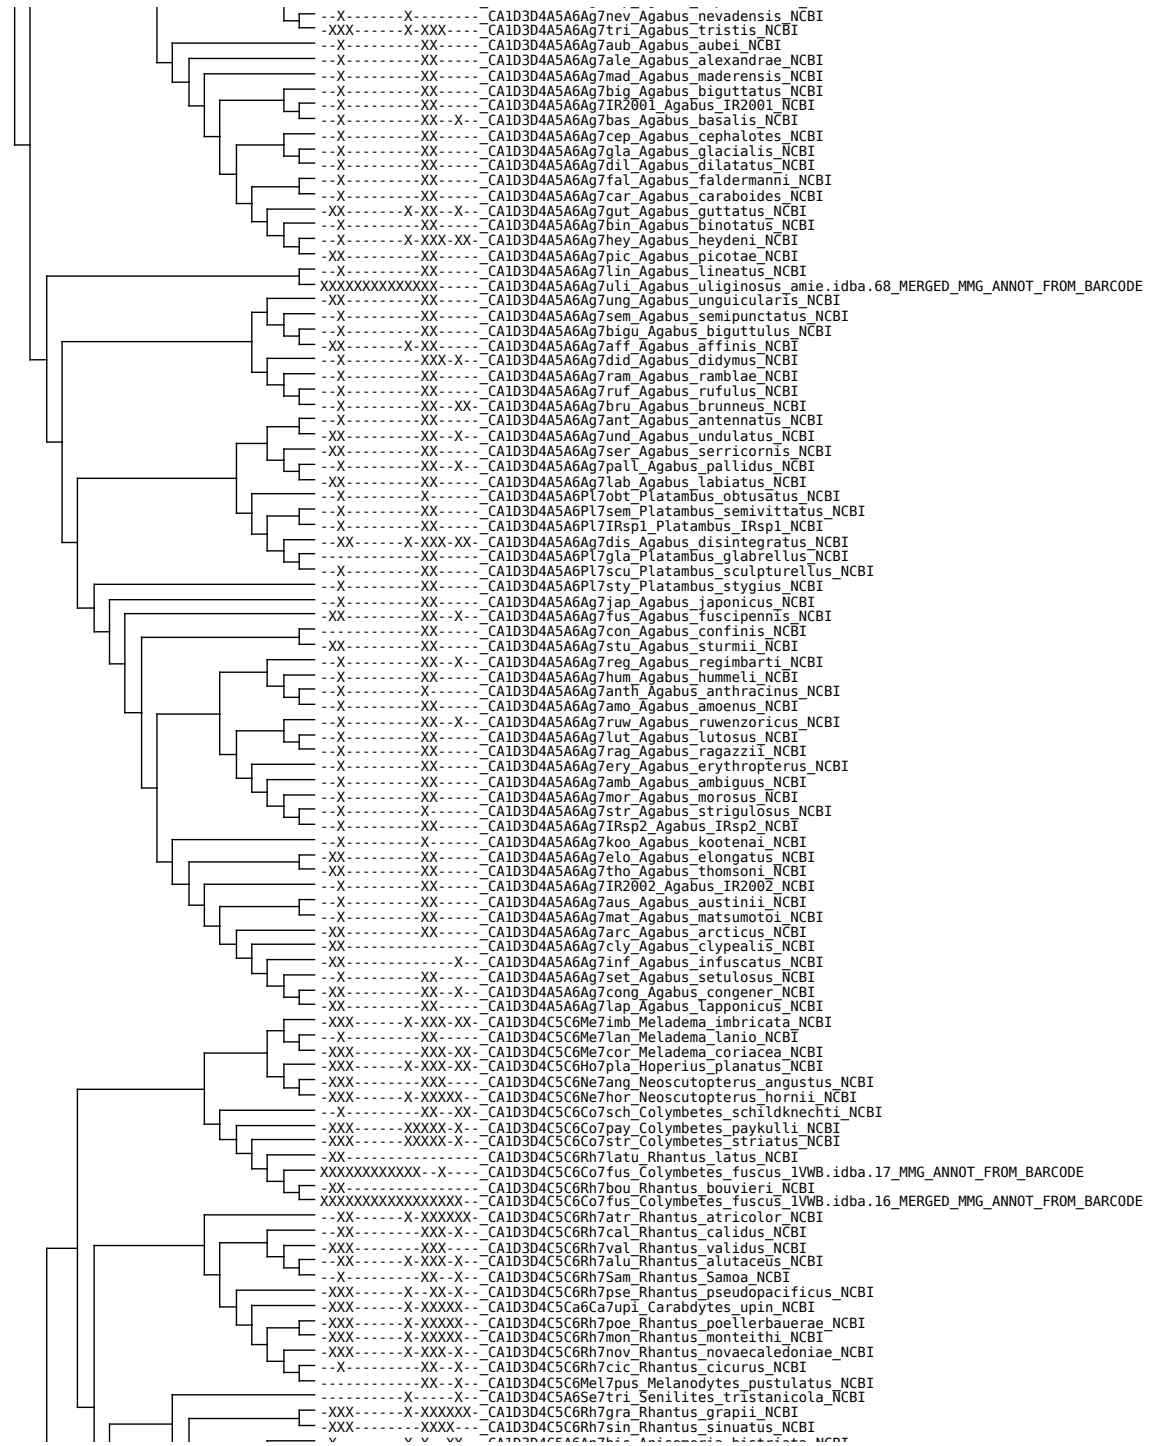

A-----X-A-XX- CA10304C5C6Rh7dis Anisomeria distriata NCBI  
-----X---XXX- CA10304C5C6Rh7boh Rhantus bohlei NCBI  
-X-X-----XXXXXX- CA10304C5C6Rh7and Rhantus andinus NCBI  
-XX-----X----- CA10304C5C6Rh7man Rhantus manjakatoempo NCBI  
-XXX-----XXX-XX- CA10304C5C6Rh7not Rhantus notaticollis NCBI  
-XXX-----X-XXX-X- CA10304C5C6Rh7lat Rhantus latitans NCBI  
-XXX-----XXXXXXX- CA10304C5C6Rh7exs Rhantus exsoletus NCBI  
-XX-----X-XXX-X- CA10304C5C6Rh7con Rhantus consputus NCBI  
-XX-----X----- CA10304C5C6Rh7inc Rhantus incognitus NCBI  
-XXX-----X-XXX- CA10304C5C6Rh7sutu Rhantus suturellus NCBI  
-XXX-----X-XXX-X- CA10304C5C6Rh7bis Rhantus bistratus NCBI  
-XX-----X-XXX-X- CA10304C5C6Rh7wal Rhantus wallisi NCBI  
-X-----X-X-XX- CA10304C5C6Rh7sig Rhantus signatus NCBI  
-----XX--X- CA10304C5C6Rh7MB1222 Rhantus MB1222 NCBI  
-XX-----XXXXXX- CA10304C5C6Rh7MB3940 Rhantus MB3940 NCBI  
-XXX-----X-XXXXXX- CA10304C5C6Rh7gut Rhantus gutticollis NCBI  
-XX-----X-XXXXXX- CA10304C5C6Rh7sou Rhantus souzannae NCBI  
-X-----X-XXXX- CA10304C5C6Rh7ani Rhantus anisonychus NCBI  
-X-----X-----X- CA10304C5C6Rh7dan Rhantus dani NCBI  
-XXX-----X-XXXXXX- CA10304C5C6Rh7bin Rhantus binotatus NCBI  
-X-----X-XX-XX- CA10304C5C6Bu7dis Bunites distigma NCBI  
-X-----X-X-XXX- CA10304C5C6Rh7pho Rhantus phocaenarum NCBI  
-XXX-----XXXXXXX- CA10304C5C6Rh7vit Rhantus vitiensis NCBI  
-XXX-----XXXXXX-X- CA10304C5C6Rh7kin Rhantus kini NCBI  
-XX-----XXXXXXX- CA10304C5C6Rh7bul Rhantus bula NCBI  
-----X-XXXX- CA10304C5C6Rh7ova Rhantus ovalis NCBI  
-XXX-----X-XXXX- CA10304C5C6Rh7sik Rhantus sikkimensis NCBI  
-XXX-----X-XXXX- CA10304C5C6Rh7che Rhantus cheesmanae NCBI  
-XXX-----XXXXXXX- CA10304C5C6Rh7ann Rhantus annectens NCBI  
-XXX-----X-XXXX- CA10304C5C6Rh7eng Rhantus englundi NCBI  
-X-----X----- CA10304C5C6Rh7eka Rhantus ekari NCBI  
-XXX-----X-XXX- CA10304C5C6Rh7sim Rhantus simulans NCBI  
-XX-----X-XXX- CA10304C5C6Rh7rie Rhantus riedeli NCBI  
-XX-----XXXXXXX- CA10304C5C6Rh7sup Rhantus supranubicus NCBI  
-XX-----XXXXXXX- CA10304C5C6Rh7ped Rhantus pederzani NCBI  
-XXX-----XXXXXXX- CA10304C5C6Rh7sut Rhantus suturalis NCBI  
-XXX-----XX-XXX- CA10304C5C6Rh7ba Rhantus bacchusi NCBI  
-XXX-----X-X- CA10304C5C6Rh7huo Rhantus huon NCBI  
-X-----X-----X- CA10304C5C6Rh7myo Rhantus myola NCBI  
-XXX-----X--X-X- CA10304C5C6Rh7eli Rhantus elisabethae NCBI  
-X-----XX-X- CA10304D5D6Dy7mar Dytiscus marginicollis NCBI  
-XXX-----XXX-X- CA10304D5D6Dy7ver Dytiscus verticalis NCBI  
-X-----XX- CA10304D5D6Dy7per Dytiscus persicus NCBI  
-X-----XX-X- CA10304D5D6Dy7lat Dytiscus latissimus NCBI  
-XX-----XX-X- CA10304D5D6Dy7dau Dytiscus dauricus NCBI  
-XXX-----XXX- CA10304D5D6Dy7marg Dytiscus marginalis NCBI  
-X-----XX- CA10304D5D6Dy7thi Dytiscus thianschanicus NCBI  
-XX-----XX- CA10304D5D6Dy7cir Dytiscus circumcinctus NCBI  
-XX-----XXXXXXX- CA10304D5D6Dy7dim Dytiscus dimidiatus NCBI  
-XX-----X----- CA10304D5D6Dy7sem Dytiscus semisulcatus NCBI  
-XXX-----XX-XXX- CA10304D5Ac6Rh7con Rhantaticus congestus NCBI  
-XX-----XXX-XX- CA10304D5E6Er7aus Eretes australis NCBI  
-XX-----X-XX-X- CA10304D5E6Er7gri Eretes griseus NCBI  
-XXX-----X-XXX- CA10304D5E6Ac7sti Eretes sticticus NCBI  
-XXX-----X-X- CA10304D5E6Ac7can Acilius canaliculatus NCBI  
-X-----XXX- CA10304D5Ac6Ae7KMAesp659 Aethionectes\_KMAesp659 NCBI  
-XX-----X-X- CA10304D5Ac6Ae7obe Aethionectes oberthueri NCBI  
-X-----X-----X- CA10304D5Ac6Ae7api Aethionectes apicalis NCBI  
-XXX-----X-X- CA10304D5Ac6Ae7ful Aethionectes fulvonotatus NCBI  
-XXX-----X-X-X- CA10304D5Ac6Ac7duv Acilius duvergeri NCBI  
XXXXXXXXXXXXXXXX-XX- CA10304D5Ac6Ac7sul Acilius sulcatus IVWB.idba.3\_MERGED\_MMG\_ANNOT\_FROM\_BARCODE  
-XXX-----X-X- CA10304D5Ac6Ac7jap Acilius japonicus NCBI  
-XXX-----X-X- CA10304D5Ac6Ac7kis Acilius kishii NCBI  
-XXX-----X-X- CA10304D5Ac6Ac7ath Acilius athabasca NCBI  
-XX-----X-XX-X- CA10304D5Ac6Ac7sem Acilius semisulcatus NCBI  
-XXX-----X-XX-X- CA10304D5Ac6Ac7abb Acilius abbreviatus NCBI  
-XXX-----X-X- CA10304D5Ac6Ac7med Acilius medius NCBI  
-XXX-----X- CA10304D5Ac6Ac7fra Acilius fraternus NCBI  
-XXX-----X-X- CA10304D5Ac6Ac7syl Acilius sylvanus NCBI  
-XXX-----X-X- CA10304D5Ac6Ac7con Acilius confusus NCBI  
-XXX-----X-XX-X- CA10304D5Ac6Gr7lib Graphoderus liberus NCBI  
-XXX-----X-X- CA10304D5Ac6Gr7fas Graphoderus fascicollis NCBI  
-XXX-----X-X- CA10304D5Ac6Gr7bie Graphoderus bieneri NCBI  
-XXX-----X-X- CA10304D5Ac6Gr7ada Graphoderus adamsii NCBI  
-XXX-----X-X- CA10304D5Ac6Gr7per Graphoderus perplexus NCBI  
-XXX-----X-X- CA10304D5Ac6Gr7bil Graphoderus bilineatus NCBI  
-XXX-----X-X- CA10304D5Ac6Gr7zon Graphoderus zonatus NCBI  
-XXX-----X-X- CA10304D5Ac6Gr7aus Graphoderus austriacus NCBI  
-XXX-----X-X- CA10304D5Ac6Gr7occ Graphoderus occidentalis NCBI  
-XXX-----X-X- CA10304D5Ac6Ti7ere Tikoloshane5\_eretiformis NCBI  
-XXX-----X-X- CA10304D5Ac6Sa7mix Sandracottus mixtus NCBI  
-XXX-----XXX-X- CA10304D5Ac6Sa7dej Sandracottus dejeanii NCBI  
-XXX-----X-X- CA10304D5Ac6Sa7ins Sandracottus insignis NCBI  
-XXX-----XXX-X- CA10304D5Ac6Sa7bak Sandracottus bakewellii NCBI  
-XX-----X----- CA10304D5Ac6Sa7gue Sandracottus guerini NCBI  
-XXX-----X-X- CA10304D5Ac6Th7marg Thermonectus margineguttatus NCBI  
-XXX-----X-X- CA10304D5Ac6Th7var Thermonectus variegatus NCBI  
-XXX-----X-X- CA10304D5Ac6Th7mar Thermonectus marmoratus NCBI  
-XX-----X-X- CA10304D5Ac6Th7alf Thermonectus alfredi NCBI  
-XXX-----X-X- CA10304D5Ac6Th7lep Thermonectus leprieurii NCBI  
-XXX-----X-X- CA10304D5Ac6Th7nob Thermonectus nobilis NCBI  
-XXX-----X-XX-X- CA10304D5Ac6Th7nig Thermonectus nigrofasciatus NCBI  
-XX-----X-X- CA10304D5Ac6Th7cir Thermonectus circumscriptus NCBI  
-XXX-----X-X- CA10304D5Ac6Th7int Thermonectus intermedius NCBI  
-XXX-----X-X- CA10304D5Ac6Th7bas Thermonectus basillaris NCBI  
-XXX-----X-----X- CA10304D5Ac6Th7suc Thermonectus succinctus NCBI



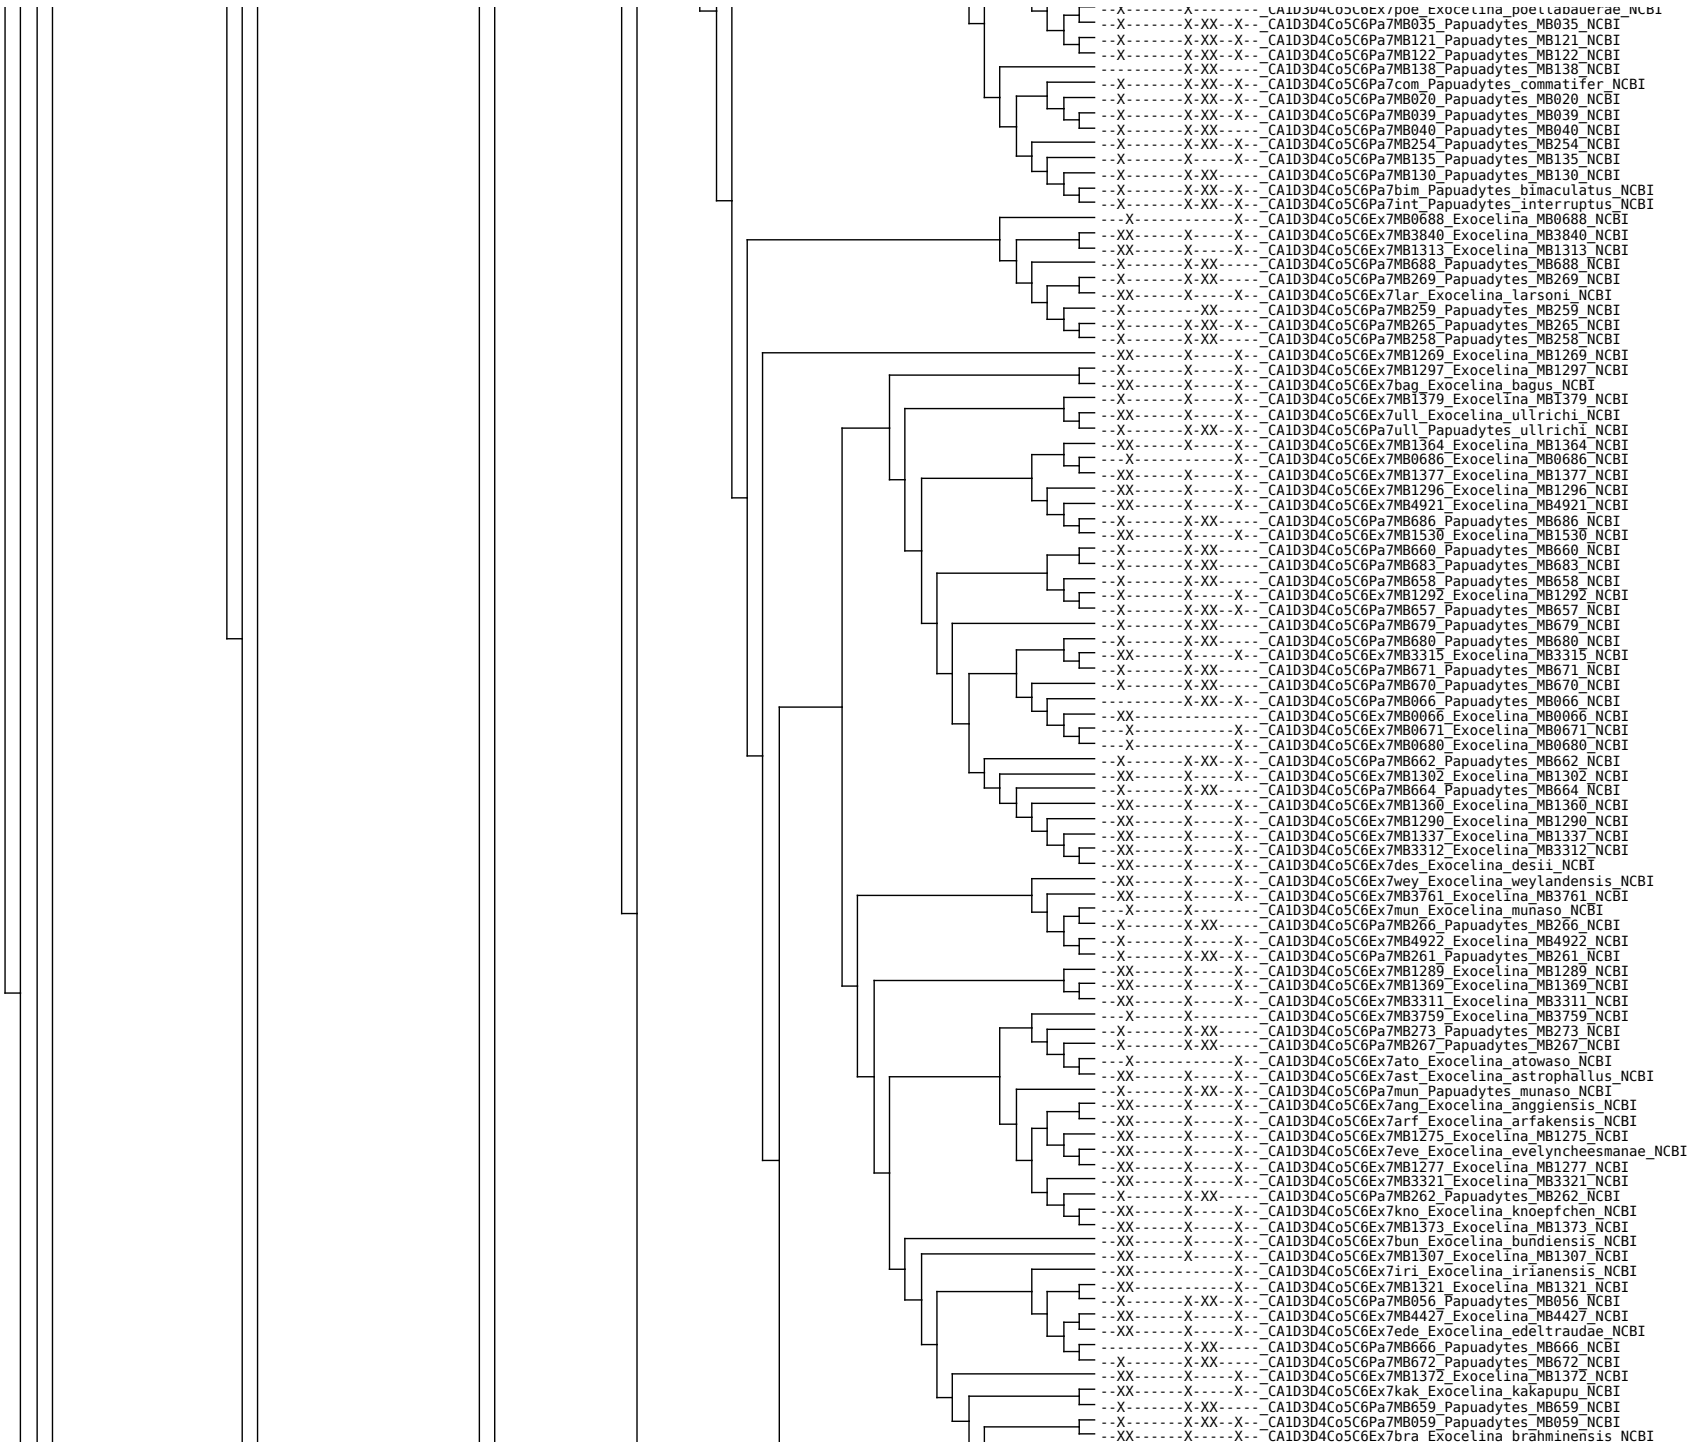

--XX-----X-----X--CA103D4Co5C6Ex7sop\_Exocelina\_soppi NCBI  
--XX-----X-----X--CA103D4Co5C6Ex7uto\_Exocelina\_utowaensis NCBI  
--XX-----X-----X--CA103D4Co5C6Ex7MB0060\_Exocelina\_MB0060 NCBI  
--XX-----X-----X--CA103D4Co5C6Ex7MB4916\_Exocelina\_MB4916 NCBI  
--XX-----X-----X--CA103D4Co5C6Ex7MB1295\_Exocelina\_MB1295 NCBI  
--X-----X-XXX-XX-CA103D4Co5C6Pa7IR073\_Papudytes\_IR073 NCBI  
--XX-----X-----X--CA103D4Co5C6Ex7uni\_Exocelina\_unipo NCBI  
--XX-----X-----X--CA103D4Co5C6Ex7MB3330\_Exocelina\_MB3330 NCBI  
--XX-----X-----X--CA103D4Co5C6Ex7MB3405\_Exocelina\_MB3405 NCBI  
--XX-----X-----X--CA103D4Co5C6Ex7aap\_Exocelina\_aipomek NCBI  
--X-----X-XX-CA103D4Co5C6Pa7MB257\_Papudytes\_MB257 NCBI  
--XX-----X-----X--CA103D4Co5C6Ex7MB3408\_Exocelina\_MB3408 NCBI  
--X-----X-----X--CA103D4Co5C6Ex7MB0257\_Exocelina\_MB0257 NCBI  
--XX-----X-----X--CA103D4Co5C6Ex7MB1383\_Exocelina\_MB1383 NCBI  
--X-----X-XX-CA103D4Co5C6Pa7MB263\_Papudytes\_MB263 NCBI  
--XX-----X-----X--CA103D4Co5C6Ex7MB1520\_Exocelina\_MB1520 NCBI  
--XX-----X-----X--CA103D4Co5C6Ex7mar\_Exocelina\_marinae NCBI  
--XX-----X-----X--CA103D4Co5C6Ex7MB1287\_Exocelina\_MB1287 NCBI  
--XX-----X-----X--CA103D4Co5C6Ex7hin\_Exocelina\_hintelmannae NCBI  
--X-----X-XX-CA103D4Co5C6Pa7MB256\_Papudytes\_MB256 NCBI  
--X-----X-XX-CA103D4Co5C6Pa7hin\_Papudytes\_hintelmannae NCBI  
--XX-----X-----X--CA103D4Co5C6Ex7MB3303\_Exocelina\_MB3303 NCBI  
--XX-----X-----X--CA103D4Co5C6Ex7MB1361\_Exocelina\_MB1361 NCBI  
--XX-----X-----X--CA103D4Co5C6Ex7MB3399\_Exocelina\_MB3399 NCBI  
--XX-----X-----X--CA103D4Co5C6Ex7MB3404\_Exocelina\_MB3404 NCBI  
--X-----X-XX-CA103D4Co5C6Pa7MB667\_Papudytes\_MB667 NCBI  
--XX-----X-----X--CA103D4Co5C6Ex7MB1376\_Exocelina\_MB1376 NCBI  
--XX-----X-----X--CA103D4Co5C6Ex7MB1285\_Exocelina\_MB1285 NCBI  
--XX-----X-----X--CA103D4Co5C6Ex7pat\_Exocelina\_patepensis NCBI  
--XX-----X-----X--CA103D4Co5C6Ex7dam\_Exocelina\_damantiensis NCBI  
--XX-----X-----X--CA103D4Co5C6Ex7MB1366\_Exocelina\_MB1366 NCBI  
--XX-----X-----X--CA103D4Co5C6Ex7MB3406\_Exocelina\_MB3406 NCBI  
--XX-----X-----X--CA103D4Co5C6Ex7mon\_Exocelina\_monae NCBI  
--XX-----X-----X--CA103D4Co5C6Ex7MB1375\_Exocelina\_MB1375 NCBI  
--XX-----X-----X--CA103D4Co5C6Ex7mir\_Exocelina\_miriae NCBI  
--XX-----X-----X--CA103D4Co5C6Ex7MB0673\_Exocelina\_MB0673 NCBI  
--XX-----X-----X--CA103D4Co5C6Ex7MB3876\_Exocelina\_MB3876 NCBI  
--X-----X-XX-CA103D4Co5C6Pa7MB268\_Papudytes\_MB268 NCBI  
--X-----X-XX-CA103D4Co5C6Pa7MB656\_Papudytes\_MB656 NCBI  
--X-----X-XX-CA103D4Co5C6Pa7MB685\_Papudytes\_MB685 NCBI  
--XX-----X-----X--CA103D4Co5C6Ex7MB3409\_Exocelina\_MB3409 NCBI  
--XX-----X-----X--CA103D4Co5C6Ex7jas\_Exocelina\_jaseminae NCBI  
--X-----X-XX-CA103D4Co5C6Pa7mir\_Papudytes\_miriae NCBI  
--XX-----X-XX-CA103D4Co5C6Li7atr\_Liopteris\_atriceps NCBI  
--X-----X-XXX-CA103D4Co5C6Co7aru\_Copelatus\_aruensis NCBI  
XXXXXXXXXXXXXXXX-CA103D4Co5C6Li7hae\_Liopteris\_haemorrhoidalis\_1VWB\_idba.11\_MERGED\_MMG\_ANNOT\_FROM\_BARCODE  
--X-----X-CA103D4Co5C6Ma7MTM2009\_9\_Madaglymbus\_MTM2009 NCBI  
--X-----X-CA103D4Co5C6Ma7MTM2009\_3\_Madaglymbus\_MTM2009 NCBI  
--X-----X-CA103D4Co5C6Ma7MTM2009\_2\_Madaglymbus\_MTM2009 NCBI  
--X-----X-CA103D4Co5C6Ma7MTM2009\_4\_Madaglymbus\_MTM2009 NCBI  
--X-----X-CA103D4Co5C6Ma7MTM2009\_Madaglymbus\_MTM2009 NCBI  
--X-----X-CA103D4Co5C6Ma7MTM2009\_1\_Madaglymbus\_MTM2009 NCBI  
--X-----X-CA103D4Co5C6Ma7MTM2009\_11\_Madaglymbus\_MTM2009 NCBI  
--X-----X-CA103D4Co5C6Ma7MTM2009\_10\_Madaglymbus\_MTM2009 NCBI  
--X-----X-CA103D4Co5C6Ma7MTM2009\_7\_Madaglymbus\_MTM2009 NCBI  
--X-----X-CA103D4H5B6I2011\_Hydroporinae\_BI2011 NCBI  
--X-----X-CA103D4Co5C6Ma7MTM2009\_6\_Madaglymbus\_MTM2009 NCBI  
--X-----X-CA103D4Co5C6Ma7MTM2009\_5\_Madaglymbus\_MTM2009 NCBI  
--XX-----XXX-CA103D4Co5C6Aga7sil\_Agaporomorphus\_silvaticus NCBI  
--XX-----X-X-CA103D4Co5C6Aga7tam\_Agaporomorphus\_tambopatenensis NCBI  
--XX-----X-XX-CA103D4Co5C6Aga7kni\_Agaporomorphus\_knischii NCBI  
--X-----X-XX-CA103D4Co5C6Aga7MB009\_Aglymbus\_MB009 NCBI  
--X-----X-XX-CA103D4Co5C6Aga7BI2011\_Madaglymbus\_BI2011 NCBI  
--X-----X-XX-CA103D4Co5C6Aga7elo\_Aglymbus\_elongatus NCBI  
--X-----X-CA103D4Co5C6Aga7MB2014\_Madaglymbus\_MB2014 NCBI  
--XX-----X-XX-CA103D4Co5C6Aga7rut\_Madaglymbus\_ruthwiidae NCBI  
--X-----X-CA103D4Co5C6Aga7BM2008\_Aglymbus\_BM2008 NCBI  
--X-----XX-CA103D4Co5C6Aga7pil\_Aglymbus\_pilatus NCBI  
--X-----X-CA103D4Co5C6Aga7MB2014\_1\_Aglymbus\_MB2014 NCBI  
--X-----X-CA103D4Co5C6Aga7lep\_Aglymbus\_leprieurii NCBI  
--X-----X-CA103D4Co5C6Aga7MB2014\_Aglymbus\_MB2014 NCBI  
--X-----X-XX-CA103D4Co5C6Aga7MB321\_Aglymbus\_MB321 NCBI  
--X-----X-XX-CA103D4Co5C6Aga7MB322\_Aglymbus\_MB322 NCBI  
--X-----XX-CA103D4Co5C6La7ER9\_Lacconectus\_ER9 NCBI  
--XX-----CA103D4Co5C6La7sab\_Lacconectus\_sabahensis NCBI  
--X-----XX-CA103D4Co5C6La7693509\_Lacconectus\_693509 NCBI  
--XX-----X-X-CA103D4Co5C6La7reg\_Lacconectus\_regimbarti NCBI  
--X-----X-X-CA103D4Co5C6La7and\_Lacconectus\_andrewesi NCBI  
--X-----X-XX-CA103D4Co5C6La7MB043\_Lacconectus\_MB043 NCBI  
--X-----X-XX-CA103D4Co5C6La7kri\_Lacconectus\_krikkeni NCBI  
--XXX-CA103D4JH2010\_Dytiscidae\_JH2010 NCBI  
--X-----X-X-CA103D4Co5C6La7atl\_Lacconectus\_atlas NCBI  
--X-----X-XX-CA103D4Co5C6La7peg\_Lacconectus\_peguensis NCBI  
--XX-----X-X-CA103D4Co5C6Aga7bro\_Aglymbus\_bromeliarum NCBI  
--X-----X-X-CA103D4Co5C6Co7abo\_Copelatus\_abonmenci NCBI  
--X-----X-X-CA103D4Co5C6Co7647\_Copelatus\_647 NCBI  
--X-----XX-X-CA103D4Co5C6Co78\_Copelatus\_8 NCBI  
--X-----X-X-CA103D4Co5C6Co7327\_Copelatus\_327 NCBI  
--X-----X-X-CA103D4Co5C6Co7con\_Copelatus\_concolorans NCBI  
--X-----X-X-CA103D4Co5C6Co7311\_Copelatus\_311 NCBI  
--X-----X-X-CA103D4Co5C6Co7BM2008\_4\_Copelatus\_BM2008 NCBI  
--X-----X-X-CA103D4Co5C6Aga7bim\_Aglymbus\_bimaculatus NCBI  
--X-----X-X-CA103D4Co5C6Co7754\_Copelatus\_754 NCBI  
--XX-----X-X-CA103D4Co5C6Co7ten\_Copelatus\_tenebrosus NCBI  
--X-----X-X-CA103D4Co5C6Co7757\_Copelatus\_757 NCBI  
--X-----X-X-CA103D4Co5C6Co7758\_Copelatus\_758 NCBI





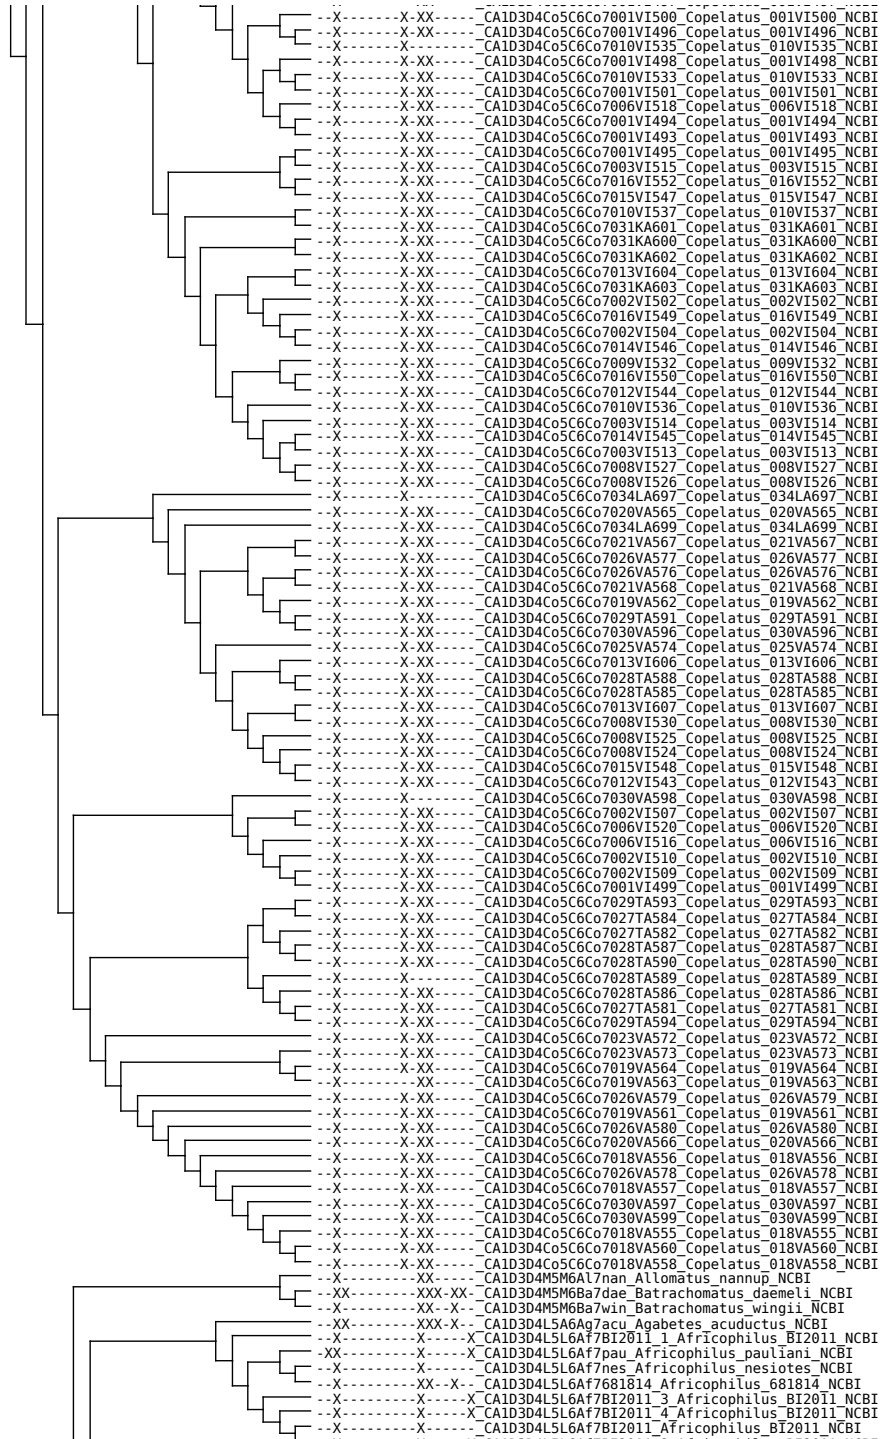

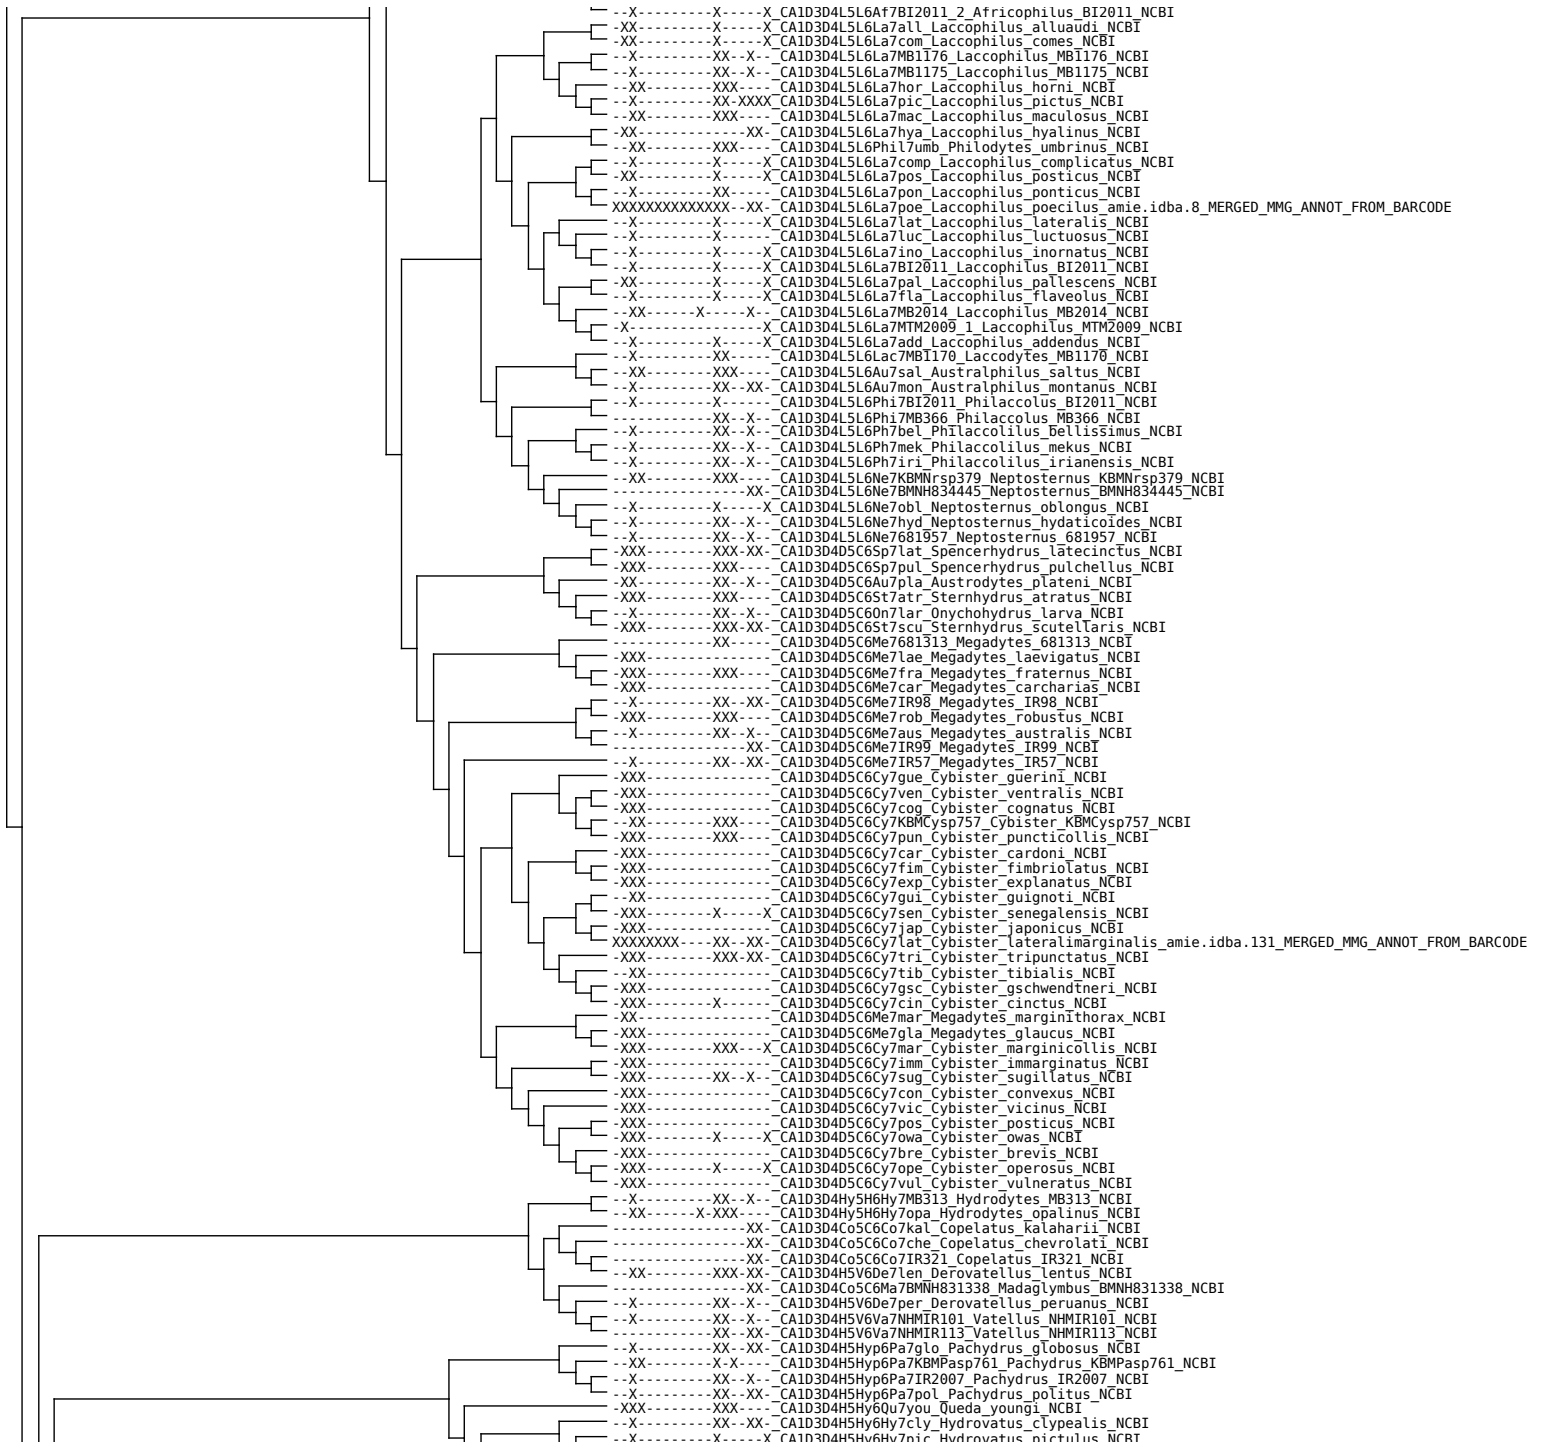

CA1D3D4H5Hy6Hy7dav\_Hydrovatus\_davidis\_NCBI  
CA1D3D4H5Hy6Hy7pus\_Hydrovatus\_pustulatus\_NCBI  
CA1D3D4H5Hy6Hy7tes\_Hydrovatus\_testudinaris\_NCBI  
CA1D3D4H5Hy6Hy7oti\_Hydrovatus\_otiosus\_NCBI  
CA1D3D4H5Hy6Hy7par\_Hydrovatus\_parvulus\_NCBI  
CA1D3D4H5Hy6Hy7acu\_Hydrovatus\_acuminatus\_NCBI  
CA1D3D4H5Hy6Hy7para\_Hydrovatus\_parallelipennis\_NCBI  
CA1D3D4H5Hy6Hy7fra\_Hydrovatus\_fratr NCBI  
CA1D3D4H5Hy6Hy7nig\_Hydrovatus\_nigrita\_NCBI  
CA1D3D4H5Hy6Hy7ruf\_Hydrovatus\_rufoniger\_NCBI  
CA1D3D4H5Hy6Hy7obl\_Hydrovatus\_oblongipennis\_NCBI  
CA1D3D4H5Hy6Hy7nigr\_Hydrovatus\_nigricans\_NCBI  
CA1D3D4H5L6La7obl\_Laccornis\_oblongus\_NCBI  
CA1D3D4H5L6La7koc\_Laccornis\_kocae\_NCBI  
CA1D3D4H5L6La7dif\_Laccornis\_difformis\_NCBI  
CA1D3D4H5H6La7lug\_Laccornellus\_lugubris\_NCBI  
CA1D3D4H5H6La7cop\_Laccornellus\_copelatoides\_NCBI  
CA1D3D4H5H6An7got\_Antiporus\_gottwaldi\_NCBI  
CA1D3D4H5H6Sa7ter\_Sanfilippodytes\_terminalis\_NCBI  
CA1D3D4H5H6Neo7VLS1999\_Neoporus\_VLS1999\_NCBI  
CA1D3D4H5H6Sa7IR2002\_Sanfilippodytes\_IR2002\_NCBI  
CA1D3D4H5H6Sa7KBM2014\_Sanfilippodytes\_KBM2014\_NCBI  
CA1D3D4H5H6Neo7mel\_Neoporus\_mellitus\_NCBI  
CA1D3D4H5H6Ha7tex\_Haideoporus\_texanus\_NCBI  
CA1D3D4H5H6He7pul\_Heterosternuta\_pulcher\_NCBI  
CA1D3D4H5H6Neo7und\_Neoporus\_undulatus\_NCBI  
CA1D3D4H5H6Neo7sol\_Neoporus\_solitarius\_NCBI  
CA1D3D4H5H6Neo7ari\_Neoporus\_arizonicus\_NCBI  
CA1D3D4H5H6Hyd7pau\_Hydrocolus\_paugus\_NCBI  
CA1D3D4H5H6Hyd7sah\_Hydrocolus\_sahlbergi\_NCBI  
CA1D3D4H5H6Hyd7pic\_Hydrocolus\_picicornis\_NCBI  
CA1D3D4H5H6Su7fig\_Suphrodytes\_figuratus\_NCBI  
CA1D3D4H5H6Su7dor\_Suphrodytes\_dorsalis\_NCBI  
CA1D3D4H5H6Hy7sub\_Hydroporus\_submuticus\_NCBI  
CA1D3D4H5H6Hy7ruf\_Hydroporus\_rufifrons\_NCBI  
CA1D3D4H5H6Hy7ves\_Hydroporus\_vespertinus\_NCBI  
CA1D3D4H5H6Hy7ery\_Hydroporus\_erythrocephalus\_1VWB.idba.20\_MERGED\_MMG\_ANNOT\_FROM\_BARCODE  
CA1D3D4H5H6Hy7IRC37\_Hydroporus\_IRC37\_NCBI  
CA1D3D4H5H6Hy7tran\_Hydroporus\_transpunctatus\_NCBI  
CA1D3D4H5H6Hy7elo\_Hydroporus\_elongatulus\_NCBI  
CA1D3D4H5H6Hy7obs\_Hydroporus\_obscurus\_1VWB.idba.1\_MERGED\_MMG\_ANNOT\_FROM\_BARCODE  
CA1D3D4H5H6Hy7pag\_Hydroporus\_paganettianus\_NCBI  
CA1D3D4H5H6Hy7lap\_Hydroporus\_lapponum\_NCBI  
CA1D3D4H5H6Hy7for\_Hydroporus\_fortis\_NCBI  
CA1D3D4H5H6Hy7axi\_Hydroporus\_axillaris\_NCBI  
CA1D3D4H5H6Hy7IRC36\_Hydroporus\_IRC36\_NCBI  
CA1D3D4H5H6Hy7nig\_Hydroporus\_niger\_NCBI  
CA1D3D4H5H6Hy7sin\_Hydroporus\_sinuatipes\_NCBI  
CA1D3D4H5H6Hy7not\_Hydroporus\_notabilis\_NCBI  
CA1D3D4H5H6Hy7mor\_Hydroporus\_morio\_NCBI  
CA1D3D4H5H6Hy7sem\_Hydroporus\_semenowi\_NCBI  
CA1D3D4H5H6Hy7gen\_Hydroporus\_geniculatus\_NCBI  
CA1D3D4H5H6Hy7nige\_Hydroporus\_nigellus\_NCBI  
CA1D3D4H5H6Hy7subp\_Hydroporus\_subpubescens\_NCBI  
CA1D3D4H5H6Hy7IR325\_Hydroporus\_IR325\_NCBI  
CA1D3D4H5H6Hy7des\_Hydroporus\_despectus\_NCBI  
CA1D3D4H5H6Hy7car\_Hydroporus\_carri\_NCBI  
CA1D3D4H5H6Hy7hir\_Hydroporus\_hirtellus\_NCBI  
CA1D3D4H5H6Hy7IR232\_Hydroporus\_IR232\_NCBI  
CA1D3D4H5H6Hy7per\_Hydroporus\_pervicinus\_NCBI  
CA1D3D4H5H6Hy7IR334\_Hydroporus\_IR334\_NCBI  
CA1D3D4H5H6Hy7occ\_Hydroporus\_occidentalis\_NCBI  
CA1D3D4H5H6Hy7app\_Hydroporus\_appalachius\_NCBI  
CA1D3D4H5H6Hy7man\_Hydroporus\_mannerheimi\_NCBI  
CA1D3D4H5H6Hy7neg\_Hydroporus\_neglectus\_NCBI  
CA1D3D4H5H6Hy7sca\_Hydroporus\_scalesianus\_NCBI  
CA1D3D4H5H6Hy7ang\_Hydroporus\_angustatus\_NCBI  
CA1D3D4H5H6Hy7pube\_Hydroporus\_puberulus\_NCBI  
CA1D3D4H5H6Hy7gla\_Hydroporus\_glabriusculus\_NCBI  
CA1D3D4H5H6Hy7mo\_Hydroporus\_umbrosus\_NCBI  
CA1D3D4H5H6Hy7bre\_Hydroporus\_brevis\_NCBI  
CA1D3D4H5H6Hy7mar\_Hydroporus\_marginatus\_NCBI  
CA1D3D4H5H6Hy7fus\_Hydroporus\_fuscipennis\_NCBI  
CA1D3D4H5H6Hy7acu\_Hydroporus\_acutangulus\_NCBI  
CA1D3D4H5H6Hy7kab\_Hydroporus\_kabakovi\_NCBI  
CA1D3D4H5H6Hy7pla\_Hydroporus\_planus\_1VWB.idba.2\_MERGED\_MMG\_ANNOT\_FROM\_BARCODE  
CA1D3D4H5H6Hy7gol\_Hydroporus\_goldschmidti\_NCBI  
CA1D3D4H5H6Hy7luc\_Hydroporus\_lucasi\_NCBI  
CA1D3D4H5H6Hy7lim\_Hydroporus\_limbatulus\_NCBI  
CA1D3D4H5H6Hy7pil\_Hydroporus\_pilosus\_NCBI  
CA1D3D4H5H6Hy7com\_Hydroporus\_compunctus\_NCBI  
CA1D3D4H5H6Hy7ana\_Hydroporus\_analis\_NCBI  
CA1D3D4H5H6Hy7dec\_Hydroporus\_decipiens\_NCBI  
CA1D3D4H5H6Hy7dis\_Hydroporus\_discretus\_1VWB.idba.14\_MERGED\_MMG\_ANNOT\_FROM\_BARCODE  
CA1D3D4H5H6Hy7err\_Hydroporus\_errans\_NCBI  
CA1D3D4H5H6Hy7bran\_Hydroporus\_brancuccii\_NCBI  
CA1D3D4H5H6Hy7mac\_Hydroporus\_macedonicus\_NCBI  
CA1D3D4H5H6Hy7Hyd7porus\_spt\_1VWB.idba.19\_MMG\_ANNOT\_FROM\_BARCODE  
CA1D3D4H5H6Hy7zim\_Hydroporus\_zimmermanni\_NCBI  
CA1D3D4H5H6Hy7fov\_Hydroporus\_foveolatus\_NCBI  
CA1D3D4H5H6Hy7bas\_Hydroporus\_basinotatus\_NCBI  
CA1D3D4H5H6Hy7tes\_Hydroporus\_tessellatus\_NCBI  
CA1D3D4H5H6Hy7pub\_Hydroporus\_pubescens\_NCBI  
CA1D3D4H5H6Hy7thr\_Hydroporus\_thrasicus\_NCBI  
CA1D3D4H5H6Hy7koz\_Hydroporus\_kozlovskii\_NCBI

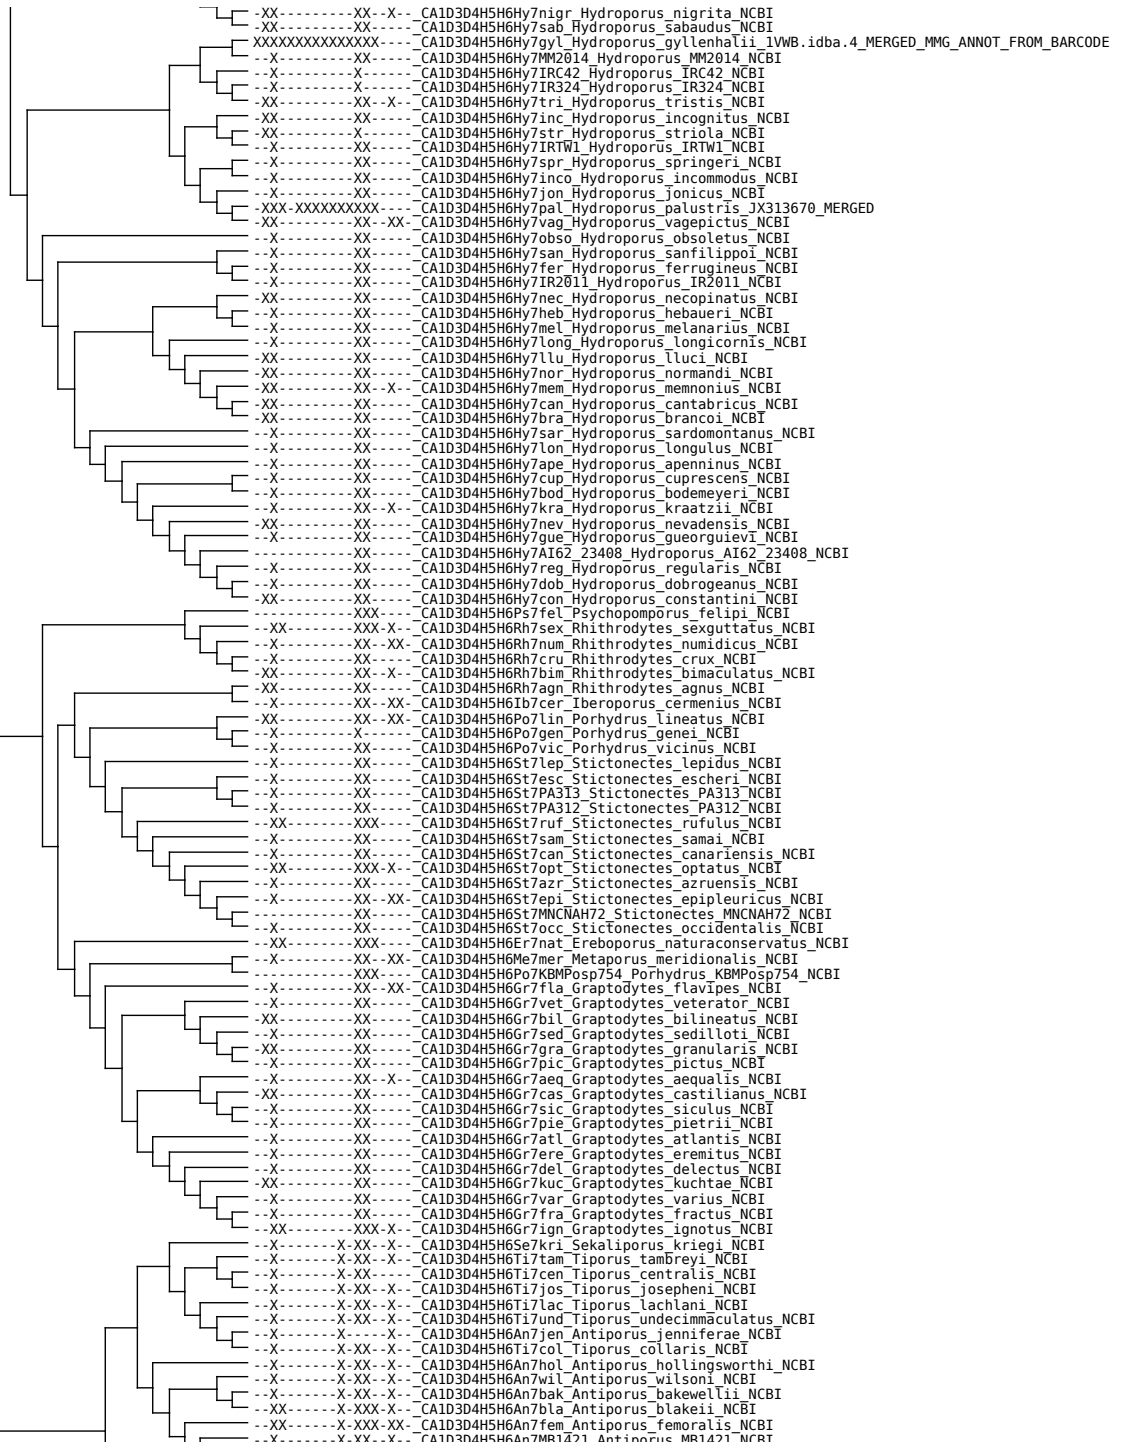

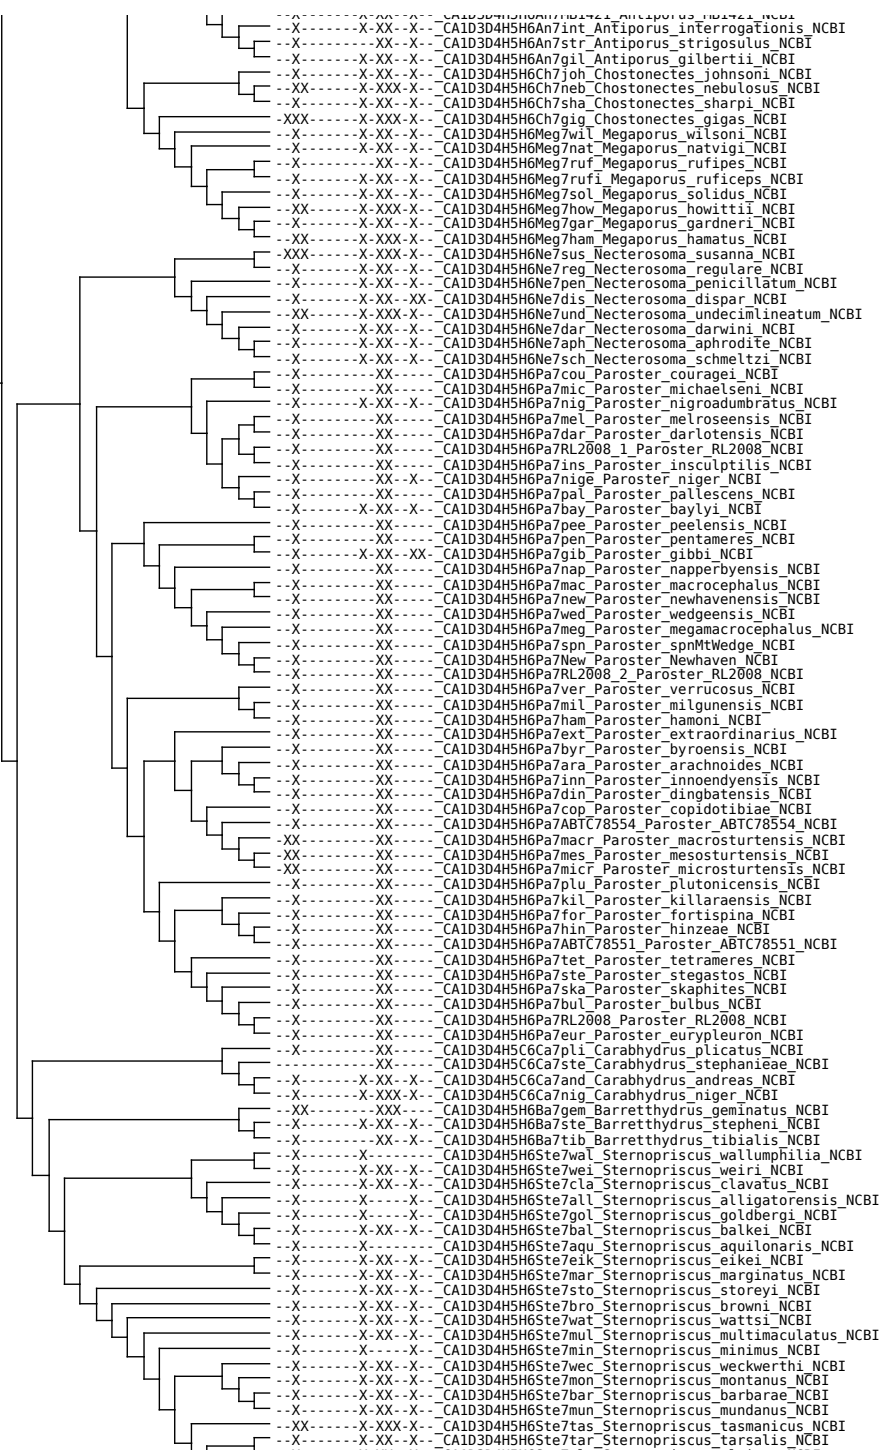

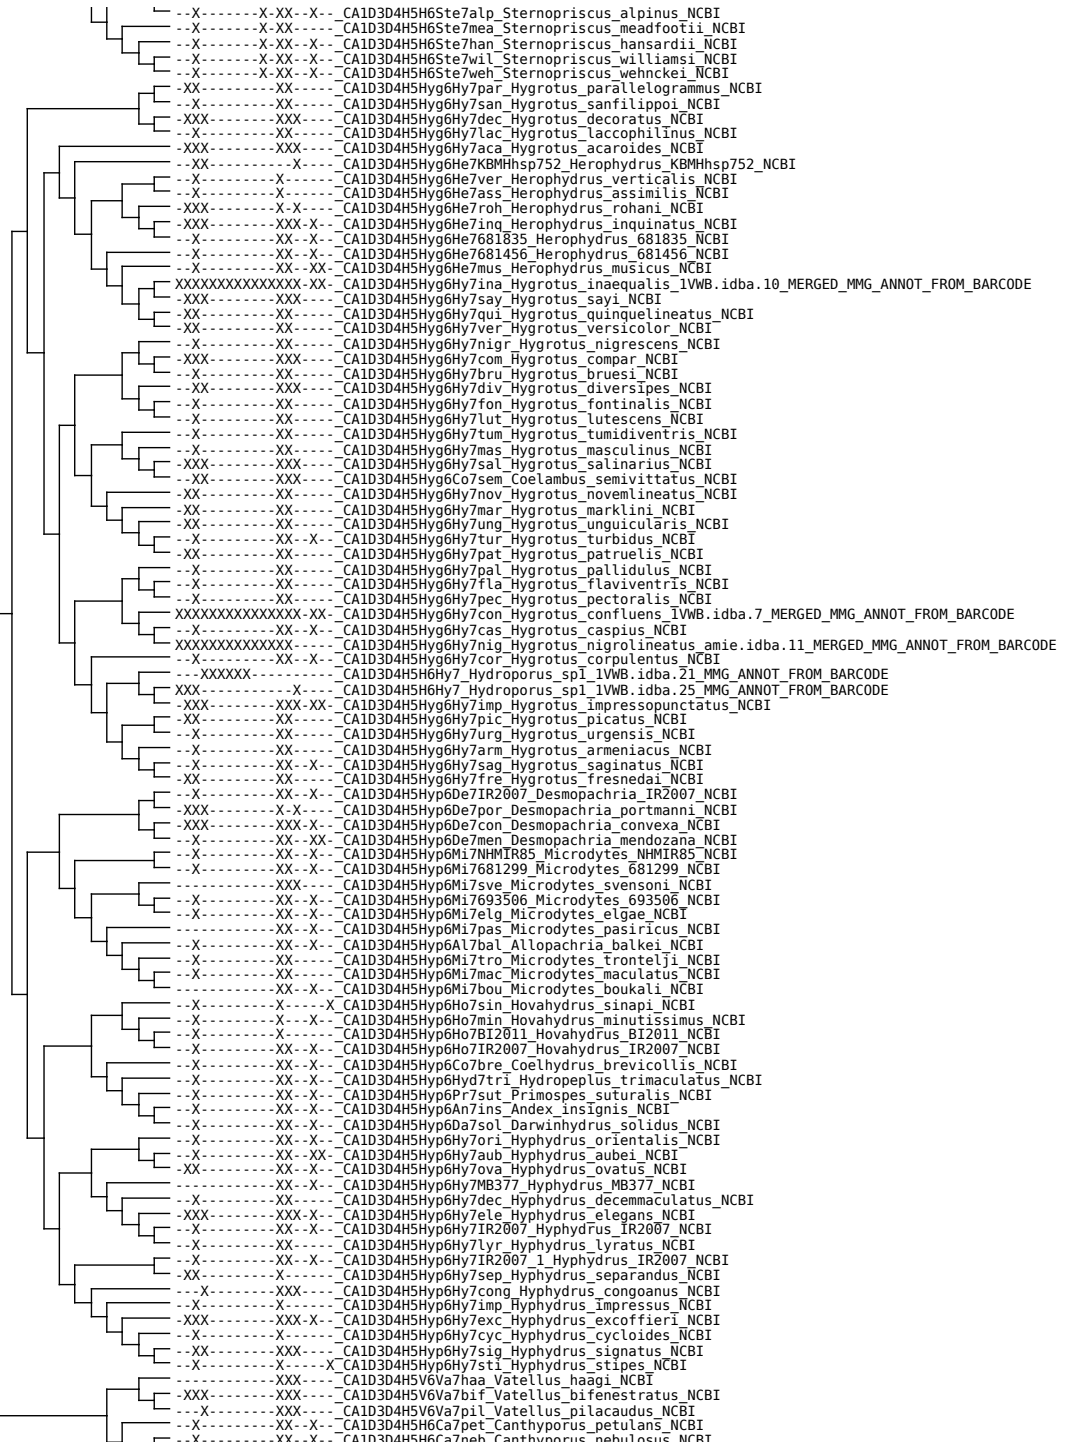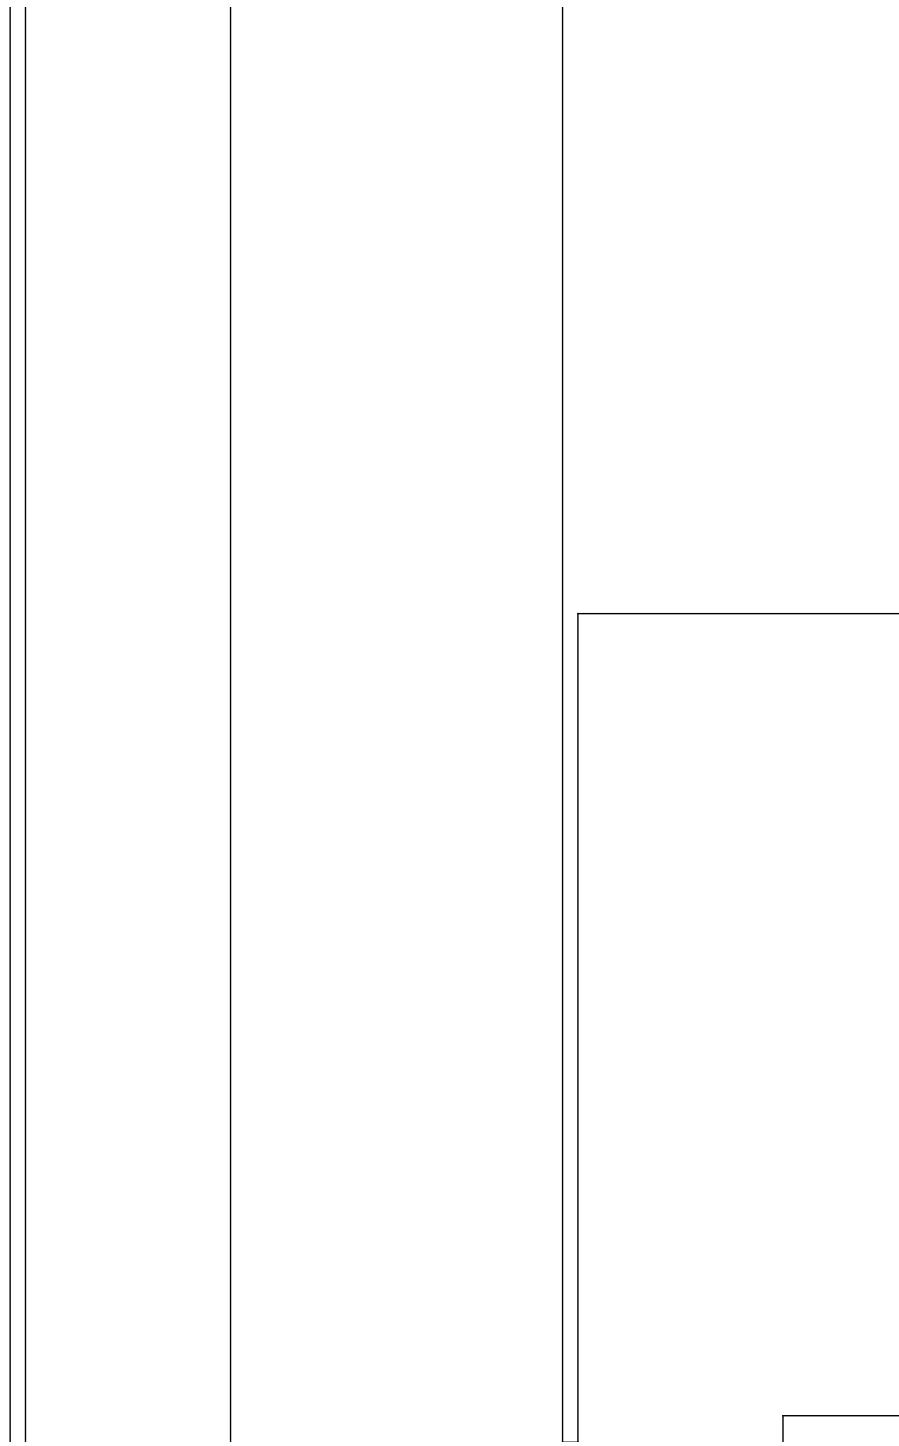

CA103D4H5H6Ca7neb\_Canthyporus\_nebulosus\_NCBI  
-X- -XX- -X- CA103D4H5H6Ca7par\_Canthyporus\_parvus\_NCBI  
-X- -XX- -X- CA103D4H5H6Ca7hot\_Canthyporus\_hottenTotus\_NCBI  
-X- -XX- -X- CA103D4H5H6Ca7bri\_Canthyporus\_brincki\_NCBI  
-X- -X- -X- CA103D4H5H6De7you\_Deronectes\_youngi\_NCBI  
-X- -X- -X- CA103D4H5H6De7per\_Deronectes\_persicus\_NCBI  
-X- -X- -X- CA103D4H5H6De7abn\_Deronectes\_abnormicollis\_NCBI  
-X- -XX- -XX- CA103D4H5H6De7par\_Deronectes\_parvicollis\_NCBI  
-XX- -XX- -XX- CA103D4H5H6De7angu\_Deronectes\_angusi\_NCBI  
-XX- -XXX- -XXX- CA103D4H5H6De7lat\_Deronectes\_latus\_NCBI  
-X- -XX- -XX- CA103D4H5H6De7opa\_Deronectes\_opatrinus\_NCBI  
-X- -XX- -XX- CA103D4H5H6De7his\_Deronectes\_hispanicus\_NCBI  
-X- -XX- -XX- CA103D4H5H6De7sah\_Deronectes\_sahlbergi\_NCBI  
-X- -XX- -XX- CA103D4H5H6De7the\_Deronectes\_theryi\_NCBI  
-X- -XX- -XX- CA103D4H5H6De7fai\_Deronectes\_fairmairei\_NCBI  
-XX- -XXX- -XX- CA103D4H5H6De7moe\_Deronectes\_foersteri\_NCBI  
-XX- -XX- -XX- CA103D4H5H6De7bra\_Deronectes\_branaii\_NCBI  
-X- -XX- -XX- CA103D4H5H6De7dor\_Deronectes\_doriae\_NCBI  
-X- -XX- -XX- CA103D4H5H6De7dep\_Deronectes\_depressicollis\_NCBI  
-XX- -XX- -XX- CA103D4H5H6De7bic\_Deronectes\_bicostatus\_NCBI  
-XX- -XX- -XX- CA103D4H5H6De7cos\_Deronectes\_costipennis\_NCBI  
-X- -XX- -XX- CA103D4H5H6De7pla\_Deronectes\_platynotus\_NCBI  
-X- -XX- -XX- CA103D4H5H6De7sem\_Deronectes\_semirufus\_NCBI  
-XX- -XX- -XX- CA103D4H5H6De7wew\_Deronectes\_wewalkai\_NCBI  
-XX- -XX- -XX- CA103D4H5H6De7fer\_Deronectes\_ferrugineus\_NCBI  
-XX- -XX- -XX- CA103D4H5H6De7del\_Deronectes\_delarouzei\_NCBI  
-XX- -XX- -X- CA103D4H5H6De7aub\_Deronectes\_aubei\_NCBI  
-X- -XX- -XX- CA103D4H5H6Bo7fun\_Boreonecetes\_funereus\_NCBI  
-XX- -XXX- -X- CA103D4H5H6Sti7corv\_Stictotarsus\_corvinus\_NCBI  
-X- -XX- -X- CA103D4H5H6Sti7corv\_Stictotarsus\_corpulentus\_NCBI  
-XX- -XX- -XX- CA103D4H5H6Bo7str\_Boreonecetes\_striatellus\_NCBI  
-X- -XX- -XX- CA103D4H5H6Bo7rib\_Boreonecetes\_riberae\_NCBI  
-X- -XX- -XX- CA103D4H5H6Bo7mul\_Boreonecetes\_multilineatus\_NCBI  
-XX- -XX- -X- CA103D4H5H6Bo7gri\_Boreonecetes\_griseostriatus\_NCBI  
-X- -XX- -XX- CA103D4H5H6Bo7mac\_Boreonecetes\_macedonicus\_NCBI  
-X- -XX- -XX- CA103D4H5H6Bo7alp\_Boreonecetes\_alpestris\_NCBI  
-X- -XX- -XX- CA103D4H5H6Sti7ibe\_Stictotarsus\_ibericus\_NCBI  
-X- -XX- -X- CA103D4H5H6Or7nat\_Oreodytes\_natix\_NCBI  
-XX- -XX- -XX- CA103D4H5H6Or7sep\_Oreodytes\_septentrionalis\_NCBI  
-XX- -XXX- -XXX- CA103D4H5H6Or7sci\_Oreodytes\_scitulus\_NCBI  
-X- -XX- -XX- CA103D4H5H6Or7sho\_Oreodytes\_shorti\_NCBI  
-X- -XX- -XX- CA103D4H5H6Or7sno\_Oreodytes\_snoqualmie\_NCBI  
-X- -XX- -XX- CA103D4H5H6Or7mon\_Oreodytes\_mongolicus\_NCBI  
-XX- -XX- -X- CA103D4H5H6Or7dav\_Oreodytes\_davisi\_NCBI  
-XX- -XX- -XX- CA103D4H5H6Or7alp\_Oreodytes\_alpinus\_NCBI  
-X- -XX- -X- CA103D4H5H6Or7pic\_Oreodytes\_picturatus\_NCBI  
-XX- -XXX- -X- CA103D4H5H6Or7qua\_Oreodytes\_quadrimaculatus\_NCBI  
-X- -XX- -XX- CA103D4H5H6Tr7oti\_Trichonecetes\_otini\_NCBI  
-XX- -XXX- -X- CA103D4H5H6Or7con\_Oreodytes\_congruus\_NCBI  
-X- -XX- -XX- CA103D4H5H6Or7abb\_Oreodytes\_abbreviatus\_NCBI  
-X- -XX- -X- CA103D4H5H6Or7rhyb\_Oreodytes\_rhyacophilus\_NCBI  
-X- -XX- -X- CA103D4H5H6Or7cra\_Oreodytes\_crasellus\_NCBI  
-X- -XX- -XX- CA103D4H5H6Or7obe\_Oreodytes\_obesus\_NCBI  
-X- -XX- -XX- CA103D4H5H6Or7san\_Oreodytes\_sanmarikii\_NCBI  
-X- -XX- -XX- CA103D4H5H6Sti7duo\_Stictotarsus\_duodecimpustulatus\_NCBI  
-X- -XX- -XX- CA103D4H5H6Neb7for\_Nebrioporus\_formaster\_NCBI  
-XX- -XX- -XX- CA103D4H5H6Sti7ber\_Stictotarsus\_bertrandi\_NCBI  
-X- -XX- -XX- CA103D4H5H6Sti7pro\_Stictotarsus\_procerus\_NCBI  
-X- -XX- -XX- CA103D4H5H6Sti7mag\_Stictotarsus\_maghrebinus\_NCBI  
-XX- -XX- -X- CA103D4H5H6Sc7hal\_Scarodytes\_halensis\_NCBI  
-X- -XX- -XX- CA103D4H5H6Sc7mal\_Scarodytes\_malickyi\_NCBI  
-X- -XX- -XX- CA103D4H5H6Sc7IR2003\_Scarodytes\_IR2003\_NCBI  
-X- -XX- -XX- CA103D4H5H6Sc7sav\_Scarodytes\_savinensis\_NCBI  
-X- -XX- -X- CA103D4H5H6Sc7nig\_Scarodytes\_nigriventris\_NCBI  
-X- -XX- -XX- CA103D4H5H6Sc7ruf\_Scarodytes\_ruffoi\_NCBI  
-X- -XX- -XX- CA103D4H5H6Sc7ped\_Scarodytes\_pederzani\_NCBI  
-X- -XX- -XX- CA103D4H5H6Neb7cer\_Nebrioporus\_ceresyi\_NCBI  
-XX- -XX- -XX- CA103D4H5H6Neb7bae\_Nebrioporus\_baeticus\_NCBI  
-X- -XX- -XX- CA103D4H5H6Neb7nem\_Nebrioporus\_nemethi\_NCBI  
-X- -XX- -XX- CA103D4H5H6Neb7can\_Nebrioporus\_canaliculatus\_NCBI  
-X- -XX- -XX- CA103D4H5H6Neb7nip\_Nebrioporus\_nipponicus\_NCBI  
-XX- -XX- -XX- CA103D4H5H6Neb7air\_Nebrioporus\_silurinus\_NCBI  
-X- -XX- -XX- CA103D4H5H6Neb7ass\_Nebrioporus\_assimilis\_NCBI  
-XX- -XX- -XX- CA103D4H5H6Neb7car\_Nebrioporus\_carinatus\_NCBI  
-XX- -XX- -XX- CA103D4H5H6Neb7cro\_Nebrioporus\_croceus\_NCBI  
-XX- -XX- -XX- CA103D4H5H6Neb7fab\_Nebrioporus\_fabresei\_NCBI  
-X- -XX- -XX- CA103D4H5H6Neb7rot\_Nebrioporus\_rotundatus\_NCBI  
-XX- -XX- -XX- CA103D4H5H6Neb7ele\_Nebrioporus\_elegans\_NCBI  
-XX- -XX- -XX- CA103D4H5H6Neb7dep\_Nebrioporus\_depressus\_NCBI  
-X- -XX- -XX- CA103D4H5H6Neb7dub\_Nebrioporus\_dubius\_NCBI  
-X- -XX- -XX- CA103D4H5H6Neb7cana\_Nebrioporus\_canariensis\_NCBI  
-X- -XX- -XX- CA103D4H5H6Neb7mas\_Nebrioporus\_mascatenensis\_NCBI  
-X- -XX- -XX- CA103D4H5H6Neb7ste\_Nebrioporus\_stearinus\_NCBI  
-X- -X- -X- CA103D4H5H6Neb7var\_Nebrioporus\_variegatus\_NCBI  
-X- -XX- -XX- CA103D4H5H6Neb7ami\_Nebrioporus\_amicorum\_NCBI  
-X- -XX- -XX- CA103D4H5H6Neb7lan\_Nebrioporus\_lanceolatus\_NCBI  
-X- -XX- -XX- CA103D4H5H6Neb7luc\_Nebrioporus\_luctuosus\_NCBI  
-XX- -XX- -X- CA103D4H5H6Neb7cla\_Nebrioporus\_clarkii\_NCBI  
-X- -XX- -XX- CA103D4H5H6Neb7mar\_Nebrioporus\_martini\_NCBI  
-XX- -XX- -XX- CA103D4H5H6Neb7buc\_Nebrioporus\_ducheti\_NCBI  
-XX- -XX- -XX- CA103D4H5H6Neb7fen\_Nebrioporus\_fenestratus\_NCBI  
-XX- -XX- -XX- CA103D4H5M6Me7cri\_Methles\_cribratellus\_NCBI  
-XX- -XX- -XX- CA103D4H5M6Me7NHMIR244\_Methles\_NHMIR244\_NCBI  
-X- -XX- -XX- CA103D4H5M6Ce7imi\_Celina\_imitatrix\_NCBI  
-X- -XX- -XX- CA103D4H5M6Ce7681533\_Celina\_681533\_NCBI

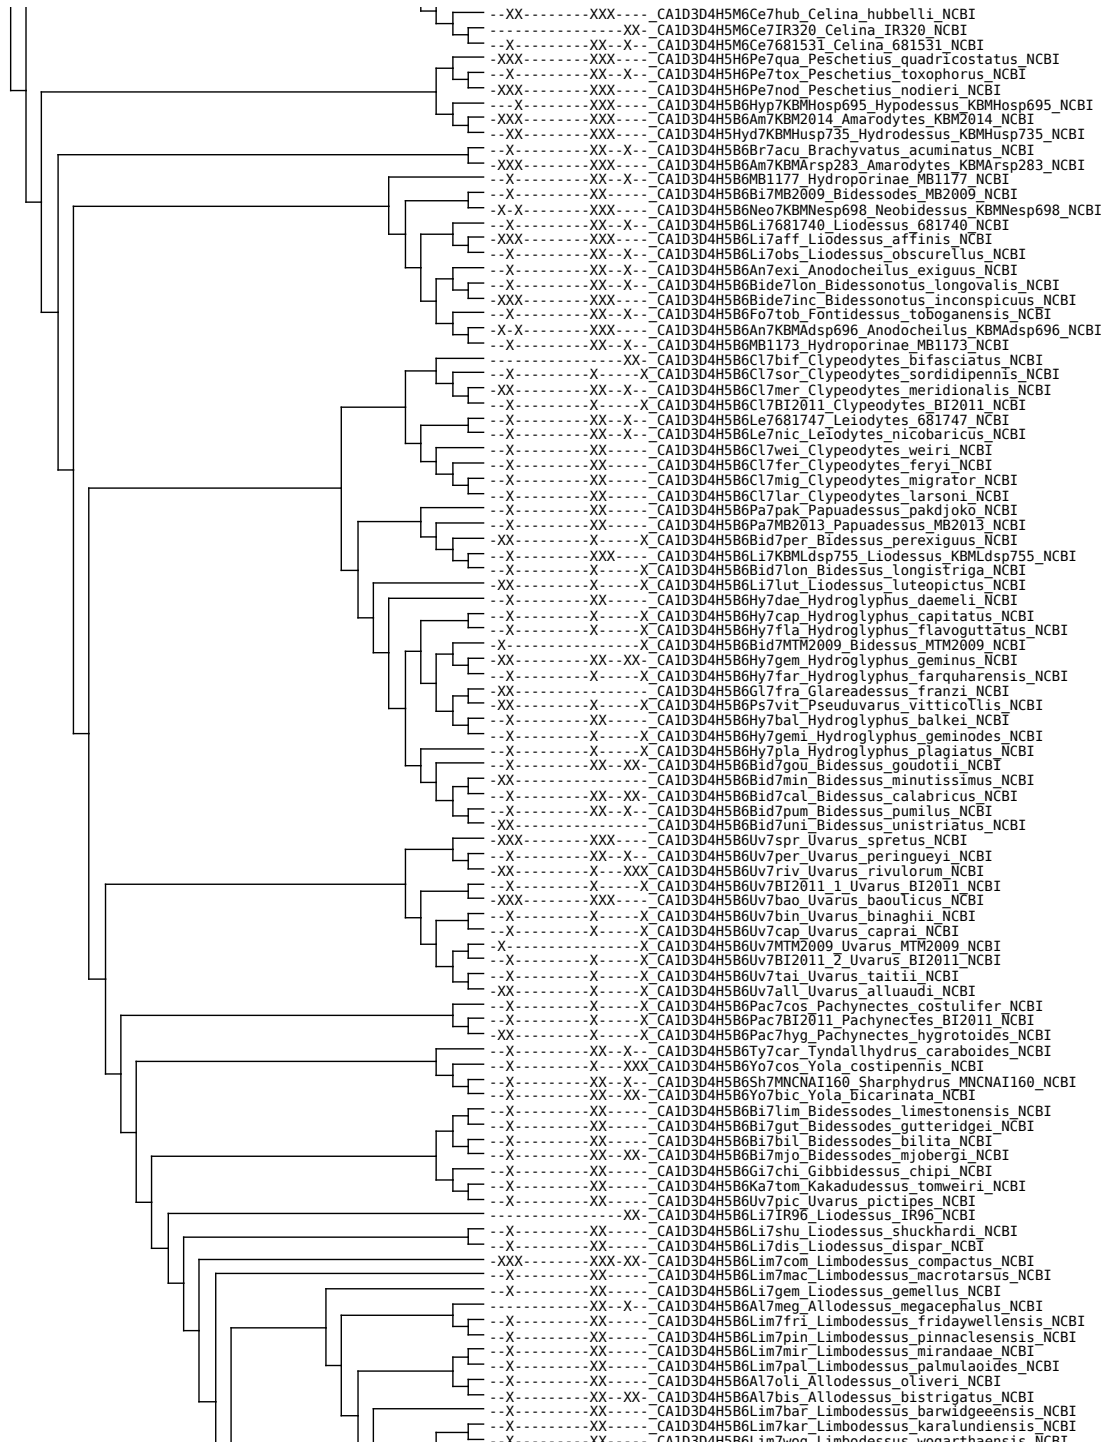



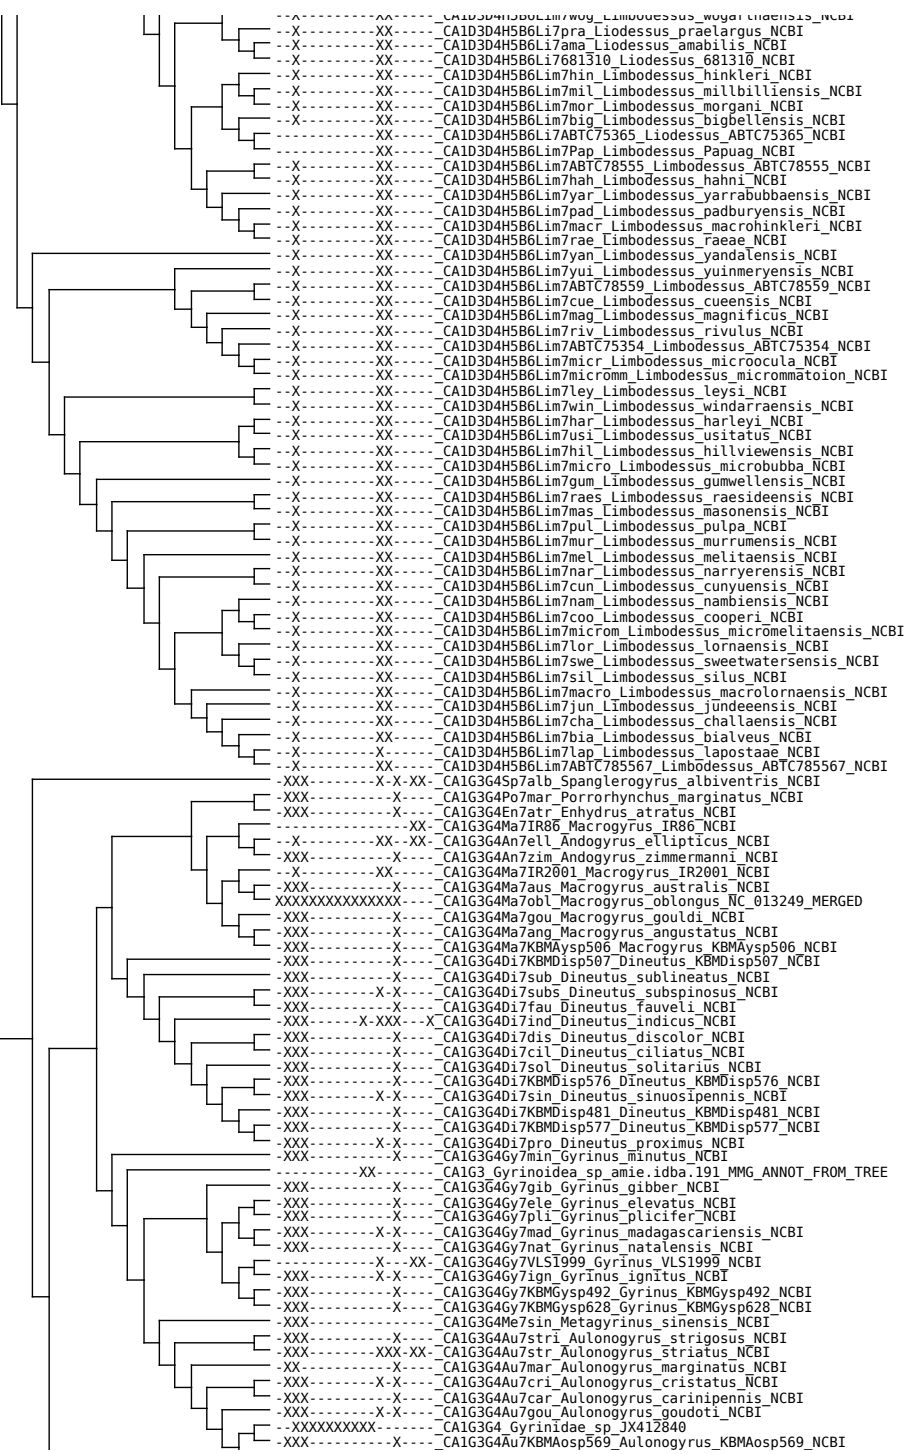

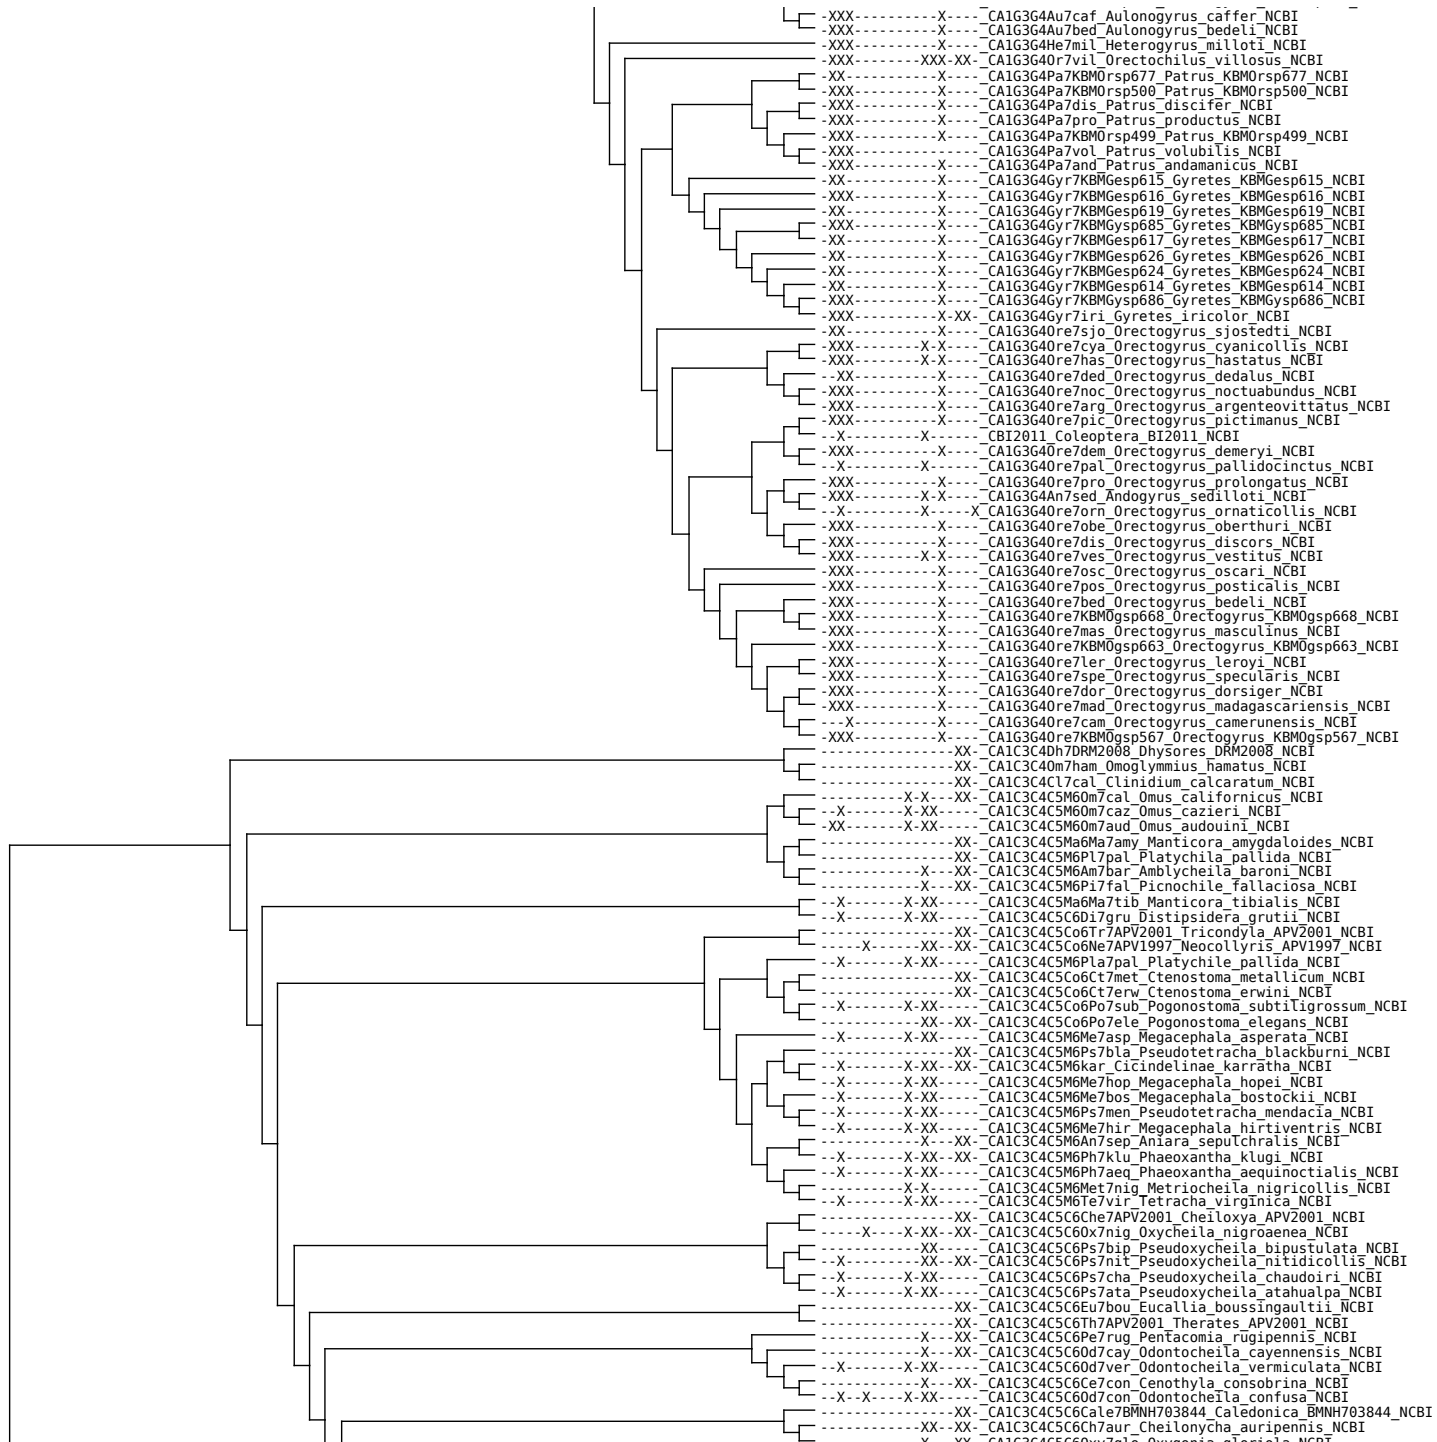

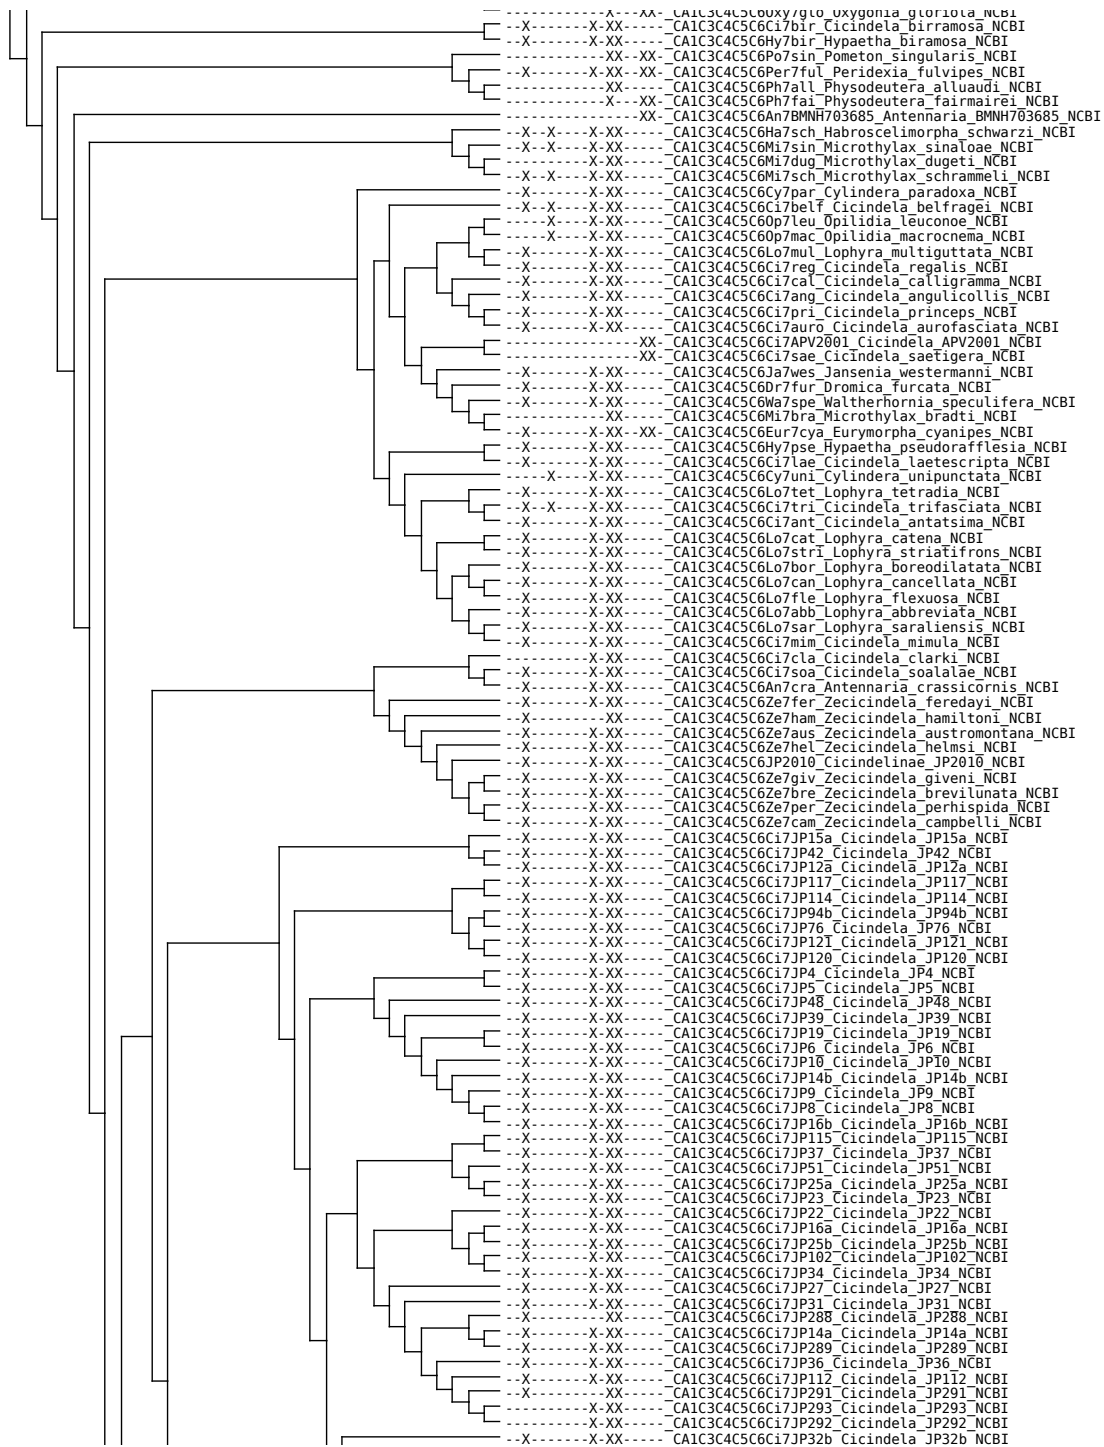

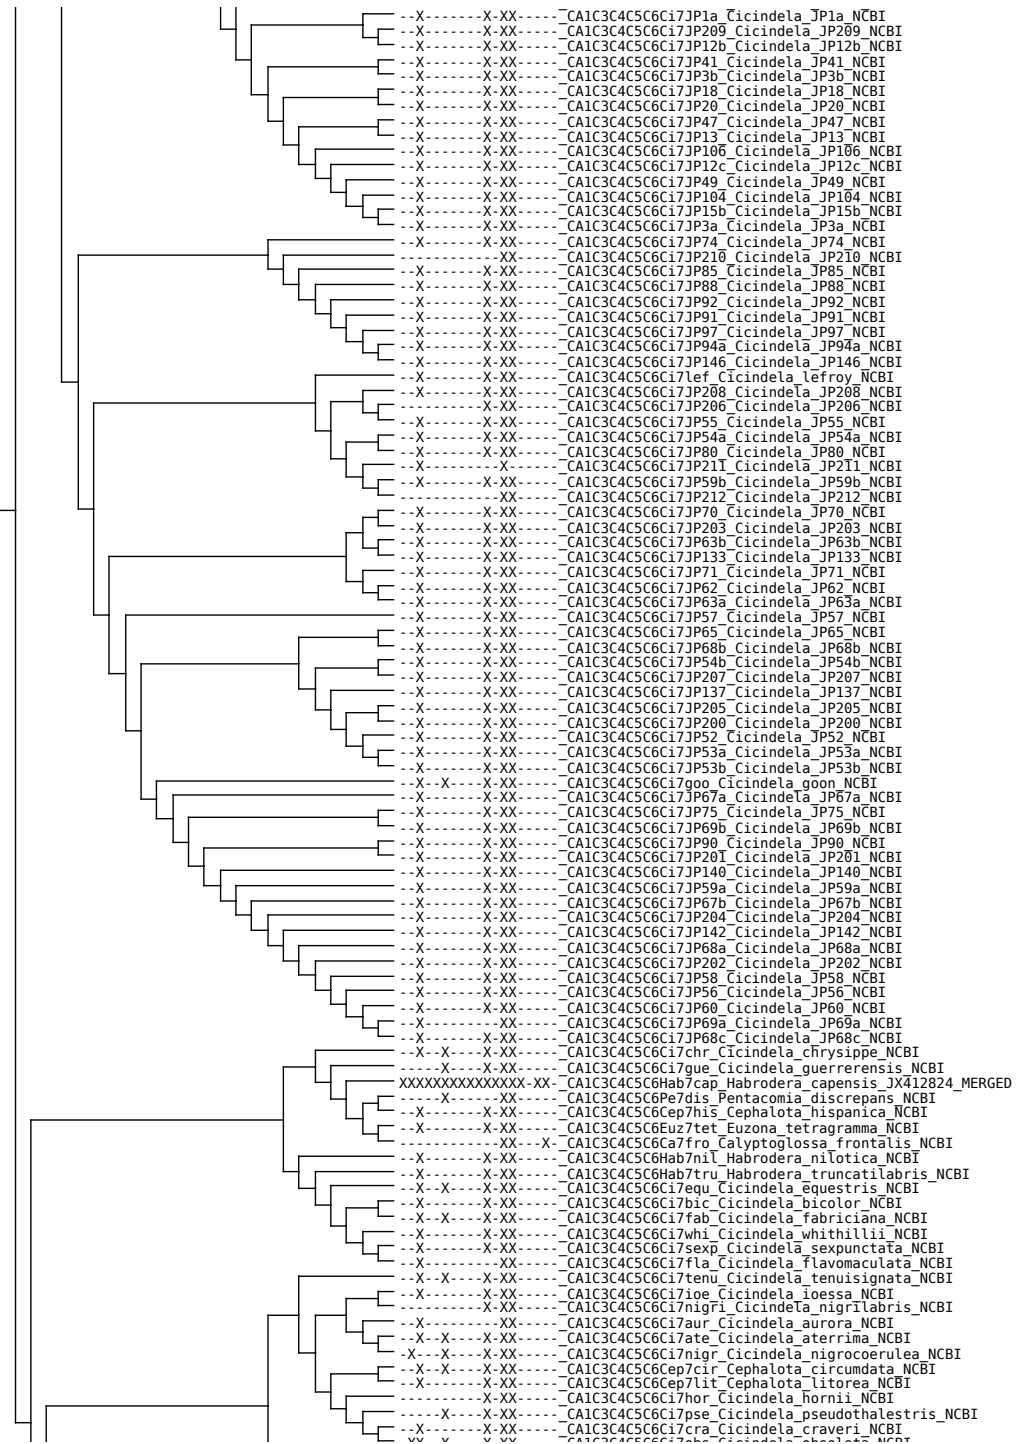

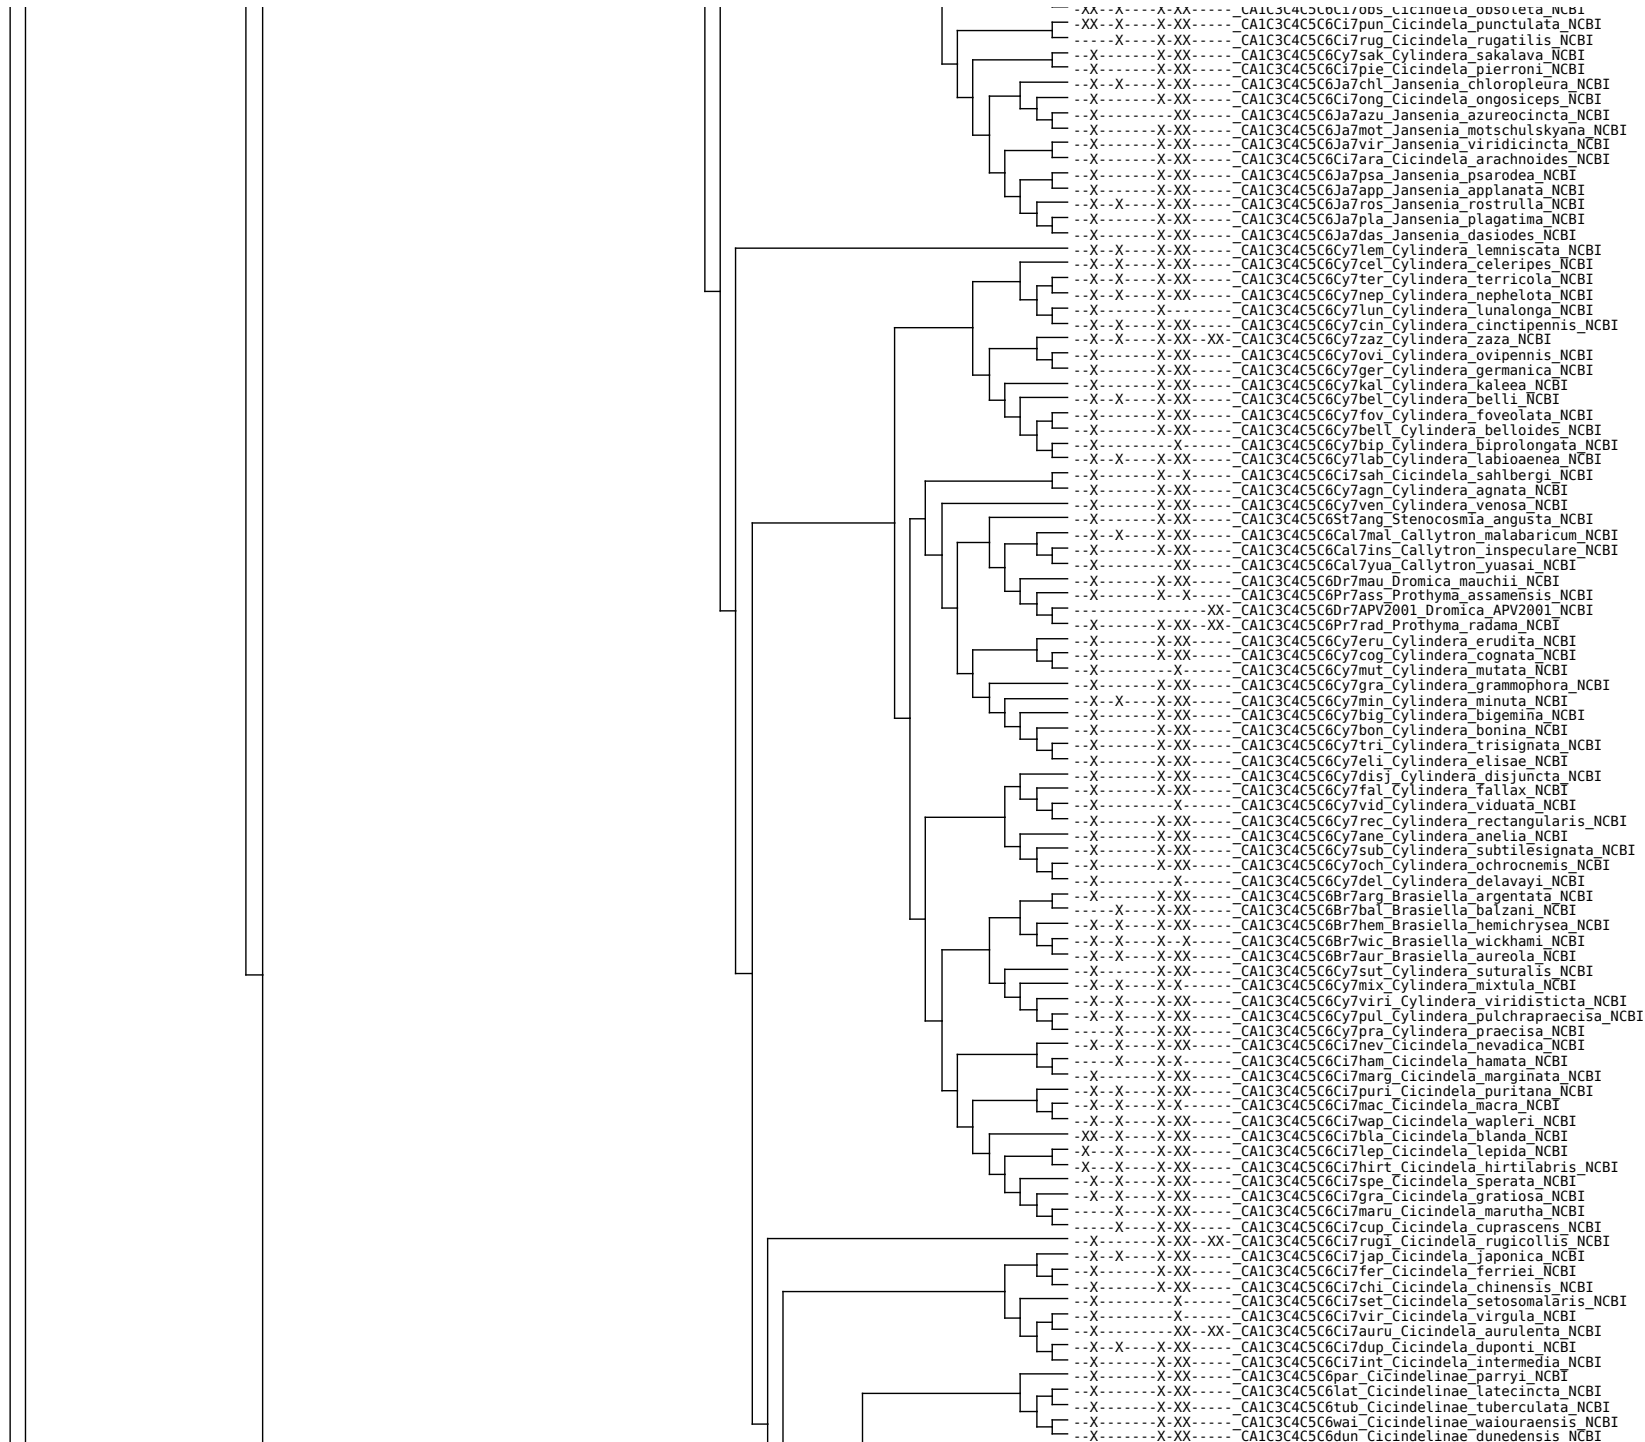

-X-----X-XX--XX- CA1C3C4C5C6Lo5str Lophyra striolata NCBI  
-----XX- CA1C3C4C5C6C17BMH703842 Cicindela BMH703842 NCBI  
-X-----X-XX- CA1C3C4C5C6Cy7deb Cylindera debilis NCBI  
-X-----X-XX- CA1C3C4C5C6C17lew Cicindela lewisi NCBI  
-X-----X-XX- CA1C3C4C5C6Cy7wil Cylindera willeyi NCBI  
-X-----X-XX- CA1C3C4C5C6Cy7wat Cylindera waterhousei NCBI  
-X-X-----X-XX- CA1C3C4C5C6C17japa Cicindela japana NCBI  
-X-----X-XX- CA1C3C4C5C6C17gem Cicindela gemmata NCBI  
-XX-----X-XX- CA1C3C4C5C6C17cam Cicindela campestris NCBI  
-X-X-----X-XX- CA1C3C4C5C6C17mar Cicindela maroccana NCBI  
-X-----X-XX- CA1C3C4C5C6C17lag Cicindela lagunensis NCBI  
-X-----X-XX- CA1C3C4C5C6C17ibe Cicindela iberica NCBI  
-X-----X-XX- CA1C3C4C5C6C17maj Cicindela majalis NCBI  
-XX-----X-XX- CA1C3C4C5C6C17hyb Cicindela hybrida NCBI  
-X-----X-XX- CA1C3C4C5C6C17lus Cicindela lusitanica NCBI  
-X-----X-XX- CA1C3C4C5C6C17tran Cicindela transversalis NCBI  
-X-----X-XX- CA1C3C4C5C6Cy7sev Cylindera severini NCBI  
-X-X-----X-XX- CA1C3C4C5C6C17rep Cicindela repanda NCBI  
-XX-X-----X-XX- CA1C3C4C5C6C17mari Cicindela maritima NCBI  
-XX-X-----X-XX- CA1C3C4C5C6C17hir Cicindela hirticollis NCBI  
-X-X-----X-XX- CA1C3C4C5C6C17cya Cicindela cyaniventris NCBI  
-X-X-----X-XX- CA1C3C4C5C6C17aen Cicindela aeneicollis NCBI  
-X-X-----X-XX- CA1C3C4C5C6C17duo Cicindela duodecimguttata NCBI  
-----X-X-X- CA1C3C4C5C6C17dep Cicindela depressula NCBI  
-X-X-----X-XX- CA1C3C4C5C6C17are Cicindela arenicola NCBI  
-----X-X-XX- CA1C3C4C5C6C17way Cicindela waynei NCBI  
-X-----X-XX- CA1C3C4C5C6C17colu Cicindela columbica NCBI  
-X-X-----X-XX- CA1C3C4C5C6C17the Cicindela theatina NCBI  
-X-X-----X-XX- CA1C3C4C5C6C17bel Cicindela bellissima NCBI  
-X-X-----X-XX- CA1C3C4C5C6C17lim Cicindela limbata NCBI  
-X-X-----X-XX- CA1C3C4C5C6C17ore Cicindela oregona NCBI  
-X-X-----X-XX- CA1C3C4C5C6Ha7cur Habroscelimorpha curvata NCBI  
-----X-X-XX- CA1C3C4C5C6Ha7dor Habroscelimorpha dorsalis NCBI  
-X-X-----X-XX- CA1C3C4C5C6Ha7pam Habroscelimorpha pamphila NCBI  
-X-X-----X-XX- CA1C3C4C5C6Ha7gab Habroscelimorpha gabbi NCBI  
-X-X-----X-XX- CA1C3C4C5C6C17tog Cicindela togata NCBI  
-XX-X-----X-XX- CA1C3C4C5C6Ha7cal Habroscelimorpha californica NCBI  
-X-X-----X-XX- CA1C3C4C5C6Ha7sev Habroscelimorpha severa NCBI  
-X-----X-XX- CA1C3C4C5C6Ha7boo Habroscelimorpha boops NCBI  
-----XX- CA1C3C4C5C6Ha7str Habroscelimorpha striga NCBI  
-----X-X-XX- CA1C3C4C5C6Ha7cir Habroscelimorpha circumpecta NCBI  
-----X-X-XX- CA1C3C4C5C6Ha7pra Habroscelimorpha praetextata NCBI  
-----X-X-XX- CA1C3C4C5C6Ha7ful Habroscelimorpha fulgoris NCBI  
-X-----X-XX- CA1C3C4C5C6C17ken Cicindela kenya NCBI  
-----X-X-XX- CA1C3C4C5C6C17abe Cicindela aberrans NCBI  
-X-X-----X-XX- CA1C3C4C5C6Op7gra Opilidia graphiptera NCBI  
-X-X-----X-XX- CA1C3C4C5C6Op7chl Opilidia chlorocephala NCBI  
-X-X-----X-XX- CA1C3C4C5C6M7fas Myriochila fastidiosa NCBI  
-X-X-----X-XX- CA1C3C4C5C6M7spe Myriochila speculifera NCBI  
-----X-X-XX- CA1C3C4C5C6M7mas Myriochila mastersi NCBI  
-X-X-----X-XX- CA1C3C4C5C6M7par Myriochila parasemicincta NCBI  
-X-----X-XX- CA1C3C4C5C6M7hau Myriochila hauseri NCBI  
-X-X-----X-XX- CA1C3C4C5C6M7und Myriochila undulata NCBI  
-----X-X-XX- CA1C3C4C5C6M7mel Myriochila melancholica NCBI  
-----X-XX- CA1C3C4C5C6Ha7eur Habroscelimorpha euryscopa NCBI  
-XX-----X-XX- CA1C3C4C5C6C17tra Cicindela transbaicalica NCBI  
-X-X-----X-XX- CA1C3C4C5C6C17anch Cicindela anchoralis NCBI  
-X-X-----X-XX- CA1C3C4C5C6C17som Cicindela sommeri NCBI  
-X-X-----X-XX- CA1C3C4C5C6C17ros Cicindela roseiventris NCBI  
-----X-XX- CA1C3C4C5C6C17rufo Cicindela rufoaenea NCBI  
-X-----X-XX- CA1C3C4C5C6C17mat Cicindela mathani NCBI  
-X-----X-XX- CA1C3C4C5C6C17oce Cicindela ocellata NCBI  
-X-X-----X-XX- CA1C3C4C5C6C17hig Cicindela highlandensis NCBI  
-----X-X-XX- CA1C3C4C5C6C17abd Cicindela abdominalis NCBI  
-----X-X-XX-XX- CA1C3C4C5C6C17sed Cicindela sedecimpunctata NCBI  
-XX-X-----X-XX- CA1C3C4C5C6C17ruf Cicindela rufiventris NCBI  
-XX-----X-XX- CA1C3C4C5C6C17pol Cicindela politula NCBI  
-----X-X-XX- CA1C3C4C5C6C17caz Cicindela cazieri NCBI  
-X-X-----X-XX- CA1C3C4C5C6C17sch Cicindela schauppii NCBI  
-----X-X-XX- CA1C3C4C5C6C17nebu Cicindela nebuligera NCBI  
-X-X-----X-XX- CA1C3C4C5C6C17oax Cicindela oaxensis NCBI  
-X-X-----X-XX- CA1C3C4C5C6C17flo Cicindela flohri NCBI  
-X-X-----X-XX- CA1C3C4C5C6C17clar Cicindela clarina NCBI  
-----X-X-XX- CA1C3C4C5C6C17hyd Cicindela hydrophoba NCBI  
-----X-X-XX- CA1C3C4C5C6C17rufi Cicindela ruficaputi NCBI  
-X-----X-XX- CA1C3C4C5C6C17dys Cicindela dysenterica NCBI  
-X-X-----X-XX- CA1C3C4C5C6C17ben Cicindela beneshi NCBI  
-----X-X-XX- CA1C3C4C5C6C17hae Cicindela haemorrhagica NCBI  
-X-X-----X-XX- CA1C3C4C5C6C17car Cicindela carthagensis NCBI  
-X-X-----X-XX- CA1C3C4C5C6C17lun Calomera lunulata NCBI  
-X-----X-XX- CA1C3C4C5C6C17lug Calomera lugens NCBI  
-X-X-----X-XX- CA1C3C4C5C6C17car Calomera cardoni NCBI  
-----X-X-XX- CA1C3C4C5C6C17chl Calomera chloris NCBI  
-X-----X-XX- CA1C3C4C5C6C17ang Calomera angulata NCBI  
-X-----X-XX- CA1C3C4C5C6C17spl Cicindela splendida NCBI  
-X-X-----X-XX- CA1C3C4C5C6C17lat Cicindela latesignata NCBI  
-XX-X-----X-XX- CA1C3C4C5C6C17tranq Cicindela tranquebarica NCBI  
-X-----X-XX- CA1C3C4C5C6Pro7ang Prothymidia angusticollis NCBI  
-XX-----X-XX- CA1C3C4C5C6C17pur Cicindela purpurea NCBI  
-XX-X-----X-XX- CA1C3C4C5C6C17wil Cicindela willistoni NCBI  
-X-----X-XX- CA1C3C4C5C6Cy7lac Cylindera lacunosa NCBI  
-X-----X-XX- CA1C3C4C5C6C17len Cicindela lengi NCBI  
-XX-X-----X-XX- CA1C3C4C5C6C17sex Cicindela sexguttata NCBI  
-X-X-----X-XX- CA1C3C4C5C6C17pat Cicindela patruela NCBI  
-X-X-----X-XX- CA1C3C4C5C6C17pul Cicindela pulchra NCBI



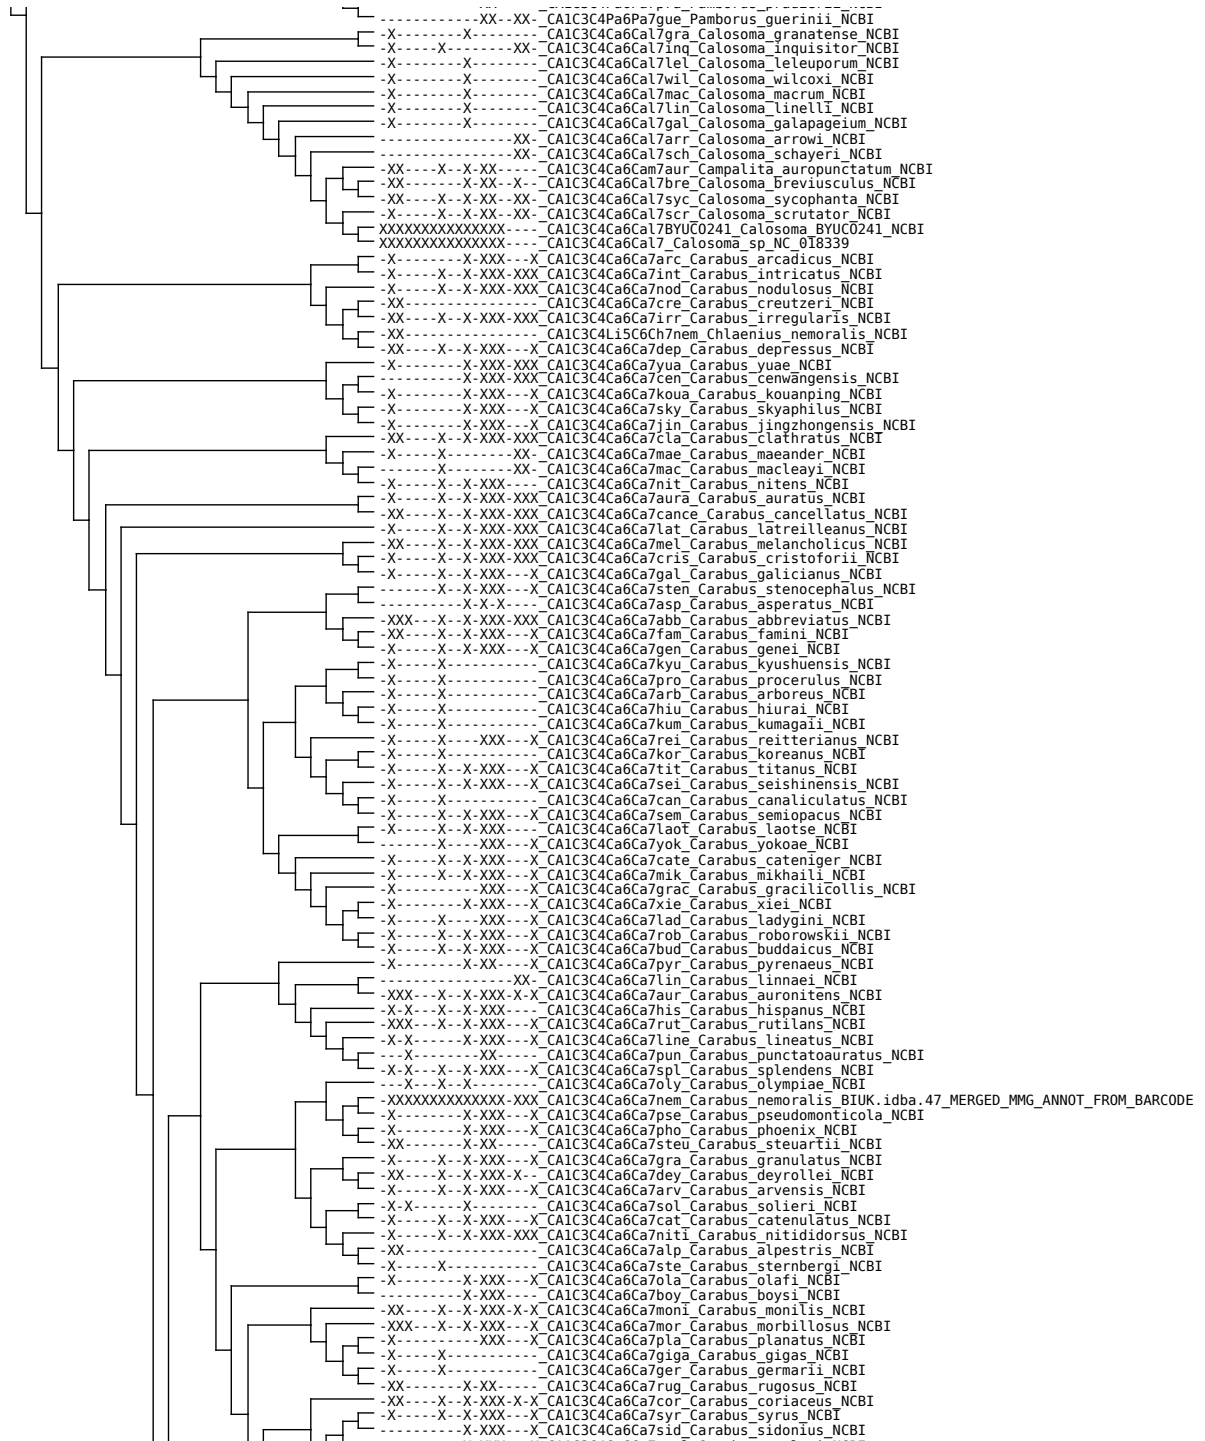



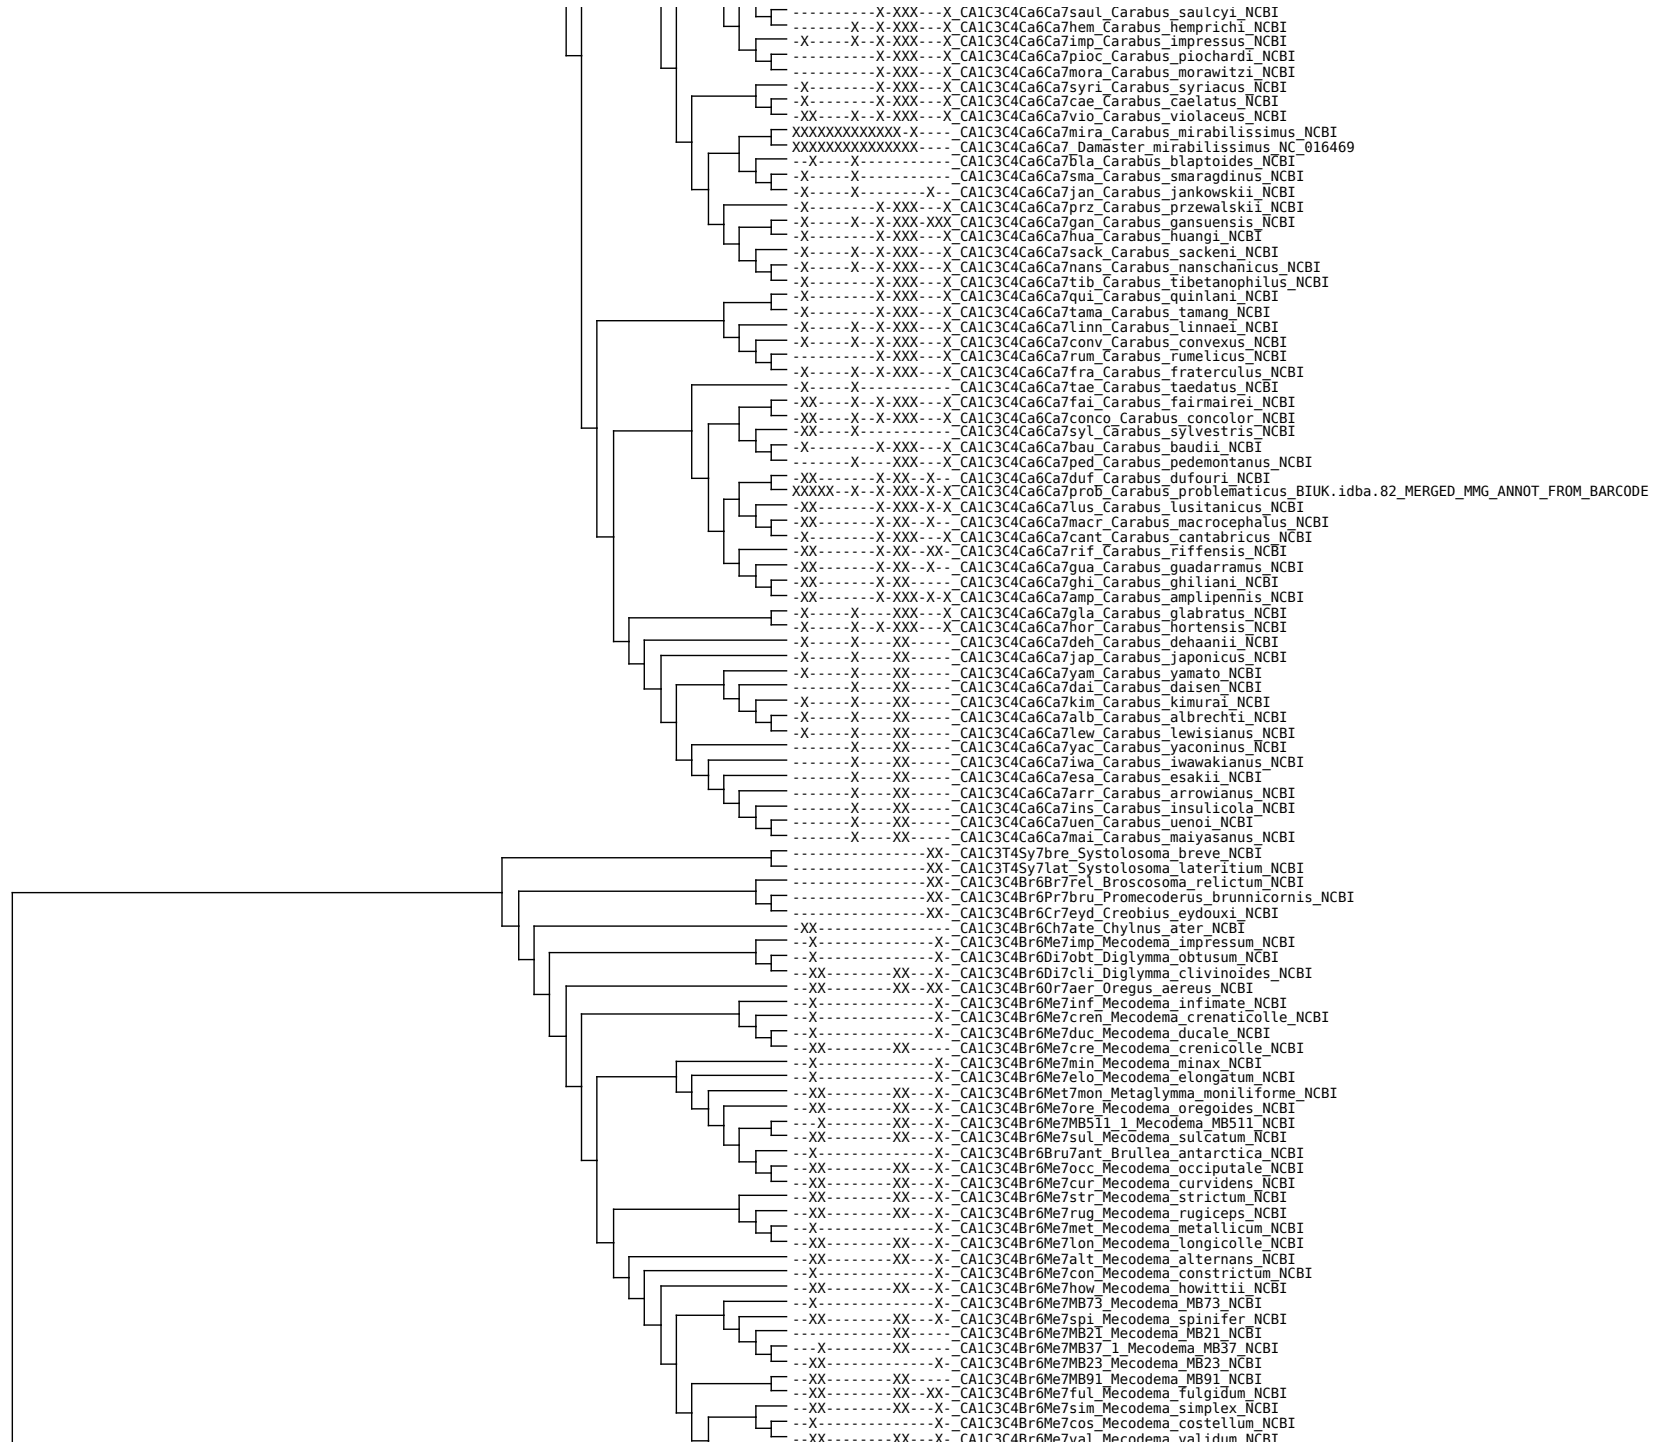

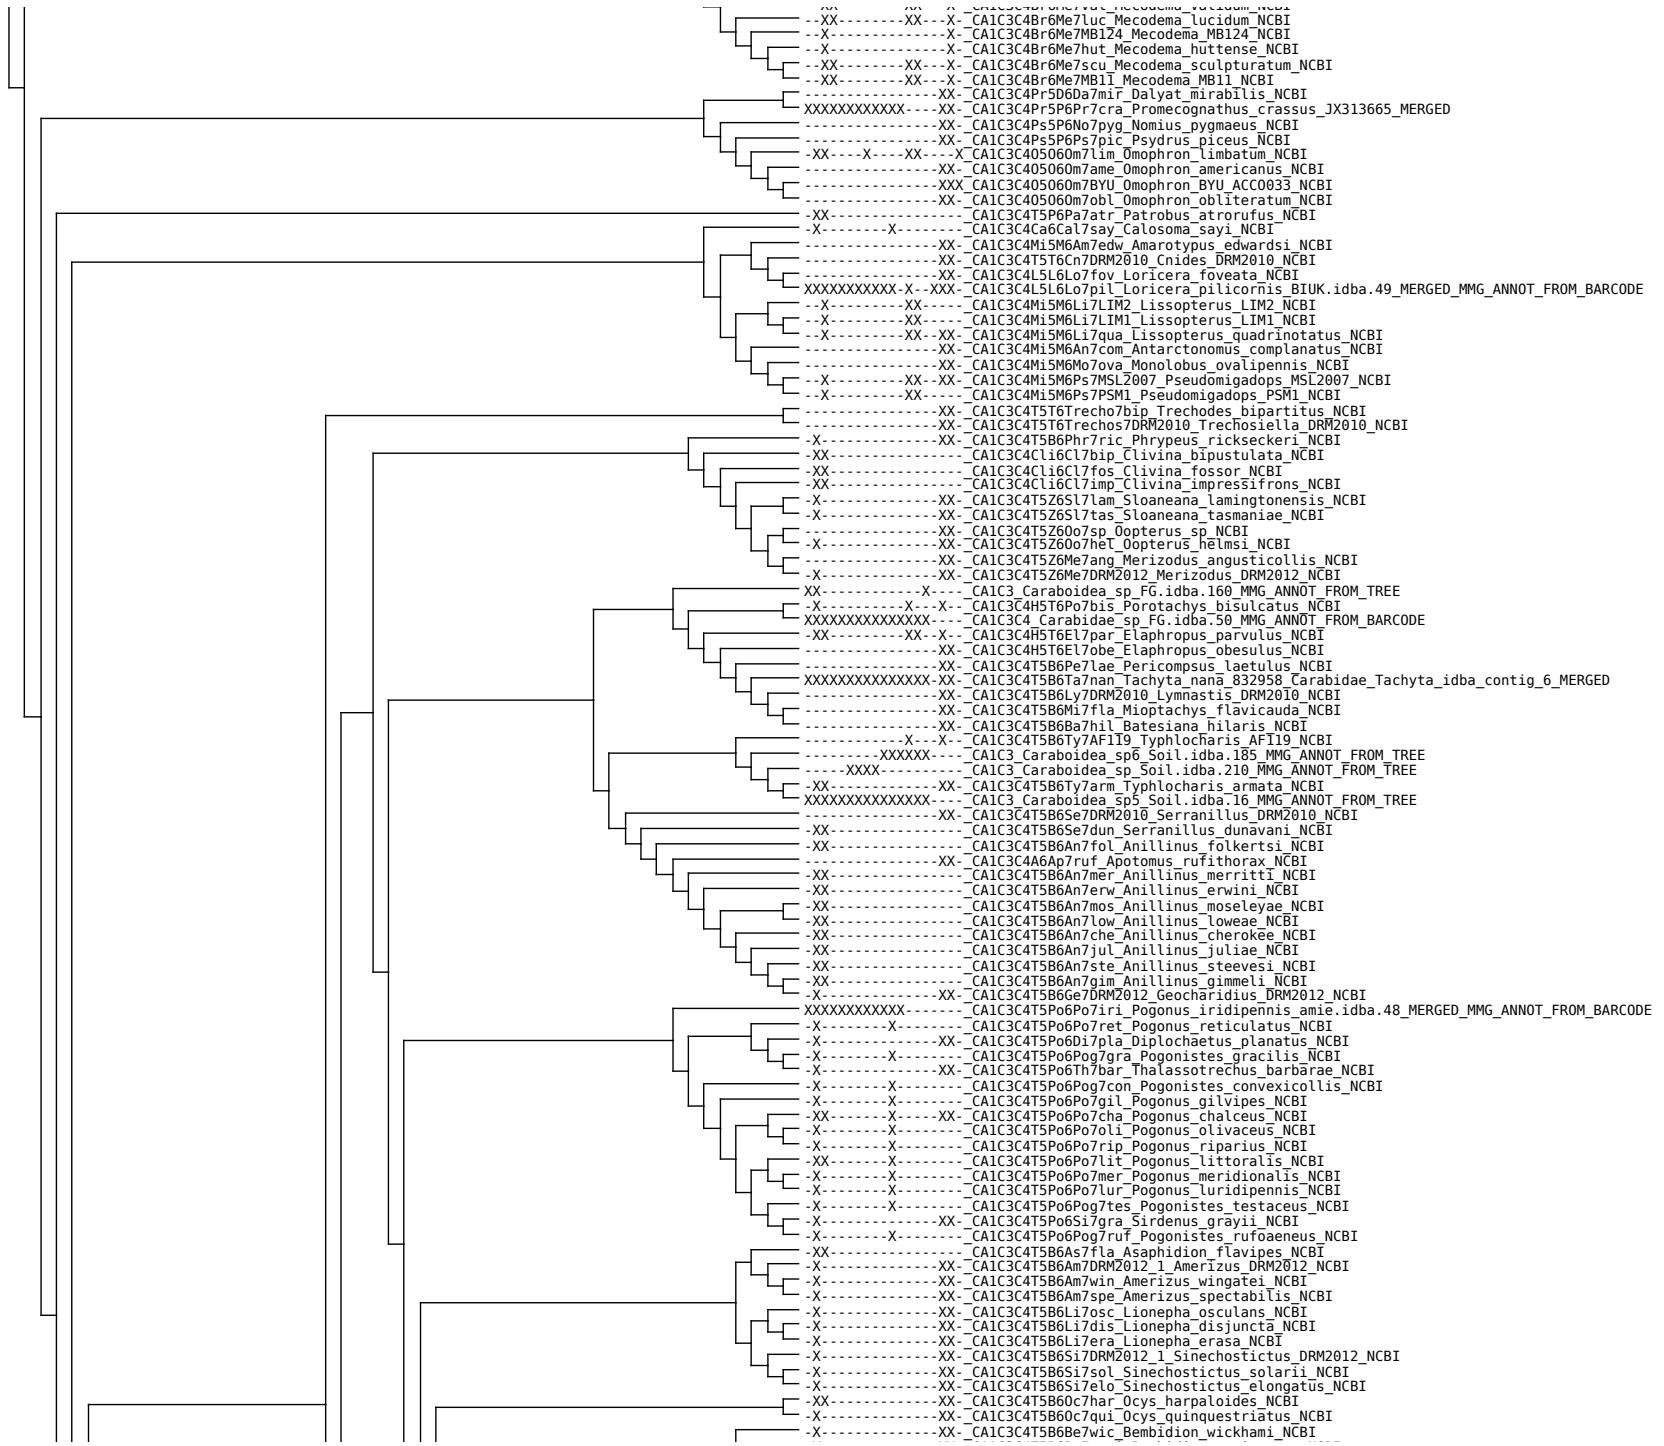

XX- CA1C3C4R6Me7Luc\_Mecodema\_lucidum\_NCBI  
X- CA1C3C4R6Me7MB124\_Mecodema\_MB124\_NCBI  
X- CA1C3C4R6Me7hut\_Mecodema\_huttense\_NCBI  
XX- CA1C3C4R6Me7scu\_Mecodema\_sculpturatum\_NCBI  
XX- CA1C3C4R6Me7MB1I\_Mecodema\_MB1I\_NCBI  
XX- CA1C3C4Pr5D6Da7miR\_Dalyat\_mirabilis\_NCBI  
XXXXXXXXXXXX- CA1C3C4Pr5P6Pr7cra\_Promecognathus\_crassus\_JX313665\_MERGED  
XX- CA1C3C4Ps5P6No7pyg\_Nomius\_pygmaeus\_NCBI  
XX- CA1C3C4Ps5P6Ps7pic\_Psydrus\_piceus\_NCBI  
XX- X- CA1C3C4O5O6Om7lim\_Omophron\_limbatum\_NCBI  
XX- CA1C3C4O5O6Om7ame\_Omophron\_americanus\_NCBI  
XX- CA1C3C4O5O6Om7BYU\_Omophron\_BYU\_ACC0033\_NCBI  
XX- CA1C3C4O5O6Om7obl\_Omophron\_obliteratedum\_NCBI  
XX- CA1C3C4T5P6P7atr\_Patrobis\_atrorufus\_NCBI  
X- CA1C3C4Ca6Ca7say\_Calosoma\_sayi\_NCBI  
XX- CA1C3C4M15M6Am7edw\_Amarotyplus\_edwardsi\_NCBI  
XX- CA1C3C4T5T6Cn7DRM2010\_Cnides\_DRM2010\_NCBI  
XX- CA1C3C4L5L6Lo7fov\_Loricera\_foveata\_NCBI  
XXXXXXXXXXXX- X- XXX- CA1C3C4L5L6Lo7pil\_Loricera\_pilicornis\_BIUK.idba.49\_MERGED\_MMG\_ANNOT\_FROM\_BARCODE  
X- CA1C3C4M15M6Li7LIM2\_Lissopterus\_LIM2\_NCBI  
X- CA1C3C4M15M6Li7LIM1\_Lissopterus\_LIM1\_NCBI  
XX- CA1C3C4M15M6Li7qua\_Lissopterus\_quadrirotatus\_NCBI  
XX- CA1C3C4M15M6An7com\_Antarctonotus\_complanatus\_NCBI  
XX- CA1C3C4M15M6Mo7ova\_Monolobus\_ovalipennis\_NCBI  
X- XX- CA1C3C4M15M6Ps7MSL2007\_Pseudomigadops\_MSL2007\_NCBI  
XX- CA1C3C4M15M6Ps7PSM1\_Pseudomigadops\_PSM1\_NCBI  
XX- CA1C3C4T5T6T7recho7bip\_Trechodes\_bipartitus\_NCBI  
XX- CA1C3C4T5T6T7rechos7DRM2010\_Trechosiella\_DRM2010\_NCBI  
X- CA1C3C4T5B6Phr7ric\_Phrypeus\_rickseckeri\_NCBI  
XX- CA1C3C4Cl16Cl7bip\_Clivina\_bipustulata\_NCBI  
XX- CA1C3C4Cl16Cl7fos\_Clivina\_fossor\_NCBI  
XX- CA1C3C4Cl16Cl7lmp\_Clivina\_impresifrons\_NCBI  
XX- CA1C3C4T5Z6S17lam\_Sloaneana\_lamingtonensis\_NCBI  
X- CA1C3C4T5Z6S17tas\_Sloaneana\_tasmaniae\_NCBI  
XX- CA1C3C4T5Z6Oo7sp\_Oopterus\_sp\_NCBI  
X- CA1C3C4T5Z6Oo7het\_Oopterus\_helmsi\_NCBI  
XX- CA1C3C4T5Z6Me7ang\_Merizodus\_angusticollis\_NCBI  
X- CA1C3C4T5Z6Me7DRM2012\_Merizodus\_DRM2012\_NCBI  
XX- CA1C3\_Caraboidea\_sp\_FG.idba.160\_MMG\_ANNOT\_FROM\_TREE  
X- CA1C3C4H5T6Po7bis\_Porotachys\_bisulcatus\_NCBI  
XXXXXXXXXXXX- CA1C3C4\_Carabidae\_sp\_FG.idba.50\_MMG\_ANNOT\_FROM\_BARCODE  
XX- CA1C3C4H5T6EL7par\_Elaphropus\_parvulus\_NCBI  
XX- CA1C3C4H5T6EL7obe\_Elaphropus\_obesulus\_NCBI  
XX- CA1C3C4T5B6Pe7lae\_Pericompsus\_laetulus\_NCBI  
XXXXXXXXXXXX- CA1C3C4T5B6Ta7nan\_Tachyta\_nana\_832958\_Carabidae\_Tachyta\_idba\_contig\_6\_MERGED  
XX- CA1C3C4T5B6Ly7DRM2010\_Lymnastis\_DRM2010\_NCBI  
XX- CA1C3C4T5B6M17fla\_Mioptachys\_flavicauda\_NCBI  
XX- CA1C3C4T5B6Ba7hil\_Batesiana\_hilaris\_NCBI  
X- CA1C3C4T5B6Ty7AF1I9\_Typhlocharris\_AF1I9\_NCBI  
XXXX- CA1C3\_Caraboidea\_sp6\_Soil.idba.185\_MMG\_ANNOT\_FROM\_TREE  
XXXX- CA1C3\_Caraboidea\_sp\_Soil.idba.210\_MMG\_ANNOT\_FROM\_TREE  
XX- CA1C3C4T5B6Ty7arm\_Typhlocharris\_armata\_NCBI  
XXXXXXXXXXXX- CA1C3\_Caraboidea\_sp5\_Soil.idba.16\_MMG\_ANNOT\_FROM\_TREE  
XX- CA1C3C4T5B6Se7DRM2010\_Serranillus\_DRM2010\_NCBI  
XX- CA1C3C4T5B6Se7dun\_Serranillus\_dunavani\_NCBI  
XX- CA1C3C4T5B6An7fol\_Anillinus\_folkerti\_NCBI  
XX- CA1C3C4A6Ap7ruf\_Apotomus\_rufithorax\_NCBI  
XX- CA1C3C4T5B6An7mer\_Anillinus\_merritti\_NCBI  
XX- CA1C3C4T5B6An7erw\_Anillinus\_erwini\_NCBI  
XX- CA1C3C4T5B6An7mos\_Anillinus\_moseleyae\_NCBI  
XX- CA1C3C4T5B6An7low\_Anillinus\_loweae\_NCBI  
XX- CA1C3C4T5B6An7che\_Anillinus\_cherokeee\_NCBI  
XX- CA1C3C4T5B6An7jul\_Anillinus\_juliae\_NCBI  
XX- CA1C3C4T5B6An7ste\_Anillinus\_steevesi\_NCBI  
XX- CA1C3C4T5B6An7gim\_Anillinus\_gimmeli\_NCBI  
X- CA1C3C4T5B6Ge7DRM2012\_Geocharidius\_DRM2012\_NCBI  
XXXXXXXXXXXX- CA1C3C4T5P6Po7iri\_Pogonus\_iridipennis\_ami.idba.48\_MERGED\_MMG\_ANNOT\_FROM\_BARCODE  
X- CA1C3C4T5P6Po7ret\_Pogonus\_reticulatus\_NCBI  
XX- CA1C3C4T5P6Po7pla\_Diplochaetus\_planatus\_NCBI  
X- CA1C3C4T5P6Po7gra\_Pogonistes\_gracilis\_NCBI  
X- CA1C3C4T5P6Th7bar\_Thalassotrechus\_barbarae\_NCBI  
X- CA1C3C4T5P6Po7con\_Pogonistes\_convexicollis\_NCBI  
X- CA1C3C4T5P6Po7gil\_Pogonus\_gilvipes\_NCBI  
XX- CA1C3C4T5P6Po7cha\_Pogonus\_chalceus\_NCBI  
X- CA1C3C4T5P6Po7oli\_Pogonus\_olivaceus\_NCBI  
X- CA1C3C4T5P6Po7rip\_Pogonus\_riparius\_NCBI  
XX- CA1C3C4T5P6Po7lit\_Pogonus\_littoralis\_NCBI  
X- CA1C3C4T5P6Po7mer\_Pogonus\_meridionalis\_NCBI  
X- CA1C3C4T5P6Po7lur\_Pogonus\_luridipennis\_NCBI  
X- CA1C3C4T5P6Po7tes\_Pogonistes\_testaceus\_NCBI  
X- CA1C3C4T5P6Si7gra\_Sirdenus\_grayii\_NCBI  
X- CA1C3C4T5P6Po7ruf\_Pogonistes\_rufoaeus\_NCBI  
XX- CA1C3C4T5B6As7fla\_Asaphidion\_flavipes\_NCBI  
X- CA1C3C4T5B6Am7DRM2012\_1\_Amerizus\_DRM2012\_NCBI  
XX- CA1C3C4T5B6Am7win\_Amerizus\_wingatei\_NCBI  
X- CA1C3C4T5B6Am7spe\_Amerizus\_spectabilis\_NCBI  
XX- CA1C3C4T5B6L17osc\_Lionepha\_osculans\_NCBI  
XX- CA1C3C4T5B6L17dis\_Lionepha\_disjuncta\_NCBI  
X- CA1C3C4T5B6L17era\_Lionepha\_erasa\_NCBI  
XX- CA1C3C4T5B6Si7DRM2012\_1\_Sinechostictus\_DRM2012\_NCBI  
X- CA1C3C4T5B6Si7sol\_Sinechostictus\_solarii\_NCBI  
XX- CA1C3C4T5B6Si7elo\_Sinechostictus\_elongatus\_NCBI  
XX- CA1C3C4T5B6Oc7har\_Ocys\_harpaloides\_NCBI  
XX- CA1C3C4T5B6Oc7qui\_Ocys\_quinquestriatus\_NCBI  
X- CA1C3C4T5B6Be7wic\_Bembidion\_wickhami\_NCBI

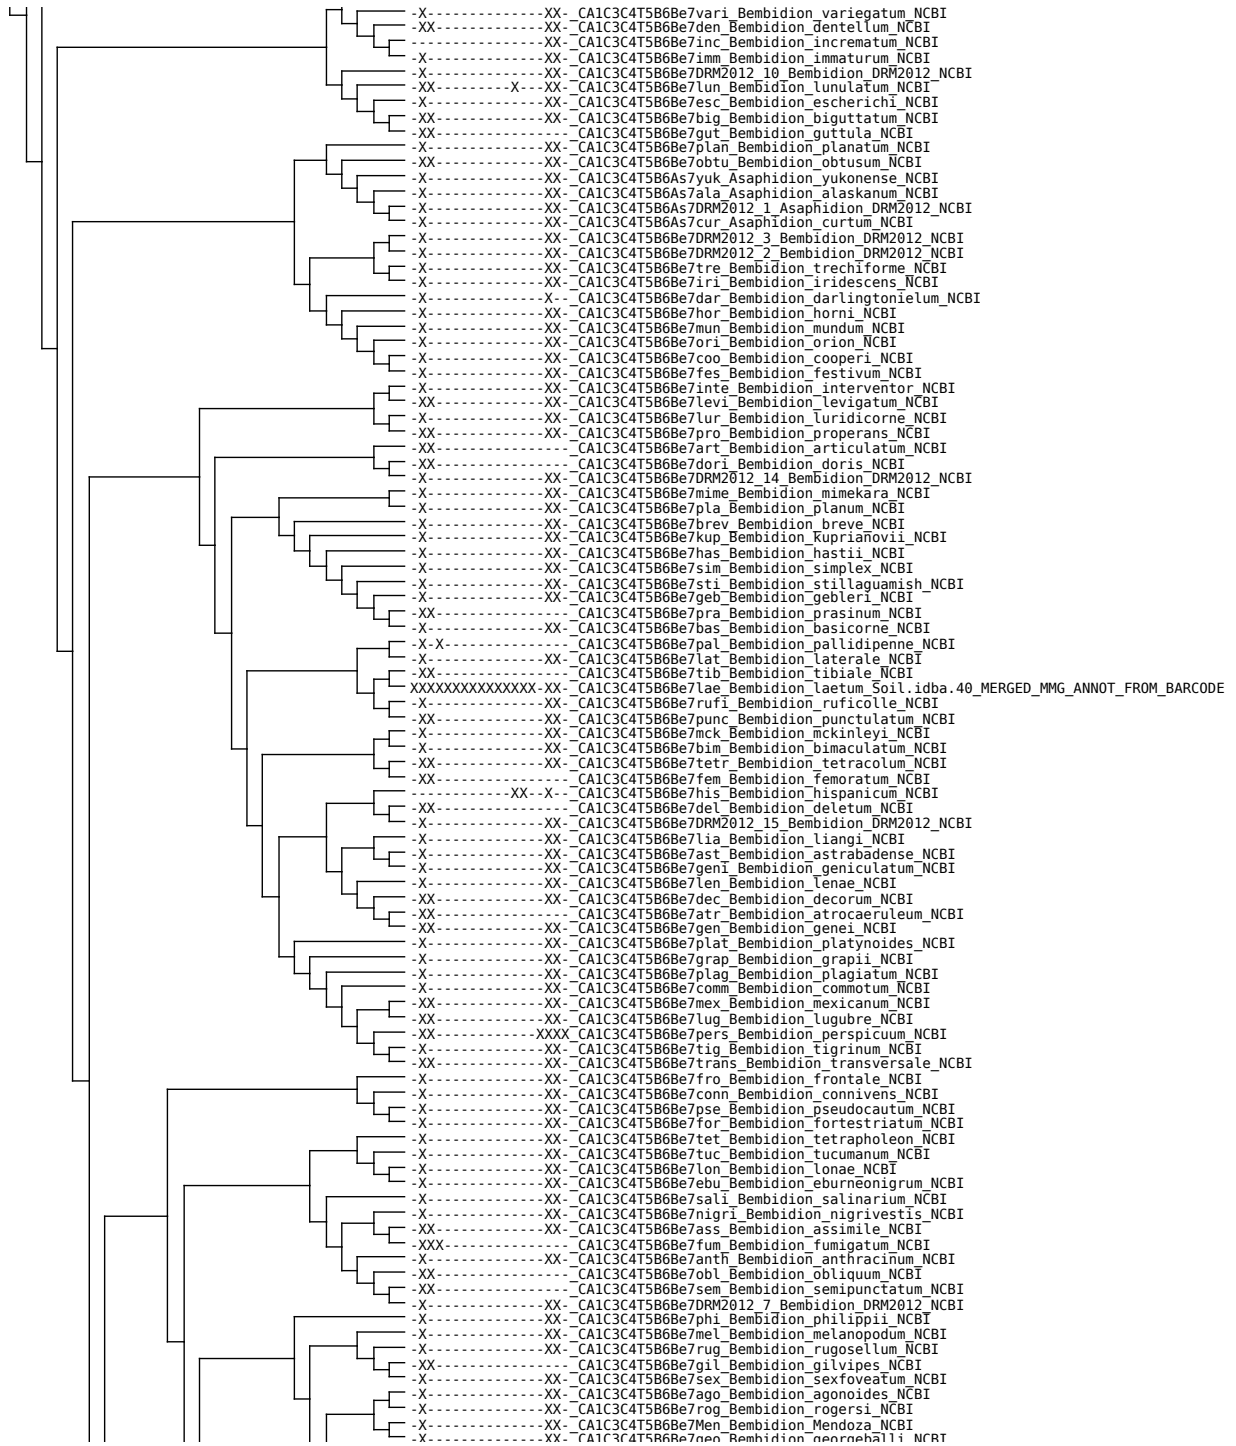



-X-----X-XX-X- CA1C3C4T5T6Ap7och Aphaenops\_ochsi NCBI  
-----X-XX- CA1C3C4T5T6Ap7jea Aphaenops\_jeanneli NCBI  
-----X-XX-X- CA1C3C4T5T6Ap7ori Aphaenops\_orionis NCBI  
-----X-X-X- CA1C3C4T5T6Ap7alb Aphaenops\_alberti NCBI  
-----X-X-X- CA1C3C4T5T6Ap7rha Aphaenops\_rhadamantus NCBI  
-----X-X-X- CA1C3C4T5T6Ap7Lud Aphaenops\_ludovici NCBI  
-----X-X-X- CA1C3C4T5T6Hy7vas Hydraphaenops\_vasconicus NCBI  
-----X-X-X- CA1C3C4T5T6Hy7pen Hydraphaenops\_penacollaradensis NCBI  
-----XX- CA1C3C4T5T6Ge7AF2013 Geotrechus\_AF2013 NCBI  
-----X-X-X- CA1C3C4T5T6Ge7tro Geotrechus\_troponius NCBI  
-----X-X- CA1C3C4T5T6Ge7orc Geotrechus\_orcinus NCBI  
-----X-XX-X- CA1C3C4T5T6Ge7dis Geotrechus\_discontignyi NCBI  
-----X-XX-X- CA1C3C4T5T6Hy7pan Hydraphaenops\_pandellei NCBI  
-----XX-X- CA1C3C4T5T6Ge7jea Geotrechus\_jeanneli NCBI  
-----X-X-X- CA1C3C4T5T6Ge7gal Geotrechus\_gallicus NCBI  
-----X-XX-X- CA1C3C4T5T6Ge7orp Geotrechus\_orpheus NCBI  
-----X-X-X- CA1C3C4T5T6Ge7sei Geotrechus\_seijasi NCBI  
-----X-X- CA1C3C4T5T6Ge7van Geotrechus\_vandeli NCBI  
-----X-XX-X- CA1C3C4T5T6Ge7sau Geotrechus\_saulcyi NCBI  
-----X-X-X- CA1C3C4T5T6Hy7ele Hydraphaenops\_elegans NCBI  
-----X-X-X- CA1C3C4T5T6Hy7coi Hydraphaenops\_coiffaiti NCBI  
-----X-X-X- CA1C3C4T5T6Hy7pec Hydraphaenops\_pecoudi NCBI  
-----X-XX-X- CA1C3C4T5T6Hy7ehl Hydraphaenops\_ehlersi NCBI  
-----X-X-X- CA1C3C4T5T6Ap7mic Aphaenops\_michaeli NCBI  
-----X-X-X- CA1C3C4T5T6Ap7del Aphaenops\_delbrelleii NCBI  
-----X-X-X- CA1C3C4T5T6Ap7bon Aphaenops\_bonneti NCBI  
-----X-X-X- CA1C3C4T5T6Ap7hus Aphaenops\_hustachei NCBI  
-----X-XX-X- CA1C3C4T5T6Ap7cry Aphaenops\_crypticola NCBI  
-----X-X-X- CA1C3C4T5T6Ap7AF133 Aphaenops\_AF133 NCBI  
-----XX-X- CA1C3C4T5T6Ap7sio Aphaenops\_sioberae NCBI  
-----X-X- CA1C3C4T5T6Ap7par Aphaenops\_parallelus NCBI  
-----X-XX-X- CA1C3C4T5T6Ap7van Aphaenops\_vandeli NCBI  
-----X-X-X- CA1C3C4T5T6Ap7mar Aphaenops\_mariaerosae NCBI  
-----X-X-X- CA1C3C4T5T6Ap7lau Aphaenops\_laurenti NCBI  
-----X-X-X- CA1C3C4T5T6Ap7buc Aphaenops\_bucephalus NCBI  
-----XX- CA1C3C4T5T6Ap7AF134 Aphaenops\_AF134 NCBI  
-----X-X-X- CA1C3C4T5T6Ap7AF42 Aphaenops\_AF42 NCBI  
-----X-X-X- CA1C3C4T5T6Ap7plu Aphaenops\_pluto NCBI  
-----X-XX-X- CA1C3C4T5T6Ap7tir Aphaenops\_tiresias NCBI  
-----XX-X- CA1C3C4T5T6Ap7cha Aphaenops\_chappuisi NCBI  
-----X-XX-X- CA1C3C4T5T6Ap7cer Aphaenops\_cerberus NCBI  
-----X-XX- CA1C3C4T5T6Ap7jau Aphaenops\_jauntoni NCBI  
-----XX- CA1C3C4T5T6Tre7MSL20071 Trechisibus\_MSL20071 NCBI  
-----XX- CA1C3C4T5T6Tre7ant Trechisibus\_antarcticus NCBI  
-----XXXXXXXXXX- 833174 Trechoblems\_sp\_idba config\_26  
-----XX- CA1C3C4T5T6B17dis Blemus\_discus NCBI  
-----X-X-X- CA1C3C4T5T6Ib7bol Iberotrechus\_bolivari NCBI  
-----XX-X- CA1C3C4T5T6T7bas Trechus\_bastropi NCBI  
-----XX-X- CA1C3C4T5T6Do7cas Doderotrechus\_casalei NCBI  
-----X-XX-X- CA1C3C4T5T6Do7ghi Doderotrechus\_ghiliani NCBI  
-----XX-X- CA1C3C4T5T6Do7cri Doderotrechus\_crissolensis NCBI  
-----XX-X- CA1C3C4T5T6Ph7glo Pheggomisetes\_globiceps NCBI  
-----XX- CA1C3C4T5T6Tre7MSL20072 Trechisibus\_MSL20072 NCBI  
-----X-XX-X- CA1C3C4T5T6Du7ber Duvalius\_berthae NCBI  
-----X-XX-X- CA1C3C4T5T6Du7ray Duvalius\_raymondi NCBI  
-----XX-X- CA1C3C4T5T6Du7aub Duvalius\_auberti NCBI  
-----XX- CA1C3C4T5T6Du7luc Duvalius\_lucidus NCBI  
-----XX-X- CA1C3C4T5T6Du7bru Duvalius\_brujasi NCBI  
-----XX-X- CA1C3C4T5T6Du7din Duvalius\_diniensis NCBI  
-----X-X- CA1C3C4T5T6A77ang Arctaphaenops\_angulipennis NCBI  
-----XX-X- CA1C3C4T5T6Tri7gou Trichaphaenops\_goumellei NCBI  
-----XX- CA1C3C4T5T6Du7lon Duvalius\_longii NCBI  
-----XX-X- CA1C3C4T5T6Du7win Duvalius\_wingelmuelleri NCBI  
-----XX-X- CA1C3C4T5T6Du7bol Duvalius\_boldorii NCBI  
-----XX- CA1C3C4T5T6Du7winK Duvalius\_winklerianus NCBI  
-----XX-X- CA1C3C4T5T6Du7goe Duvalius\_goemoerensis NCBI  
-----XX-X- CA1C3C4T5T6Du7bok Duvalius\_bokori NCBI  
-----XX-X- CA1C3C4T5T6Du7del Duvalius\_delphinensis NCBI  
-----XX- CA1C3C4T5T6An7tol Anophthalmus\_tolminensis NCBI  
-----XX-X- CA1C3C4T5T6An7sch Anophthalmus\_schatzmayri NCBI  
-----XX-X- CA1C3C4T5T6An7hir Anophthalmus\_hirtus NCBI  
-----XX-X- CA1C3C4T5T6An7schm Anophthalmus\_schmidti NCBI  
-----XX-X- CA1C3C4T5T6An7sco Anophthalmus\_scopolii NCBI  
-----XX-X- CA1C3C4T5T6An7rav Anophthalmus\_ravasinii NCBI  
-----XX- CA1C3C4T5T6An7AF2013 Anophthalmus\_AF2013 NCBI  
-----XX-X- CA1C3C4T5T6An7pre Anophthalmus\_pretneri NCBI  
-----X-X- CA1C3C4T5T6Ag7gau Agostinia\_gaudini NCBI  
-----XX- CA1C3C4T5T6Du7sza Duvalius\_szaboi NCBI  
-----XX-X- CA1C3C4T5T6Du7mic Duvalius\_micropthalmus NCBI  
-----XX-X- CA1C3C4T5T6Du7bal Duvalius\_baldensis NCBI  
-----XX-X- CA1C3C4T5T6Du7bre Duvalius\_breitii NCBI  
-----XX-X- CA1C3C4T5T6Du7con Duvalius\_convexicollis NCBI  
-----XX-X- CA1C3C4T5T6Du7eri Duvalius\_erichsonii NCBI  
-----X-XX-X- CA1C3C4T5T6Du7rob Duvalius\_roberti NCBI  
-----XX-X- CA1C3C4T5T6Du7kli Duvalius\_klimai NCBI  
-----X-XX- CA1C3C4T5T6Du7dor Duvalius\_doriae NCBI  
-----XX-X- CA1C3C4T5T6Du7AF2013 Duvalius\_AF2013 NCBI  
-----XX- CA1C3C4T5T6Du7dod Duvalius\_doderoi NCBI  
-----XX-X- CA1C3C4T5T6Du7reg Duvalius\_regisborisi NCBI  
-----XX- CA1C3C4T5T6Du7ope Duvalius\_opermanni NCBI  
-----XX- CA1C3C4T5T6Du7exa Duvalius\_exaratus NCBI  
-----XX- CA1C3C4T5T6Du7les Duvalius\_lespesii NCBI  
-----XX-X- CA1C3C4T5T6Du7cad Duvalius\_cadurcus NCBI  
-----XX-X- CA1C3C4T5T6Du7gen Duvalius\_gentilei NCBI  
-----X-XX- CA1C3C4T5T6Du7can Duvalius\_canevae NCBI  
-----XX- CA1C3C4T5T6Du7sic Duvalius\_sicardi NCBI

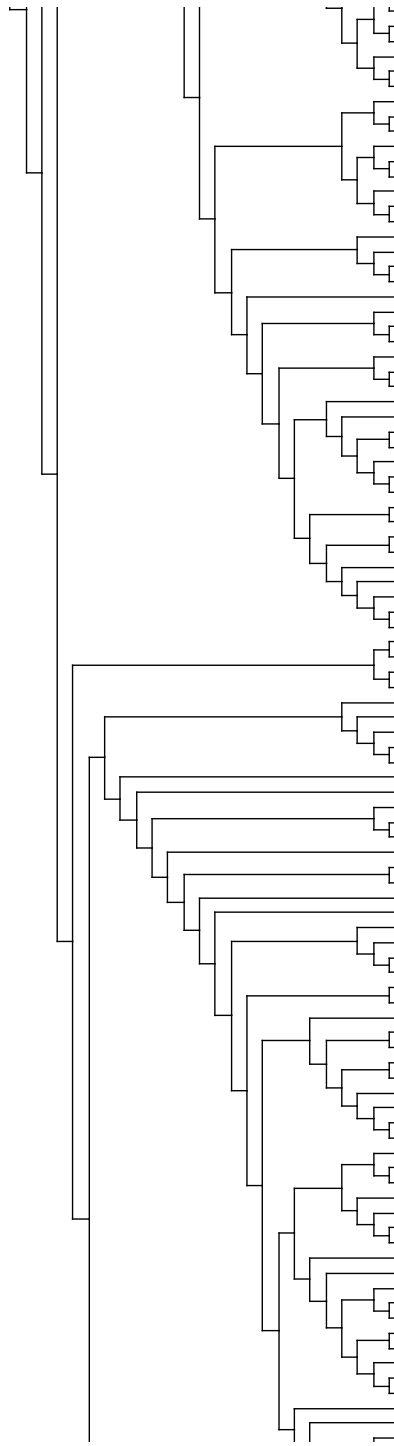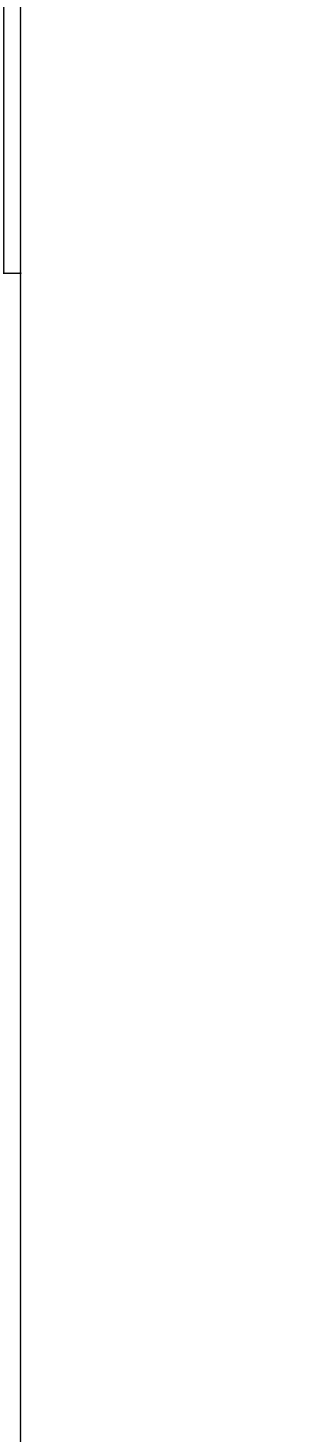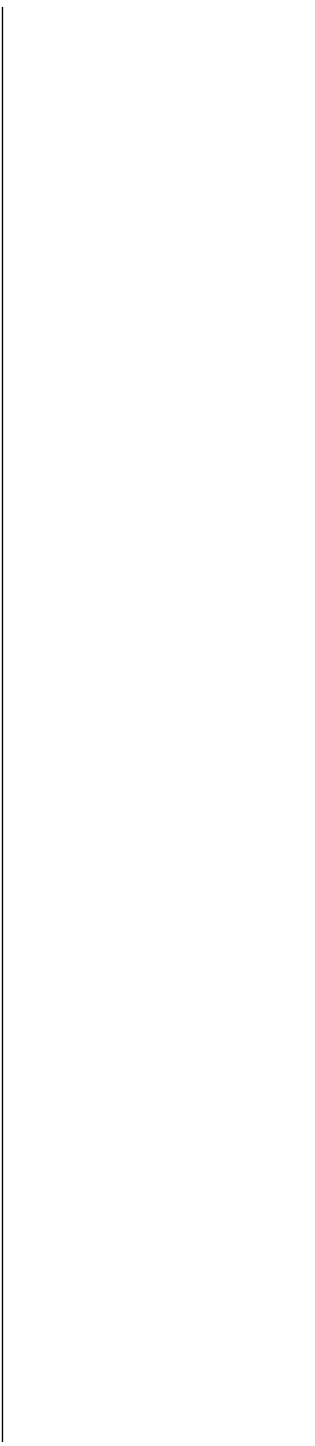

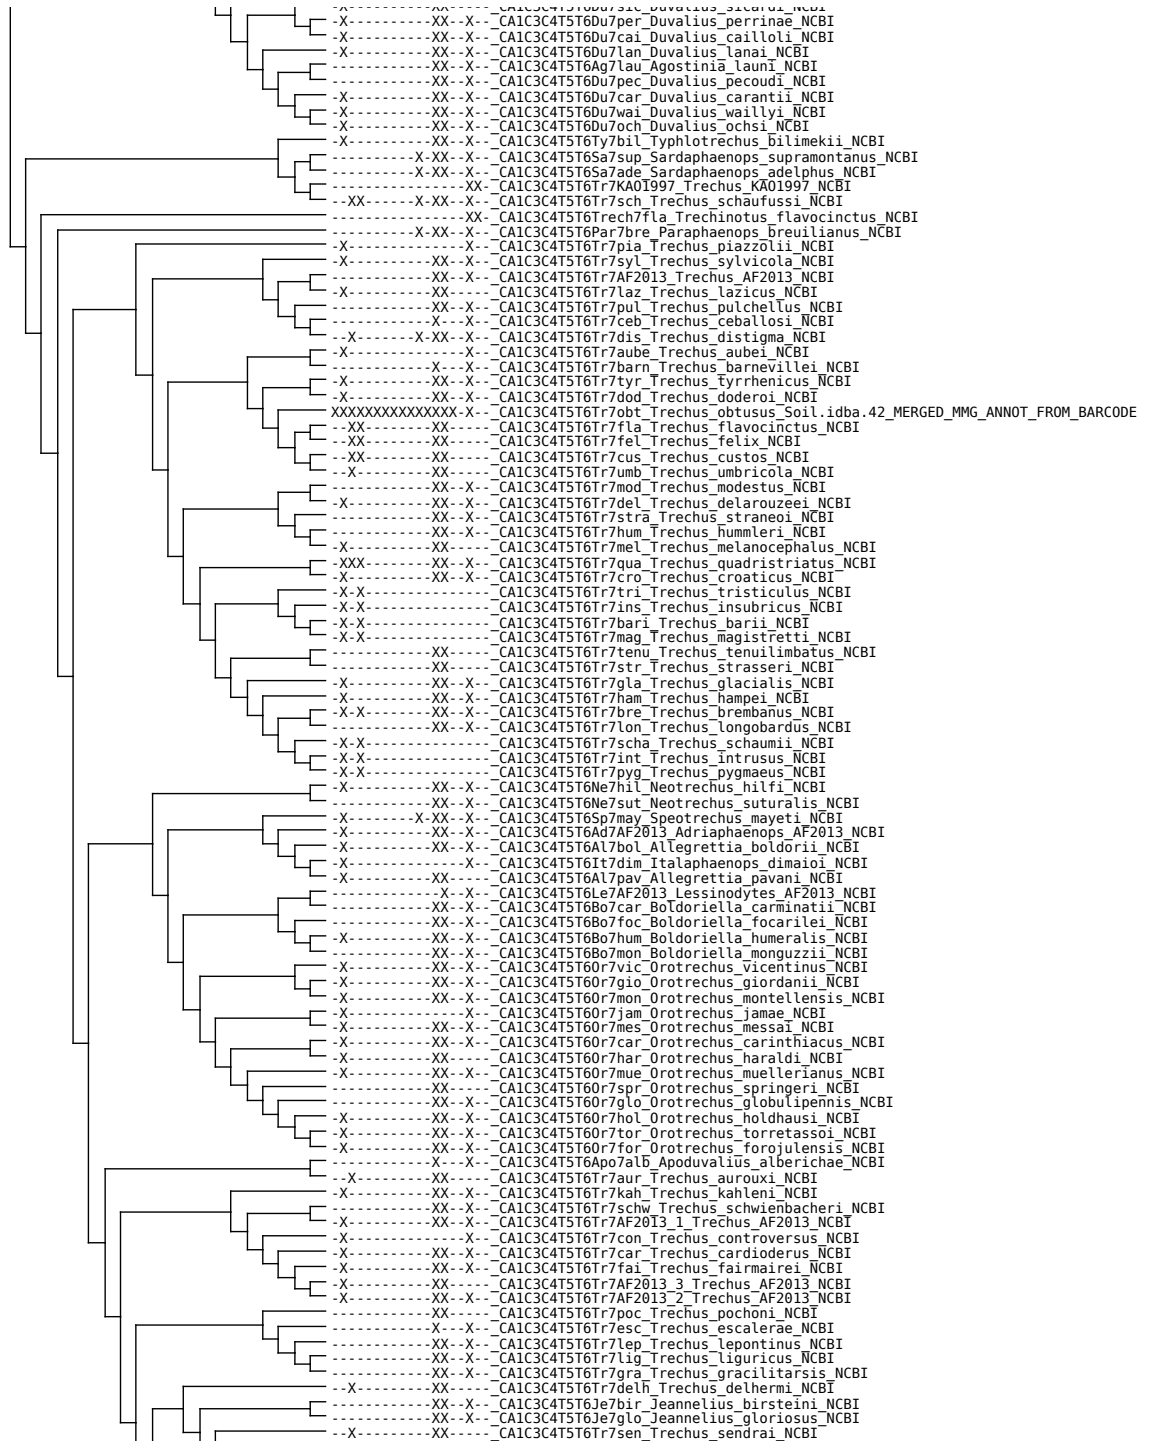

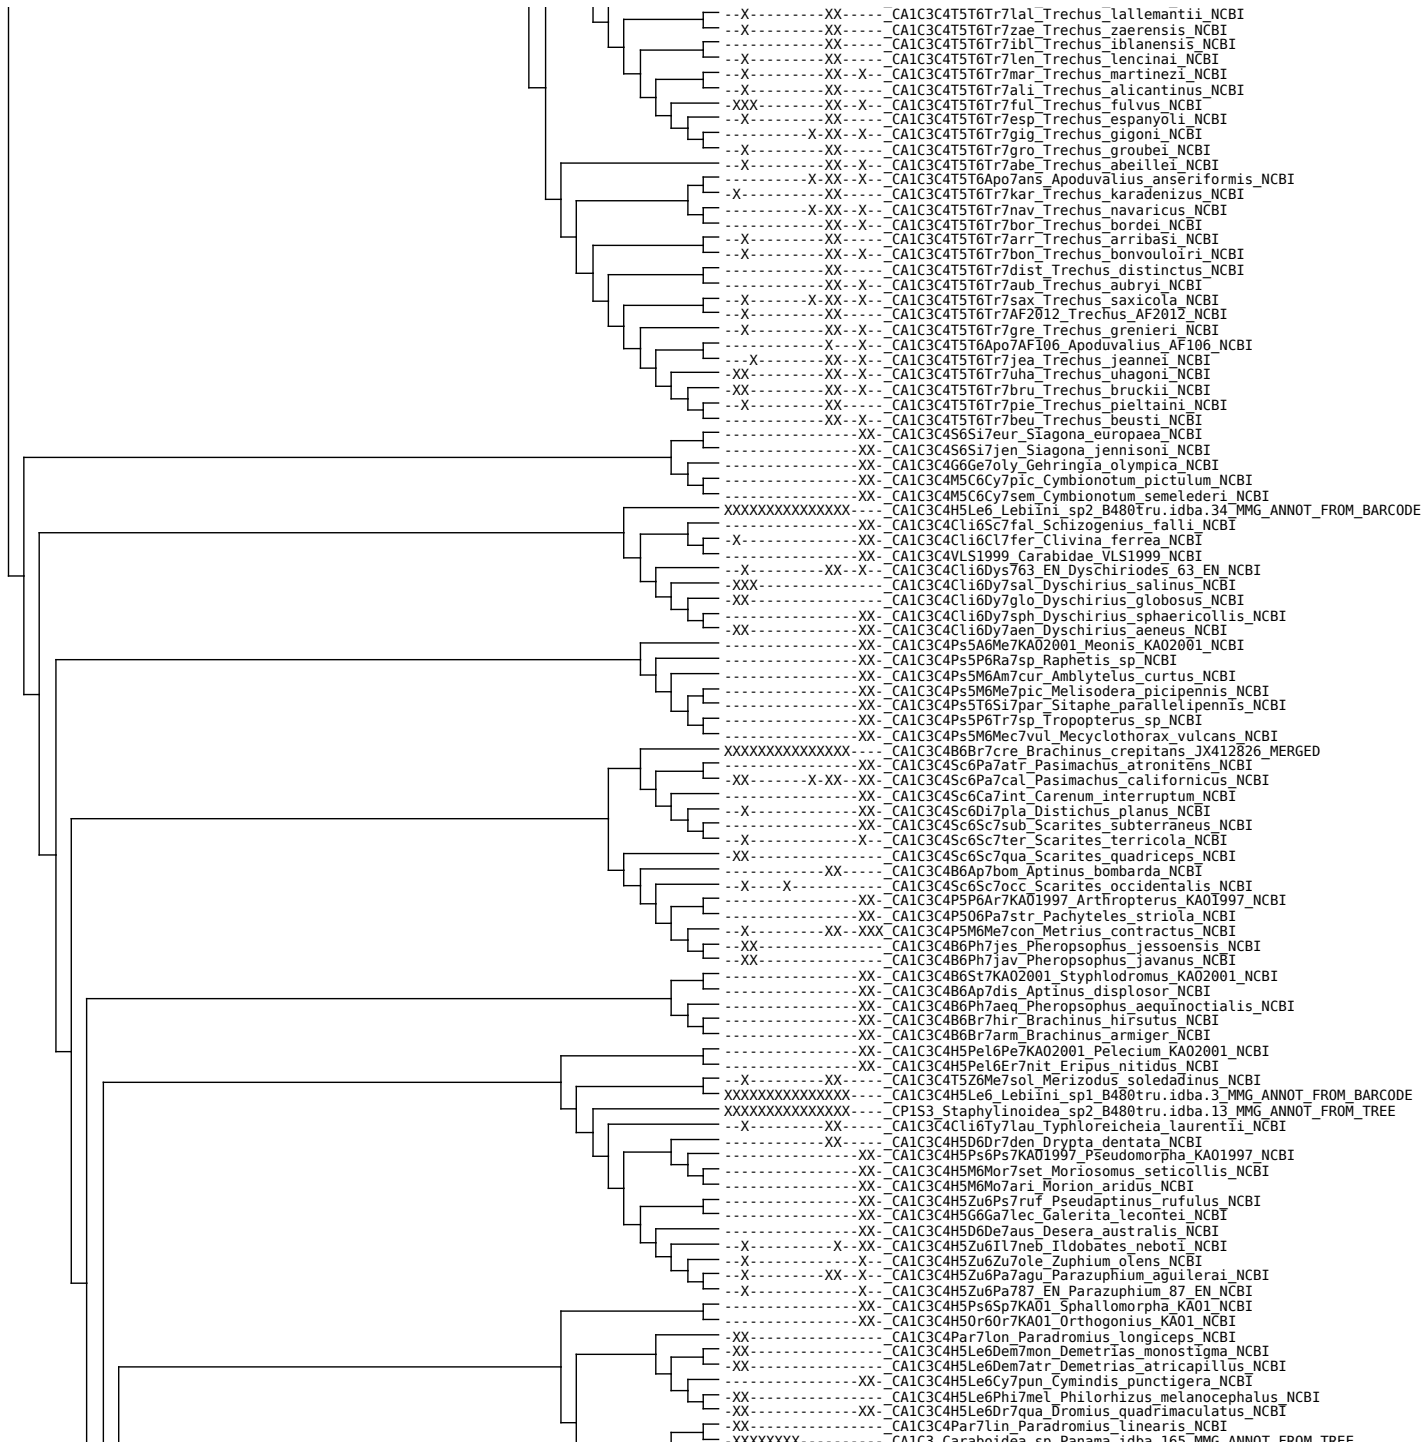

CA1C3C4T5T6Tr7la1 Trechus\_lallemandii NCBI  
CA1C3C4T5T6Tr7zae Trechus\_zaeensis NCBI  
CA1C3C4T5T6Tr7ib1 Trechus\_iblanensis NCBI  
CA1C3C4T5T6Tr7len Trechus\_lencinaei NCBI  
CA1C3C4T5T6Tr7mar Trechus\_martinezii NCBI  
CA1C3C4T5T6Tr7ali Trechus\_alicantinus NCBI  
CA1C3C4T5T6Tr7ful Trechus\_fulvus NCBI  
CA1C3C4T5T6Tr7esp Trechus\_espanyoli NCBI  
CA1C3C4T5T6Tr7gig Trechus\_gigoni NCBI  
CA1C3C4T5T6Tr7gro Trechus\_groubei NCBI  
CA1C3C4T5T6Tr7abe Trechus\_abeillei NCBI  
CA1C3C4T5T6Apo7an5 Apoduvalius\_anseriformis NCBI  
CA1C3C4T5T6Tr7kar Trechus\_karadenizus NCBI  
CA1C3C4T5T6Tr7nav Trechus\_navaricus NCBI  
CA1C3C4T5T6Tr7bor Trechus\_bordei NCBI  
CA1C3C4T5T6Tr7arr Trechus\_arribasi NCBI  
CA1C3C4T5T6Tr7bon Trechus\_bonvouloiri NCBI  
CA1C3C4T5T6Tr7dist Trechus\_distinctus NCBI  
CA1C3C4T5T6Tr7aub Trechus\_aubryi NCBI  
CA1C3C4T5T6Tr7sax Trechus\_saxicola NCBI  
CA1C3C4T5T6Tr7AF2012 Trechus\_AF2012 NCBI  
CA1C3C4T5T6Tr7gre Trechus\_grenieri NCBI  
CA1C3C4T5T6Apo7AF106 Apoduvalius\_AF106 NCBI  
CA1C3C4T5T6Tr7jea Trechus\_jeannei NCBI  
CA1C3C4T5T6Tr7uha Trechus\_uhagioni NCBI  
CA1C3C4T5T6Tr7brn Trechus\_bruckii NCBI  
CA1C3C4T5T6Tr7pie Trechus\_pieltaini NCBI  
CA1C3C4T5T6Tr7beu Trechus\_beusti NCBI  
CA1C3C4S6S17eur Siagona\_europaea NCBI  
CA1C3C4S6S17jen Siagona\_jennisoni NCBI  
CA1C3C4G6G67oly Gehringia\_olympica NCBI  
CA1C3C4M5C6Cy7pic Cymbionotum\_pictulum NCBI  
CA1C3C4M5C6Cy7sem Cymbionotum\_semelederi NCBI  
XXXXXXXXXXXX CA1C3C4H5Le6 Lebiini\_sp2\_B480tru.idba.34 MMG\_ANNOT\_FROM\_BARCODE  
CA1C3C4Cli6Sc7fal Schizogenius\_falli NCBI  
CA1C3C4Cli6Cl7fer Clivina\_ferrea NCBI  
CA1C3C4VLS1999 Carabidae\_VLS1999 NCBI  
CA1C3C4Cli6Dys763 EN\_Dyschiriodes\_63\_EN NCBI  
CA1C3C4Cli6Dy7sal Dyschirius\_salinus NCBI  
CA1C3C4Cli6Dy7glo Dyschirius\_globosus NCBI  
CA1C3C4Cli6Dy7sph Dyschirius\_sphaericollis NCBI  
CA1C3C4Cli6Dy7aen Dyschirius\_aeneus NCBI  
CA1C3C4Ps5B6Me7KA02001 Meonis\_KA02001 NCBI  
CA1C3C4Ps5P6Ra7sp Raphetis\_sp NCBI  
CA1C3C4Ps5M6Am7cur Amblytelus\_curtus NCBI  
CA1C3C4Ps5M6Me7pic Melisodera\_picipennis NCBI  
CA1C3C4Ps5T6S17par Sitaphe\_parallelipennis NCBI  
CA1C3C4Ps5P6Tr7sp Tropopterus\_sp NCBI  
CA1C3C4Ps5M6Mec7vul Mecyclothorax\_vulcans NCBI  
XXXXXXXXXXXX CA1C3C4B6Br7cre Brachinus\_crepitans\_JX412826 MERGED  
CA1C3C4Sc6Pa7atr Pasimachus\_atronitens NCBI  
CA1C3C4Sc6Pa7cal Pasimachus\_californicus NCBI  
CA1C3C4Sc6Ca7int Carenum\_interruptum NCBI  
CA1C3C4Sc6Di7pla Distichus\_planus NCBI  
CA1C3C4Sc6Sc7sub Scarites\_subterraneus NCBI  
CA1C3C4Sc6Sc7ter Scarites\_terricola NCBI  
CA1C3C4Sc6Sc7qua Scarites\_quadriceps NCBI  
CA1C3C4B6Ap7bom Aptinus\_bombarda NCBI  
CA1C3C4Sc6Sc7occ Scarites\_occidentalis NCBI  
CA1C3C4Ps5P6Ar7KA01997 Arthropterus\_KA01997 NCBI  
CA1C3C4Ps5O6Pa7str Pachytyles\_striola NCBI  
CA1C3C4Ps5M6Me7con Metrius\_contractus NCBI  
CA1C3C4B6Ph7jes Pheropsophus\_jessoensis NCBI  
CA1C3C4B6Ph7jav Pheropsophus\_javanus NCBI  
CA1C3C4B6St7KA02001 Styphlodromus\_KA02001 NCBI  
CA1C3C4B6Ap7dis Aptinus\_displisor NCBI  
CA1C3C4B6Ph7aeq Pheropsophus\_aequinoctialis NCBI  
CA1C3C4B6Br7hir Brachinus\_hirsutus NCBI  
CA1C3C4B6Br7arm Brachinus\_armiger NCBI  
CA1C3C4H5Pel6Pe7KA02001 Peleciium\_KA02001 NCBI  
CA1C3C4H5Pel6Er7nit Eripus\_nitidus NCBI  
CA1C3C4T5Z6Me7sol Merizodus\_soledadinus NCBI  
XXXXXXXXXXXX CA1C3C4H5Le6 Lebiini\_sp1\_B480tru.idba.3 MMG\_ANNOT\_FROM\_BARCODE  
XXXXXXXXXXXX CP153\_Staphylinodea\_sp2\_B480tru.idba.13 MMG\_ANNOT\_FROM\_TREE  
CA1C3C4Cli6Ty7lau Typhloreicheia\_laurentii NCBI  
CA1C3C4H5D6Dr7den Drypta\_dentata NCBI  
CA1C3C4H5Ps6Ps7KA01997 Pseudomorpha\_KA01997 NCBI  
CA1C3C4H5M6Mor7set Moriosomus\_seticollis NCBI  
CA1C3C4H5M6Mo7ari Morion\_aridus NCBI  
CA1C3C4H5Zu6Ps7ruf Pseudaptinus\_rufulus NCBI  
CA1C3C4H5G6Ga7lec Galerita\_lecontei NCBI  
CA1C3C4H5D6De7aus Desera\_australis NCBI  
CA1C3C4H5Zu6Il7neB Ildobates\_neboti NCBI  
CA1C3C4H5Zu6Zu7ole Zuphium\_olens NCBI  
CA1C3C4H5Zu6Pa7agu Parazuphium\_aguileraei NCBI  
CA1C3C4H5Zu6Pa787 EN\_Parazuphium\_B7\_EN NCBI  
CA1C3C4H5Ps6Sp7KA01 Sphallomorpha\_KA01 NCBI  
CA1C3C4H5Or6Or7KA01 Orthogonius\_KA01 NCBI  
CA1C3C4Par7lon Paradromius\_longiceps NCBI  
CA1C3C4H5Le6Dem7mon Demetrius\_monostigma NCBI  
CA1C3C4H5Le6Dem7atr Demetrius\_atricapillus NCBI  
CA1C3C4H5Le6Cy7pun Cymindis\_punctigera NCBI  
CA1C3C4H5Le6Phi7me1 Philorhizus\_melanocephalus NCBI  
CA1C3C4H5Le6Dr7qua Dromius\_quadrimaculatus NCBI  
CA1C3C4Par7lin Paradromius\_linearis NCBI  
XXXXXXXXXXXX CA1C3\_Carabidae\_sp\_Baena\_idba.165 MMG\_ANNOT\_EDRM\_TREE

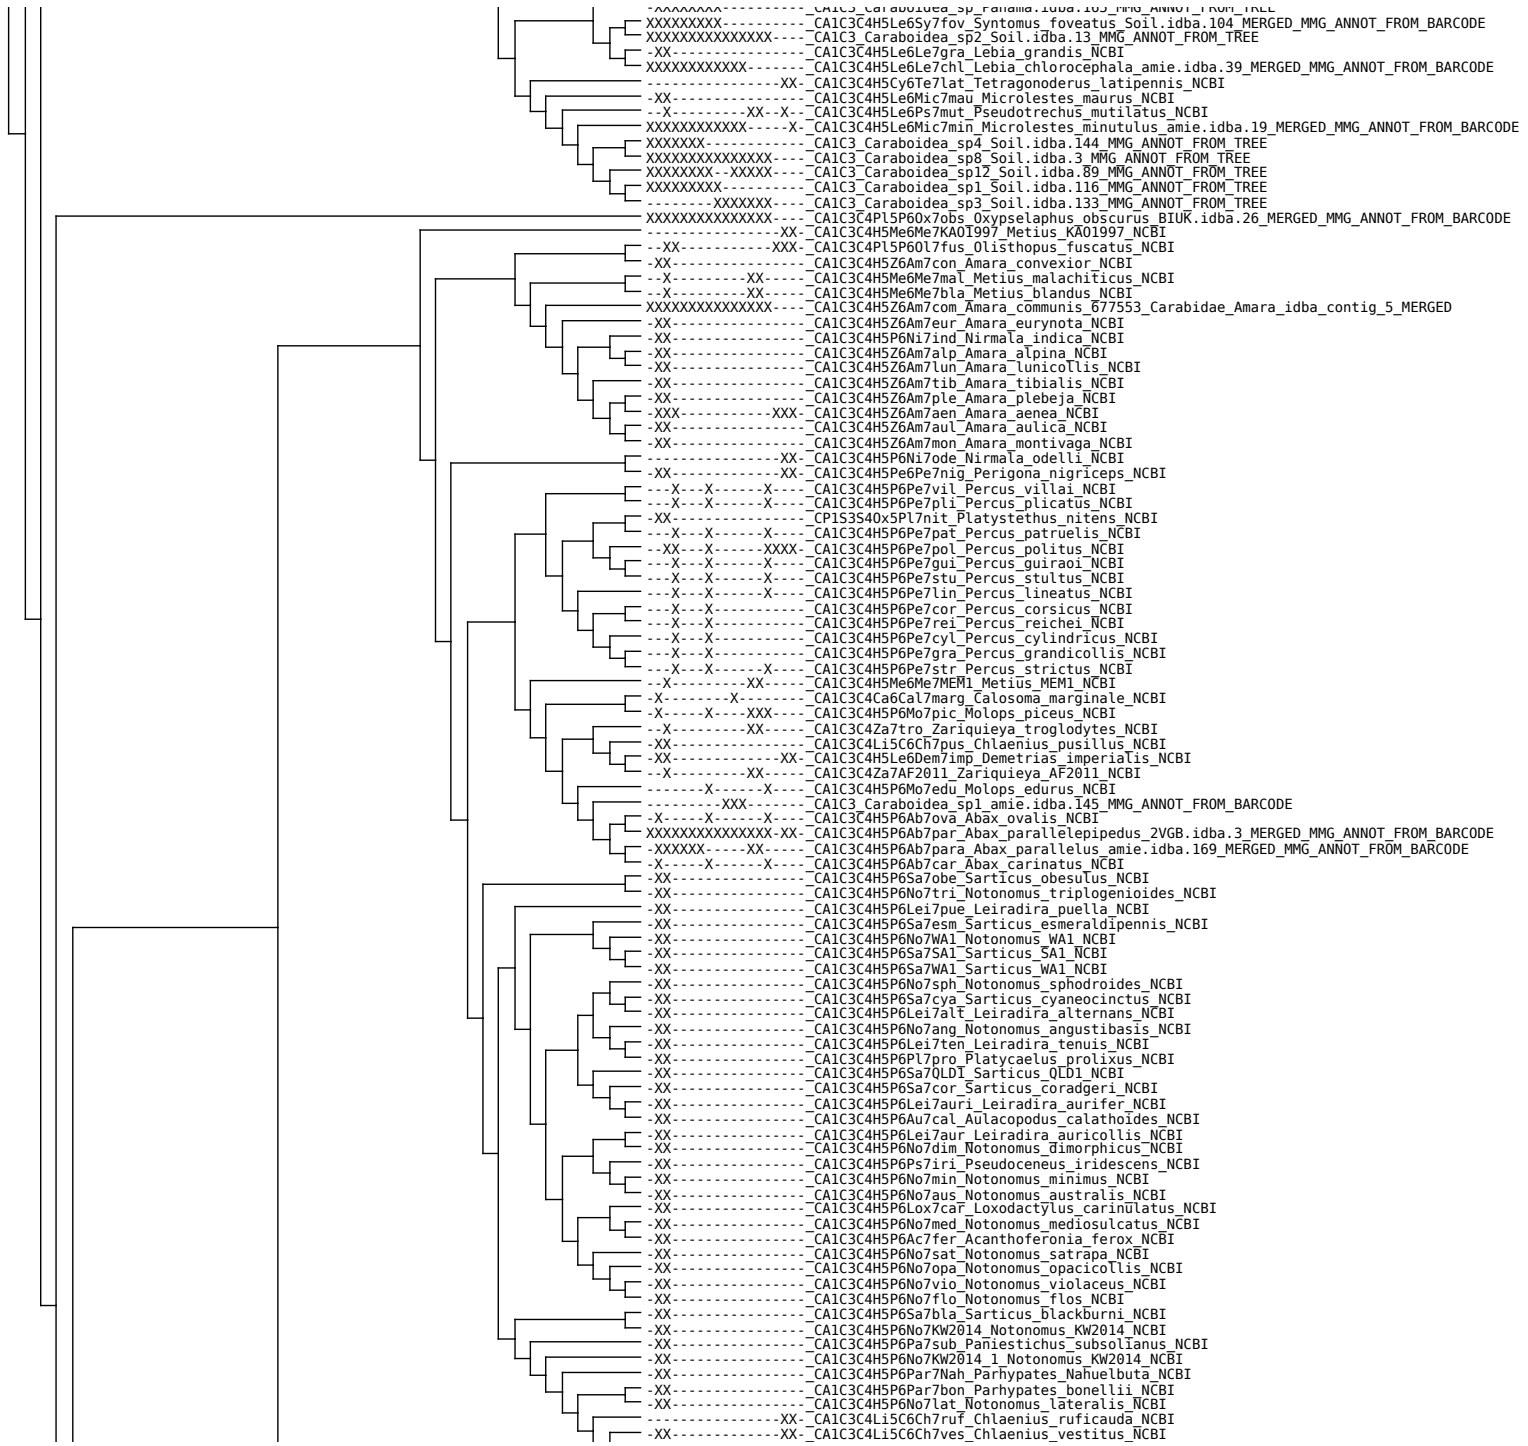



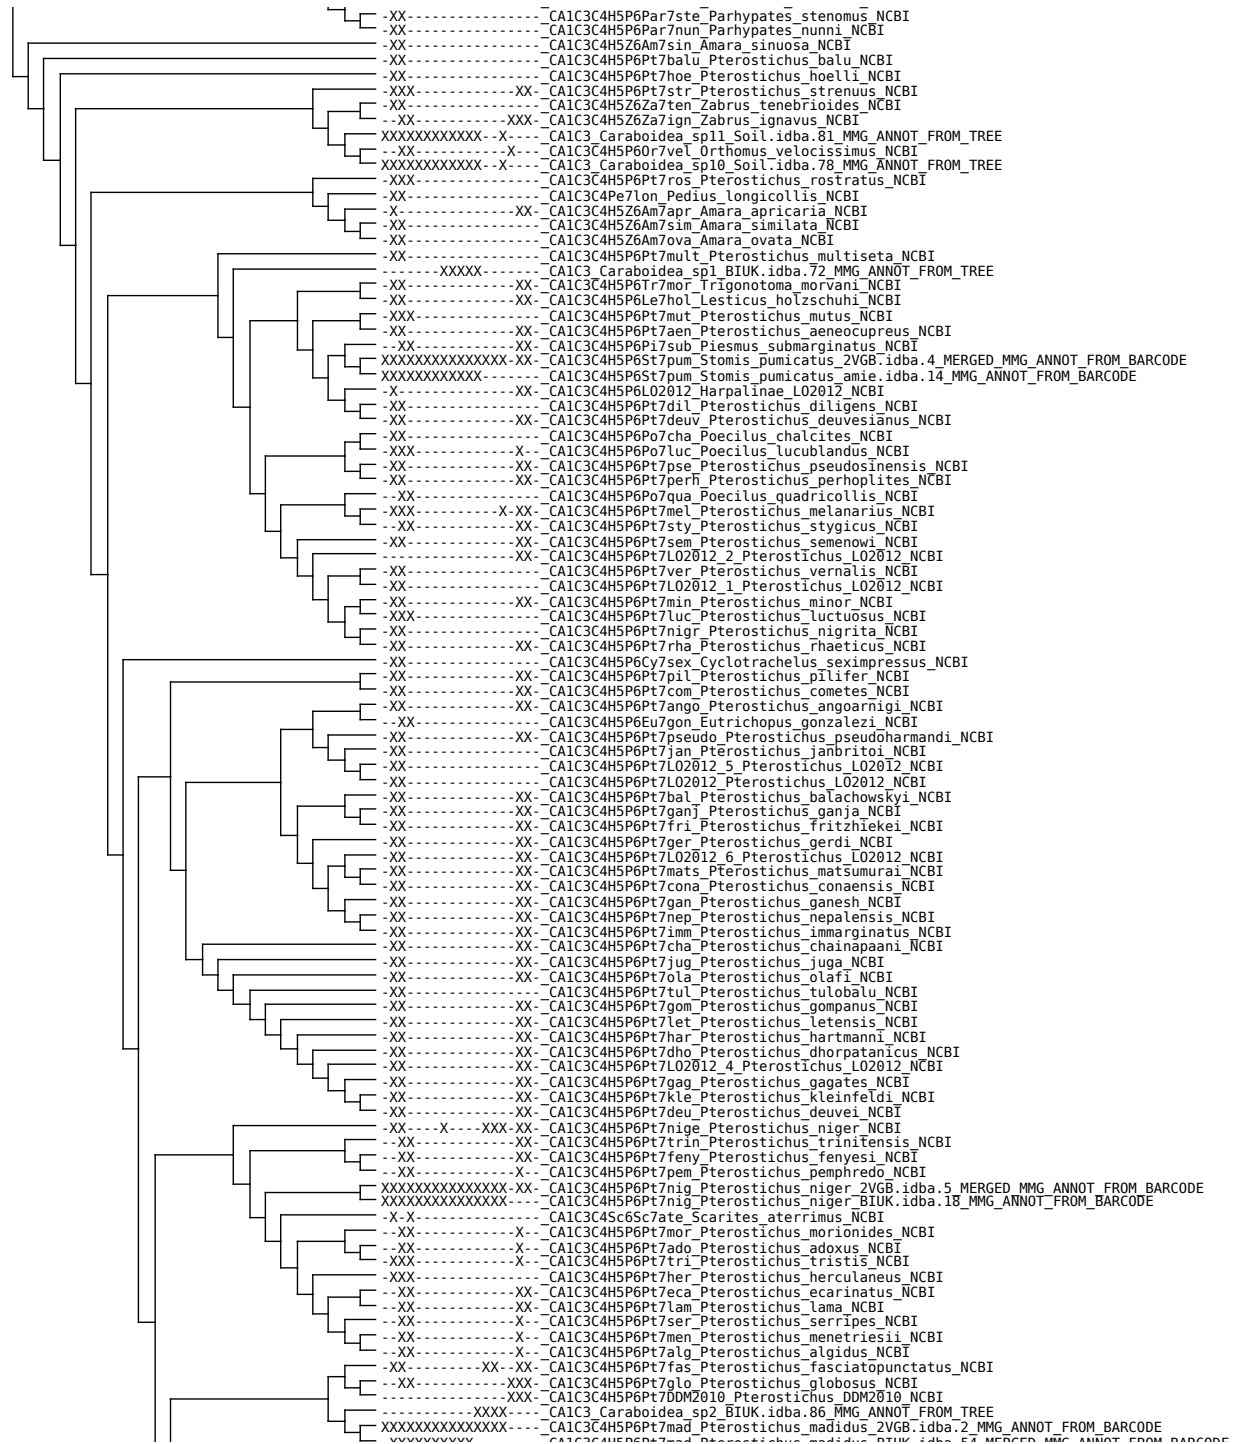

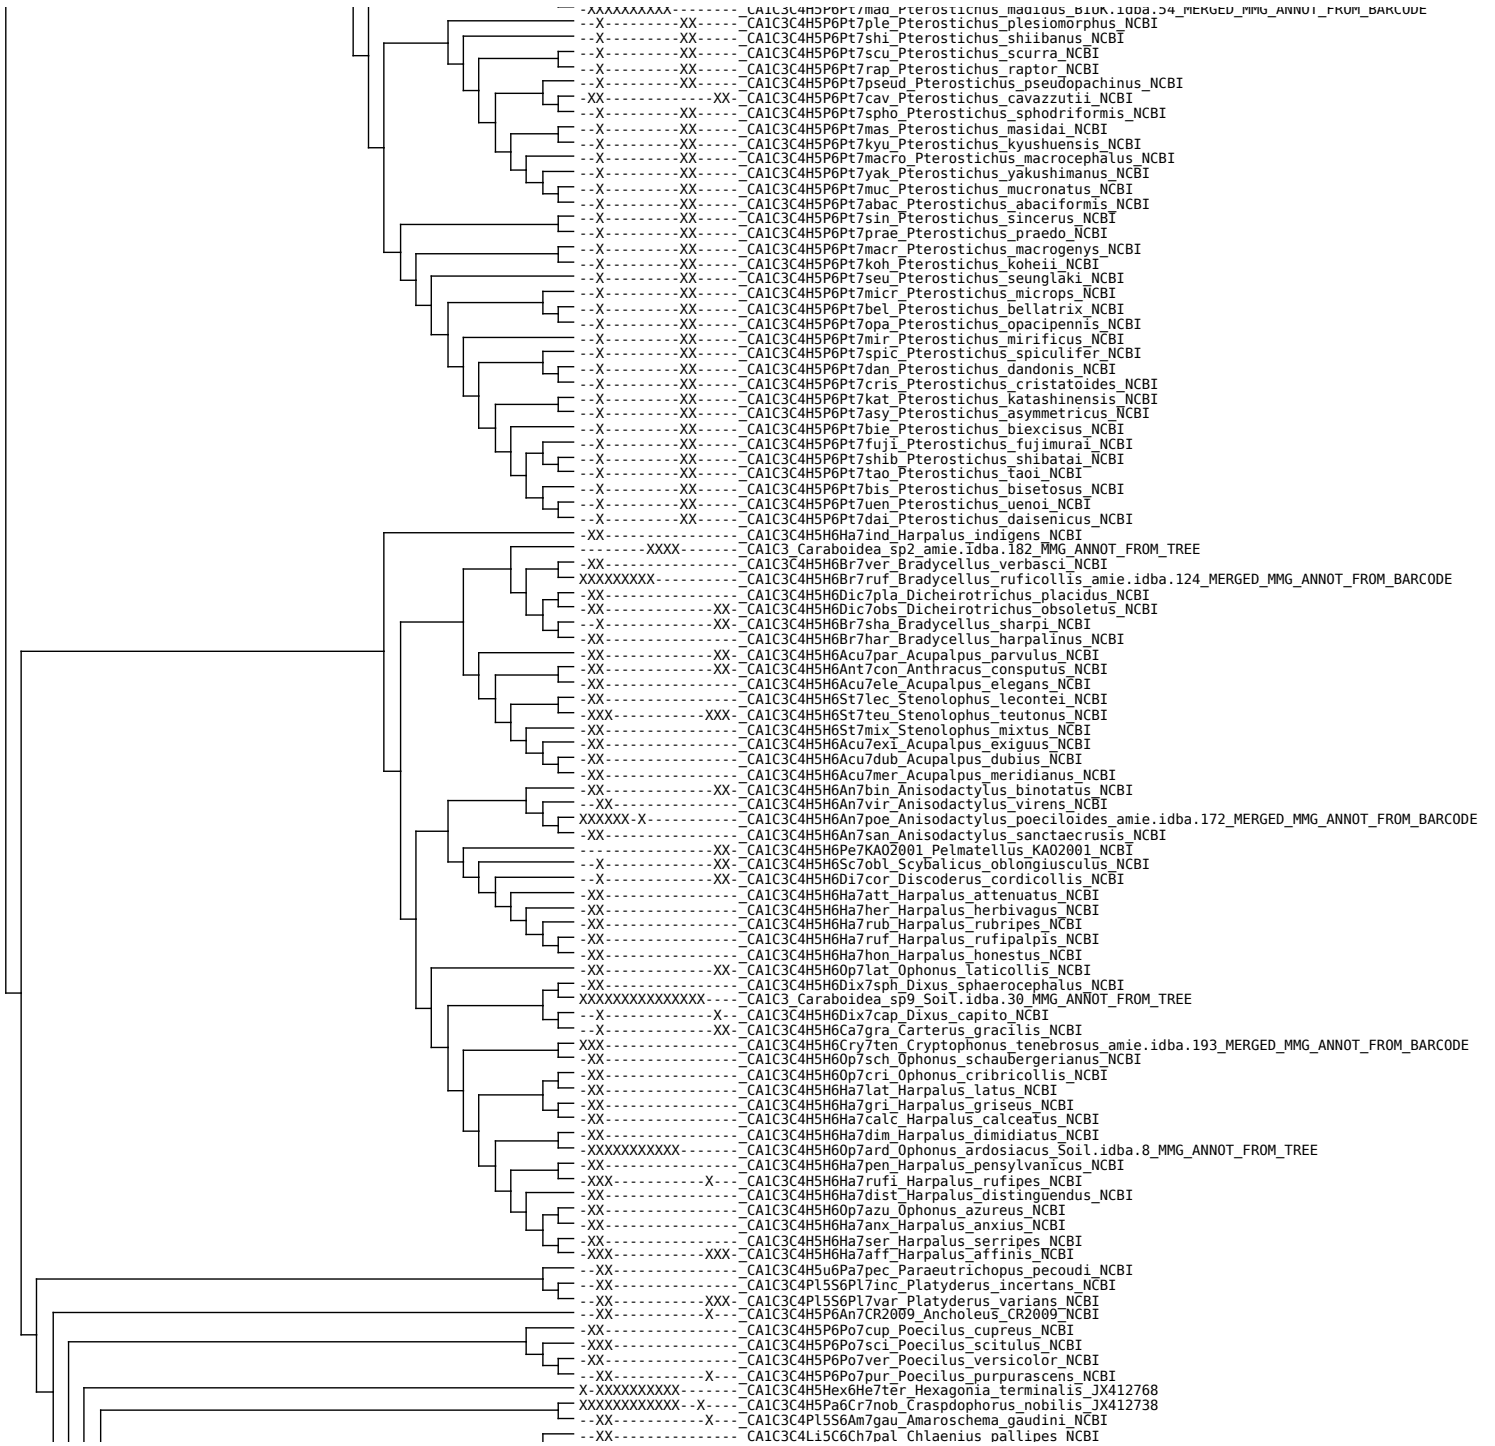

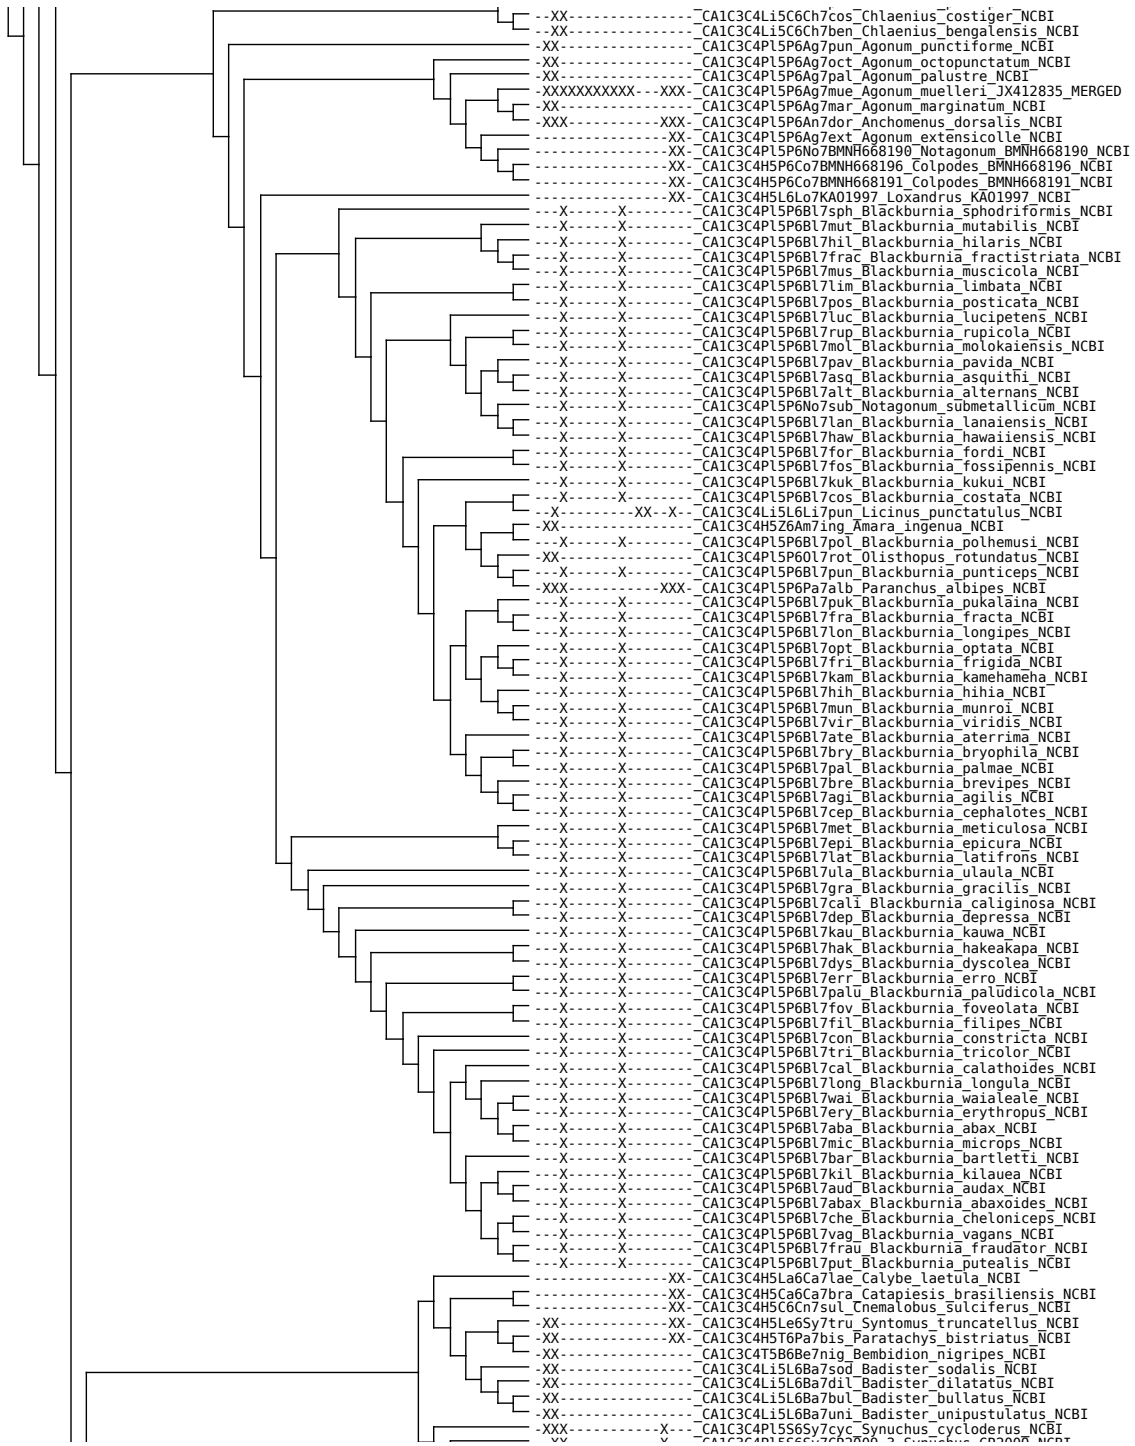

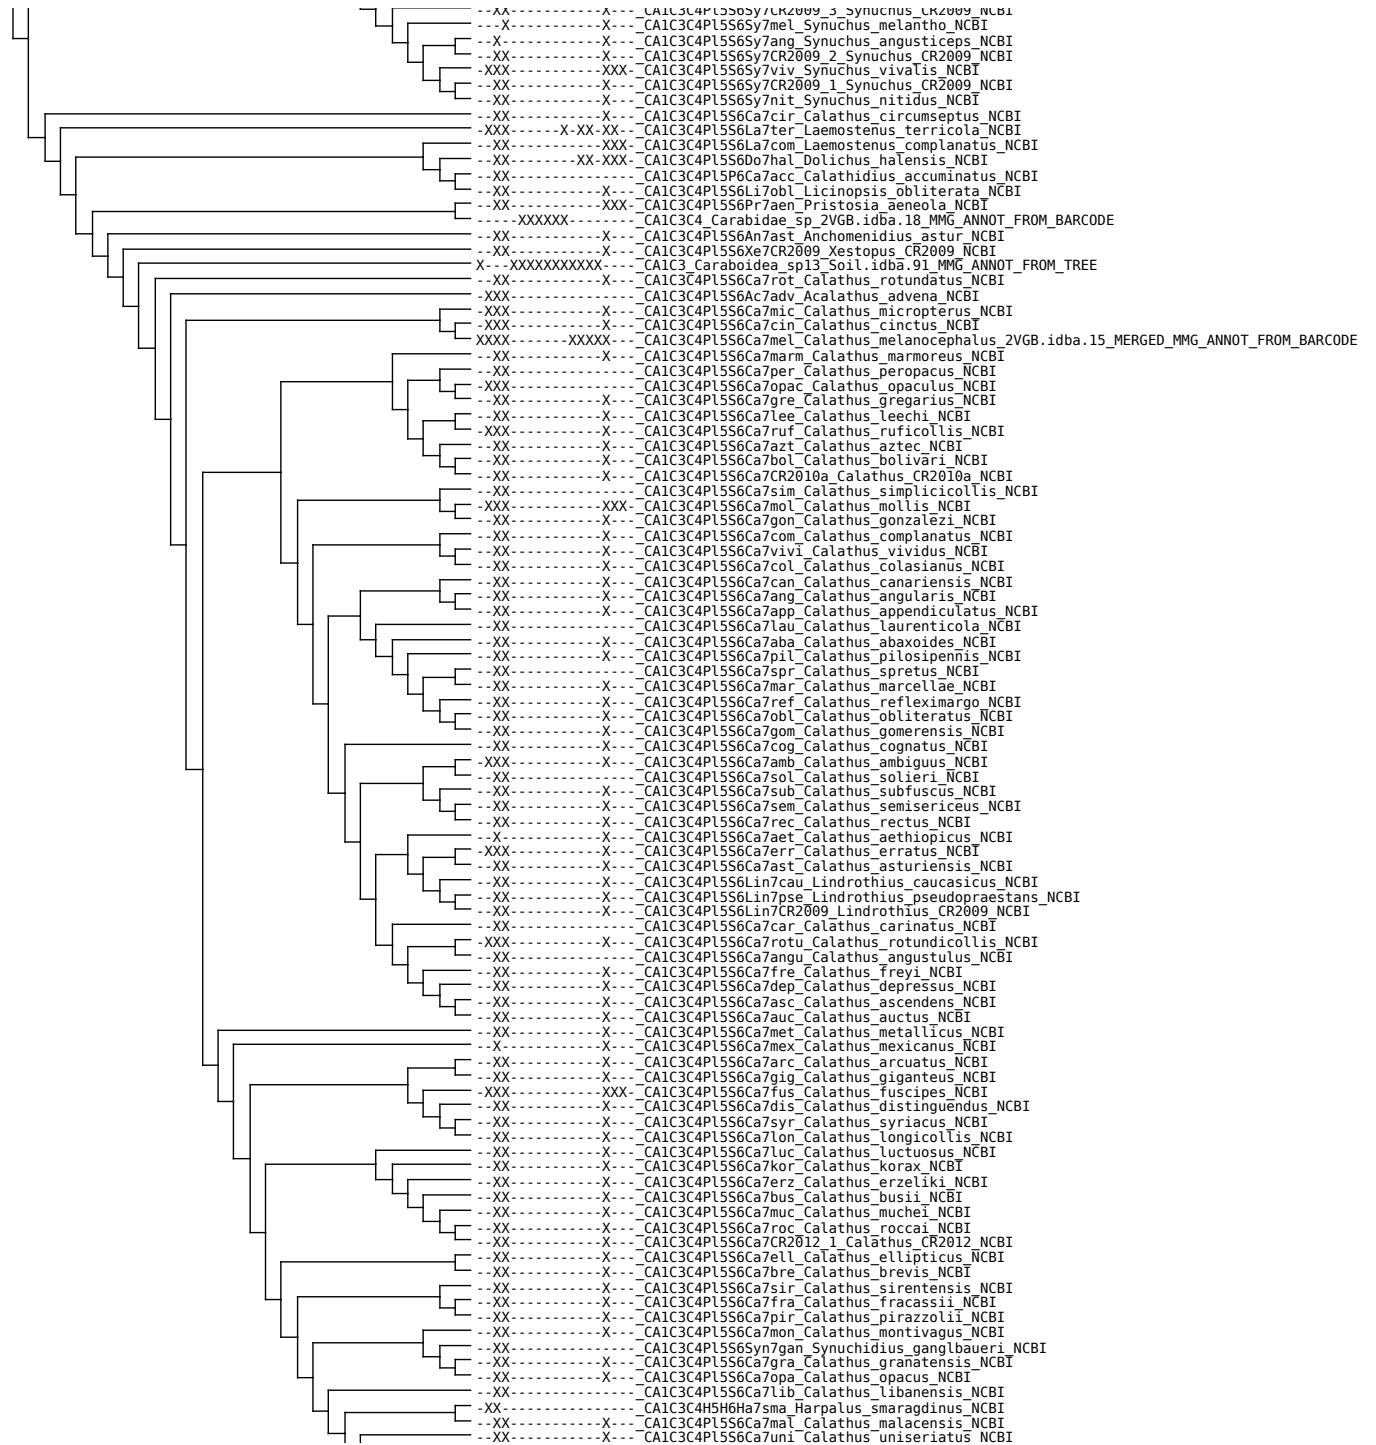

--XX-----X--\_CA1C3C4P15S6Ca7vui\_Calathus\_vuillefroyi\_NCBI  
--X-----X--\_CA1C3C4P15S6Ca7min\_Calathus\_minutus\_NCBI  
--XX-----X--\_CA1C3C4P15S6Ca7his\_Calathus\_hispanicus\_NCBI  
--XX-----X--\_CA1C3C4P15S6Ca7bae\_Calathus\_baeticus\_NCBI  
--XX-----X--\_CA1C3C4P15S6Ca7ore\_Calathus\_oreades\_NCBI  
--XX-----X--\_CA1C3C4P15S6Ca7mir\_Calathus\_mirei\_NCBI  
--XX-----X--\_CA1C3C4P15S6Ca7mor\_Calathus\_moralesi\_NCBI  
--XX-----X--\_CA1C3C4P15S6Ca7viv\_Calathus\_vivesi\_NCBI  
--X-----X--\_CP1De3Pe7tub\_Peltastica\_tuberculata\_NCBI  
--XX-----XX--\_CP1De3De7ema\_Derodontus\_emaculatus\_NCBI  
--X-----X--\_CP1De3De7mac\_Derodontus\_maculatus\_NCBI  
--X-----X--\_CP1De3La7lat\_Laricobius\_laticollis\_NCBI  
--X-----X--\_CP1De3La7rub\_Laricobius\_rubidus\_NCBI  
--X-----X--\_CP1De3La7nig\_Laricobius\_nigrinus\_NCBI  
--XX-----X--\_CP1Ch3C4G5A6Alt7MS2009\_Altica\_MS2009\_NCBI  
--XX-----XX-XXXX-CP1De3La7eri\_Laricobius\_erichsoni\_NCBI  
--X-----X--\_CP1De3La7cau\_Laricobius\_caucasicus\_NCBI  
--X-----X--\_CP1De3La7kan\_Laricobius\_kangdingensis\_NCBI  
--X-----X--\_CP1De3La7osa\_Laricobius\_osakensis\_NCBI  
--XXXX-CP1Sci3D4De7rel\_Declinia\_relicta\_NCBI  
--XX-----X--\_CP1Sci3S4Ch7huo\_Chameleoscyphon\_huonensis\_NCBI  
--XX-----X--\_CP1Sci3S4Yp7Cow\_Ypsiloncyphon\_CowBay\_NCBI  
--X-----X--\_CP1Sci3S4Co7McL\_Contacyphon\_McLeodCK\_NCBI  
--X-----X--\_CP1Sci3S4Od7ino\_Odeles\_inornata\_NCBI  
--XX-----X--\_CP1Sci3S4Hy7sat\_Hydrocyphon\_satoui\_NCBI  
--XX-----X-XX-X-CP1Sci3S4M17tes\_Microcara\_testacea\_NCBI  
--X-----X--\_CP1Sci3S4E17tri\_Elodes\_tricuspis\_NCBI  
XXXXXXXXXXXX--X--\_CP1Sci3S4E17min\_Elodes\_minuta\_mIe.idba.24\_MERGED\_MMG\_ANNOT\_FROM\_BARCODE  
--XX-----X--\_CP1Sci3S4E17ma\_Elodes\_marginata\_NCBI  
--XX-----X--\_CP1Sci3S4Pr7yar\_Prionocyphon\_yarfaensis\_NCBI  
--XX-----X--\_CP1Sci3S4Pr7kur\_Prionocyphon\_kurandaensis\_NCBI  
--XX-----X--\_CP1Sci3S4Pr7nig\_Prionocyphon\_niger\_NCBI  
--XX-----X--\_CP1Sci3S4Pr7war\_Prionocyphon\_warra\_NCBI  
--XX-----X--\_CP1Sci3S4Pr7dea\_Prionocyphon\_deanboltoi\_NCBI  
--XX-----X--\_CP1Sci3S4Pr7won\_Prionocyphon\_wongabel\_NCBI  
--X-----X--\_CP1Sci3S4Da7lam\_Daploeuross\_lamingtonensis\_NCBI  
--XX-----X--\_CP1Sci3S4Ps7dec\_Pseudomicrocara\_decipiens\_NCBI  
--XX-----X--\_CP1Sci3S4Pr7cae\_Prionocyphon\_caementum\_NCBI  
--X-----XXXX-CP1Sci3S4RK0167\_Scirtidae\_RK0167\_NCBI  
XXXXXXXXXXXX--842687\_Psephenidae\_sp\_idba\_contig\_4  
--XXXXX-CP1Sci3\_Scirtioidea\_sp\_B480tru.idba.154\_MMG\_ANNOT\_FROM\_TREE  
--XXXXXXXXXX-CP1Sci3S4\_Scirtidae\_sp\_JX412785  
--XX-----X--\_CP1Sci3S4Co7pal\_Contacyphon\_palustris\_NCBI  
--XX-----X--\_CP1Sci3S4Pet7mes\_Petrocyphon\_messatos\_NCBI  
--XX-----X--\_CP1Sci3S4Pet7ant\_Petrocyphon\_antarcticus\_NCBI  
--X-----XX-XXX-CP1Sci3S4R01321\_Scirtioidea\_R01321\_NCBI  
--XX-----XX-XXX-CP1Sci3S4R0147\_Scirtioidea\_RK0147\_NCBI  
--X-----X--\_CP1Sci3S4Sc7emm\_Scirtes\_emmae\_NCBI  
--X-----XX-XXX-CP1Sci3S4Sc7RK0160\_Scirtes\_RK0160\_NCBI  
--XX-----XX-XXX-CP1Sci3S4Sc7hem\_Scirtes\_hemisphaericus\_NCBI  
--XX-----X--\_CP1Sci3S4Sc7hae\_Scirtes\_haemisphaericus\_NCBI  
XXXXXXXXXXXX--CP1Sci3S4Sc7orb\_Scirtes\_orbicularis\_mIe.idba.100\_MERGED\_MMG\_ANNOT\_FROM\_BARCODE  
--XX-----XX-CP1Sci3S4UP0L002213\_Scirtidae\_UP0L002213\_NCBI  
XXXXXXXXXXXX--CP1Sci3S4Sc7Scirtes\_sp2\_B480tru.idba.50\_MMG\_ANNOT\_FROM\_BARCODE  
--X-----XX-XXX-CP1Sci3S4RK0162\_Scirtidae\_RK0162\_NCBI  
--X-----XX-XXX-CP1Sci3S4RK0165\_Scirtidae\_RK0165\_NCBI  
--X-----XXX-CP1Sci3RK0159\_Scirtioidea\_RK0159\_NCBI  
--XX-----X--\_CP1Sci3S4Sc7pin\_Scirtes\_pinjarraensis\_NCBI  
--XX-----X--\_CP1Sci3S40r7flo\_Ora\_floccosa\_NCBI  
--XX-----X--\_CP1Sci3S4Sc7exo\_Scirtes\_exoletus\_NCBI  
--XX-----X--\_CP1Sci3S4Sc7mic\_Scirtes\_microrotundus\_NCBI  
--XX-----X--\_CP1Sci3S4Sc7int\_Scirtes\_interstinctus\_NCBI  
--XX-----X--\_CP1Sci3S4Sc7bri\_Scirtes\_brisbanensis\_NCBI  
--XX-----X--\_CP1Sci3S4Ex7ruf\_Exochomoscirtes\_ruforotundus\_NCBI  
--XX-----X--\_CP1Sci3S4Ps7cin\_Pseudomicrocara\_cincta\_NCBI  
--XX-----X--\_CP1Sci3S4Ps7New\_Pseudomicrocara\_NewEngNP\_NCBI  
--XX-----X--\_CP1Sci3S4Ps7han\_Pseudomicrocara\_hangayi\_NCBI  
--XX-----X--\_CP1Sci3S4Ps7par\_Pseudomicrocara\_parva\_NCBI  
--X-----X--\_CP1Sci3S4Ps7CW227\_Pseudomicrocara\_CW227\_NCBI  
--XX-----X--\_CP1Sci3S4Ps7vari\_Pseudomicrocara\_variegata\_NCBI  
--XX-----X--\_CP1Sci3S4Ps7CW231\_Pseudomicrocara\_CW231\_NCBI  
--XX-----X--\_CP1Sci3S4Ma7cra\_Macrohelodes\_crassus\_NCBI  
--XX-----XX-CP1Sci3S4Pr7dis\_Prionocyphon\_discoideus\_NCBI  
--X-----XX-XXX-CP1Sci3S4Pr7sex\_Prionocyphon\_sexmaculatus\_NCBI  
--X-----X--\_CP1Sci3S4Ps7dav\_Pseudomicrocara\_davidsoni\_NCBI  
--XX-----X--\_CP1Sci3S4Ps7des\_Pseudomicrocara\_desraeei\_NCBI  
--XX-----X--\_CP1Sci3S4Ps7ori\_Pseudomicrocara\_orientalis\_NCBI  
--XX-----X--\_CP1Sci3S4Ps7Str\_Pseudomicrocara\_Strathblane\_NCBI  
--XX-----X--\_CP1Sci3S4Ps7spi\_Pseudomicrocara\_splota\_NCBI  
--XX-----X--\_CP1Sci3S4Ps7ant\_Pseudomicrocara\_anthophilis\_NCBI  
--XX-----X--\_CP1Sci3S4Pr7ser\_Prionocyphon\_serricornis\_NCBI  
XXXXXXXXXXXX-CP1Sci3S4\_Scirtidae\_sp\_JX412728  
--XX-----X--\_CP1Sci3S4Het7aus\_Heterocyphon\_australis\_NCBI  
--XX-----X--\_CP1Sci3S4Ma7thu\_Macrohelodes\_thunguttiensis\_NCBI  
--XX-----X--\_CP1Sci3S4Ma7spi\_Macrohelodes\_spinapennis\_NCBI  
--XX-----X--\_CP1Sci3S4Ma7Luc\_Macrohelodes\_lucidus\_NCBI  
--XX-----X--\_CP1Sci3S4Pe7CW400\_Peneveronatus\_CW400\_NCBI  
--XX-----X--\_CP1Sci3S4Pe7mac\_Peneveronatus\_macedonensis\_NCBI  
--XX-----X--\_CP1Sci3S4Ps7ang\_Pseudomicrocara\_angulata\_NCBI  
--XX-----X--\_CP1Sci3S4Het7mon\_Heterocyphon\_montanus\_NCBI  
--XX-----X--\_CP1Sci3S4Het7dec\_Heterocyphon\_decussatus\_NCBI  
--XX-----X--\_CP1Sci3S4Het7tri\_Heterocyphon\_triangularis\_NCBI  
--XX-----X--\_CP1Sci3S4Het7kei\_Heterocyphon\_keiraensis\_NCBI  
--XX-----X--\_CP1Sci3S4Het7elo\_Heterocyphon\_elongatus\_NCBI  
--XX-----X--\_CP1Sci3S4He7obs\_Herthania\_obscurata\_NCBI

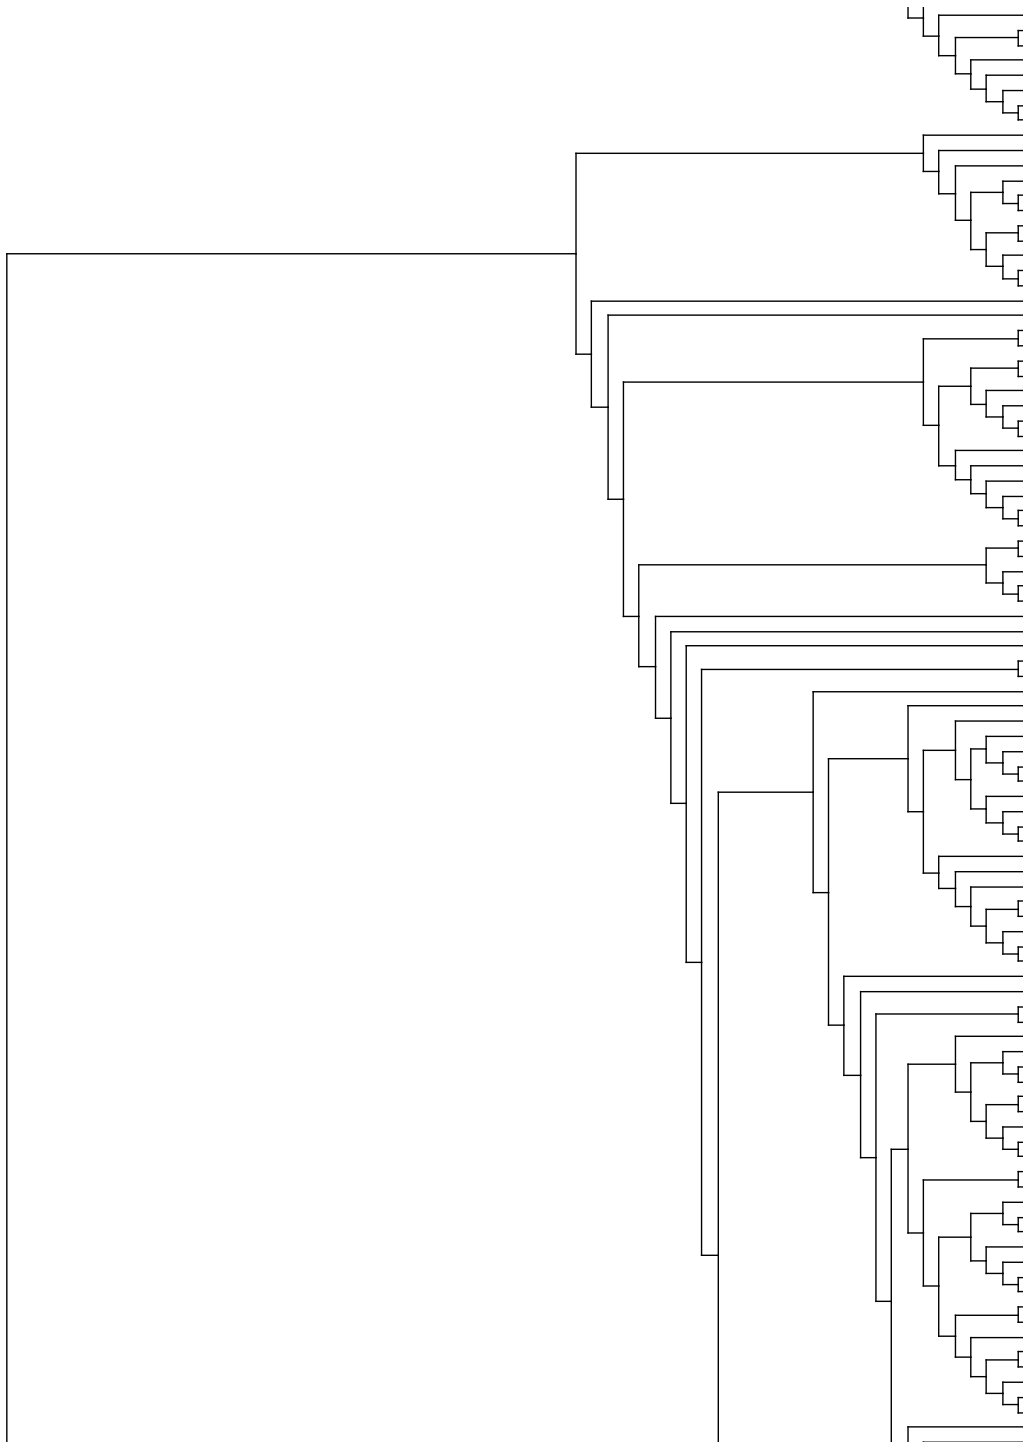

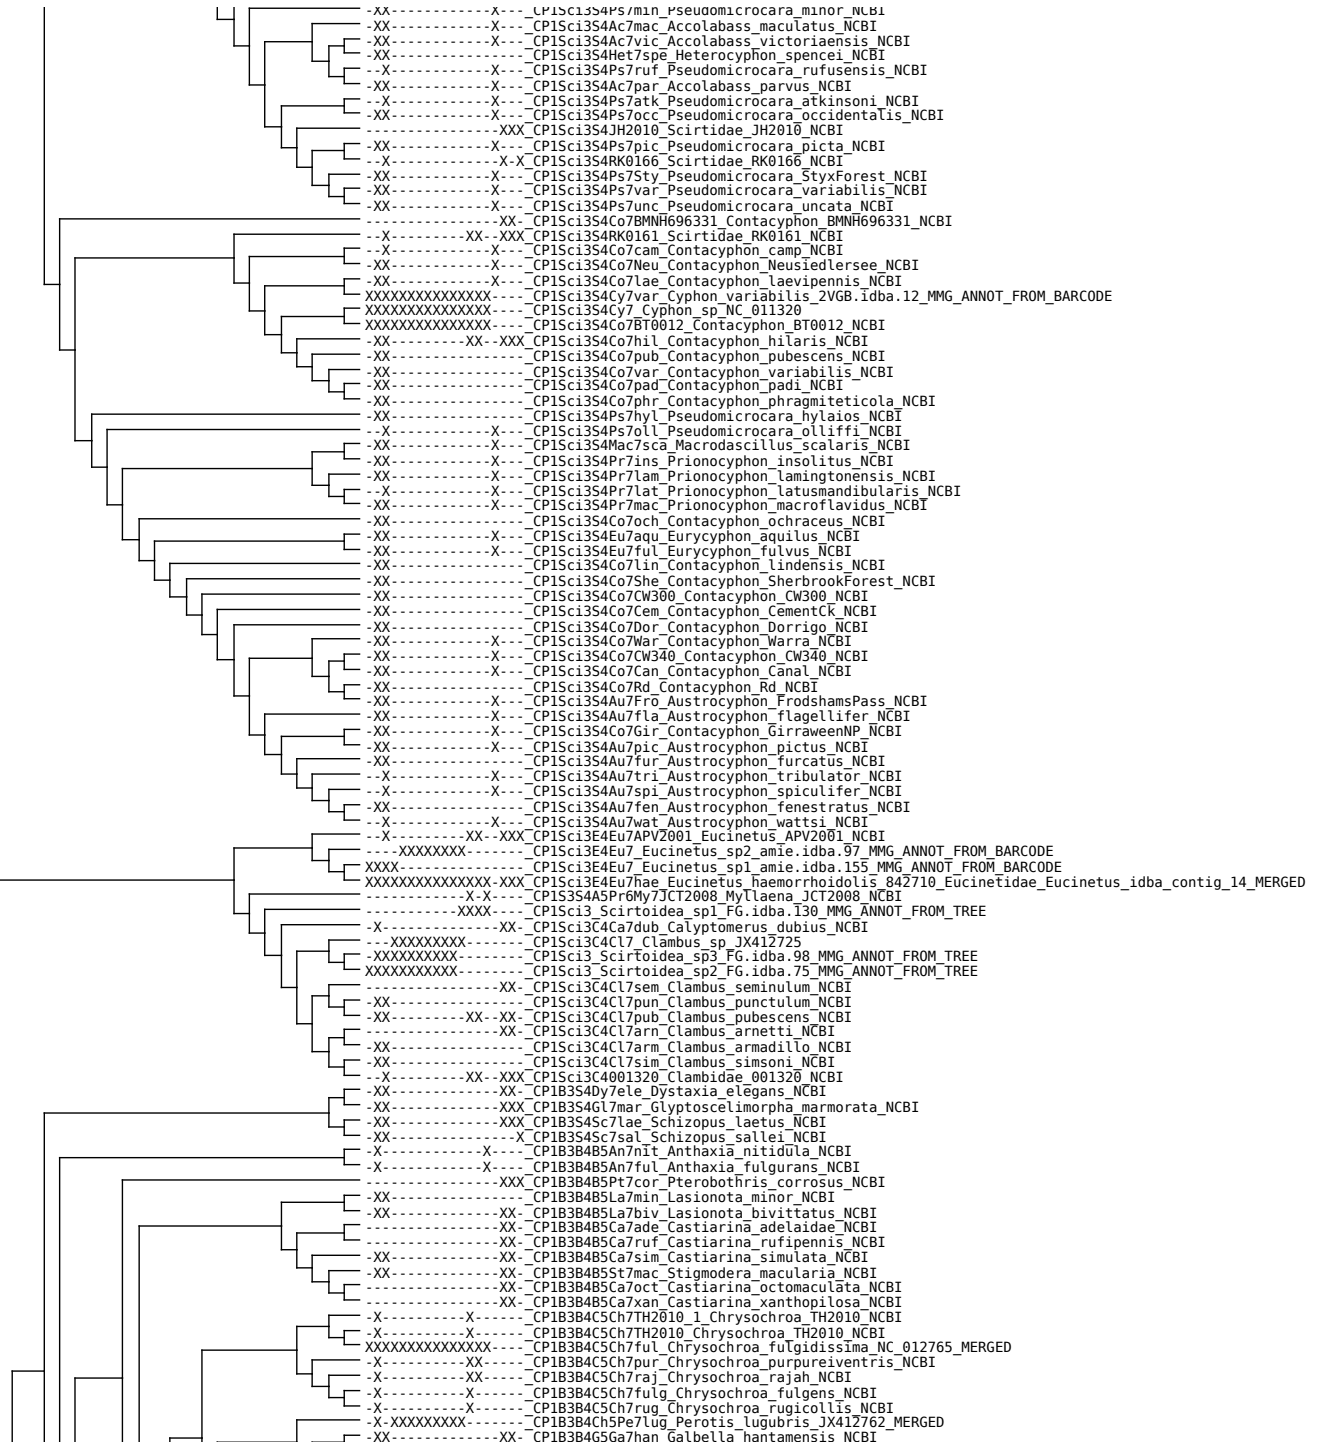

-XX-----X\_CP1B3B4G5Ga7BUP0127 Galbella\_BUP0127 NCBI  
-X-----XX\_CP1B3B4B5Th7cra Thomassetia\_crassa NCBI  
-XX-----XXX\_CP1B3B4B5Au7sch Augrabies\_schotiaphaga NCBI  
-XX-----XX\_CP1B3B4B5Tr7blo Trachykele\_blondeii NCBI  
-XX-----XX\_CP1B3B4B5Tr7BUP0280 Trachykele\_BUP0280 NCBI  
-XX-----XX\_CP1B3B4Ch5Em7pat Embrikillium\_patricium NCBI  
-XX-----XX\_CP1B3B4B5Ag7gig Agaeocera\_gigas NCBI  
-XX-----XX\_CP1B3B4B5Ju7bak Julodimorpha\_bakewelli NCBI  
-XX-----XX\_CP1B3B4Ch5Ev7gam Evides\_gambiensis NCBI  
-XX-----XX\_CP1B3B4Ch5Ep7cer Epidelus\_ceramensis NCBI  
-XX-----XX\_CP1B3B4Ch5Au7qua Austrophorella\_quadrisignata NCBI  
-XX-----XXX\_CP1B3B4Ch5Ch7ang Chalophora\_angulicollis NCBI  
-XX-----XXX\_CP1B3B4Ch5Na7bru Nanularia\_brunneata NCBI  
-XX-----X\_CP1B3B4Ch5Am7cyl Ampheremus\_cylindricollis NCBI  
-XX-----XX\_CP1B3B4B5Oa7nig Oaxacanthaxia\_nigroaenea NCBI  
-X-----XXX\_CP1B3B4Ch5Eu7gig Euchroma\_gigantea NCBI  
-X-----XX-XXX\_CP1B3B4J5IR2002 Julodinae\_IR2002 NCBI  
-XX-----XXX\_CP1B3B4J5Ju7rec Julodis\_recenta NCBI  
-XX-----XX\_CP1B3B4J5Ne7BUP0077 Neojulodis\_BUP0077 NCBI  
-XX-----XX\_CP1B3B4J5Ju7sul Julodis\_sulcicollis NCBI  
-XX-----XX\_CP1B3B4J5Ju7cir Julodis\_cirrosa NCBI  
-XX-----XX\_CP1B3B4J5Ne7BUP0079 Neojulodis\_BUP0079 NCBI  
-XX-----XX\_CP1B3B4J5Ne7BUP0078 Neojulodis\_BUP0078 NCBI  
-XX-----XXX\_CP1B3B4P5Po7aru Polycesta\_aruensis NCBI  
-XX-----XXX\_CP1B3B4P5Xy7cro Xyrosceles\_crociata NCBI  
-XX-----XXX\_CP1B3B4P5Ch7pla Chrysophana\_placida NCBI  
-XX-----XXX\_CP1B3B4P5As7irr Astraeus\_irregularis NCBI  
-XX-----XX\_CP1B3B4P5Th7amb Thrincoptyge\_ambiens NCBI  
-X-----XXX\_CP1B3B4P5Pa7oln Paratyndaris\_olneyae NCBI  
-XX-----XXX\_CP1B3B4P5Pa7BUP0171 Paratyndaris\_BUP0171 NCBI  
-XX-----XXX\_CP1B3B4P5M17BUP0291 Mimicoctytrina\_BUP0291 NCBI  
-XX-----XXX\_CP1B3B4P5Ty7mar Tyndaris\_marginella NCBI  
-XX-----XXX\_CP1B3B4P5Ty7pla Tyndaris\_planata NCBI  
-XX-----XX\_CP1B3B4P5Pa7aus Paratrachys\_australia NCBI  
-XX-----XX\_CP1B3B4P5Pt7gib Ptosima\_gibbicollis NCBI  
-X-----XX\_CP1B3B4P5No7pau Nothomorpha\_paupera NCBI  
-XX-----XX\_CP1B3B4P5Ac7C36 Acmaeodera\_C36 NCBI  
-XXXXXXXXXX\_CP1B3B4P5Ac7 Acmaeodera\_sp\_JX412781  
-XX-----XX\_CP1B3B4P5Ac7fas Acmaeodera\_fascigera NCBI  
-XX-----XX\_CP1B3B4P5Ac7BUP0093 Acmaeodera\_BUP0093 NCBI  
-XXXX-XXXX-XXXX\_CP1B3B4P5Ac7NCS2009 Acmaeodera\_NCS2009 NCBI  
-XXXXXXXXXXXXXXXX\_CP1B3B4P5Ac7 Acmaeodera\_sp\_NC\_013580  
-X-X-X-X-X\_CP1B3B4B5Bu7Fc\_C01 Buprestis\_FC\_C01 NCBI  
-XX-----XXX\_CP1B3B4Ch5Ps7juc Pseudhypanthera\_jucunda NCBI  
-XX-----XX\_CP1B3B4B5Bu7san Buprestis\_sanguinea NCBI  
-XX-----X\_CP1B3B4B5Bu7lae Buprestis\_laeviventris NCBI  
-XX-----XX\_CP1B3B4B5Na7vet Nascio\_vetusta NCBI  
-XX-----XX\_CP1B3B4B5Sp7gra Spectralia\_gracillipes NCBI  
-X-X-X-X-X\_CP1B3B4B5Eu7cha Euryaspilus\_chalodes NCBI  
-XX-----XXX\_CP1B3B4P5C07pou Coomanella\_purpurascens NCBI  
-XX-----XX\_CP1B3B4Ch5Cy7law Cyphosoma\_lawsoniae NCBI  
-XX-----XX\_CP1B3B4Ch5Ec7int Ectinogonia\_intermedia NCBI  
-XX-----XXX\_CP1B3B4B5Ne7BUP0019 Neocuris\_BUP0019 NCBI  
-XX-----XX\_CP1B3B4B5Se7cal Selagis\_caloptera NCBI  
-X-----XX\_CP1B3B4B5Se7int Selagis\_intercibrata NCBI  
-XX-----X-X\_CP1B3B4B5Mer7atr Merimma\_atrata NCBI  
-XX-----XX\_CP1B3B4B5Be7SZZ2014\_2 Belionota\_SZZ2014 NCBI  
-XX-----XX\_CP1B3B4B5Ac7cal Actenodes\_calcarata NCBI  
-XX-----XXX\_CP1B3B4B5Kn7cal Knowltonia\_calida NCBI  
-XX-----XXX\_CP1B3B4B5Chr7ina Chrysobothris\_inaequalis NCBI  
-XX-----X\_CP1B3B4B5Chr7mer Chrysobothris\_merkelii NCBI  
-X-----X\_CP1B3B4B5Chr7fem Chrysobothris\_femorata NCBI  
-XX-----XX-XXX\_CP1B3B4B5Chr7aff Chrysobothris\_affinis NCBI  
-XX-----XX\_CP1B3B4B5Me7con Melanophila\_consputa NCBI  
-XX-----X\_CP1B3B4B5D17jue Diadoxus\_juengi NCBI  
-X-----X\_CP1B3B4B5Ep7pic Epistomentis\_pictus NCBI  
-XX-----XX\_CP1B3B4B5Me7vit Melobasis\_vittata NCBI  
-XX-----XX\_CP1B3B4B5B17cor Bilyaxia\_cordillera NCBI  
-XX-----XX\_CP1B3B4B5An7ist Anthaxia\_istriana NCBI  
-XX-----XXX\_CP1B3B4B5Ma7aur Maoraxia\_auroimpressa NCBI  
-XX-----XX\_CP1B3B4B5Xe7mir Xenomelanophila\_miranda NCBI  
-X-----XX\_CP1B3B4B5Agr7fla Agrilaxia\_flavimana NCBI  
-XXXXXXXXXX\_CP1B3B4B5An7 Anthaxia\_sp\_JX412831  
-XX-----XX\_CP1B3B4Ch5Sp7BUP0141 Sphenoptera\_BUP0141 NCBI  
-XX-----XXX\_CP1B3B4B5Ani7BUP0209 Anilara\_BUP0209 NCBI  
-X-----XX\_CP1B3B4B5To7cup Torressita\_cuprifera NCBI  
-XX-----XX\_CP1B3B4B5An7BUP0140 Anthaxia\_BUP0140 NCBI  
-XX-----XX\_CP1B3B4B5Cha7BUP0241 Chalcoenia\_BUP0241 NCBI  
-XX-----XX\_CP1B3B4B5An7mel Anthaxia\_melanholica NCBI  
-X-----XX-XXX\_CP1B3B4B5An7hun Anthaxia\_hungarica NCBI  
-XX-----XX\_CP1B3B4B5Br7hol Brachelytrium\_holmi NCBI  
-X-----XX\_CP1B3B4B5An7BUP0088 Anthaxia\_BUP0088 NCBI  
-X-----XX\_CP1B3B4P5Ma7BUP0160 Mastogenius\_BUP0160 NCBI  
-XX-----XX\_CP1B3B4P5Ma7rob Mastogenius\_robustus NCBI  
-XX-----XX\_CP1B3B4P5He7man Helfereella\_manningsensis NCBI  
-XX-----XX\_CP1B3B4P5Ma7par Mastogenius\_parallelus NCBI  
-XX-----XXX\_CP1B3B4A5A7BUP0277 Aphaniisticus\_BUP0277 NCBI  
-XX-----XX\_CP1B3B4B5Tri7ang Trigonogonium\_angulosum NCBI  
-X-----X\_CP1B3B4A5Ha7nan Habroloma\_nana NCBI  
-XX-----XX\_CP1B3B4A5Li7mex Lius\_mexicanus NCBI  
-XX-----XX\_CP1B3B4A5Ha7BUP0282 Habroloma\_BUP0282 NCBI  
-XX-----XX\_CP1B3B4A5Ha7BUP0013 Habroloma\_BUP0013 NCBI  
-XXXXXXXXXXXXXXXX\_CP1B3B4A5 Agrilinae\_sp7\_B480tru.idba.19 MMG\_ANNOT\_FROM\_BARCODE  
-XX-----XXX\_CP1B3B4A5Ha7BUP0228 Habroloma\_BUP0228 NCBI  
-XXXXXXXXXXXXXXXX\_CP1B3\_Buprestoidea\_sp3\_B480tru.idba.95 MMG\_ANNOT\_FROM\_TREE

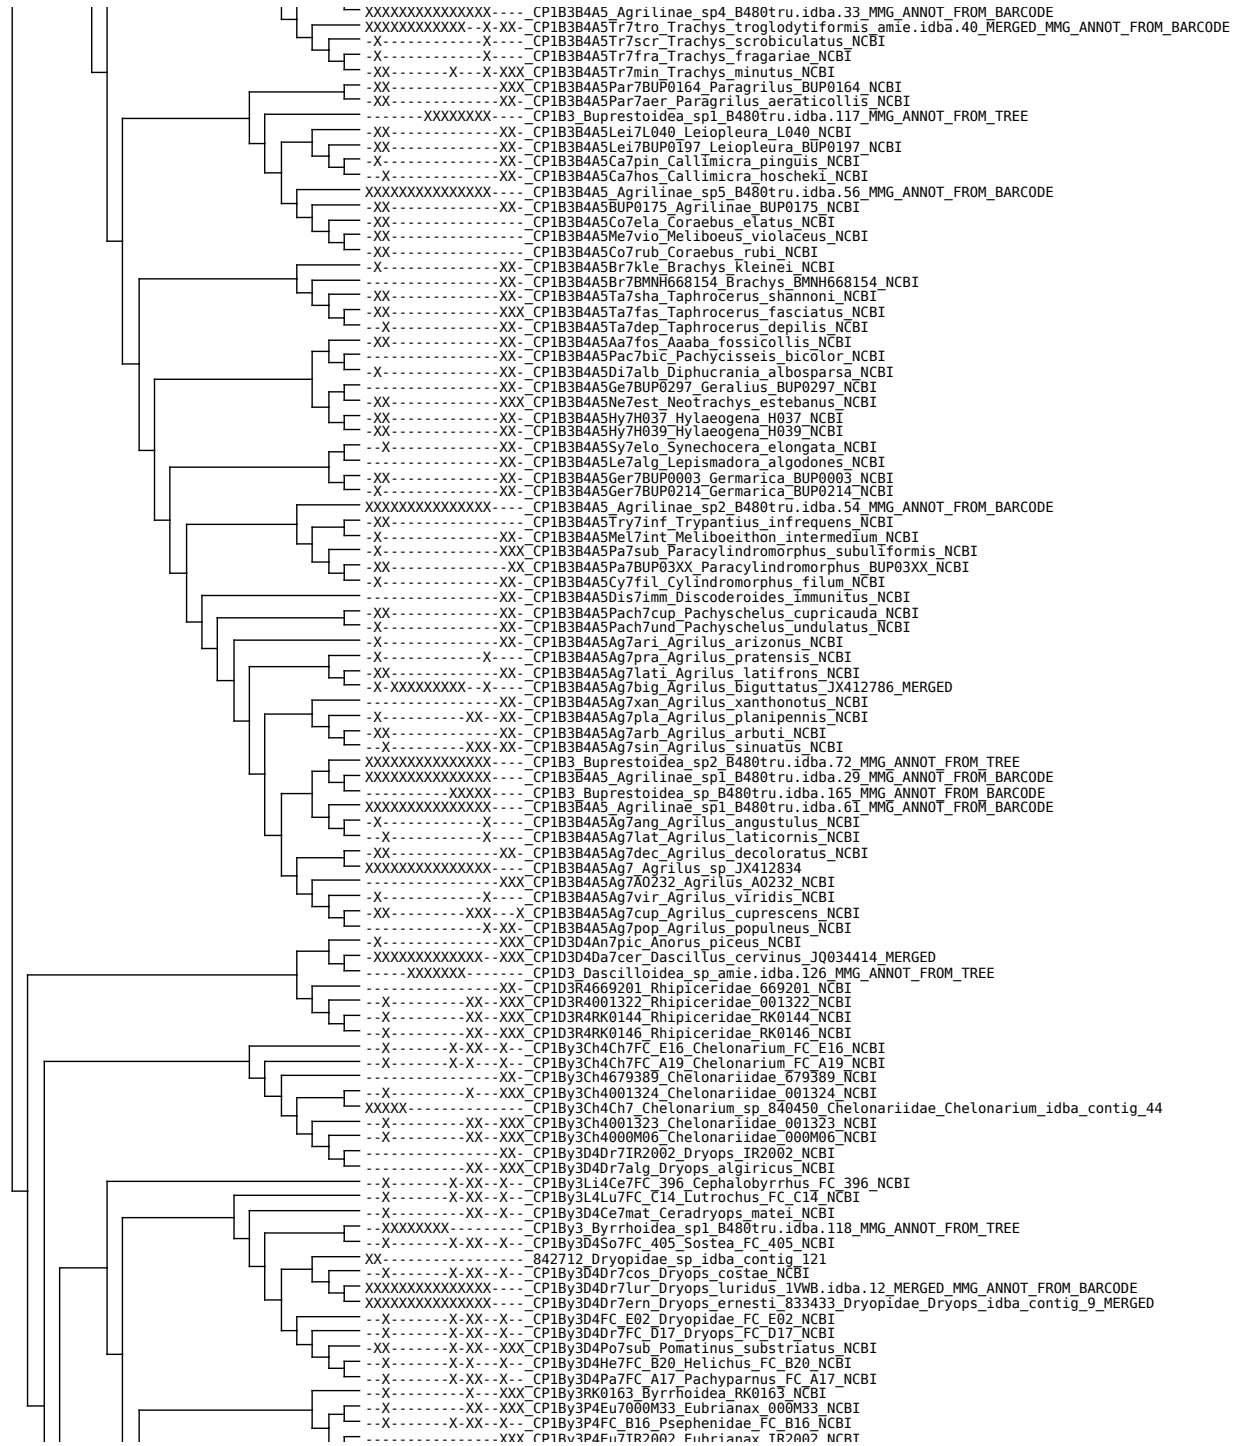



---X-----X-X---X---CP1By3P4FC\_B17\_Psephenidae\_FC\_B17\_NCB1  
-----XX-CP1By3Li4E07IR2002\_Eulimnichus\_IR2002\_NCB1  
---X-----XX-XXX-CP1By3001318\_Byrrhoidea\_001318\_NCB1  
---X-----XX-XXX-CP1By3Li4L17pyg\_Limnichus\_pygmaeus\_NCB1  
---X-----X-XX-X---CP1By3Li4L17FC\_290\_Limnichus\_FC\_290\_NCB1  
XXXXXXXXXXXXX-CP1By3Li4\_Limnichidae\_sp\_J0034416  
---X-----X-XX-X---CP1By3Li4Ma7FC\_443\_Mandersia\_FC\_443\_NCB1  
---X-----X-XX-X---CP1By3Li4P17FC\_D15\_Platipelochares\_FC\_D15\_NCB1  
XXXXXXXXXXXXX-CP1By3Li4By7\_Byrrhinus\_sp\_JX412827  
---X-----X-XX-X---CP1By3Li4By7FC\_E05\_Byrrhinus\_FC\_E05\_NCB1  
---X-----X-XX-X---CP1By3Li4Pe7FC\_444\_Pelochares\_FC\_444\_NCB1  
---X-----X-X---CP1By3H4T7pus\_Tropicus\_pusilla\_NCB1  
-----XX-X---CP1By3H4He7deb\_Heterocerus\_debilipes\_NCB1  
-----X-X---CP1By3H4Au7com\_Augyles\_compactus\_NCB1  
-----XXX-CP1By3H4Au7mar\_Augyles\_maritimus\_NCB1  
---X-----XX-X---CP1By3H4Au7aur\_Augyles\_auromicans\_NCB1  
XXXXXXXXXXXXX-CP1By3H4He7par\_Heterocerus\_parallelus\_amie.idba.47\_MERGED\_MMG\_ANNOT\_FROM\_BARCODE  
---X-----XX-CP1By3H4He7his\_Heterocerus\_hispidulus\_NCB1  
---X-----X-X---CP1By3H4He7int\_Heterocerus\_intermuralis\_NCB1  
---X-----X-X---CP1By3H4He7ang\_Heterocerus\_angolensis\_NCB1  
---X-----X-X---CP1By3H4Au7wei\_Augyles\_weigeli\_NCB1  
---X-----X-X---CP1By3H4He7mar\_Heterocerus\_marginatus\_NCB1  
---X-----X-X---CP1By3H4He7tex\_Heterocerus\_texanus\_NCB1  
---X-----X-X---CP1By3H4He7mex\_Heterocerus\_mexicanus\_NCB1  
---X-----X-XX-X---CP1By3H4He7FC\_F06\_Heterocerus\_FC\_F06\_NCB1  
XXXXXXXXXXXXX-X-CP1By3H4He7fen\_Heterocerus\_fenestratus\_HQ232811\_MERGED  
---X-----XX-XXX-CP1By3H4He7IR2002\_Heterocerus\_IR2002\_NCB1  
---X-----XX-X---CP1By3H4He7001048\_Heterocerus\_001048\_NCB1  
---X-----X-X---CP1By3H4He7pal\_Heterocerus\_pallidus\_NCB1  
---X-----X-X---CP1By3H4He7ins\_Heterocerus\_insolens\_NCB1  
---X-----XX-X---CP1By3H4He7bru\_Heterocerus\_brunneus\_NCB1  
---X-----XX-X---CP1By3H4He7bol\_Heterocerus\_bolivianus\_NCB1  
---X-----XX-X---CP1By3H4He7mol\_Heterocerus\_mollinus\_NCB1  
---X-----X-XX-X---CP1By3H4FC\_B19\_Heteroceridae\_FC\_B19\_NCB1  
---X-----X-XX-X---CP1By3H4FC\_B18\_Heteroceridae\_FC\_B18\_NCB1  
---X-----XX-XXX-CP1By3Pt4RK013I\_Ptilodactylidae\_RK013I\_NCB1  
XXXXXXXXXXXXX-CP1By3Pt4Pt7\_Ptilodactyla\_sp\_JX412727  
---X-----X-XX-X---CP1By3E4E5FC\_B22\_Elminae\_FC\_B22\_NCB1  
---X-----XXX-CP1By3Pt4RK0150\_Ptilodactylidae\_RK0150\_NCB1  
---X-----XX-XXX-CP1By3Pt4RK0152\_Ptilodactylidae\_RK0152\_NCB1  
---X-----XX-CP1By3Pt4Pt7IR2002a\_Ptilodactyla\_IR2002a\_NCB1  
XXXXXX-CP1E3\_Elateroidea\_sp1\_FG.idba.138\_MMG\_ANNOT\_FROM\_BARCODE  
XXXXXXX-CP1By3\_Byrrhoidea\_sp\_FG.idba.126\_MMG\_ANNOT\_FROM\_TREE  
---X-----X-X---CP1By3Pt4Pt7ser\_Ptilodactyla\_serricornis\_NCB1  
---X-----X-XXX-CP1By3Pt4Pt7IR2002b\_Ptilodactyla\_IR2002b\_NCB1  
---X-----XX-XXX-CP1By3Pt4RK0151\_Ptilodactylidae\_RK0151\_NCB1  
---X-----XX-XXX-CP1By3Pt4RK0149\_Ptilodactylidae\_RK0149\_NCB1  
---X-----X-XX-X---CP1By3Pt4FC\_E19\_Ptilodactylidae\_FC\_E19\_NCB1  
---X-----X-XXX-CP1By3Pt4RK0153\_Ptilodactylidae\_RK0153\_NCB1  
XXXXXXXXXXXXX-CP1By3\_Byrrhoidea\_sp3\_B480tru.idba.97\_MMG\_ANNOT\_FROM\_TREE  
---X-----X-XX-X---CP1By3Pt4FC\_E20\_Ptilodactylidae\_FC\_E20\_NCB1  
XXXXXXXXXXXXX-CP1By3Pt4\_Ptilodactylidae\_sp4\_B480tru.idba.82\_MMG\_ANNOT\_FROM\_BARCODE  
XXXXXXXXXXXXX-CP1By3Pt4\_Ptilodactylidae\_sp3\_B480tru.idba.38\_MMG\_ANNOT\_FROM\_BARCODE  
XXXXXXXXXXXXX-CP1By3Pt4\_Ptilodactylidae\_sp2\_B480tru.idba.42\_MMG\_ANNOT\_FROM\_BARCODE  
XXXXXX-CP1By3\_Byrrhoidea\_sp2\_B480tru.idba.155\_MMG\_ANNOT\_FROM\_TREE  
---X-----X-XX-X---CP1By3Pt4FC\_E18\_Ptilodactylidae\_FC\_E18\_NCB1  
XXXXXXXXXXXXX-CP1By3Pt4\_Ptilodactylidae\_sp2\_B480tru.idba.39\_MMG\_ANNOT\_FROM\_BARCODE  
XXXXXXXXXXXXX-CP1By3Eu4Eu7\_Eulichas\_sp\_HQ232812  
---X-----XX-XXX-CP1By3Eu4Eu700M22\_Eulichas\_000M22\_NCB1  
---X-----X-XX-X---CP1By3Eu4Eu7FC\_E06\_Eulichas\_FC\_E06\_NCB1  
---X-----X-XX-X---CP1By3C4Ca7FC\_Z22\_Callirhipis\_FC\_Z22\_NCB1  
---X-----XXX-CP1By3C4Ca7C0129\_Callirhipis\_C0129\_NCB1  
---X-----X-X-X---CP1By3C4En7FC\_Z23\_Ennometes\_FC\_Z23\_NCB1  
---X-----XX-CP1By3C4Ca7MJTNT2012\_Callirhipis\_MJTNT2012\_NCB1  
XXXXXXXXXXXXX-CP1By3C4\_Callirhipidae\_sp\_900056\_Callirhipidae\_sp  
---X-----XX-XXX-CP1By3C4001249\_Callirhipidae\_001249\_NCB1  
---X-----XXX-CP1By3C4Ho7nip\_Horatocera\_niponica\_NCB1  
---X-----XX-XXX-CP1By3C4000M23\_Callirhipidae\_000M23\_NCB1  
---X-----XX-XXX-CP1By3Pt4RK0169\_Psephenidae\_RK0169\_NCB1  
---X-----XX-XXX-CP1By3P4RK0169\_Psephenidae\_RK0169\_NCB1  
---X-----XX-XXX-CP1By3P4RK0168\_Psephenidae\_RK0168\_NCB1  
---X-----X-XX-XXX-CP1By3E4E5Ma7qua\_Macronychus\_quadrituberculatus\_NCB1  
---X-----X-XX-X---CP1By3E4L5Dr7FC\_C16\_Dryopomorphus\_FC\_C16\_NCB1  
---X-----X-XX-X---CP1By3E4E5C17FC\_E13\_Cleptelmis\_FC\_E13\_NCB1  
---X-----XX-CP1By3E4E5Ri7cup\_Riolus\_cupreus\_NCB1  
---XX-----X-X-X---CP1By3E4E5Ri7sub\_Riolus\_subviolaceus\_NCB1  
---XX-----X-X-X---CP1By3E4E5Es7ang\_Esolus\_angustatus\_NCB1  
---XX-----XX-CP1By3E4E5Es7par\_Esolus\_parallelepipedus\_NCB1  
---X-----X-XX-X---CP1By3E4E5No7FC\_B08\_Normandia\_FC\_B08\_NCB1  
---X-----XXX-CP1By3E4E5E17mau\_Elmis\_maugetti\_NCB1  
---X-----X-XX-X---CP1By3E4E5E17lat\_Elmis\_latreillei\_NCB1  
XXXXXXXXXXXXX-CP1Ch3Ce4V5Ve7con\_Vesperus\_conicicollis\_JX220996  
XXXXXXXXXXXXX-CP1By3E4E5\_Elminae\_sp\_JX412724  
---X-----XX-CP1By3E4E5E17rio\_Elmis\_rioloides\_NCB1  
---X-----XX-CP1By3E4E5E17aen\_Elmis\_aenea\_NCB1  
XXXXXXXXXXXXX-XXX-CP1By3E4E5Li7per\_Limnius\_perfrisi\_JX412747\_MERGED  
---X-----XX-XX-XXX-CP1By3E4E5Li7vol\_Limnius\_volckmari\_NCB1  
---X-----X-XX-X---CP1By3E4E5Li7int\_Limnius\_intermedius\_NCB1  
---X-X-----X-X---CP1By3E4E5Hete7obe\_Heterelmis\_obesa\_NCB1  
---X-X-----X-X---CP1By3E4E5Hete7vul\_Heterelmis\_vulnerata\_NCB1  
---X-X-----X-X---CP1By3E4E5Hete7gla\_Heterelmis\_glabra\_NCB1  
---X-X-----X-X---CP1By3E4E5Hete7com\_Heterelmis\_comalensis\_NCB1  
-----XXX-CP1By3E4L5La7MSC1288\_Lara\_MSC1288\_NCB1  
---X-----X-CP1By3E4E5Ou7IT1\_Oulimnius\_IT1\_NCB1  
---X-----XX-X---CP1By3E4E5Ou7ber\_Oulimnius\_bertrandi\_NCB1

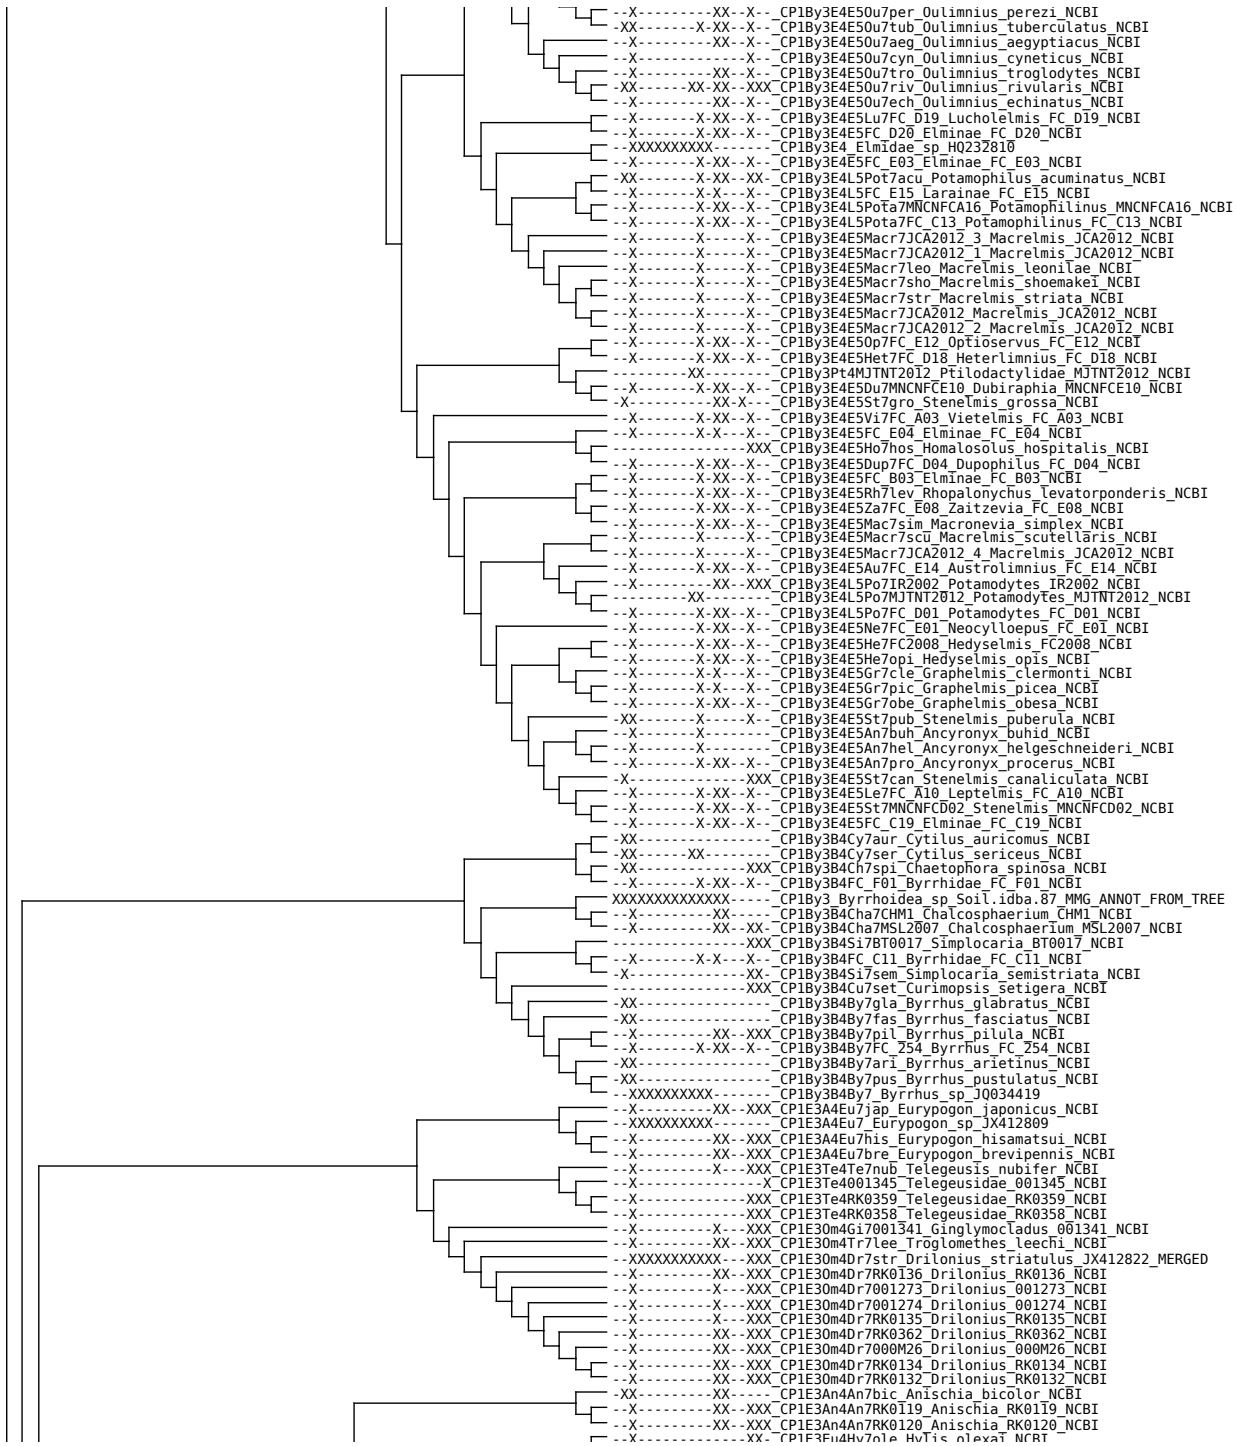

CP1E3Eu4RK0343 Eucnemidae\_RK0343 NCBI  
CP1E3Eu4Is7mar Isorhipis\_marmottani NCBI  
CP1E3Eu4Eu7MSL2007 Eucnemis\_MSL2007 NCBI  
CP1E3Eu4Me7bup Melasis\_buprestoides\_HQ232813  
CP1E3Eu4Me7bup Melasis\_buprestoides\_amie.idba.87\_MERGED\_MMG\_ANNOT\_FROM\_BARCODE  
CP1E3Eu4RK0347 Eucnemidae\_RK0347 NCBI  
CP1E3Eu4RK0171 Eucnemidae\_RK0171 NCBI  
CP1E3Eu4RK0342 Eucnemidae\_RK0342 NCBI  
CP1E3Eu4RK0346 Eucnemidae\_RK0346 NCBI  
CP1E3Eu4001226 Eucnemidae\_001226 NCBI  
CP1E3Eu4RK0303 Eucnemidae\_RK0303 NCBI  
CP1E3Eu4 Eucnemidae\_sp\_JX412858  
CP1E3Eu4001225 Eucnemidae\_001225 NCBI  
CP1E3Eu4001234 Eucnemidae\_001234 NCBI  
CP1E3Eu4RK0122 Eucnemidae\_RK0122 NCBI  
CP1E3Eu4Ne7703107 Nematodes\_703107 NCBI  
CP1E3Eu4Fo7703106 Fornax\_703106 NCBI  
CP1E3Eu4001229 Eucnemidae\_001229 NCBI  
CP1E3Eu4001228 Eucnemidae\_001228 NCBI  
CP1E3Eu4Dr7V2007 Dromaeolus\_VV2007 NCBI  
CP1E3 Elateroidea\_sp2\_FG.idba.64 MMG\_ANNOT\_FROM\_TREE  
CP1E3Eu4Fo7703099 Fornax\_703099 NCBI  
CP1E3Eu4Fo7703106\_1 Fornax\_703106 NCBI  
CP1E3 Elateroidea\_sp3\_Panama.idba.157 MMG\_ANNOT\_FROM\_TREE  
CP1E3Eu4Ne7cun Nematodes\_cuneatus NCBI  
CP1E3 Elateroidea\_sp7\_Panama.idba.208 MMG\_ANNOT\_FROM\_TREE  
CP1E3Eu4RK0121 Eucnemidae\_RK0121 NCBI  
CP1E3Eu4001330 Eucnemidae\_001330 NCBI  
CP1E3Eu4RK0352 Eucnemidae\_RK0352 NCBI  
CP1E3Eu4RK0125 Eucnemidae\_RK0125 NCBI  
CP1E3Eu4RK0054 Eucnemidae\_RK0054 NCBI  
CP1E3Eu4001235 Eucnemidae\_001235 NCBI  
CP1E3Eu4RK0126 Eucnemidae\_RK0126 NCBI  
CP1E3Eu4001233 Eucnemidae\_001233 NCBI  
CP1E3Eu4 Eucnemidae\_sp5\_B480tru.idba.53 MMG\_ANNOT\_FROM\_BARCODE  
CP1E3 Elateroidea\_sp11\_Panama.idba.85 MMG\_ANNOT\_FROM\_TREE  
CP1E3Eu4HyL7LB2009 Hylochaes\_LB2009 NCBI  
CP1E3Eu4HyL7cru Hylochaes\_cruentatus NCBI  
CP1E3 Elateroidea\_sp\_B480tru.idba.74 MMG\_ANNOT\_FROM\_TREE  
CP1E3Eu4001227 Eucnemidae\_001227 NCBI  
CP1E3Eu4Bi7Nis Bioxylus\_Nishikoma NCBI  
CP1E3Eu4RK0351 Eucnemidae\_RK0351 NCBI  
CP1E3Eu4001230 Eucnemidae\_001230 NCBI  
CP1E3Eu4Id7703105 Idiotarsus\_703105 NCBI  
CP1E3Eu4Id7703097 Idiotarsus\_703097 NCBI  
CP1E3Eu4RK0349 Eucnemidae\_RK0349 NCBI  
CP1E3Eu4001236 Eucnemidae\_001236 NCBI  
CP1E3Eu4RK0076 Eucnemidae\_RK0076 NCBI  
CP1E3Eu4001232 Eucnemidae\_001232 NCBI  
CP1E3Eu4RK0078 Eucnemidae\_RK0078 NCBI  
CP1E3Eu4001231 Eucnemidae\_001231 NCBI  
CP1E3Eu4Ga7wul Galbites\_wulacei NCBI  
CP1E3Eu4RK0077 Eucnemidae\_RK0077 NCBI  
CP1E3Eu4Ar7arm Arrhipis\_armipennis NCBI  
CP1E3Eu4001328 Eucnemidae\_001328 NCBI  
CP1E3Eu4Ar7LB2009\_3 Arrhipis\_LB2009 NCBI  
CP1E3Eu4Ar7cap Arrhipis\_capucina NCBI  
CP1E3Eu4Ar7LB2009 Arrhipis\_LB2009 NCBI  
CP1E3Eu4Ar7ori Arrhipis\_orientalis NCBI  
CP1E3Eu4Ar7LB2009\_1 Arrhipis\_LB2009 NCBI  
CP1E3Eu4Ar7LB2009\_2 Arrhipis\_LB2009 NCBI  
CP1E3Eu4Ar7gai Arrhipis\_gaillardi NCBI  
CP1E3Eu4Ar7vas Arrhipis\_vassei NCBI  
CP1E3Eu4Ar7mad Arrhipis\_madagascariensis NCBI  
CP1E3Eu4Ar7sen Arrhipis\_senegalensis NCBI  
CP1E3Eu4Ar7lan Arrhipis\_lanieri NCBI  
CP1E3Eu4Ar7ani Arrhipis\_anitrae NCBI  
CP1E3Eu4Ar7sub Arrhipis\_subacuta NCBI  
CP1E3Eu4Ar7703101 Arrhipis\_703101 NCBI  
CP1E3Eu4Ar7ele Arrhipis\_elegans NCBI  
CP1E3Eu4001331 Eucnemidae\_001331 NCBI  
CP1E3Eu4001334 Eucnemidae\_001334 NCBI  
CP1E3Eu4RK0348 Eucnemidae\_RK0348 NCBI  
CP1E3Eu4 Eucnemidae\_sp2\_B480tru.idba.106 MMG\_ANNOT\_FROM\_BARCODE  
CP1E3Eu4 Eucnemidae\_sp2\_B480tru.idba.151 MMG\_ANNOT\_FROM\_BARCODE  
CP1E3Eu4Eu7cap Eucnemis\_capucina NCBI  
CP1E3Eu4RK0124 Eucnemidae\_RK0124 NCBI  
CP1E3Eu4001332 Eucnemidae\_001332 NCBI  
CP1E3Eu4Mi7pyg Microrhagus\_pygmaeus NCBI  
CP1E3Eu4001223 Eucnemidae\_001223 NCBI  
CP1E3Eu4Pr7con Protofarsus\_convexus NCBI  
CP1E3Eu4Pr7703095 Protofarsus\_703095 NCBI  
CP1E3Eu4RK0357 Eucnemidae\_RK0357 NCBI  
CP1E3Eu4RK0340 Eucnemidae\_RK0340 NCBI  
CP1E3Eu4RK0341 Eucnemidae\_RK0341 NCBI  
CP1E3Eu4En7ame Entomophthalmus\_americanus NCBI  
CP1E3Eu4RK0356 Eucnemidae\_RK0356 NCBI  
CP1E3Eu4RK0355 Eucnemidae\_RK0355 NCBI  
CP1E3Eu4001333 Eucnemidae\_001333 NCBI  
CP1E3Eu4RK0345 Eucnemidae\_RK0345 NCBI  
CP1E3Eu4RK0123 Eucnemidae\_RK0123 NCBI  
CP1E3Eu4 Eucnemidae\_sp4\_B480tru.idba.37 MMG\_ANNOT\_FROM\_BARCODE  
CP1E3040m7fon Omalilus\_fontisbellaquei\_JX412744\_MERGED  
CP1E3040m7san Omalilus\_sanguinipennis NCBI  
CP1E3D4Ps7RK0079 Pseuduauanoma\_RK0079 NCBI

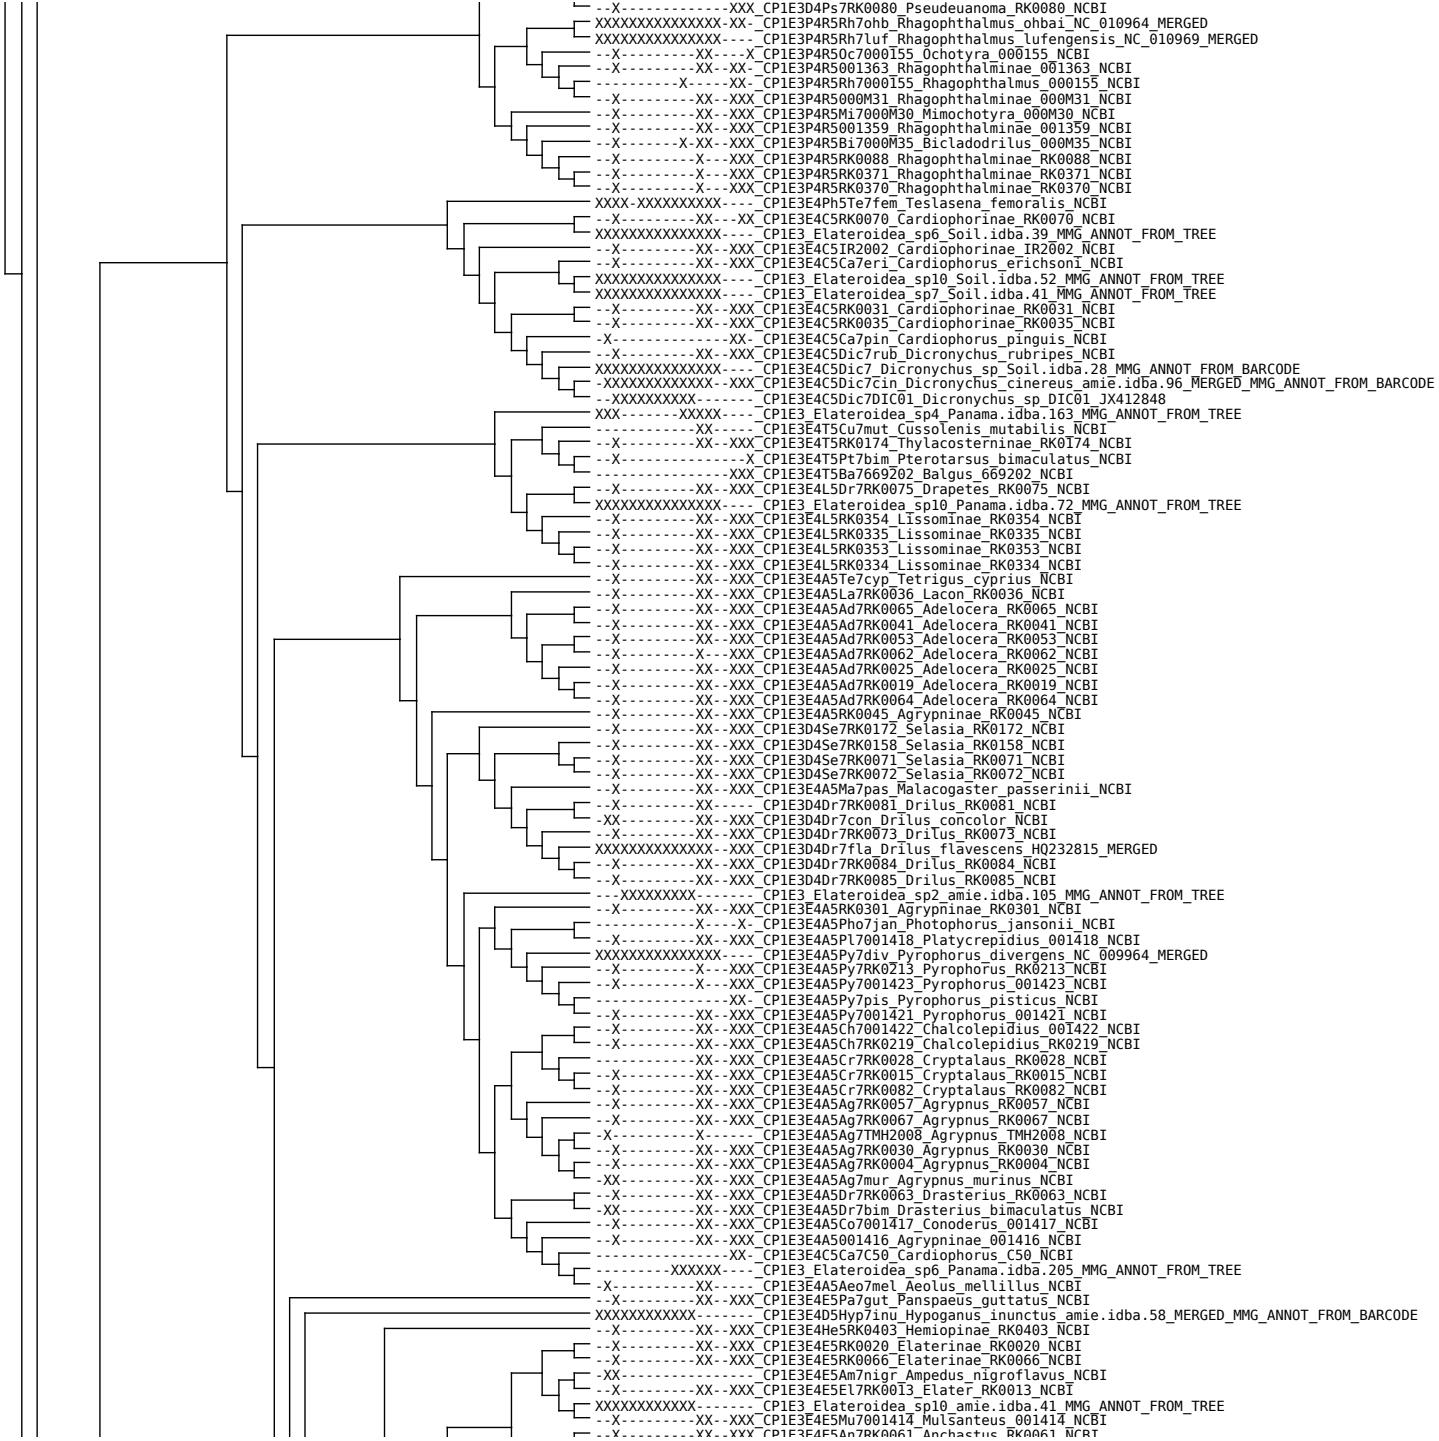

XXXXXXXXXXXXXXXXXXXXX CP1E3E4E5An7RK0060 Anchastus\_RK0060\_NCB1  
--X-----XX-XXX CP1E3E4E5An7RK0056 Anchastus\_RK0056\_NCB1  
--X-----XX-XXX CP1E3E4E5An7RK0051 Anchastus\_RK0051\_NCB1  
--X-----XX-XXX CP1E3E4Ce5Ce7RK0142 Cebrio\_RK0142\_NCB1  
-----XXX CP1E3Ceb4Se7DDM0602 Selonodon\_DDM0602\_NCB1  
XXXXXXXXXXXXXXXXXXXXX 679376 Cebrioninae\_sp\_idba\_contig\_5  
--X-----XX-XXX CP1E3E4Ce5679376 Cebrioninae\_679376\_NCB1  
XXXXXXXXXXXXXXXXXXXXX CP1E3E4E5Da7mar Dalopius\_marginatus\_BIUK\_idba.34\_MERGED\_MMG\_ANNOT\_FROM\_BARCODE  
-X-----X----- CP1E3E4E5Ag7cri Agriotes\_criddlei\_NCB1  
XXXXXXXXXXXXXXXXXXXXX CP1E3E4E5Id7pic Idolus\_picipennis\_amie\_idba.67\_MERGED\_MMG\_ANNOT\_FROM\_BARCODE  
XXXXXXXXXXXXXXXXXXXXX CP1E3E4E5Ad7rac Adrastus\_rachifer\_amie\_idba.32\_MERGED\_MMG\_ANNOT\_FROM\_BARCODE  
--X-----XX-XXX CP1E3E4E5RK0048 Elaterinae\_RK0048\_NCB1  
--X-----XX-XXX CP1E3E4E5RK0059 Elaterinae\_RK0059\_NCB1  
--X-----XX-XXX CP1E3E4E5RK0016 Elaterinae\_RK0016\_NCB1  
--X-----XX-XXX CP1E3E4E5RK0017 Elaterinae\_RK0017\_NCB1  
--X-----XX-XXX CP1E3E4E5RK0026 Elaterinae\_RK0026\_NCB1  
--X-----XX-XXX CP1E3E4E5RK0027 Elaterinae\_RK0027\_NCB1  
--X-----XX-XXX CP1E3E4E5001413 Elaterinae\_001413\_NCB1  
--X-----XX-XXX CP1E3E4E5Ag7pro Agriotes\_proximus\_NCB1  
--X-----XX-XXX CP1E3E4E5Ag7acu Agriotes\_acuminatus\_NCB1  
XXXXXXXXXXXXXXXXXXXXX CP1E3E4E5Ag7ust Agriotes\_ustulatus\_JX412737\_MERGED  
XXXXXXXXXXXXXXXXXXXXX CP1E3E4E5Ag7jobs Agriotes\_obscurus\_2VGB\_idba.10\_MERGED\_MMG\_ANNOT\_FROM\_BARCODE  
--X-----XX-XXX CP1E3E4E5Ag7lin Agriotes\_lineatus\_NCB1  
--X-----XX-XXX CP1E3E4E5Ag7ogu Agriotes\_ogurae\_NCB1  
--X-----X----- CP1E3E4E5Ag7spu Agriotes\_sputator\_NCB1  
--X-----X----- CP1E3E4E5Ag7sor Agriotes\_sordidus\_NCB1  
XXXXXXXXXXXXXXXXXXXXX CP1E3 Elateroidea\_sp5 Soil\_idba.37\_MMG\_ANNOT\_FROM\_TREE  
--X-----XX-XXX CP1E3E4001237 Elateridae\_001237\_NCB1  
--X-----XX-XXX CP1E3E4E5Ano7001415 Anoplischius\_001415\_NCB1  
--X-----XX-XXX CP1E3E4E5RK0310 Elaterinae\_RK0310\_NCB1  
--X-----XX-XXX CP1E3E4E5RK0404 Elaterinae\_RK0404\_NCB1  
--X-----XX-XXX CP1E3E4E5RK0203 Elaterinae\_RK0203\_NCB1  
--X-----XX-XXX CP1E3E4E5RK0406 Elaterinae\_RK0406\_NCB1  
--X-----XX-XXX CP1E3E4M5L7RK0055 Ludioschema\_RK0055\_NCB1  
--X-----XX-XXX CP1E3E4M5Lu7RK0024 Ludioschema\_RK0024\_NCB1  
--X-----XX-XXX CP1E3E4E5Pr7tib Procerus\_tibialis\_NCB1  
--X-----XX-XXX CP1E3E4E5RK0400 Elaterinae\_RK0400\_NCB1  
XXXXXXXXXXXXXXXXXXXXX CP1E3E4 Elateridae\_sp1 Panama\_idba.156\_MMG\_ANNOT\_FROM\_BARCODE  
XXXXXXXXXXXXXXXXXXXXX CP1E3 Elateroidea\_sp8 Panama\_idba.220\_MMG\_ANNOT\_FROM\_TREE  
XXXXXXXXXXXXXXXXXXXXX CP1E3E4 Elateridae\_sp2\_B480tru\_idba.41\_MMG\_ANNOT\_FROM\_BARCODE  
XXXXXXXXXXXXXXXXXXXXX CP1E3E4 Elateridae\_sp2\_B480tru\_idba.40\_MMG\_ANNOT\_FROM\_BARCODE  
--X-----XX-XXX CP1E3E4De5RK0014 Denticollinae\_RK0014\_NCB1  
--X-----XX-XXX CP1E3E4E5To7001420 Tomicephalus\_001420\_NCB1  
XXXXXXXXXXXXXXXXXXXXX CP1E3E4 Elateridae\_sp3\_B480tru\_idba.44\_MMG\_ANNOT\_FROM\_BARCODE  
--X-----XX-XXX CP1E3E4M5Pr7hum Priopus\_humeralis\_NCB1  
--X-----XX-XXX CP1E3E4M5Pr7orn Priopus\_ornatus\_NCB1  
--X-----XX-XXX CP1E3E4E5Am7san Ampedus\_sanguinolentus\_NCB1  
--X-----XX-XXX CP1E3E4E5Am7RK0005 Ampedus\_RK0005\_NCB1  
--X-----XX-XXX CP1E3E4E5Am7ruf Ampedus\_rufipennis\_NCB1  
--X-----XX-XXX CP1E3E4E5Am7RK0018 Ampedus\_RK0018\_NCB1  
--X-----XX-XXX CP1E3E4E5Am7ba1 Ampedus\_balteatus\_NCB1  
--X-----XX-XXX CP1E3E4E5Am7nige Ampedus\_nigerrimus\_NCB1  
--X-----XX-XXX CP1E3E4E5Am7sin Ampedus\_sinuatus\_NCB1  
--X-----XX-XXX CP1E3E4050c7001419 Octinodes\_001419\_NCB1  
--X-----XX-XXX CP1E3E4050c7RK0306 Octinodes\_RK0306\_NCB1  
XXXXXXXXXXXXXXXXXXXXX CP1E3E4 Elateridae\_sp6\_B480tru\_idba.94\_MMG\_ANNOT\_FROM\_BARCODE  
--X-----XX-XXX CP1E3E4M5Me7leg Melanotus\_legatus\_NCB1  
XXXXXXXXXXXXXXXXXXXXX CP1E3 Elateroidea\_sp8 Soil\_idba.46\_MMG\_ANNOT\_FROM\_TREE  
--X-----XX-XXX CP1E3E4M5Me7cas Melanotus\_castanipes\_NCB1  
XXXXXXXXXXXXXXXXXXXXX CP1E3E4M5Me7vil Melanotus\_villosus\_2VGB\_idba.11\_MERGED\_MMG\_ANNOT\_FROM\_BARCODE  
XXXXXXXXXXXXXXXXXXXXX CP1E3E4M5Me7vil Melanotus\_villosus\_amie\_idba.144\_MMG\_ANNOT\_FROM\_BARCODE  
--X-----XX-XXX CP1E3E4M5Me7ind Melanotus\_indistinctus\_NCB1  
--X-----XX-XXX CP1E3E4M5Me7lan Melanotus\_lanei\_NCB1  
--X-----XX-XXX CP1E3E4M5Me7pil Melanotus\_pilosus\_NCB1  
--X-----XX-XXX CP1E3E4M5Me7ver Melanotus\_verberans\_NCB1  
--X-----X----- CP1E3E4M5Me7sim Melanotus\_similis\_NCB1  
--X-----XX-XXX CP1E3E4M5Me7opa Melanotus\_opacicollis\_NCB1  
--X-----XX-XXX CP1E3E4A5Co7liv Conoderus\_lividus\_NCB1  
--X-----XX-XXX CP1E3E4M5Me7dep Melanotus\_depressus\_NCB1  
--X-----XX-XXX CP1E3E4M5Me7die Melanotus\_dietrichi\_NCB1  
--X-----XX-XXX CP1E3E4M5Me7l817 Melanotus\_1817\_NCB1  
--X-----XX-XXX CP1E3E4M5Me7cri Melanotus\_cribulosus\_NCB1  
--X-----XX-XXX CP1E3E4Ce5Di7RK0145 Diplophoenicus\_RK0145\_NCB1  
X-----XXXX CP1E3 Elateroidea\_sp4 amie\_idba.129\_MMG\_ANNOT\_FROM\_TREE  
-----XXXX CP1E3 Elateroidea\_sp8 amie\_idba.181\_MMG\_ANNOT\_FROM\_TREE  
XXXXXXXXXXXXXXXXXXXXX CP1E3E4D5Ca7bip Calambus\_bipustulatus\_BIUK\_idba.31\_MERGED\_MMG\_ANNOT\_FROM\_BARCODE  
--X-----XX-XXX CP1E3E4De5An7pur Anostirus\_purpureus\_NCB1  
XXXXXXXXXXXXXXXXXXXXX CP1E3E4De5An7cas Anostirus\_castaneus\_amie\_idba.28\_MERGED\_MMG\_ANNOT\_FROM\_BARCODE  
--X-----XX-XXX CP1E3E4D5P17RK0029 Platiana\_RK0029\_NCB1  
--X-----XX-XXX CP1E3E4N5F17cur Fleutiauxellus\_curatus\_NCB1  
--X-----XX-XXX CP1E3E4N5Zo7RK0044 Zoroichros\_RK0044\_NCB1  
--X-----XX-XXX CP1E3E4N5Zo7RK0043 Zoroichros\_RK0043\_NCB1  
--X-----XX-XXX CP1E3E4N5Qu7RK0049 Quasimus\_RK0049\_NCB1  
--X-----XX-XXX CP1E3E4N5RK0058 Negastrinae\_RK0058\_NCB1  
--X-----XX-XXX CP1E3E4N5Qu7RK0050 Quasimus\_RK0050\_NCB1  
--X-----X----- CP1E3E4De5Se7cru Selatosomus\_cruciatatus\_NCB1  
--X-----XX-XXX CP1E3E4De5Hy7RK0042 Hypolithus\_RK0042\_NCB1  
--X-----XX-XXX CP1E3E40x5Pe7bab Pectocera\_babai\_NCB1  
--X-----XX-XXX CP1E3E40x5Pe7for Pectocera\_fortunei\_NCB1  
--X-----XX-XXX CP1E3E40x5Ov7RK0047 Oxynoporus\_RK0047\_NCB1  
XXXXXXXXXXXXXXXXXXXXX CP1E3E4N5Ne7sab Negastrus\_sabulicola\_amie\_idba.161\_MERGED\_MMG\_ANNOT\_FROM\_BARCODE  
--X-----XX-XXX CP1E3E40x5Ca7aur Campsosternus\_auratus\_NCB1  
--X-----XX-XXX CP1E3E40x5Ca7mir Campsosternus\_mirabilis\_NCB1  
--X-----XX-XXX CP1E3E40x5Ca7yas Campsosternus\_yasuakii\_NCB1  
--X-----XX-XXX CP1E3E40x5Ca7gem Campsosternus\_gemma\_NCB1

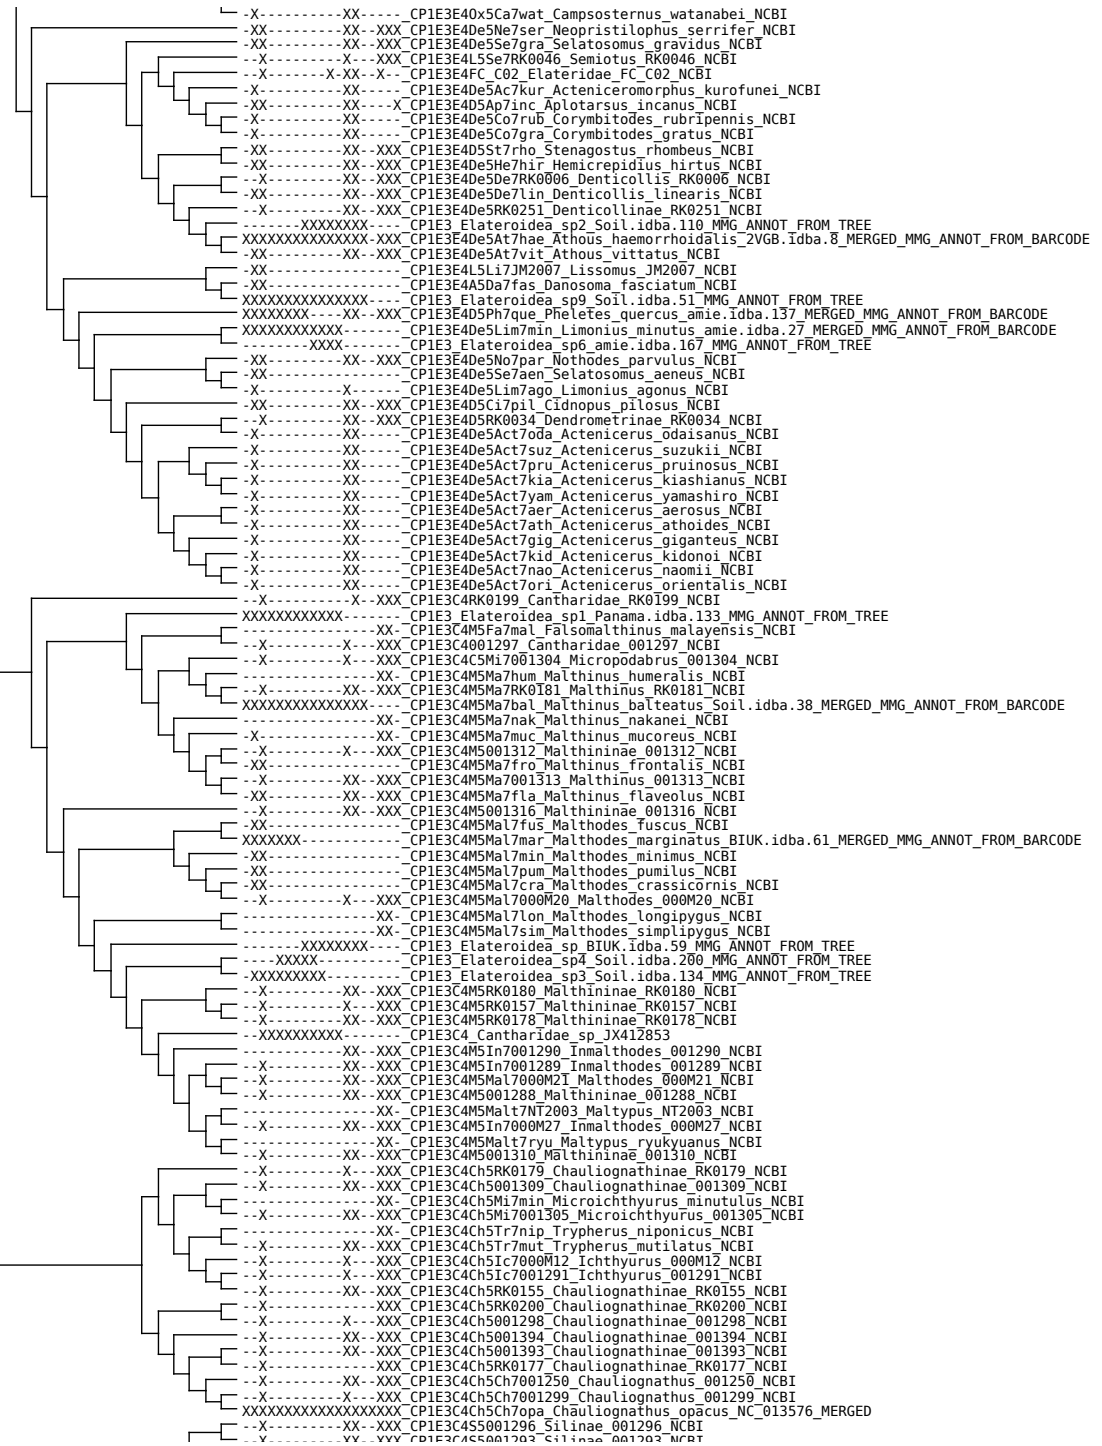

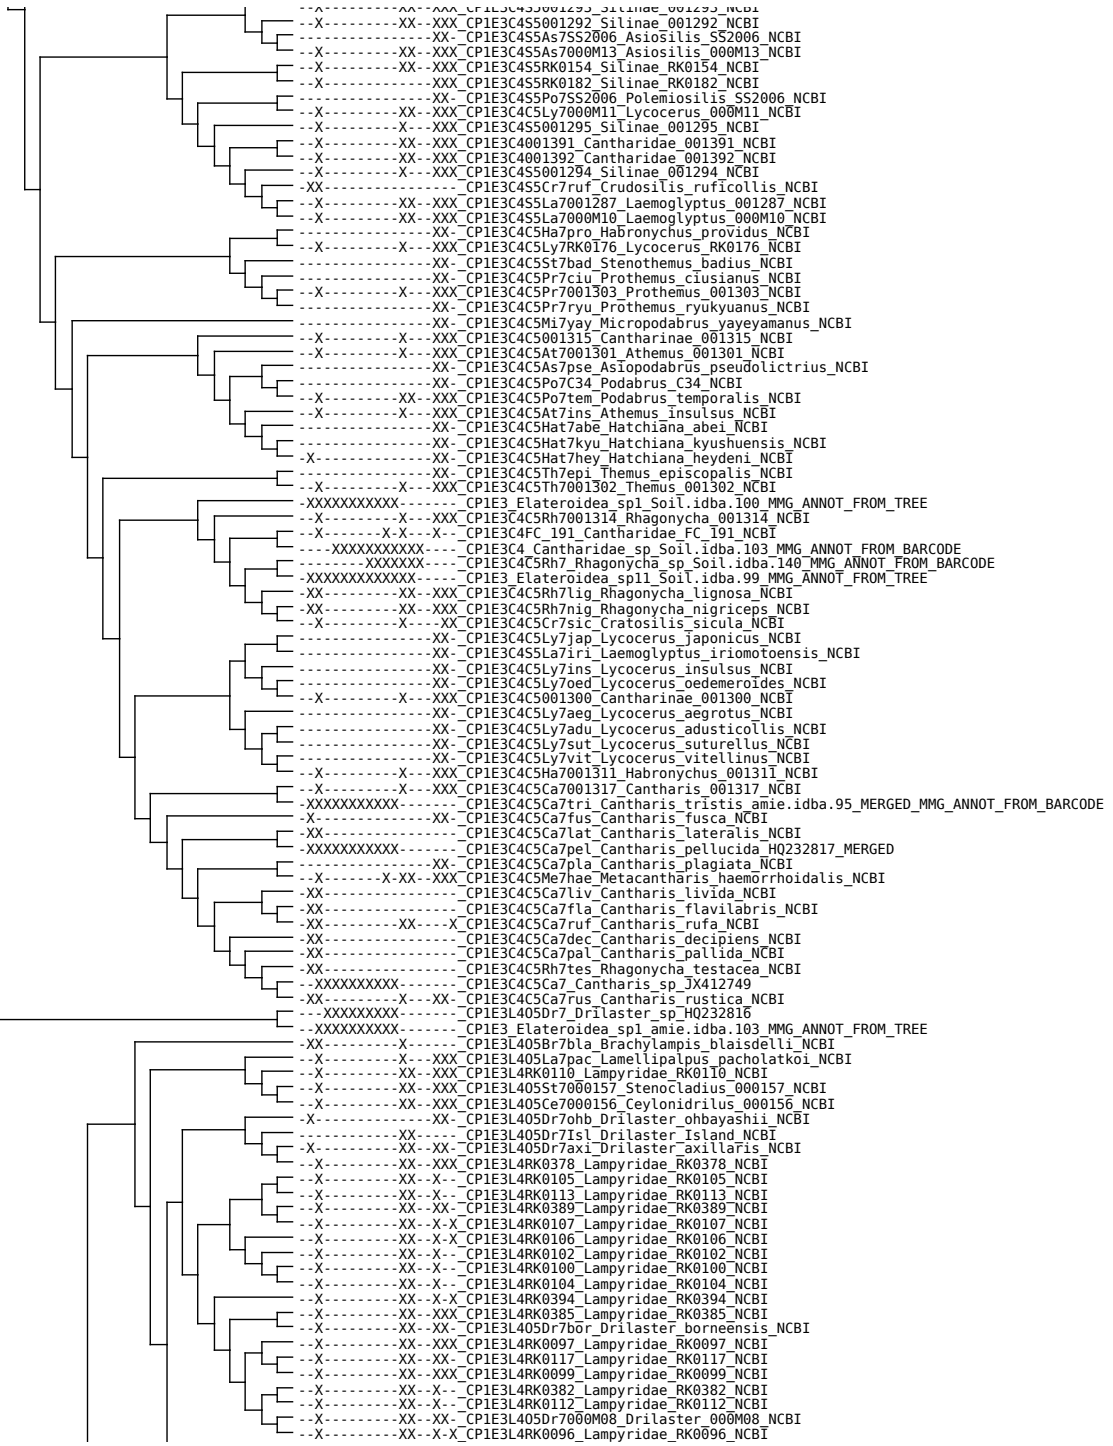





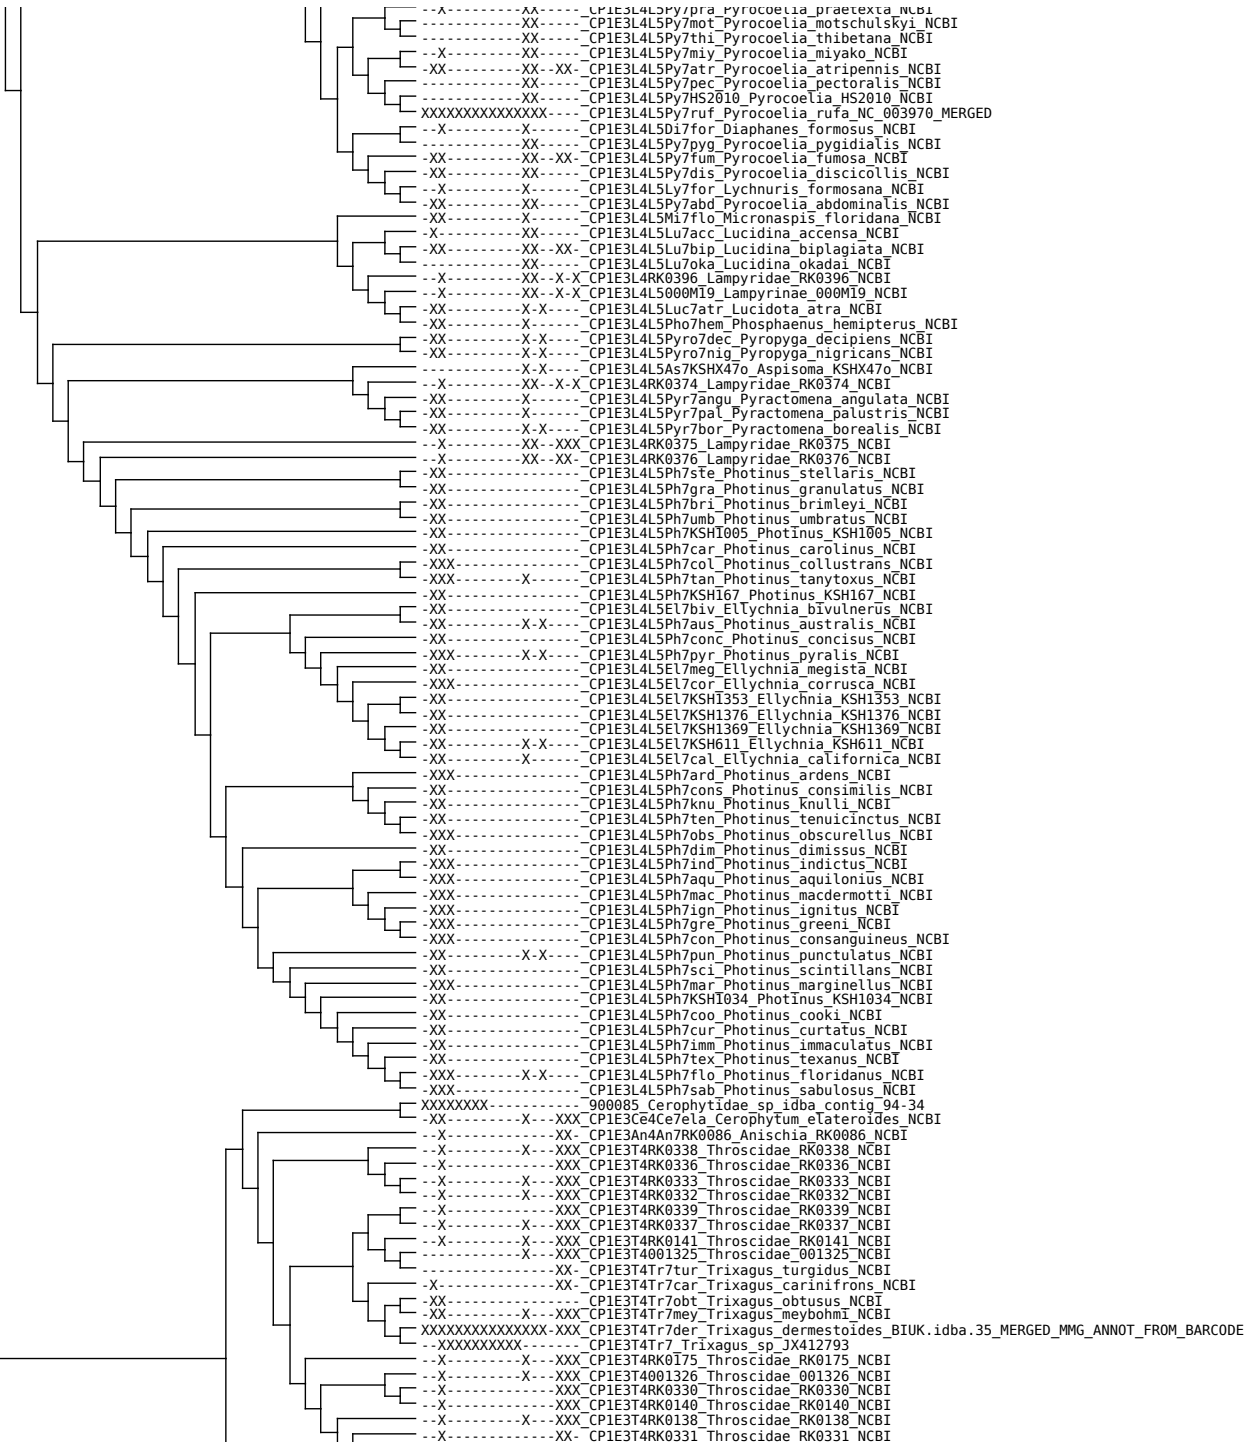

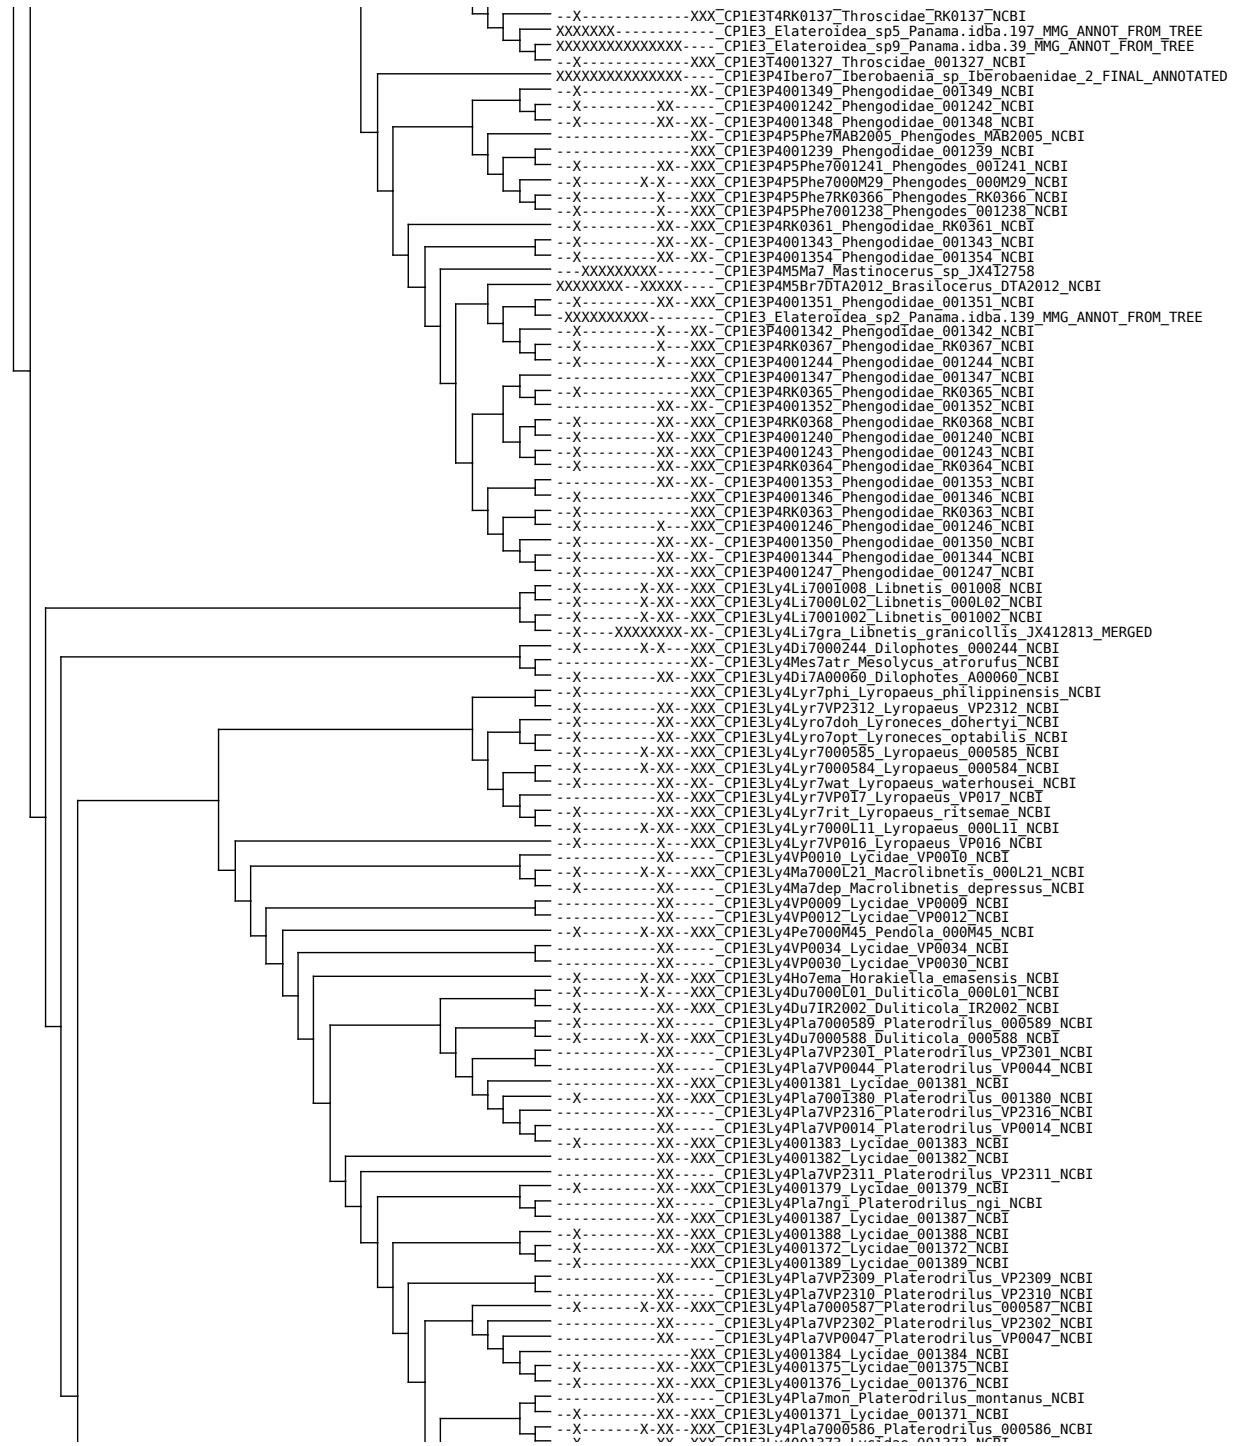

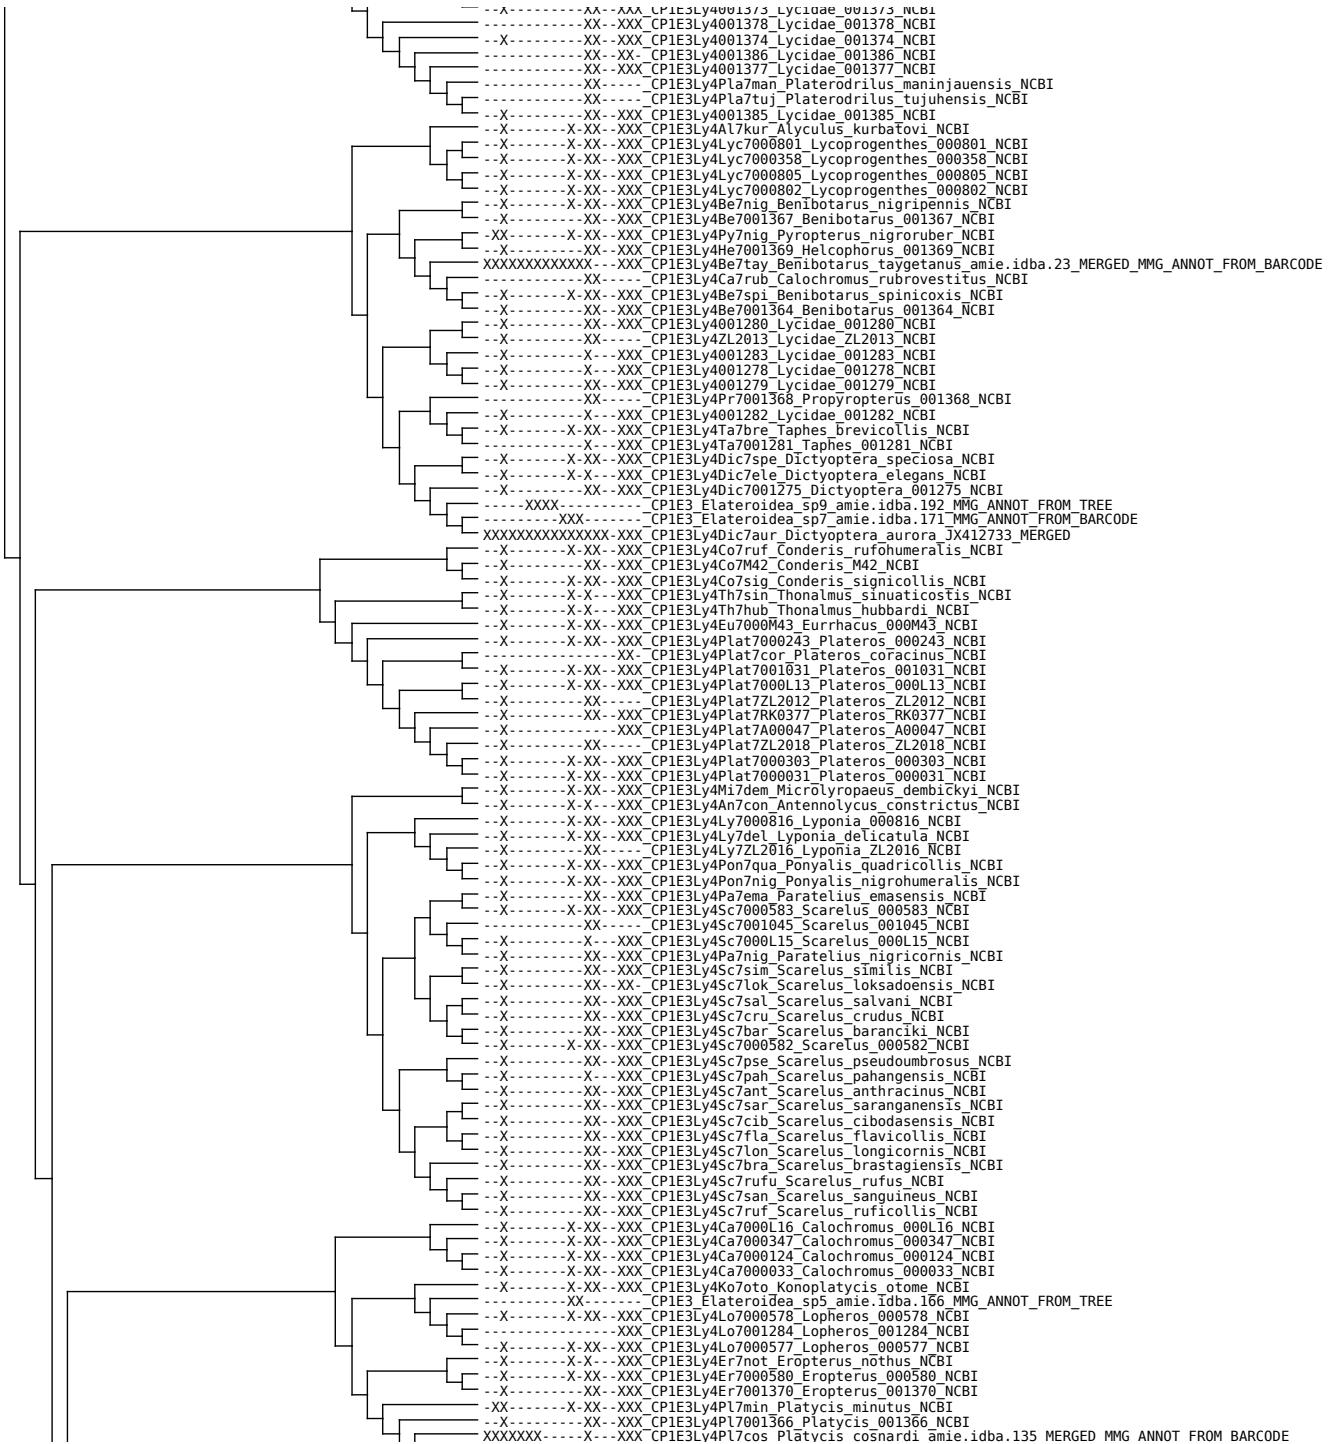

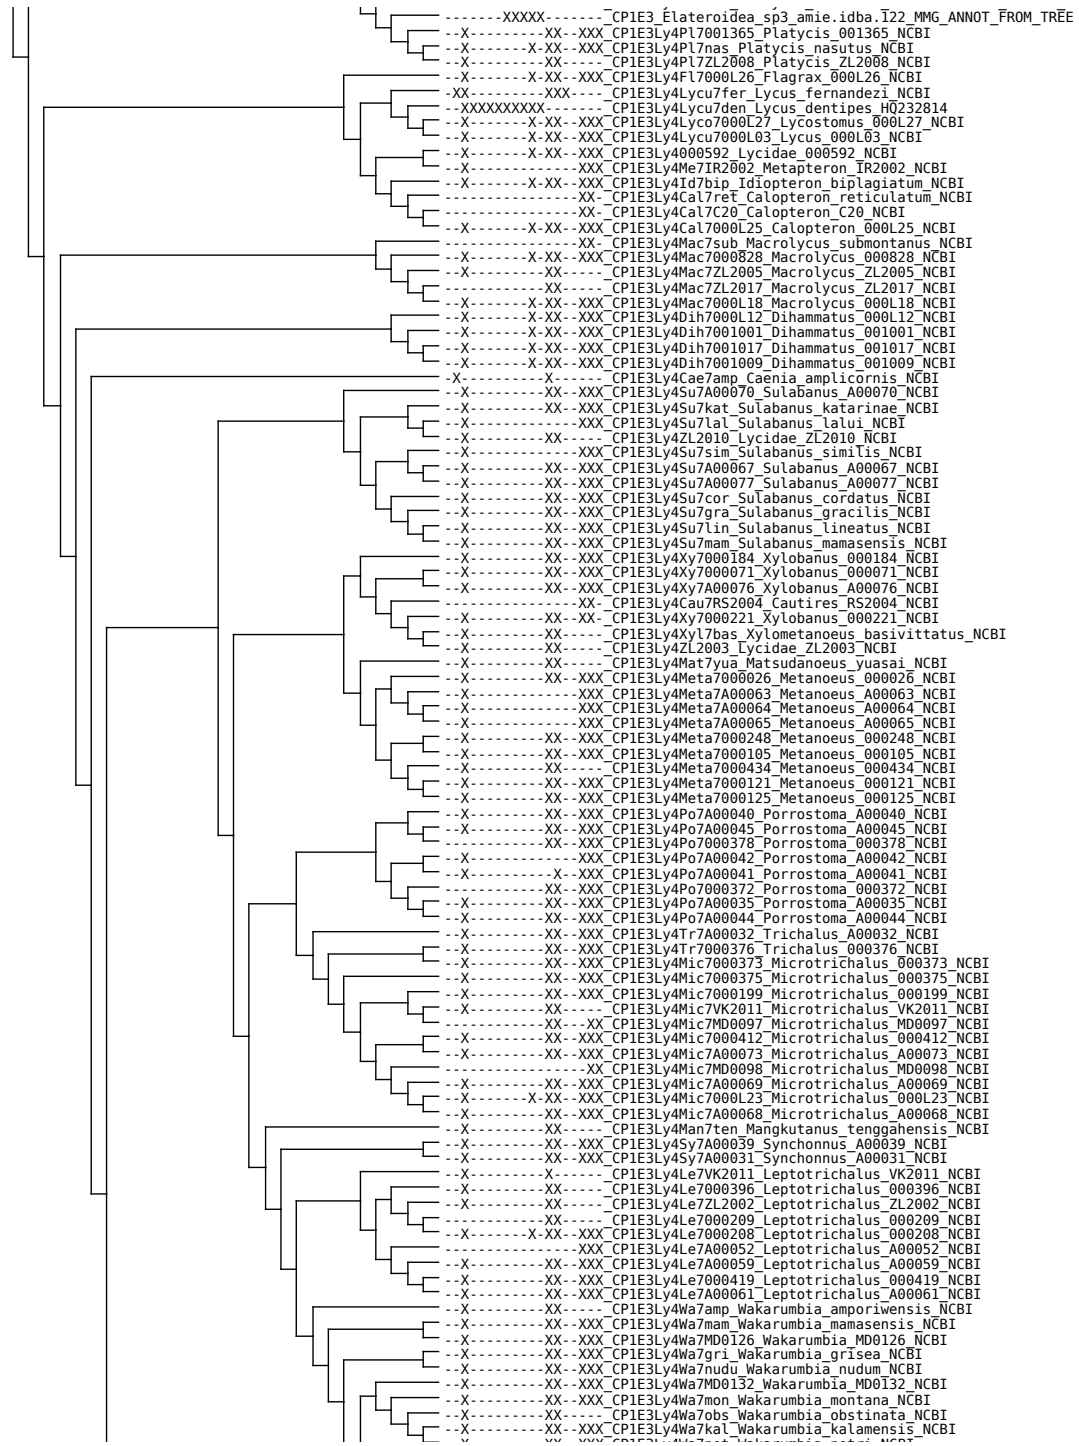

--X-----XX-XXX\_CP1E3Ly4Wa/pet\_wakarumbia\_petri\_NLBI  
--X-----XX-XXX\_CP1E3Ly4Wa7kun\_Wakarumbia\_kundratai\_NCBI  
--X-----XX-XXX\_CP1E3Ly4Wa7nudum\_Wakarumbia\_nudum\_NCBI  
--X-----XX-XXX\_CP1E3Ly4Wa7lin\_Wakarumbia\_linearis\_NCBI  
--X-----XX-XXX\_CP1E3Ly4Wa7aur\_Wakarumbia\_aurea\_NCBI  
--X-----XX-XXX\_CP1E3Ly4Wa7nud\_Wakarumbia\_nudum\_NCBI  
--X-----XX-XXX\_CP1E3Ly4Wa7pen\_Wakarumbia\_pendoTensis\_NCBI  
--X-----XX-XXX\_CP1E3Ly4Wa7fas\_Wakarumbia\_fasciata\_NCBI  
--X-----XX-XXX\_CP1E3Ly4Met7A00046\_Metriorrhynchus\_A00046\_NCBI  
--X-----XX-XXX\_CP1E3Ly4Dit7A00033\_Ditua\_A00033\_NCBI  
--X-----XX-XXX\_CP1E3Ly4A00038\_Lycidae\_A00038\_NCBI  
--X-----XX-XX-CP1E3Ly4Br7pfe\_Broxylus\_pfeifferi\_NCBI  
--X-----XX-XX-CP1E3Ly4Br7kal\_Broxylus\_kalamensis\_NCBI  
--X-----XX-XXX\_CP1E3Ly4Br7mal\_Broxylus\_malinensis\_NCBI  
--X-----XX-XX-CP1E3Ly4Br7pen\_Broxylus\_pendolensis\_NCBI  
--X-----XX-XXX\_CP1E3Ly4Met7000374\_Metriorrhynchus\_000374\_NCBI  
--X-----XX-XXX\_CP1E3Ly4Met7A00043\_Metriorrhynchus\_A00043\_NCBI  
--X-----XX-XXX\_CP1E3Ly4Po7A00036\_Porrostoma\_A00036\_NCBI  
--X-----XX-XXX\_CP1E3Ly4Met7A00034\_Metriorrhynchus\_A00034\_NCBI  
--X-----XX-XXX\_CP1E3Ly4Met700010\_Metriorrhynchus\_00010\_NCBI  
--X-----XX-XXX\_CP1E3Ly4Met700017\_Metriorrhynchus\_00017\_NCBI  
--X-----XX-XXX\_CP1E3Ly4Met700011\_Metriorrhynchus\_00011\_NCBI  
--X-----XX-XXX\_CP1E3Ly4Met7A00049\_Metriorrhynchus\_A00049\_NCBI  
--X-----X-XX-XXX\_CP1E3Ly4Met7lin\_Metriorrhynchus\_lineatus\_NCBI  
--X-----XX-XXX\_CP1E3Ly4Met700009\_Metriorrhynchus\_00009\_NCBI  
--X-----XX-XXX\_CP1E3Ly4Cau7000224\_Cautires\_000224\_NCBI  
--X-----XX-XXX\_CP1E3Ly4Xy7000274\_Xylobanus\_000274\_NCBI  
--X-----XXX\_CP1E3Ly4Xy7000154\_Xylobanus\_000154\_NCBI  
--X-----XXX\_CP1E3Ly4Xy7A00018\_Xylobanus\_A00018\_NCBI  
--X-----XX-XXX\_CP1E3Ly4Xy7A00054\_Xylobanus\_A00054\_NCBI  
--X-----XX-XX-CP1E3Ly4Xy7000402\_Xylobanus\_000402\_NCBI  
--X-----XX-XX-CP1E3Ly4Xy7000379\_Xylobanus\_000379\_NCBI  
--X-----XX-XXX\_CP1E3Ly4Xy7000120\_Xylobanus\_000120\_NCBI  
--X-----XX-XXX\_CP1E3Ly4Xy7000152\_Xylobanus\_000152\_NCBI  
--X-----XX-XXX\_CP1E3Ly4Xy7VK2011\_Xylobanus\_VK2011\_NCBI  
--X-----XX-XXX\_CP1E3Ly4Xy7MD0036\_Xylobanus\_MD0036\_NCBI  
--X-----XX-XXX\_CP1E3Ly4Xy7MD0029\_Xylobanus\_MD0029\_NCBI  
--X-----XX-XXX\_CP1E3Ly4Xy7000153\_Xylobanus\_000153\_NCBI  
--X-----XX-XXX\_CP1E3Ly4Xy7tau\_Xylobanus\_tauensis\_NCBI  
--X-----XX-XXX\_CP1E3Ly4Cau7000335\_Cautires\_000335\_NCBI  
--X-----XX-XXX\_CP1E3Ly4Cau7000205\_Cautires\_000205\_NCBI  
--X-----XX-XXX\_CP1E3Ly4Cau7000069\_Cautires\_000069\_NCBI  
--X-----XX-XXX\_CP1E3Ly4Cau7A00057\_Cautires\_A00057\_NCBI  
--X-----XX-XXX\_CP1E3Ly4Cau7A00058\_Cautires\_A00058\_NCBI  
--X-----XX-XXX\_CP1E3Ly4Cau7VK2011\_Cautires\_VK2011\_NCBI  
--X-----XX-XXX\_CP1E3Ly4Cau7A00090\_Cautires\_A00090\_NCBI  
--X-----XX-XXX\_CP1E3Ly4Cau7A00099\_Cautires\_A00099\_NCBI  
--X-----XXX\_CP1E3Ly4Cau7A00080\_Cautires\_A00080\_NCBI  
--X-----XX-XXX\_CP1E3Ly4Xy7A00074\_Xylobanus\_A00074\_NCBI  
--X-----XX-XXX\_CP1E3Ly4Xy7A00053\_Xylobanus\_A00053\_NCBI  
--X-----XX-XXX\_CP1E3Ly4Cau7A00079\_Cautires\_A00079\_NCBI  
--X-----XX-XXX\_CP1E3Ly4Cau7A00092\_Cautires\_A00092\_NCBI  
--X-----XX-XXX\_CP1E3Ly4Cau7A00086\_Cautires\_A00086\_NCBI  
--X-----XX-XXX\_CP1E3Ly4Cau7A00084\_Cautires\_A00084\_NCBI  
--X-----XX-XXX\_CP1E3Ly4Xy7A00094\_Xylobanus\_A00094\_NCBI  
--X-----XX-XXX\_CP1E3Ly4Xy7A00104\_Xylobanus\_A00104\_NCBI  
--X-----XX-XXX\_CP1E3Ly4Xy7A00095\_Xylobanus\_A00095\_NCBI  
--X-----XX-XXX\_CP1E3Ly4Xy7A00096\_Xylobanus\_A00096\_NCBI  
--X-----XX-XXX\_CP1E3Ly4Xy7A00091\_Xylobanus\_A00091\_NCBI  
--X-----XX-XXX\_CP1E3Ly4Xy7A00097\_Xylobanus\_A00097\_NCBI  
--X-----XX-XXX\_CP1E3Ly4Xy7A00098\_Xylobanus\_A00098\_NCBI  
--X-----XX-XXX\_CP1E3Ly4Xy7000132\_Xylobanus\_000132\_NCBI  
--X-----X-XXX\_CP1E3Ly4Cau7A00022\_Cautires\_A00022\_NCBI  
--X-----XX-XXX\_CP1E3Ly4Cau7A00023\_Cautires\_A00023\_NCBI  
--X-----XX-XXX\_CP1E3Ly4Cau7A00024\_Cautires\_A00024\_NCBI  
--X-----XX-XXX\_CP1E3Ly4Cau7A00027\_Cautires\_A00027\_NCBI  
--X-----XX-XXX\_CP1E3Ly4Cau7A00025\_Cautires\_A00025\_NCBI  
--X-----XX-XXX\_CP1E3Ly4Cau7A00028\_Cautires\_A00028\_NCBI  
--X-----XX-XXX\_CP1E3Ly4Cau7A00026\_Cautires\_A00026\_NCBI  
--X-----XX-XXX\_CP1E3Ly4Cau7A00030\_Cautires\_A00030\_NCBI  
--X-----XX-XXX\_CP1E3Ly4Cau7A00029\_Cautires\_A00029\_NCBI  
--X-----XX-XXX\_CP1E3Ly4Cau7A00105\_Cautires\_A00105\_NCBI  
--X-----XX-XXX\_CP1E3Ly4Cau7A00082\_Cautires\_A00082\_NCBI  
--X-----XX-XXX\_CP1E3Ly4Cau7A00101\_Cautires\_A00101\_NCBI  
--X-----XX-XXX\_CP1E3Ly4Cau7A00107\_Cautires\_A00107\_NCBI  
--X-----XX-XXX\_CP1E3Ly4Cau7A00081\_Cautires\_A00081\_NCBI  
--X-----XX-XXX\_CP1E3Ly4Cau7A00103\_Cautires\_A00103\_NCBI  
--X-----X-X-XXX\_CP1E3Ly4Cau7000114\_Cautires\_000114\_NCBI  
--X-----XX-XXX\_CP1E3Ly4Cau7000195\_Cautires\_000195\_NCBI  
--X-----XX-XXX\_CP1E3Ly4Cau7A00078\_Cautires\_A00078\_NCBI  
--X-----XX-XXX\_CP1E3Ly4Cau7A00106\_Cautires\_A00106\_NCBI  
--X-----XX-XXX\_CP1E3Ly4Cau7A00087\_Cautires\_A00087\_NCBI  
--X-----XX-XXX\_CP1E3Ly4Cau7A00088\_Cautires\_A00088\_NCBI  
--X-----XX-XXX\_CP1E3Ly4Cau7A00102\_Cautires\_A00102\_NCBI  
--X-----XX-XXX\_CP1E3Ly4Cau7A00089\_Cautires\_A00089\_NCBI  
--X-----XX-XXX\_CP1E3Ly4Cau7A00093\_Cautires\_A00093\_NCBI  
--X-----XX-XXX\_CP1E3Ly4Cau7A00112\_Cautires\_A00112\_NCBI  
--X-----XX-XXX\_CP1E3Ly4Cau7A00109\_Cautires\_A00109\_NCBI  
--X-----XX-XXX\_CP1E3Ly4Cau7A00110\_Cautires\_A00110\_NCBI  
--X-----XX-XXX\_CP1E3Ly4Cau7A00111\_Cautires\_A00111\_NCBI  
--X-----XX-XXX\_CP1E3Ly4Cau7A00085\_Cautires\_A00085\_NCBI  
--X-----XX-XX-CP1E3Ly4Cau7A00100\_Cautires\_A00100\_NCBI  
--X-----XX-XXX\_CP1E3Ly4Cau7A00020\_Cautires\_A00020\_NCBI  
--X-----XX-XXX\_CP1E3Ly4Cau7apt\_Cautires\_apterus\_NCBI  
--X-----XX-XXX\_CP1E3Ly4Cau7000068\_Cautires\_000068\_NCBI  
--X-----XX-XXX\_CP1E3Ly4Cau7000030\_Cautires\_000030\_NCBI

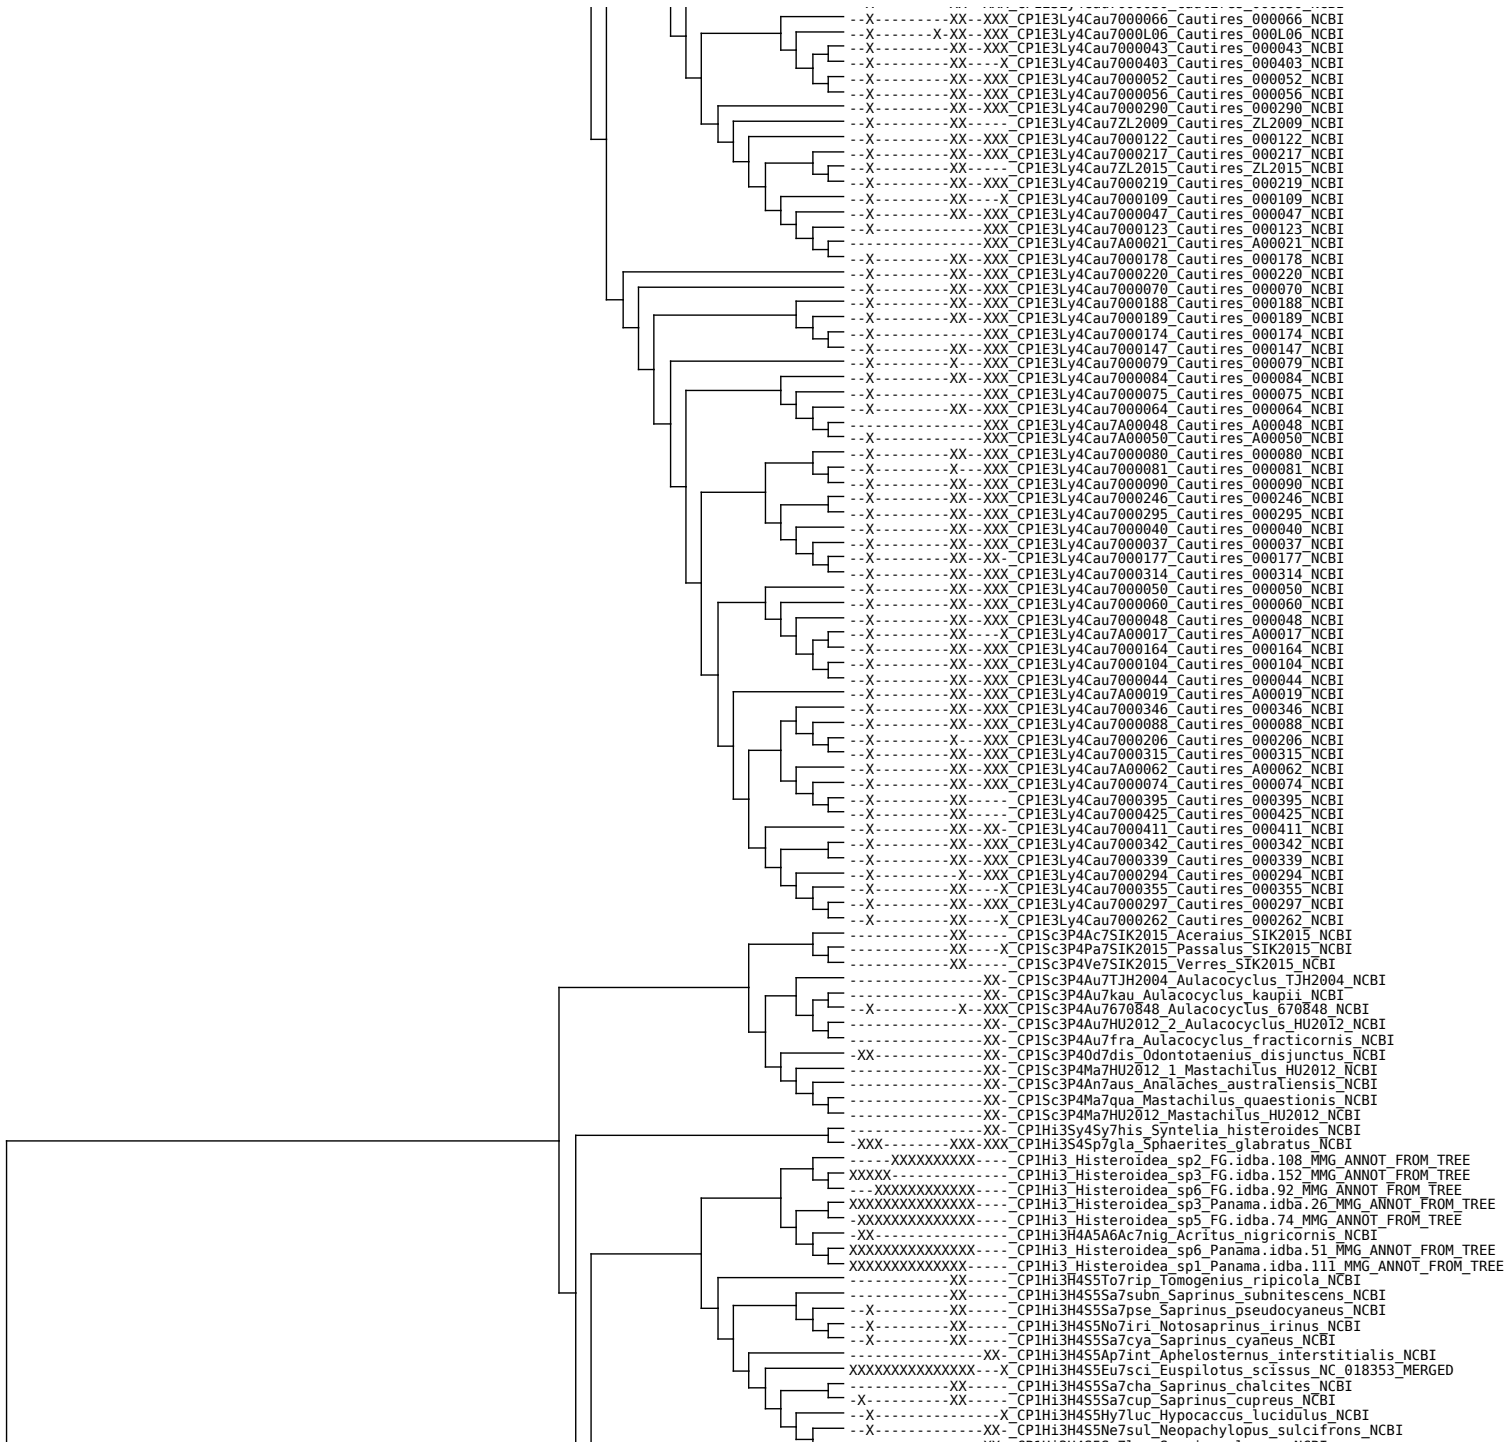

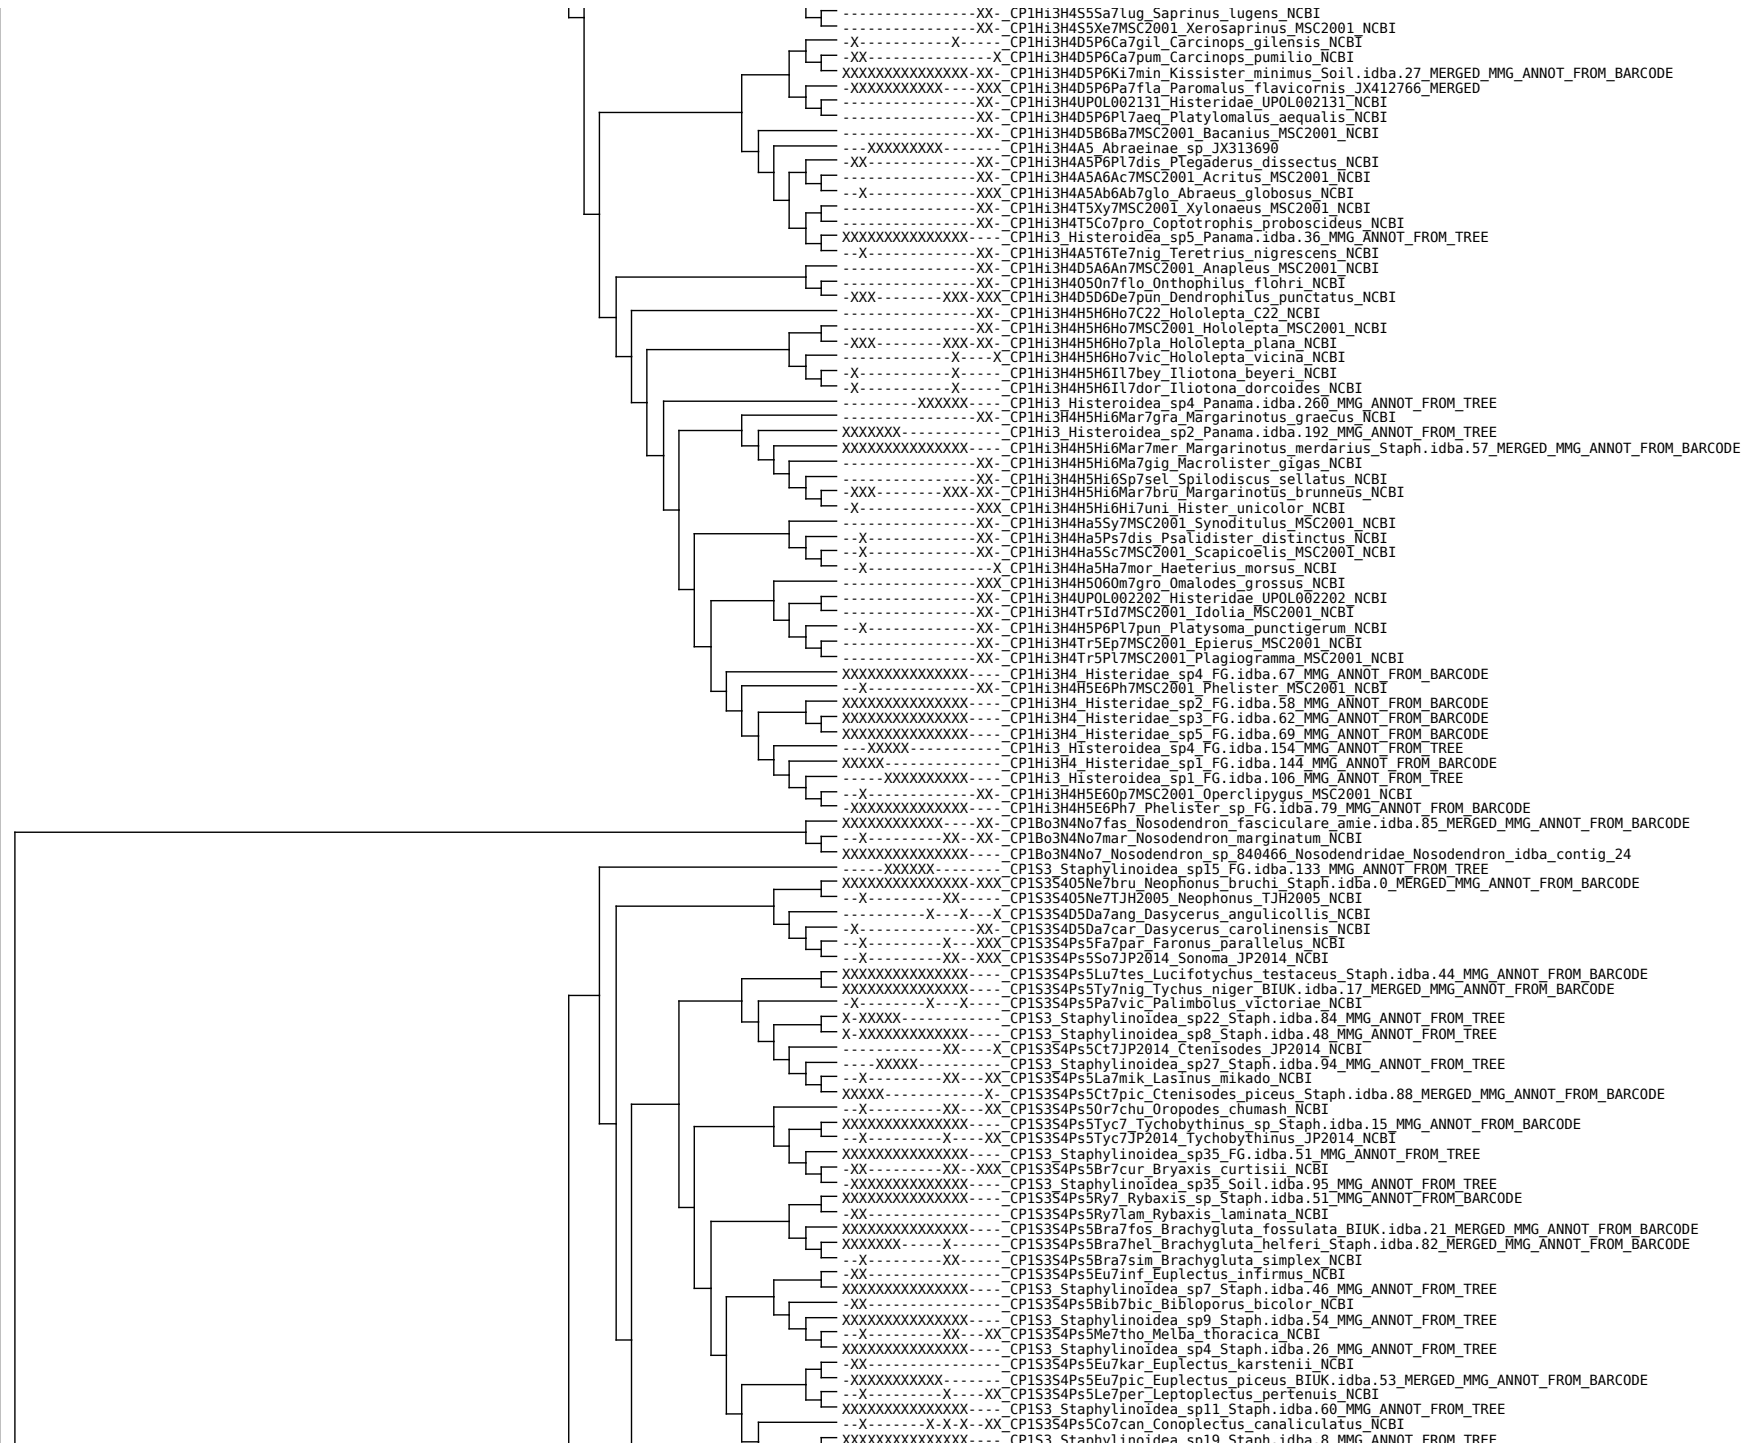

XXXXXXXXXXXXXXXXX CP153\_Staphyloidea\_sp1\_Staph.idba.2\_MMG\_ANNOT\_FROM\_TREE  
XXXXXXXXXXXXXXXXX CP153\_Staphyloidea\_sp2\_Staph.idba.2I\_MMG\_ANNOT\_FROM\_TREE  
XXXXXXXXXXXXXXXXX CP153\_Staphyloidea\_sp6\_Staph.idba.4\_MMG\_ANNOT\_FROM\_TREE  
-X- CP153S4Ps5Ba7lin\_Batrisodes\_lineaticollis\_NCBI  
XXXXXXXXXXXXXXXXX CP153\_Staphyloidea\_sp5\_Staph.idba.3\_MMG\_ANNOT\_FROM\_TREE  
-X- CP153S4Ps5Py7JP2014\_Pyxidicerina\_JP2014\_NCBI  
-X- CP153S4Ps5Ze7JP2014\_Zethopsus\_JP2014\_NCBI  
-X- CP153S4Ps5Ti7JP2014\_Tiracerus\_JP2014\_NCBI  
-X- CP153S4Ps5Ca7orb\_Caccoplectus\_orbis\_NCBI  
-X- CP153S4Ps5Rh7JP2014\_Rhytus\_JP2014\_NCBI  
-X- CP153S4Ps5Cu7JP2014\_Curculionellus\_JP2014\_NCBI  
-X- CP153S4Ps5Pse7JP2014\_Pselaphogenius\_JP2014\_NCBI  
-X- CP153S4Ps5Pseu7JP2014\_Pseudocerus\_JP2014\_NCBI  
-X- CP153S4Ps5Ana7JP2014\_Anaclasisger\_JP2014\_NCBI  
-X- CP153S4Ps5Dim7JP2014\_Dimerometopus\_JP2014\_NCBI  
-X- CP153S4Ps5Fu7JP2014\_1\_Fustiger\_JP2014\_NCBI  
-X- CP153S4Ps5Mir7JP2014\_Miroclaviger\_JP2014\_NCBI  
-X- CP153S4Ps5Fu7JP2014\_2\_Fustiger\_JP2014\_NCBI  
-X- CP153S4Ps5Fu7JP2014\_Fustiger\_JP2014\_NCBI  
-X- CP153S4Ps5And7sah\_Andasibe\_sahondrae\_NCBI  
-X- CP153S4Ps5Fu7kna\_Fustiger\_knausii\_NCBI  
-X- CP153S4Ps5Fu7fuc\_Fustiger\_fuchsii\_NCBI  
-X- CP153S4Ps5Th7JP2014\_Theocerus\_JP2014\_NCBI  
-X- CP153S4Ps5Ap7JP2014\_Apoderiger\_JP2014\_NCBI  
-X- CP153S4Ps5Ne7JP2014\_Nearticerodes\_JP2014\_NCBI  
-X- CP153S4Ps5Ha7JP2014\_Hadrophorus\_JP2014\_NCBI  
-X- CP153S4Ps5JP2014\_Pselaphinae\_JP2014\_NCBI  
-X- CP153S4Ps5Se7sik\_Semiclaviger\_sikorae\_NCBI  
-X- CP153S4Ps5Mi7JP2014\_Micrapoderiger\_JP2014\_NCBI  
-X- CP153S4Ps5Tr17JP2014\_Trichomatosis\_JP2014\_NCBI  
-X- CP153S4Ps5M17min\_Micrapoderiger\_minutissimus\_NCBI  
-X- CP153S4Ps5Ra7JP2014\_Radama\_JP2014\_NCBI  
-X- CP153S4Ps5Dia7fos\_Diartiger\_fossulatus\_NCBI  
XXXXXXXXXXXXXXXXX CP153\_Staphyloidea\_sp13\_Staph.idba.7\_MMG\_ANNOT\_FROM\_TREE  
-X- CP153S4Ps5Tr7red\_Triartiger\_reductus\_NCBI  
-X- CP153S4Ps5Dia7spi\_Diartiger\_spinipes\_NCBI  
-X- CP153S4Ps5Ce7ret\_Cerylambus\_reticulatus\_NCBI  
-X- CP153S4Ps5Ad7tay\_Adranes\_taylori\_NCBI  
-X- CP153S4Ps5Ad7coe\_Adranes\_coecus\_NCBI  
-X- CP153S4Ps5Cl7lon\_Claviger\_longicornis\_NCBI  
-X- CP153S4Ps5Cl7tes\_Claviger\_testaceus\_NCBI  
-X- CP153S4Ps5JP2014\_1\_Pselaphinae\_JP2014\_NCBI  
-X- CP153S4Ps5Ma7JP2014\_1\_Mastiger\_JP2014\_NCBI  
-X- CP153S4Ps5Ma7JP2014\_Mastiger\_JP2014\_NCBI  
-X- CP153S4Eu5Ed7VG2008\_Edaphus\_VG2008\_NCBI  
-X- CP153S4Eu5Al7VG2008\_Alzadaesthetus\_VG2008\_NCBI  
-X- CP153S4Eu5Eu7bip\_Euaesthetus\_bipunctatus\_NCBI  
XXXXXXXXXXXXXXXXX CP153S4Eu5Eu7ruf\_Euaesthetus\_ruficapillus\_Staph.idba.45\_MERGED\_MMG\_ANNOT\_FROM\_BARCODE  
-X- CP153S4St5St7pil\_Stenus\_pilosiventris\_NCBI  
-X- CP153S4St5St7inte\_Stenus\_intermedius\_NCBI  
-X- CP153S4St5St7mel\_Stenus\_melanarius\_NCBI  
-X- CP153S4St5St7nit\_Stenus\_nitens\_NCBI  
-X- CP153S4St5St7can\_Stenus\_canaliculatus\_NCBI  
-X- CP153S4St5St7boo\_Stenus\_boops\_NCBI  
-X- CP153S4St5St7mor\_Stenus\_morio\_NCBI  
-X- CP153S4St5St7pub\_Stenus\_puberulus\_NCBI  
-X- CP153S4St5St7arg\_Stenus\_argus\_NCBI  
-X- CP153S4St5St7eur\_Stenus\_eurous\_NCBI  
-X- CP153S4St5St7tenu\_Stenus\_tenuimargo\_NCBI  
-X- CP153S4St5St7rug\_Stenus\_rugipennis\_NCBI  
-X- CP153S4St5St7proc\_Stenus\_proclinatoris\_NCBI  
-X- CP153S4St5St7cor\_Stenus\_coronatus\_NCBI  
-X- CP153S4St5St7par\_Stenus\_paradecens\_NCBI  
-X- CP153S4St5St7pal\_Stenus\_palustris\_NCBI  
-X- CP153S4St5St7imp\_Stenus\_impressus\_NCBI  
-X- CP153S4St5St7lew\_Stenus\_lewisius\_NCBI  
-X- CP153S4St5St7bim\_Stenus\_bimaculatus\_NCBI  
-X- CP153S4St5St7hum\_Stenus\_humilis\_NCBI  
-X- CP153S4St5St7jun\_Stenus\_juno\_NCBI  
XXXXXXXXXXXXXXXXX CP153S4St5St7cla\_Stenus\_clavicornis\_2VGB.idba.1\_MERGED\_MMG\_ANNOT\_FROM\_BARCODE  
-X- CP153S4St5St7pro\_Stenus\_providus\_NCBI  
-X- CP153S4St5St7ins\_Stenus\_insignatus\_NCBI  
-X- CP153S4St5St7ten\_Stenus\_tenuipes\_NCBI  
-X- CP153S4St5St7ali\_Stenus\_alienus\_NCBI  
-X- CP153S4St5St7big\_Stenus\_biguttatus\_NCBI  
XXXXXXXXXXXXXXXXX CP153S4St5St7com\_Stenus\_comma\_Staph.idba.58\_MERGED\_MMG\_ANNOT\_FROM\_BARCODE  
-X- CP153S4St5St7BMNH668192\_Stenus\_BMNH668192\_NCBI  
-X- CP153S4St5St7BMNH668148\_Stenus\_BMNH668148\_NCBI  
-X- CP153S4St5St7nit\_Dianous\_nitidulus\_NCBI  
-X- CP153S4St5St7gut\_Stenus\_guttula\_NCBI  
-X- CP153S4St5St7fos\_Stenus\_fossulatus\_NCBI  
-X- CP153S4St5St7fel\_Dianous\_fellowesi\_NCBI  
-X- CP153S4St5St7hai\_Dianous\_hainanensis\_NCBI  
-X- CP153S4St5St7fen\_Dianous\_fengtingae\_NCBI  
-X- CP153S4St5St7obl\_Dianous\_obliquenotatus\_NCBI  
-X- CP153S4St5St7alt\_Dianous\_alternans\_NCBI  
-X- CP153S4St5St7ele\_Dianous\_elegantulus\_NCBI  
-X- CP153S4St5St7pun\_Dianous\_punctiventris\_NCBI  
-X- CP153S4St5St7sri\_Dianous\_srivichaii\_NCBI  
-X- CP153S4St5St7coe\_Dianous\_coerulescens\_NCBI  
-X- CP153S4St5St7oce\_Dianous\_ocellifer\_NCBI  
-X- CP153S4St5St7ver\_Dianous\_verticosus\_NCBI  
-X- CP153S4St5St7pse\_Dianous\_pseudacutus\_NCBI  
-X- CP153S4St5St7and\_Dianous\_andrewesi\_NCBI  
-X- CP153S4St5St70FS2009\_Dianous\_0FS2009\_NCBI



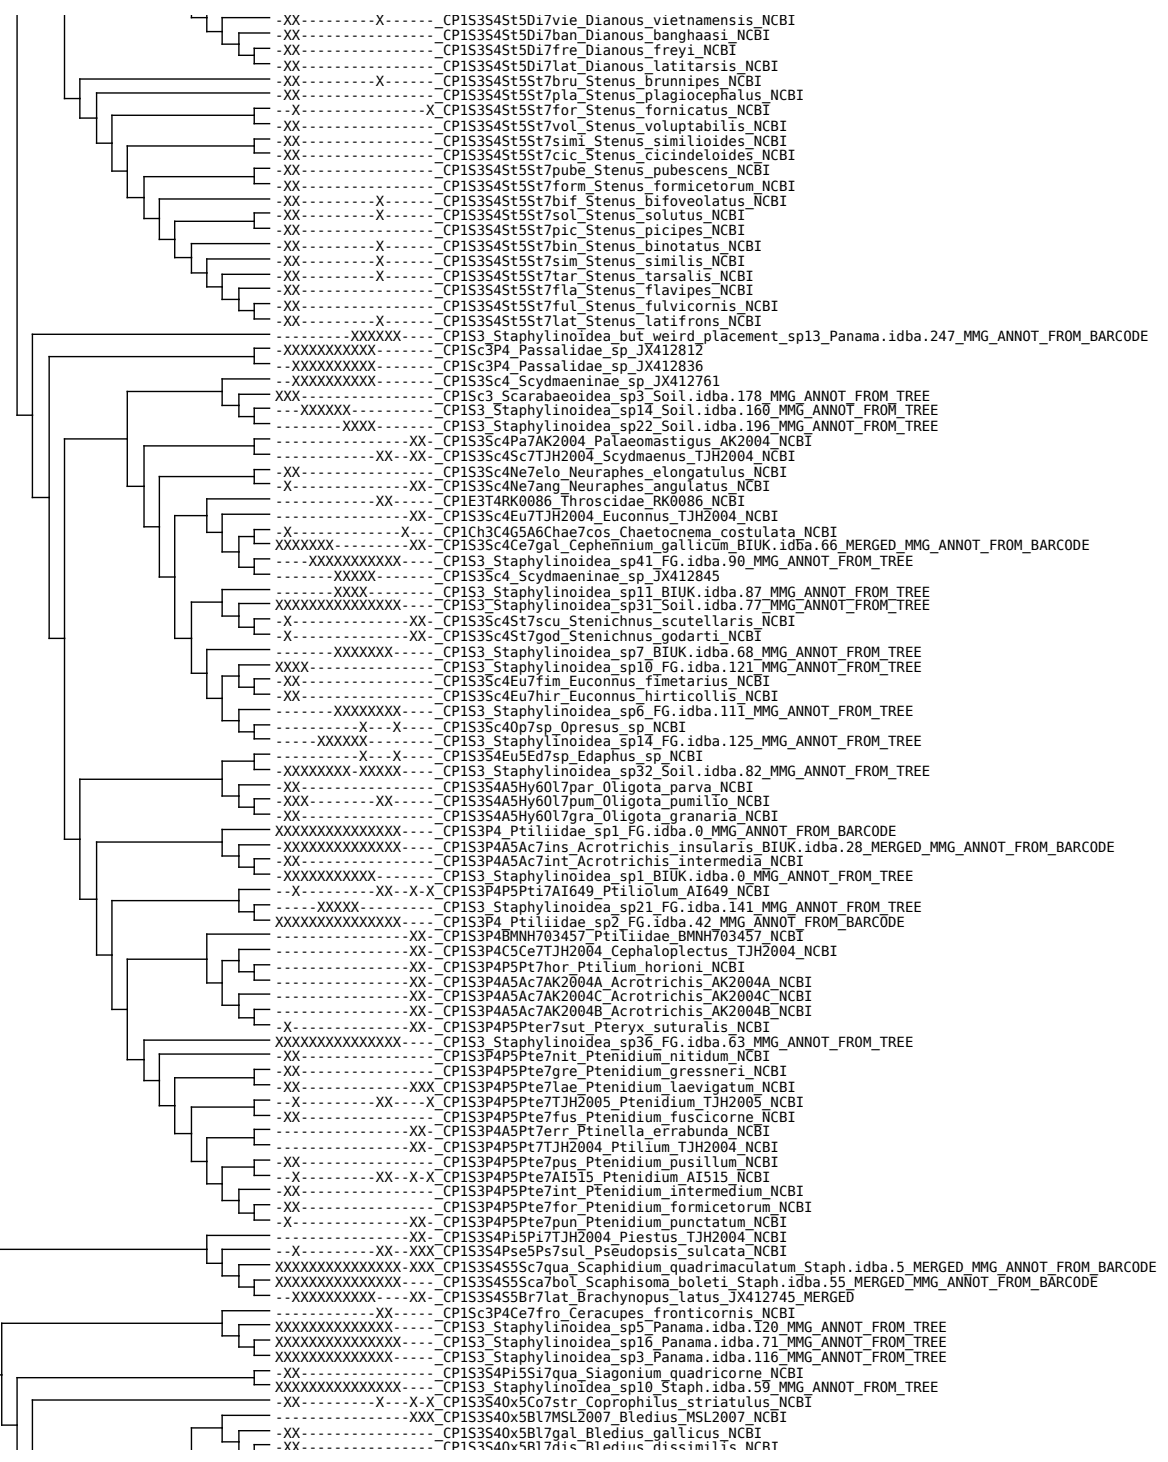

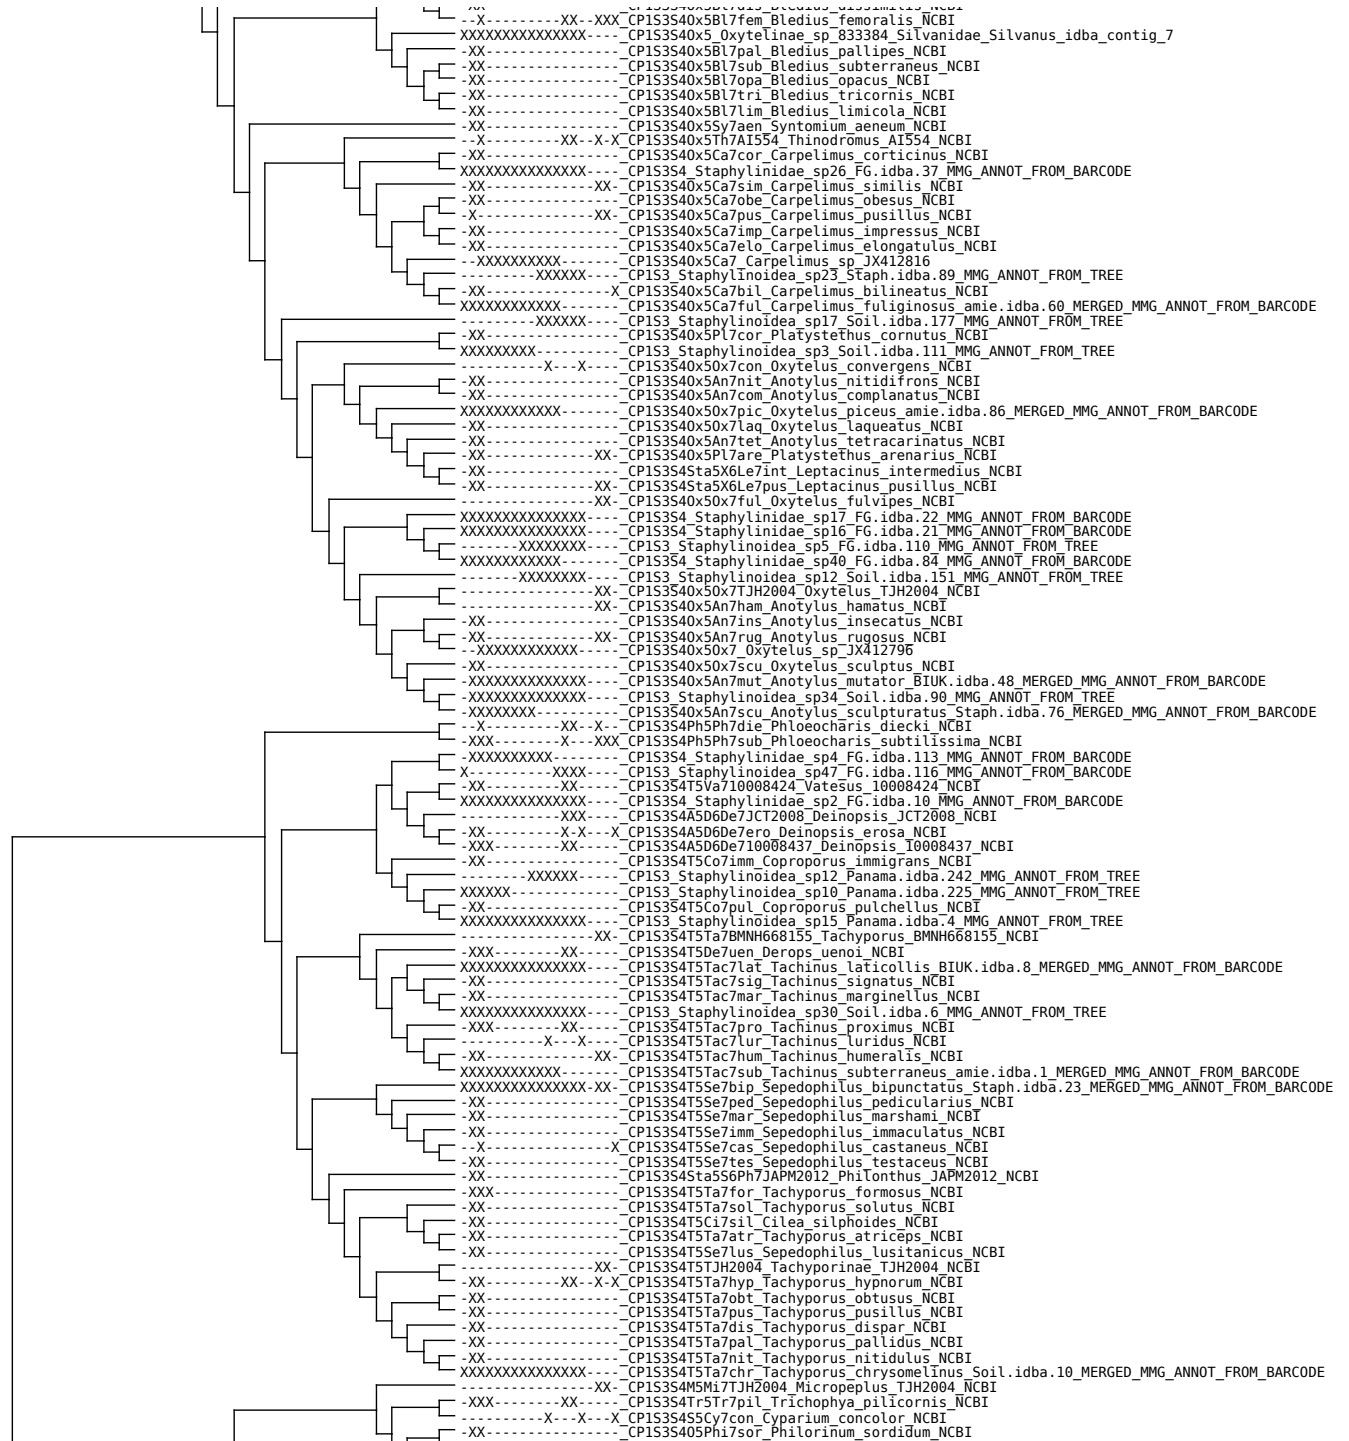

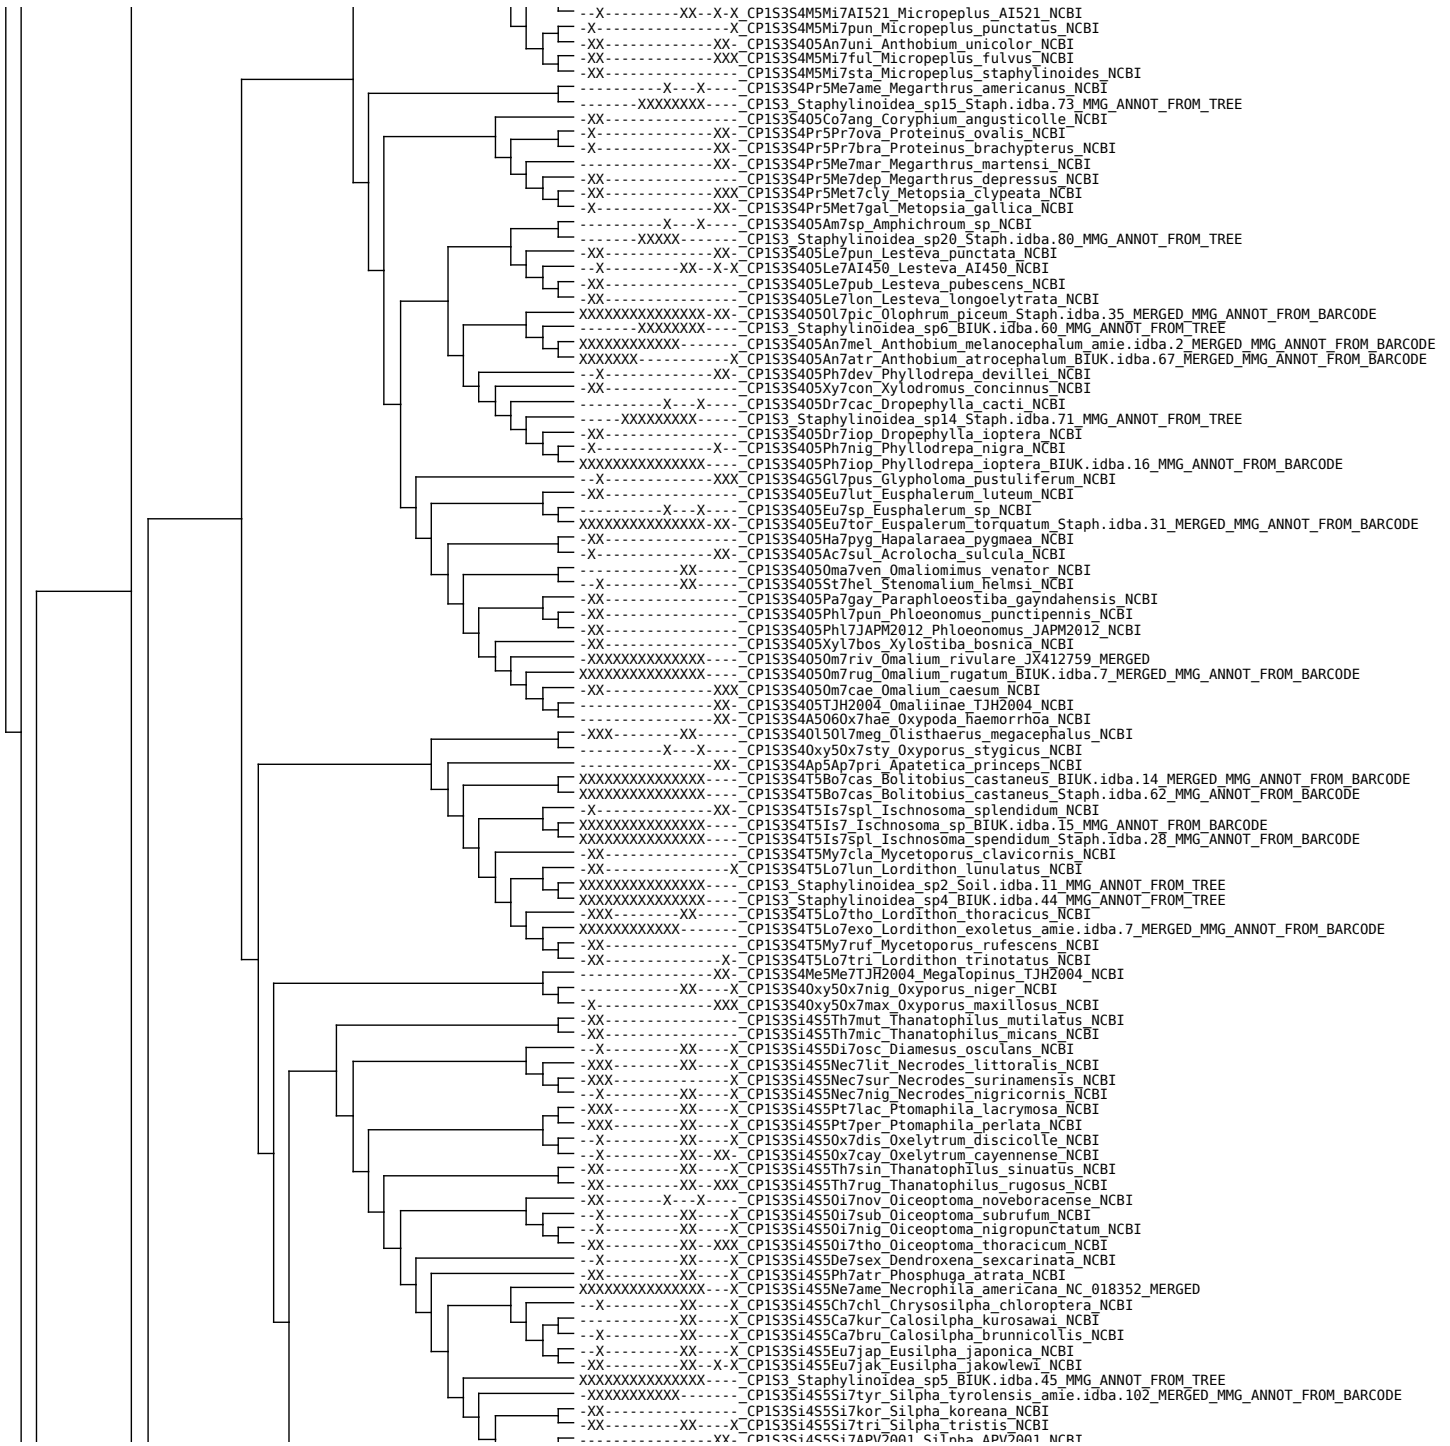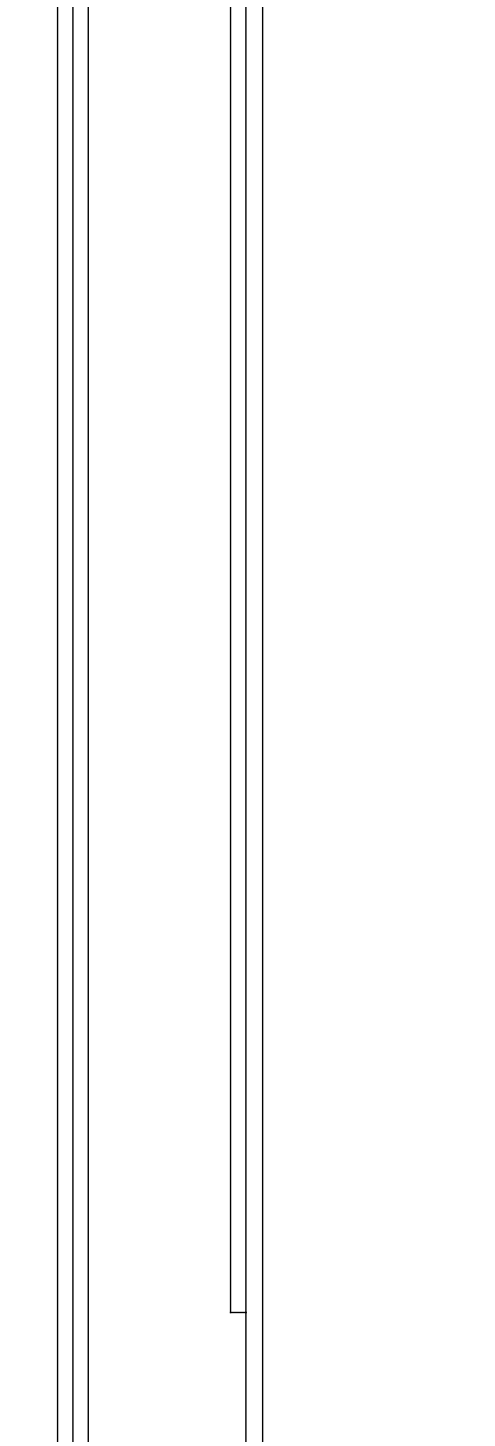

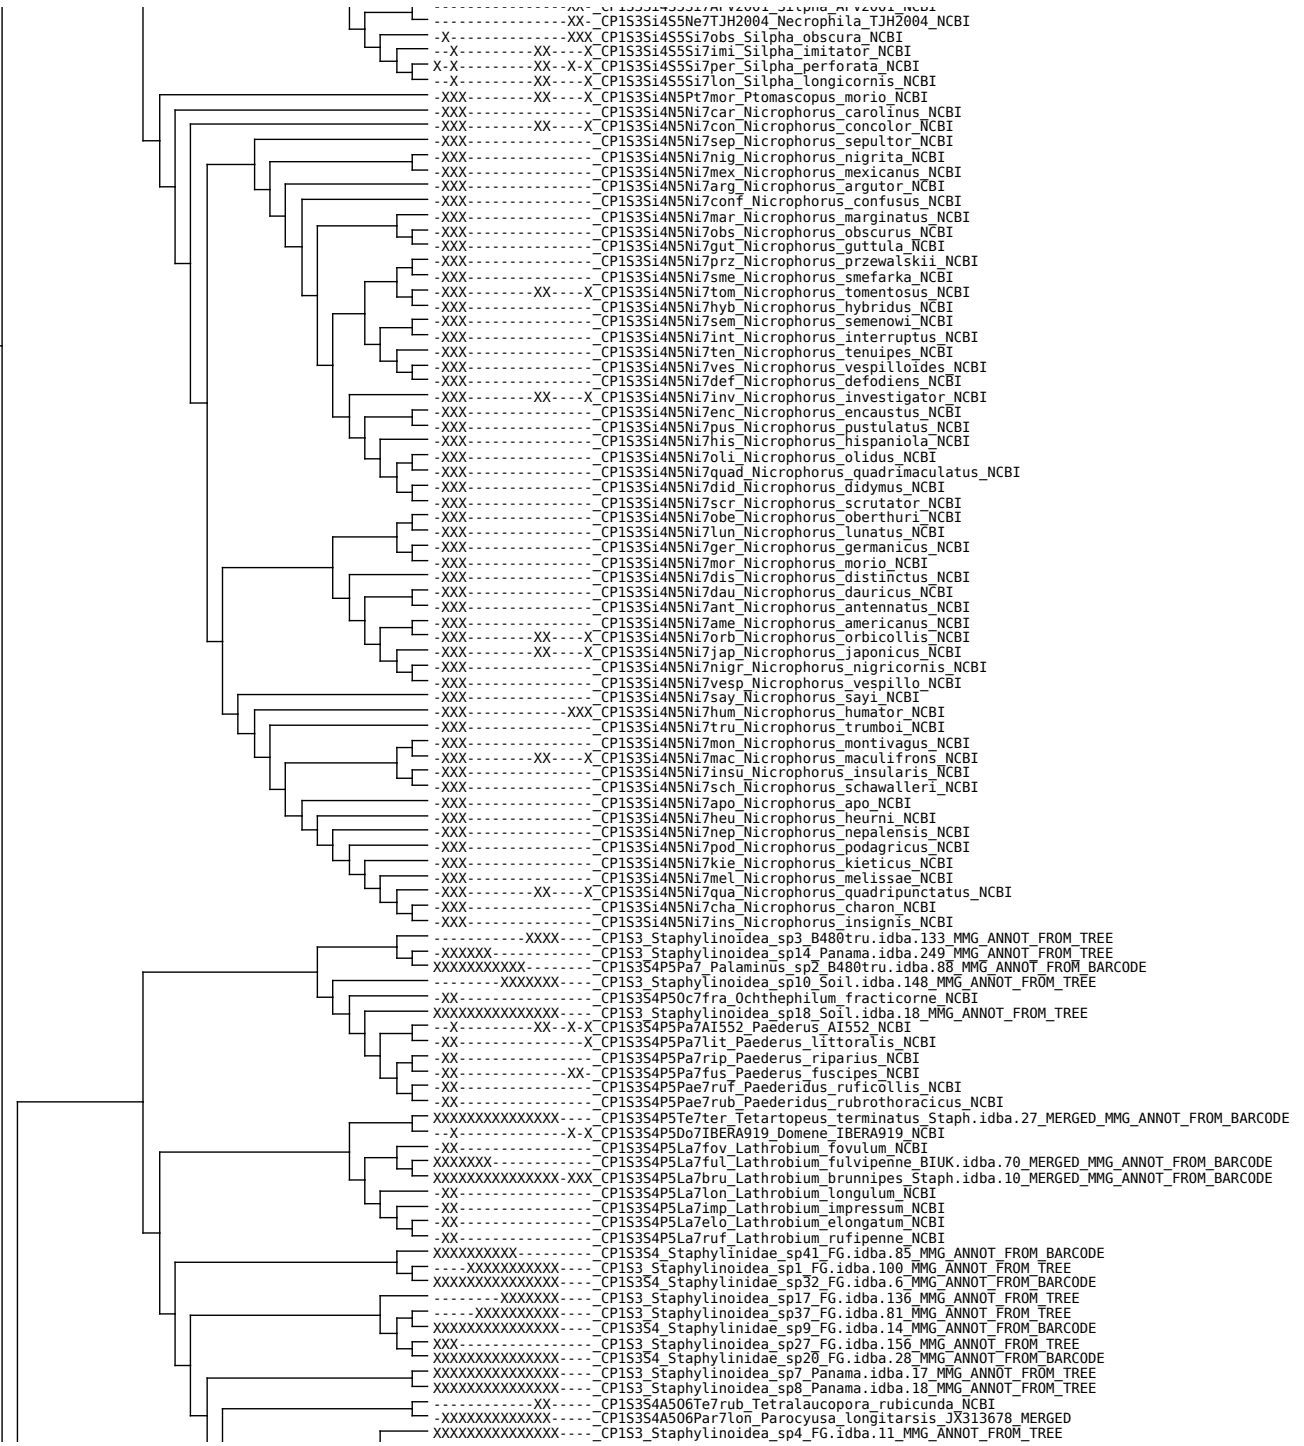

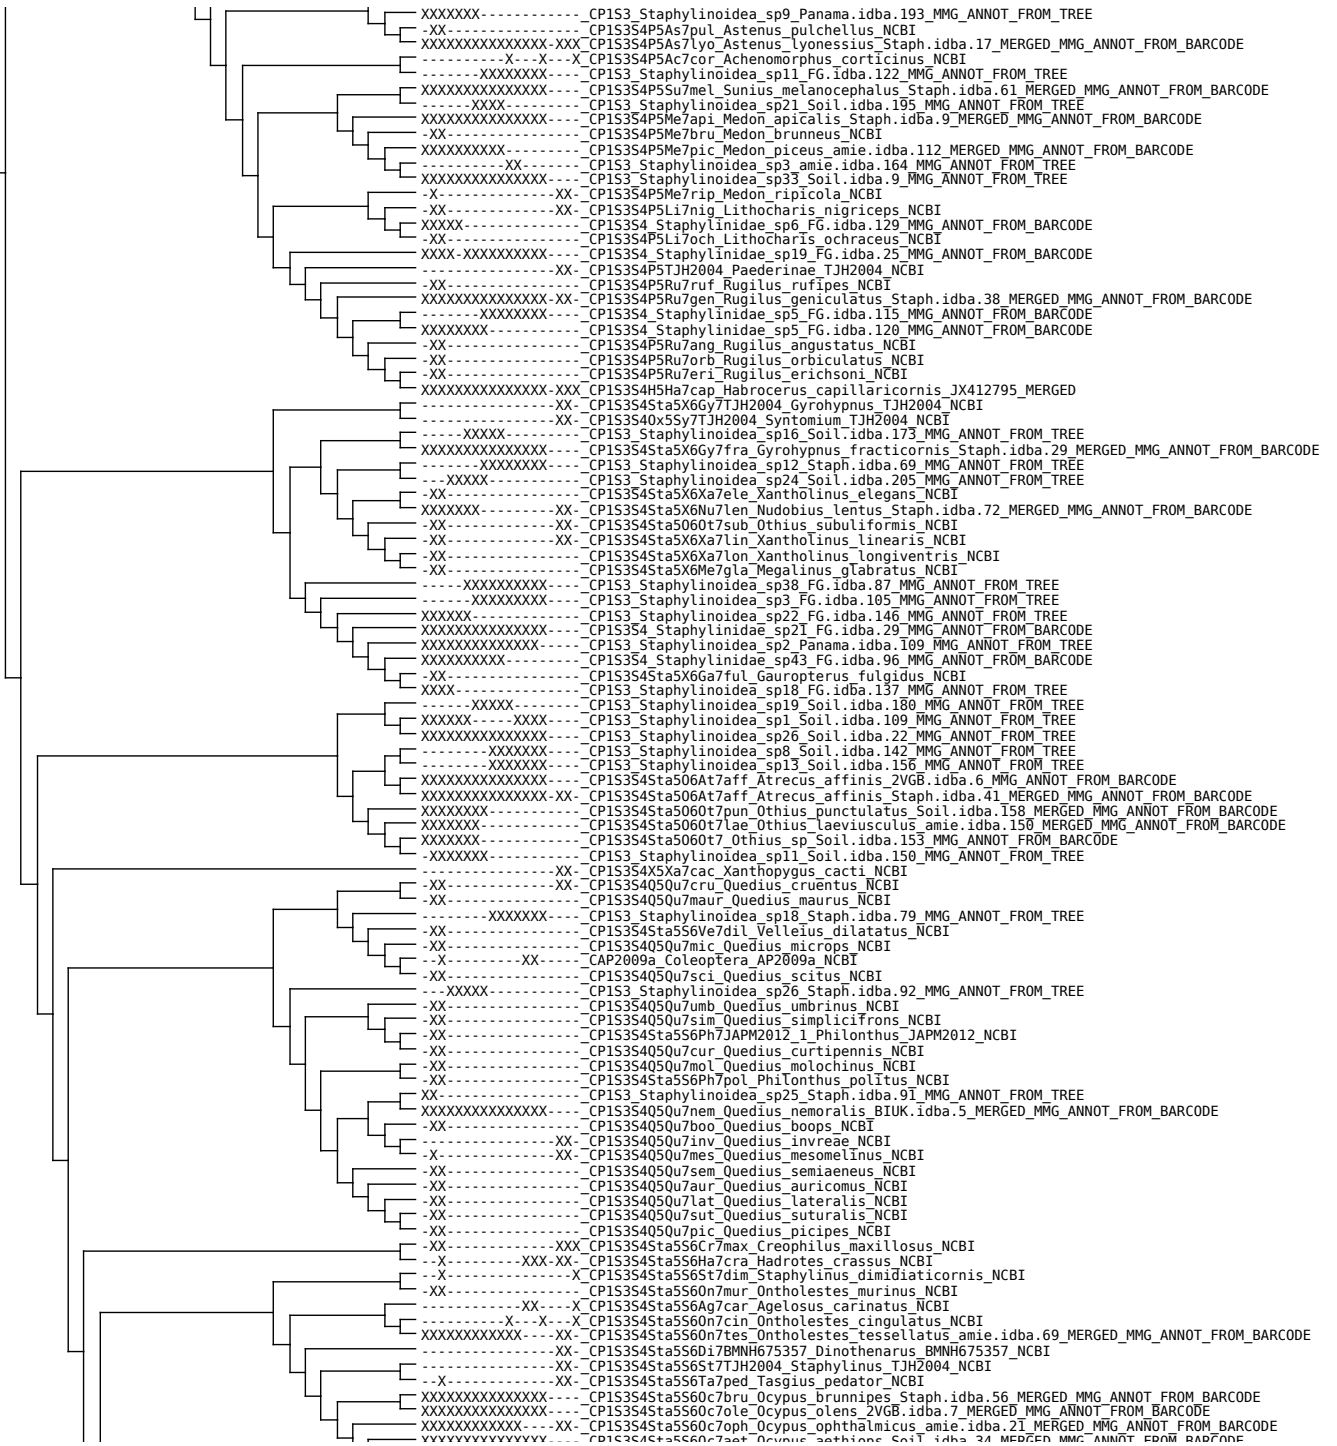

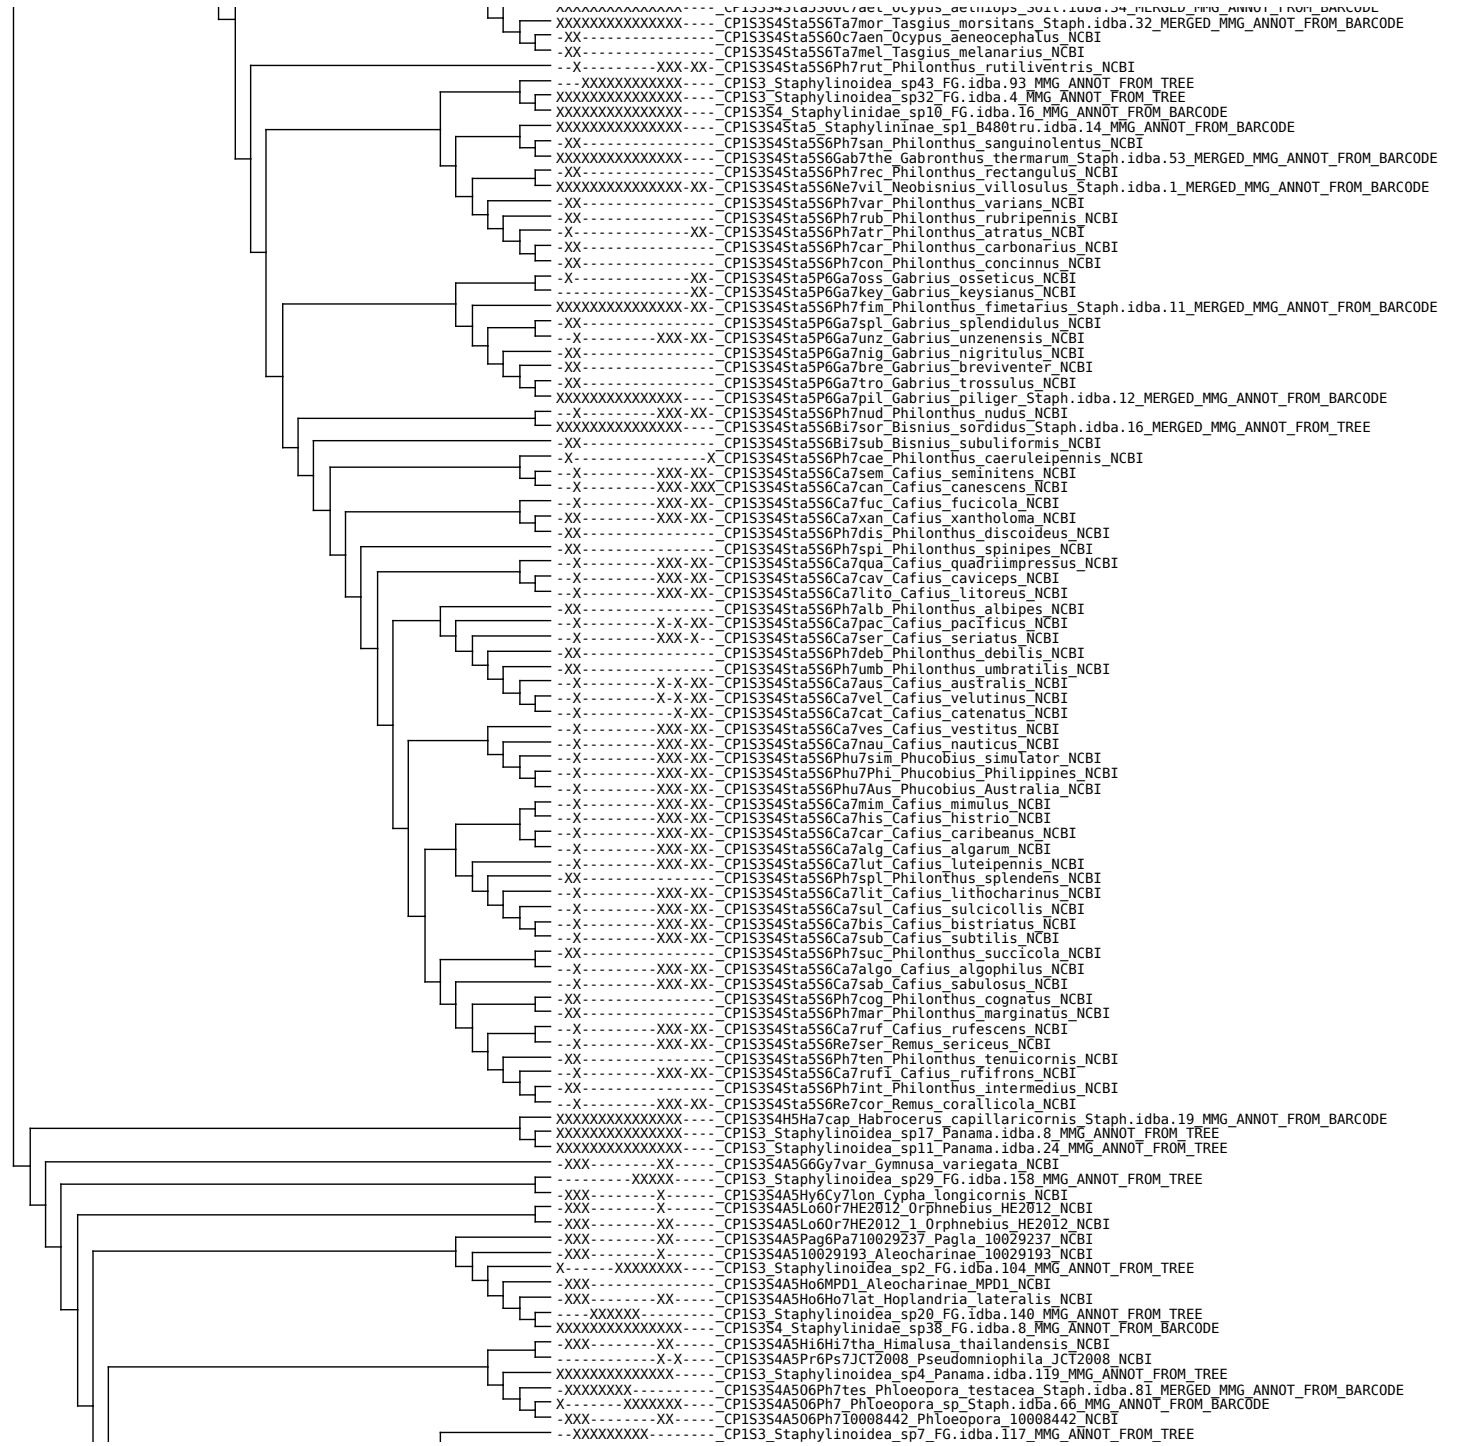

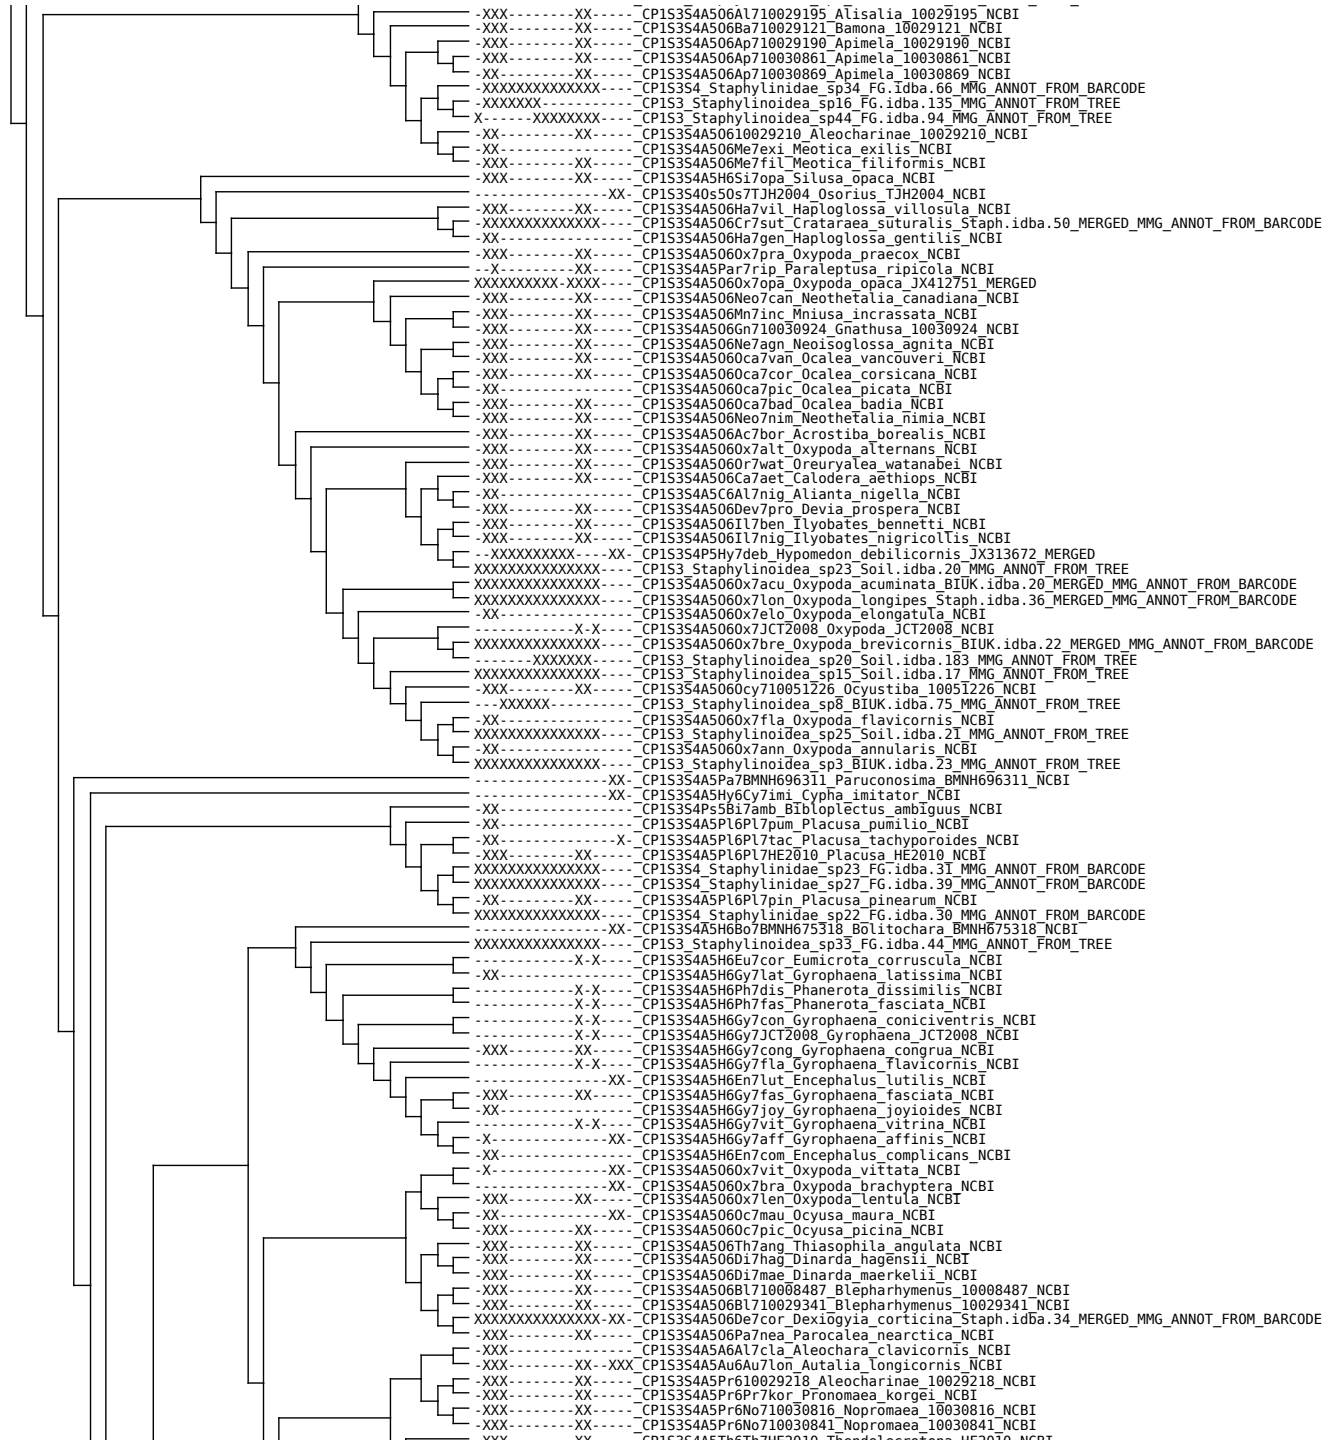

---XX-----XX--- CP13354A510011/ME2010\_innendectrotoma\_ME2010\_NCBI  
---XX-----XX--- CP13354A5Pr6My7bre Myllaena brevicornis NCBI  
---XX-----XX--- CP13354A5Pr6My7dub Myllaena dubia NCBI  
---XX-----XX--- CP13354A5Pr6My7elo Myllaena elongata NCBI  
---X-----XX--- CP13354A5Pr6My7inf Myllaena infuscata NCBI  
---XXX-----XX--- CP13354A5Pr6My7aud Myllaena audax NCBI  
XXXXXXXXXXXXXXXX CP13354 Staphylinidae\_sp37\_FG.idba.72 MMG\_ANNOT\_FROM\_BARCODE  
XXXXXXXXXXXXXXXX CP13354 Staphylinidae\_sp36\_FG.idba.7 MMG\_ANNOT\_FROM\_BARCODE  
---X-----XX--- CP13354A5P6Ph7bal Phytosus balticus NCBI  
---XXX-----XX--- CP13354A5D16i7mer Diglotta mersa NCBI  
---XXX-----X--- CP13354A5H6An7cus Anomognathus cuspidatus NCBI  
XXXXXXXXXXXXXXXX CP133 Staphylinidae\_sp6\_Panama.idba.125 MMG\_ANNOT\_FROM\_TREE  
---XXXXXXXX--- CP133 Staphylinidae\_sp25\_FG.idba.153 MMG\_ANNOT\_FROM\_TREE  
---XXX-----X--- CP13354A506My710029269 Myrmobiota\_10029269 NCBI  
---X-----X-XX--- CP13354A5L6Sa7kor Salinamexus koreanus NCBI  
---X-----XX--- CP13354A5At67lon Atheta longicornis NCBI  
---XXX-----XX--- CP13354A506B17cor Btepharhymenus corsicus NCBI  
---XXX-----XX--- CP13354A5Hyg0H7dim Hygronoma dimidiata NCBI  
---X-----X-XX--- CP13354A5H6S17JCT2008 Stictalia JCT2008 NCBI  
---XXX-----XX--- CP13354A5H6S17mar Silusida marginella NCBI  
---XX-----XX--- CP13354A5H6Bo7obl Bolitochara obliqua NCBI  
---XX-----XX--- CP13354A5H6Bo7bel Bolitochara bella NCBI  
---XXX-----XX--- CP13354A5H6Bo7pul Bolitochara pulchra NCBI  
---XX-----XX--- CP13354A5H6Bo7luc Bolitochara lucida NCBI  
---X-----X-XX--- CP13354A5L6Ba7chi Baeostethus chiltoni NCBI  
---X-----X-XX--- CP13354A5L6Ia7zea Ianmoorea zealandica NCBI  
---XXX-----XX-XX--- CP13354A5L6Am7mag Amblopusa magna NCBI  
---X-----X-XX--- CP13354A5L6Am7ala Amblopusa alaskana NCBI  
---X-----X-XX--- CP13354A5L6Ha7aeq Halorhadinus aequalis NCBI  
---X-----X-XX--- CP13354A5L6Ha7ina Halorhadinus inaequalis NCBI  
---X-----X-XX--- CP13354A5L6Pa7bor Paramblopusa borealis NCBI  
---X-----X-XX--- CP13354A5L6Pa7eoa Paramblopusa eoa NCBI  
---X-----X-XX--- CP13354A5L6L17lit Liparocephalus litoralis NCBI  
---XXX-----XXX-XXX--- CP13354A5L6L17cor Liparocephalus cordicollis NCBI  
---X-----X-XX--- CP13354A5L6D17pac Diaulota pacifica NCBI  
---X-----X-XX--- CP13354A5L6D17ful Diaulota fulviventris NCBI  
---X-----X-XX--- CP13354A5L6D17ala Diaulota alaskana NCBI  
---X-----X-XX--- CP13354A5L6D17aok Diaulota aoki NCBI  
---X-----X-XX--- CP13354A5L6D17uen Diaulota uenoi NCBI  
---XXX-----XXX-XX--- CP13354A5L6D17den Diaulota densissima NCBI  
---X-----X-XX--- CP13354A5L6D17van Diaulota vandykei NCBI  
---XX-----XX--- CP13354A5H6Le7fum Leptusa fumida NCBI  
---XX-----XX--- CP13354A5H6Le7ruf Leptusa ruficollis NCBI  
---X-----X-XX--- CP13354A5H6Le7kit Leptusa kitazawai NCBI  
XXXXXXXXXXXXXXXX CP13354A5B6Eu7opt Euryusa optabilis Staph.idba.22\_MERGED\_MMG\_ANNOT\_FROM\_BARCODE  
---XXX-----XX--- CP13354A5At6Dis7tor Discerota torrentum NCBI  
---XXX-----XX--- CP13354A5At6Tax710008503 Taxicera 10008503 NCBI  
---XXX-----XX--- CP13354A5At6Tax7tru Taxicera truncata NCBI  
---XXX-----XX-XX--- CP13354A5At6Ha7alg Halobrecta algophila NCBI  
---XXX-----XX--- CP13354A5At6Ha710002647 Halobrecta 10002647 NCBI  
---XXX-----XX--- CP13354A5At6Ha7HE2010 Halobrecta HE2010 NCBI  
---X-----XX--- CP13354A5H6Ha7atr Halmaeus atriceps NCBI  
XXXXXXXXXXXXXXXX CP133 Staphylinidae\_sp27\_So11.idba.23 MMG\_ANNOT\_FROM\_TREE  
---XXX-----XX--- CP13354A5A6Te7HE2012\_1 Tetrasticta HE2012 NCBI  
---XXX-----XX--- CP13354A5A6Te7HE2012\_2 Tetrasticta HE2012 NCBI  
---XXX-----XX--- CP13354A506A7bre Amarochara brevis NCBI  
---XXX-----XX--- CP13354A50610029199 Aleocharinae\_10029199 NCBI  
---XXX-----XX--- CP13354A506Am710029207 Amarochara 10029207 NCBI  
---XXX-----XX--- CP13354A50610029209 Aleocharinae\_10029209 NCBI  
---XXX-----XX--- CP13354A5A6A17for Aleochara fortipunctata NCBI  
---XXX-----XX--- CP13354A5A6A17mar Aleochara marginipennis NCBI  
XXXXXXXXXXXX CP13354 Staphylinidae\_sp3\_FG.idba.101 MMG\_ANNOT\_FROM\_BARCODE  
---XXX-----XX--- CP13354A5A6A17int Aleochara intricata NCBI  
---XXX-----XX--- CP13354A5A6A17tra Aleochara transvaalensis NCBI  
X-----XXXX--- CP133 Staphylinidae\_sp19\_FG.idba.139 MMG\_ANNOT\_FROM\_TREE  
---XXX-----XX--- CP13354A5A6A17oxy Aleochara oxypodia NCBI  
XXXXXXXXXXXXXXXX CP13354 Staphylinidae\_sp30\_FG.idba.56 MMG\_ANNOT\_FROM\_BARCODE  
XXXXXXXXXXXXXXXX CP13354 Staphylinidae\_sp31\_FG.idba.59 MMG\_ANNOT\_FROM\_BARCODE  
---XXX-----XXX--- CP13354A5A6A17lat Aleochara lata NCBI  
---XXX-----XX--- CP13354A5A6A17hae Aleochara haematoptera NCBI  
---XXX-----XX--- CP13354A5A6A17bre Aleochara brevipennis NCBI  
---XXX-----XX--- CP13354A5A6A17lati Aleochara laticornis NCBI  
---XXX-----XX--- CP13354A5A6A17chr Aleochara chrysorrhoea NCBI  
---XXX-----XX--- CP13354A5A6A17lus Aleochara lustrica NCBI  
---XXX-----XX--- CP13354A5A6A17nig Aleochara nigra NCBI  
---XXX-----XX--- CP13354A5A6A17cur Aleochara curta NCBI  
XXXXXXXXXXXXXXXX CP13354 Staphylinidae\_sp35\_FG.idba.68 MMG\_ANNOT\_FROM\_BARCODE  
XXXXXXXXXXXXXXXX CP13354 Staphylinidae\_sp33\_FG.idba.61 MMG\_ANNOT\_FROM\_BARCODE  
---XXX-----XX--- CP13354A5A6A17spad Aleochara spadicea NCBI  
---XXX-----XX--- CP13354A5A6A17lae Aleochara laevigata NCBI  
---XXX-----XX--- CP13354A5A6A17tri5 Aleochara tristis NCBI  
---XXX-----XX--- CP13354A5A6A17triv Aleochara trivialis NCBI  
---XXX-----XX--- CP13354A5A6A17mah Aleochara mahagi NCBI  
---XXX-----XX-XX--- CP13354A5A6T17mor Tinotus morion NCBI  
---XXX-----XX--- CP13354A5A6A17mil Aleochara milleri NCBI  
---XXX-----XX--- CP13354A5A6A17moe Aleochara moesta NCBI  
---XXX-----XX--- CP13354A5A6A17dep Aleochara depressa NCBI  
---XXX-----X--- CP13354A5A6A17val Aleochara valida NCBI  
---XXX-----XX--- CP13354A5A6A17inc Aleochara inconspicua NCBI  
---XXX-----XX--- CP13354A5A6A17hee Aleochara heeri NCBI  
---XXX-----XX--- CP13354A5A6A17bim Aleochara bimaculata NCBI  
---XXX-----XX--- CP13354A5A6A17not Aleochara notula NCBI  
---XXX-----X--- CP13354A5A6A17sul Aleochara sulcicollis NCBI  
---XXX-----XX--- CP13354A5A6A17squ Aleochara squalithorax NCBI  
---XXX-----XX--- CP13354A5A6A17bip Aleochara bipustulata NCBI  
---XXX-----XX--- CP13354A5A6A17bin Aleochara binotata NCBI



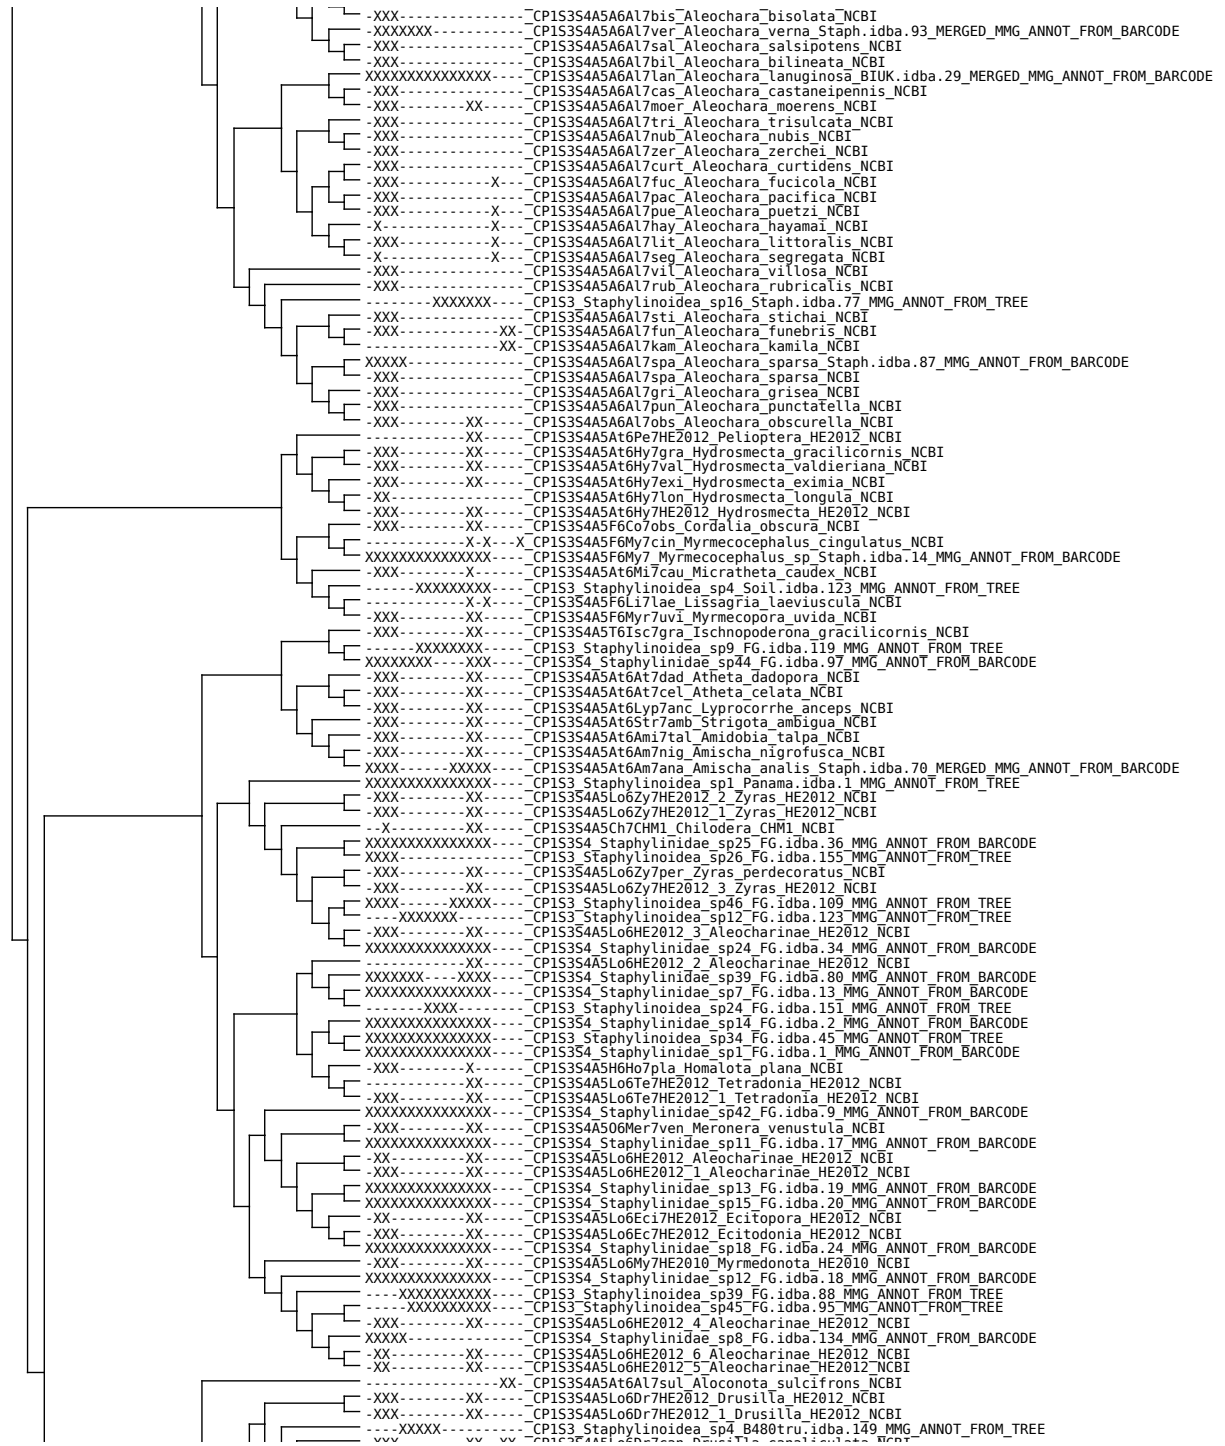

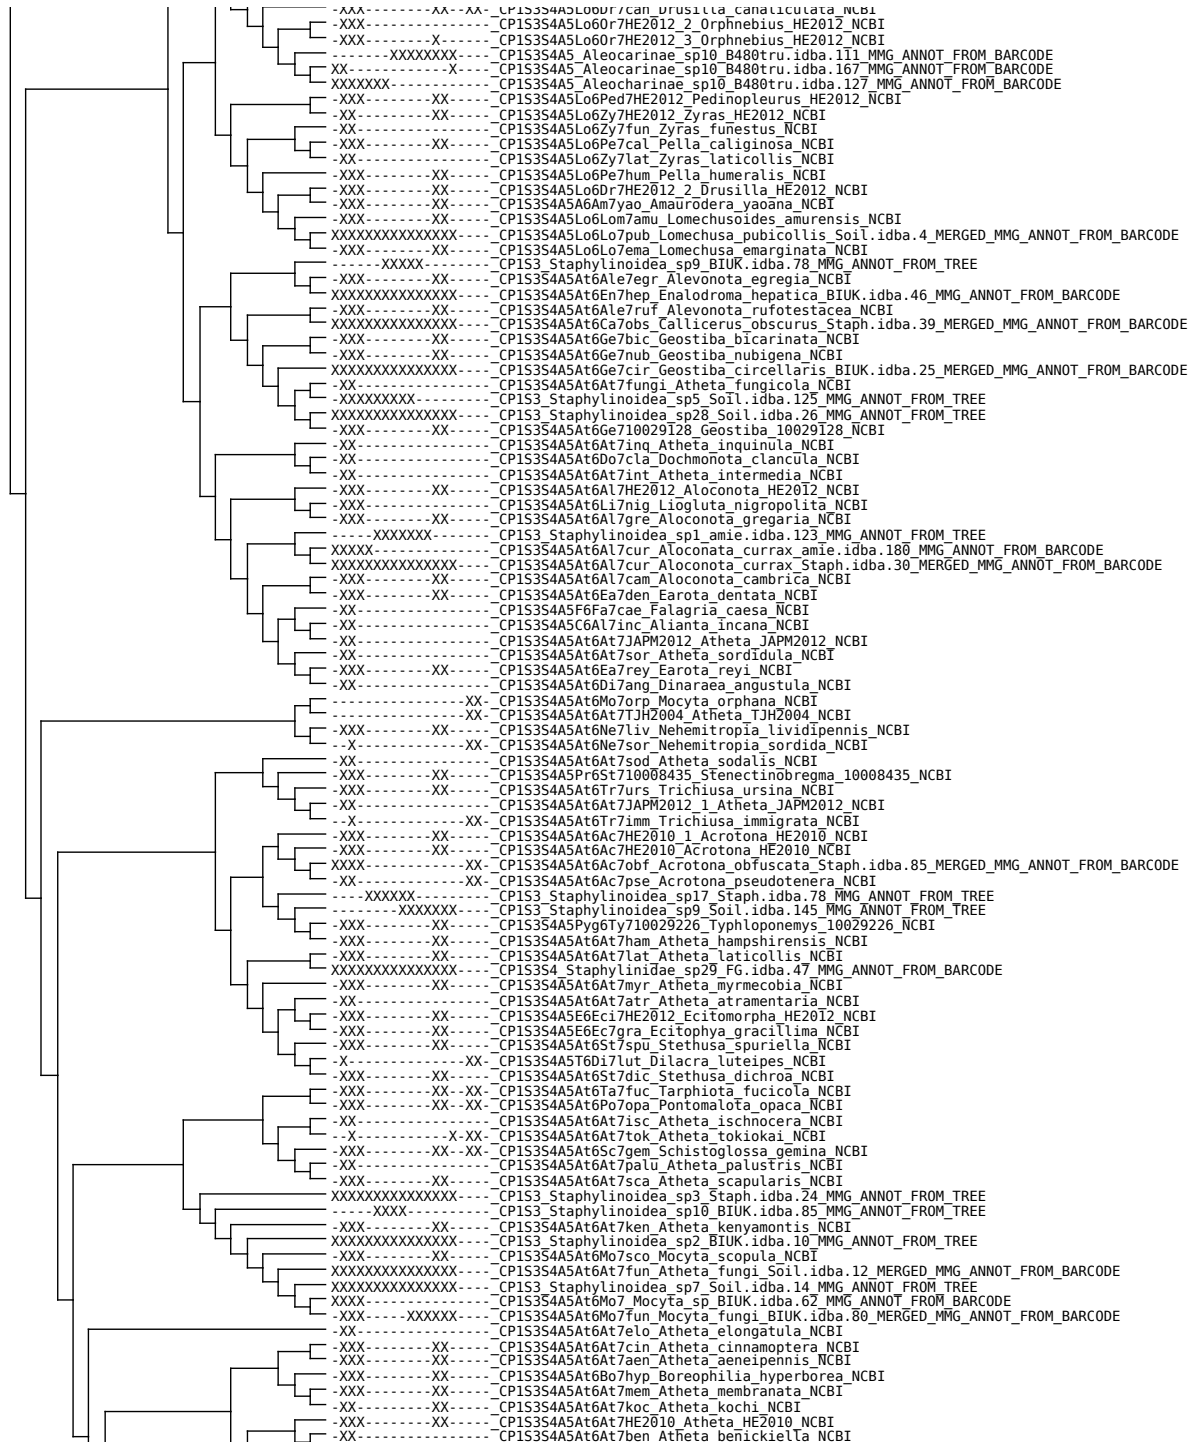

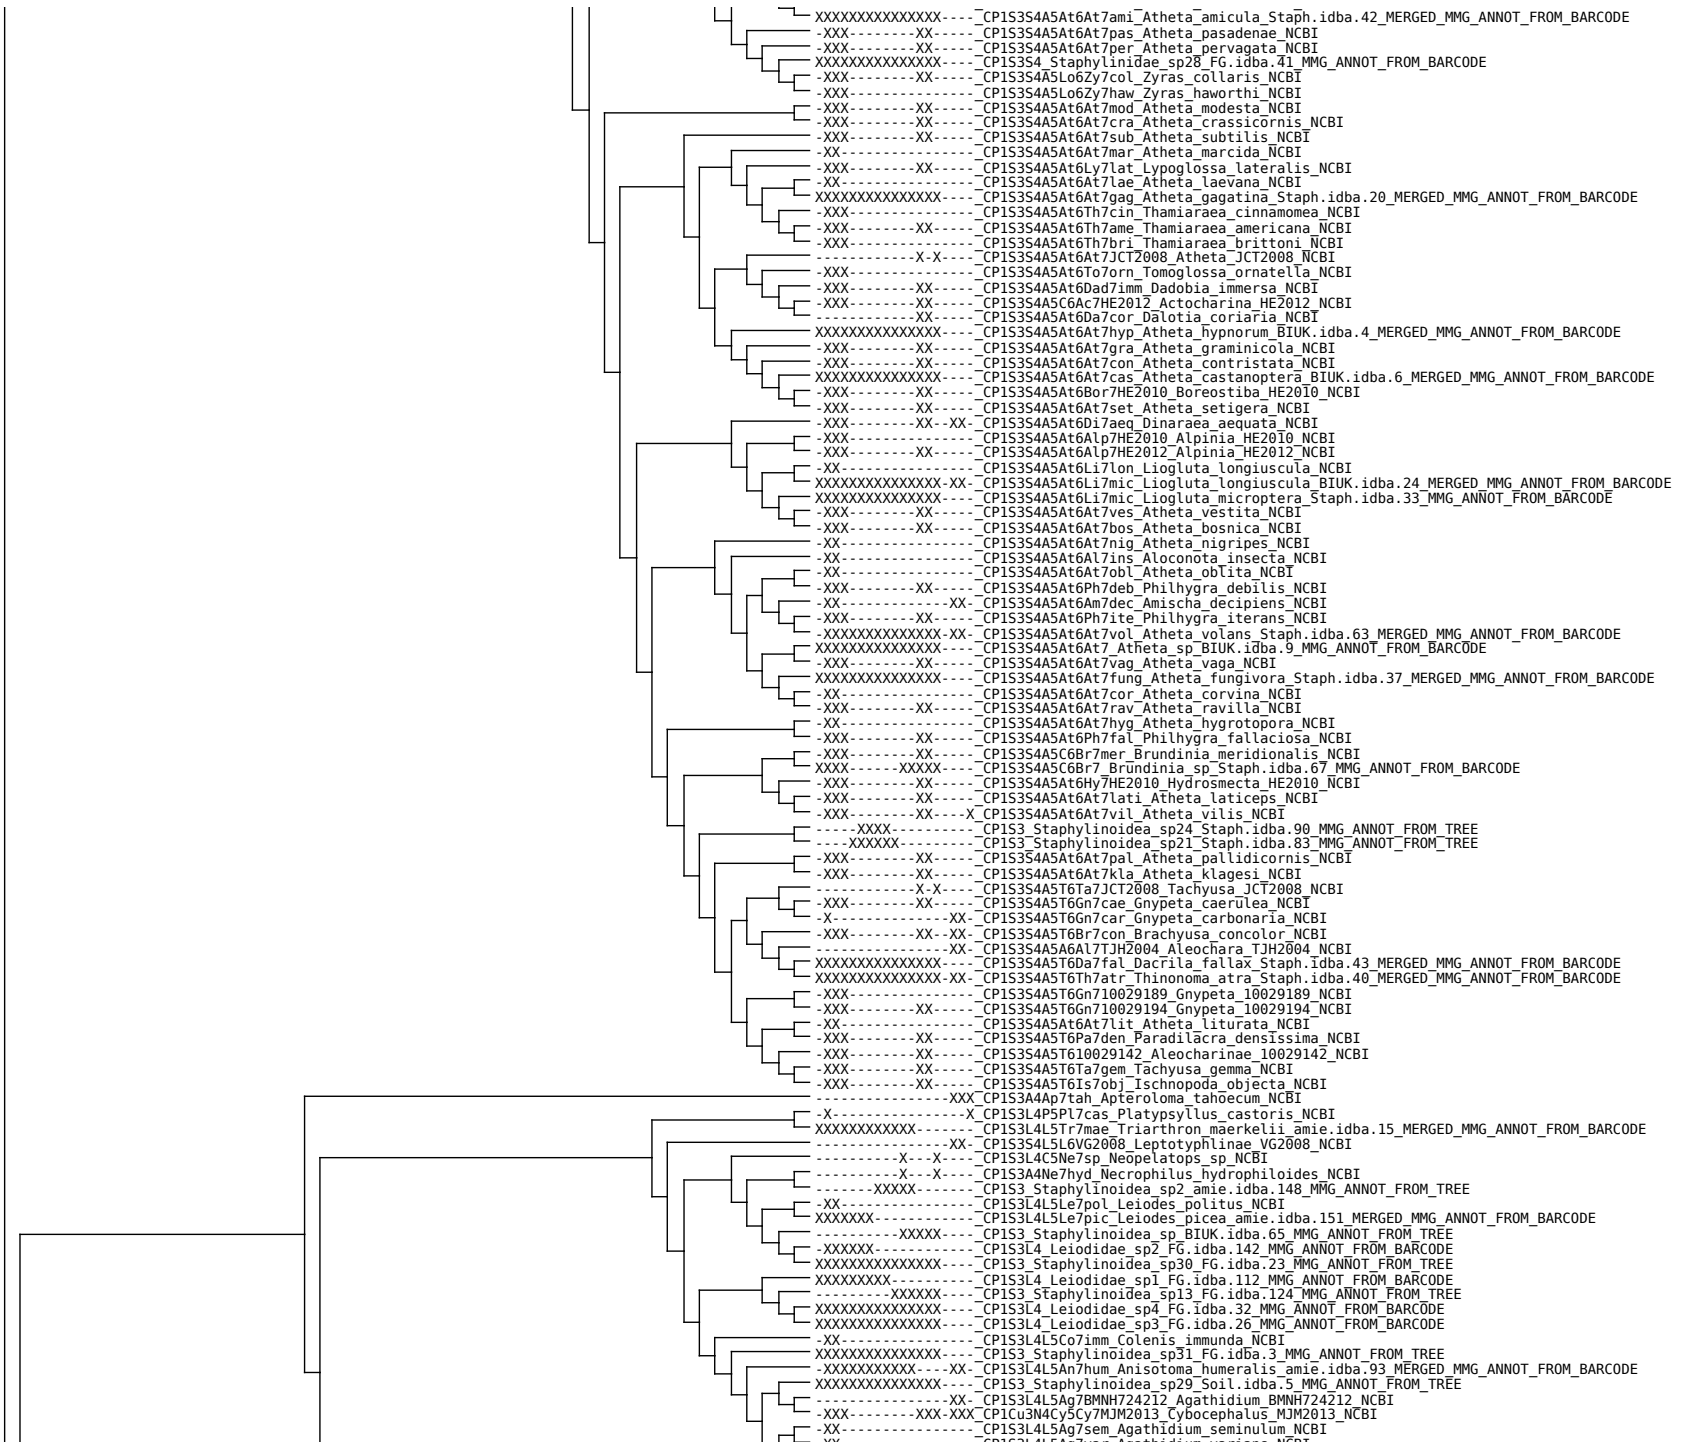

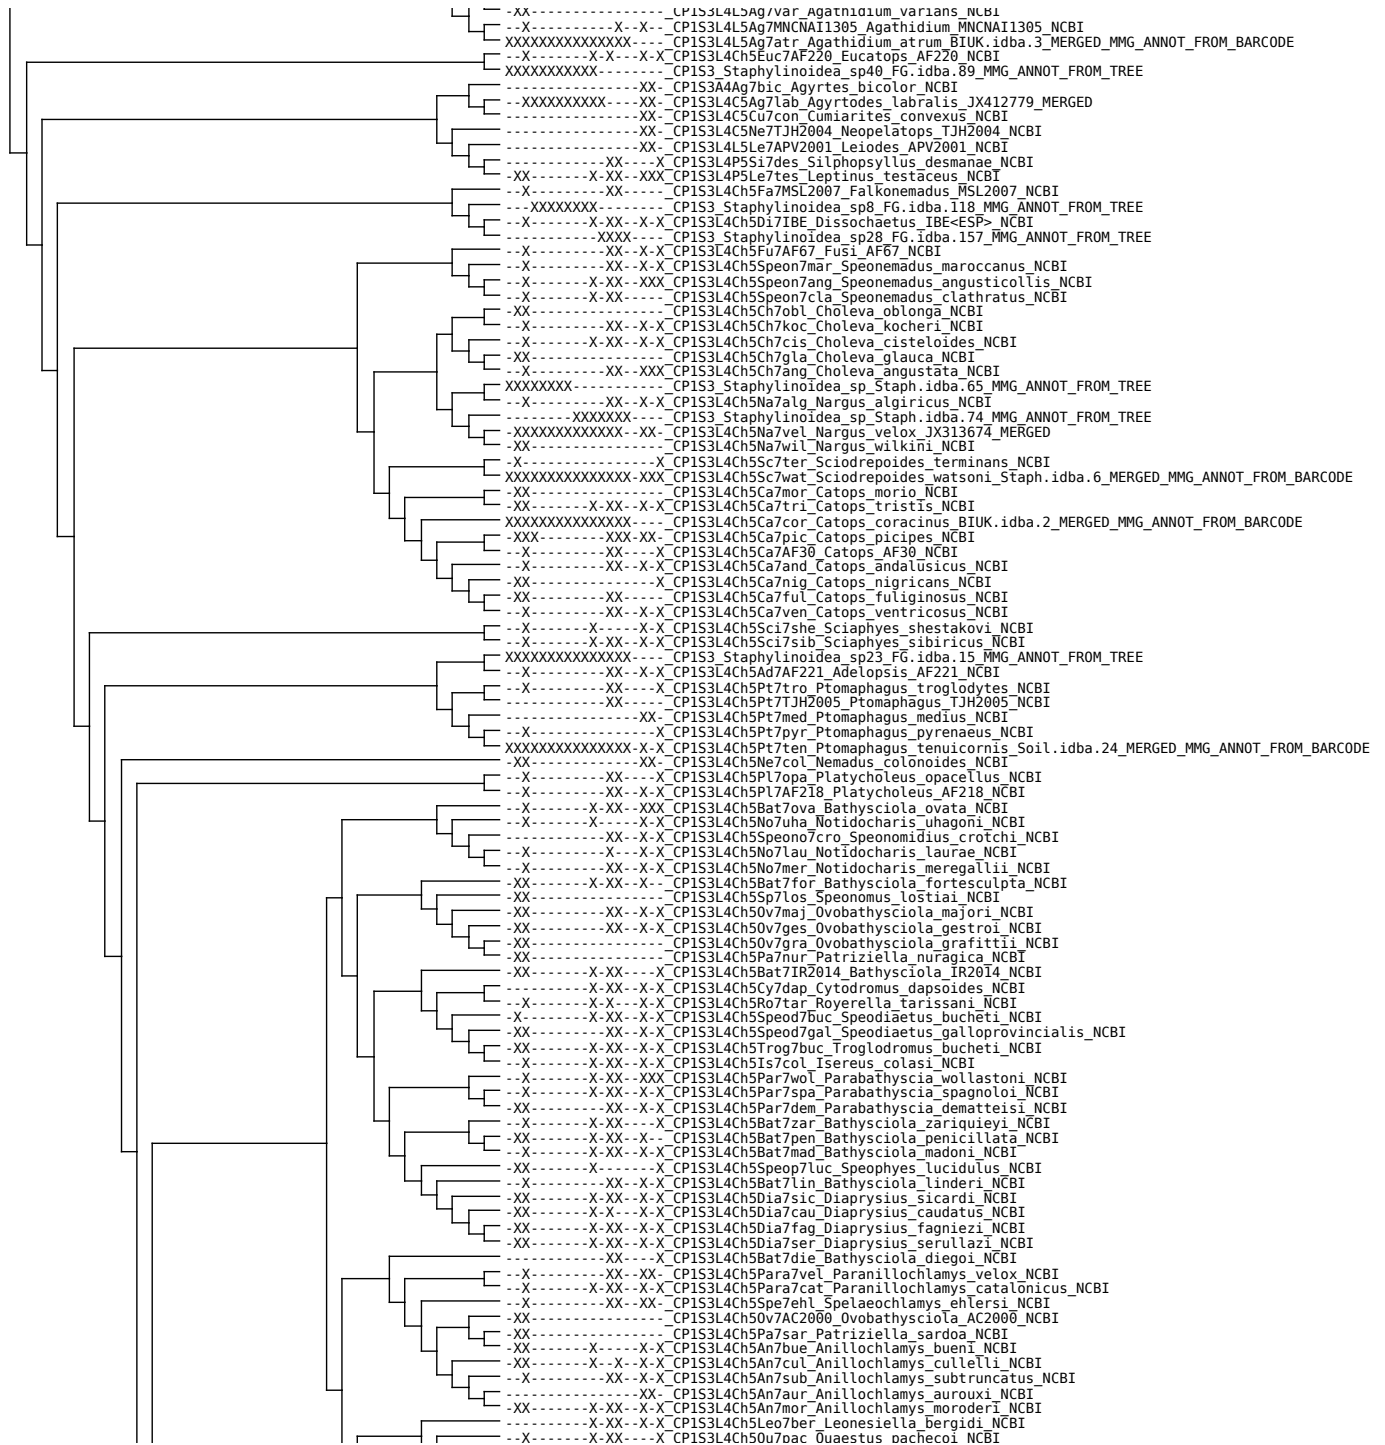

-X-----X-XX-X-X\_CP153L4Ch5Qu7jea\_Quaestus\_jeannei\_NCBI  
-X-----X-XX-X-X\_CP153L4Ch5Qu7ami\_Quaestus\_amicalis\_NCBI  
-X-----X-XX-X-X\_CP153L4Ch5Qu7arc\_Quaestus\_arcanus\_NCBI  
-X-----X-XX-X-X\_CP153L4Ch5Or7jas\_Oresigenus\_jaspei\_NCBI  
-X-----XX-X-X\_CP153L4Ch5Qu7adn\_Quaestus\_adnexus\_NCBI  
-X-----X-XX-X-X\_CP153L4Ch5Qu7aut\_Quaestus\_autumnalis\_NCBI  
-X-----XX-X-X\_CP153L4Ch5Bre7tri\_Breullia\_triangulum\_NCBI  
-X-----XX-X-X\_CP153L4Ch5Br7elo\_Breullites\_eloysi\_NCBI  
-X-----XX-X-X\_CP153L4Ch5Es7luq\_Espanoliella\_luquei\_NCBI  
-X-----X-XX-X-X\_CP153L4Ch5Qu7sha\_Quaestus\_sharpi\_NCBI  
-X-----XX-X-X\_CP153L4Ch5Qu7esc\_Quaestus\_escalerai\_NCBI  
-X-----X-XX-X-X\_CP153L4Ch5Es7cun\_Espanoliella\_cuneus\_NCBI  
XXXXXX---XX-XXX\_CP153L4Ch5Es7jea\_Espanoliella\_jeannei\_Staph.idba.86\_MERGED\_MMG\_ANNOT\_FROM\_BARCODE  
-X-----X-XX-X-X\_CP153L4Ch5Es7urd\_Espanoliella\_urdialensis\_NCBI  
-X-----X-XX-XXX\_CP153L4Ch5Qu7nol\_Quaestus\_noltei\_NCBI  
-X-----X-XX-X-X\_CP153L4Ch5Qu7can\_Quaestus\_cantabrigicus\_NCBI  
-X-----X-XX-X-X\_CP153L4Ch5Qu7cis\_Quaestus\_cisnerosii\_NCBI  
-X-----XX---X\_CP153L4Ch5Qu7pas\_Quaestus\_pasensis\_NCBI  
-X-----X-X-X-X\_CP153L4Ch5Fr7luc\_Fresnedaella\_lucius\_NCBI  
-X-----X-XX-X-X\_CP153L4Ch5Can7cut\_Cantabrogeus\_cultellus\_NCBI  
-X-----X-XX-X-X\_CP153L4Ch5Can7ant\_Cantabrogeus\_antimachus\_NCBI  
-X-----X-XX-X-X\_CP153L4Ch5Can7lug\_Cantabrogeus\_luquei\_NCBI  
-X-----X-XX-X-X\_CP153L4Ch5Can7nad\_Cantabrogeus\_nadali\_NCBI  
-XX-----X-XX-X-X\_CP153L4Ch5Can7fre\_Cantabrogeus\_fresnedai\_NCBI  
-X-----XX-X-X\_CP153L4Ch5Bathy7bys\_Bathysciomorphus\_byssinus\_NCBI  
-X-----X-XX-X-X\_CP153L4Ch5Parap7ser\_Parapropus\_sericeus\_NCBI  
-XX-----X-XX-X-X\_CP153L4Ch5Bath7khe\_Bathysciotes\_khevenhuelleri\_NCBI  
-X-----X-XX-X-X\_CP153L4Ch5As7ang\_Astagobius\_angustatus\_NCBI  
-X-----X---X-X\_CP153L4Ch5Le7hoc\_Leptodirus\_hochenwarti\_NCBI  
-X-----X---X-X\_CP153L4Ch5Tro7mes\_Trocharanis\_mestrei\_NCBI  
-X-----XX---X-X\_CP153L4Ch5Ph7pro\_Pholeuon\_proserpinae\_NCBI  
-X-----XX---X-X\_CP153L4Ch5Ph7gra\_Pholeuon\_gracile\_NCBI  
-X-----X-XX-X-X\_CP153L4Ch5Bat7IR2014\_1\_Bathysciola\_IR2014\_NCBI  
-X-----X-XX-X-X\_CP153L4Ch5Bat7lar\_Bathysciola\_larcennei\_NCBI  
-X-----X-XX-X-X\_CP153L4Ch5Bat7con\_Bathysciola\_convena\_NCBI  
-XX-----X-XX-X-X\_CP153L4Ch5Bat7liq\_Bathysciola\_liqueana\_NCBI  
-X-----X---X-X\_CP153L4Ch5Bat7mer\_Bathysciola\_meridionalis\_NCBI  
-X-----X-XX-X-CP153L4Ch5Bat7asp\_Bathysciola\_asperula\_NCBI  
-XX-----X-XX-X-X\_CP153L4Ch5Bat7fin\_Bathysciola\_finisimillennii\_NCBI  
-X-----X-XX-X-X\_CP153L4Ch5Naf7sor\_Nafarroa\_sorogainensis\_NCBI  
-X-----X---XXX\_CP153L4Ch5Ar7lei\_Aranzadiella\_leizaolai\_NCBI  
-X-----XX-X-X\_CP153L4Ch5Speo7gal\_Speocharidius\_galani\_NCBI  
-X-----X---XXX\_CP153L4Ch5Speo7bre\_Speocharidius\_breuilii\_NCBI  
-X-----X---XXX\_CP153L4Ch5Eu7ber\_Euryspeonomus\_beruetei\_NCBI  
-X-----XX-XXX\_CP153L4Ch5Jo7men\_Josettekia\_mendizabali\_NCBI  
-X-----X---X-X\_CP153L4Ch5Eu7cia\_Euryspeonomus\_ciaurrizi\_NCBI  
-X-----X-XX-X-X\_CP153L4Ch5Eu7bre\_Euryspeonomus\_breuilii\_NCBI  
-X-----X-XX-X-X\_CP153L4Ch5Bat7sch\_Bathysciola\_schodtei\_NCBI  
-X-----XX-X-X\_CP153L4Ch5Bat7mys\_Bathysciola\_mystica\_NCBI  
-X-----XX-X-X\_CP153L4Ch5Bat7par\_Bathysciola\_parallela\_NCBI  
-X-----XX-X-X\_CP153L4Ch5Bat7gra\_Bathysciola\_grandis\_NCBI  
-X-----X-XX-X-X\_CP153L4Ch5Bat7obe\_Bathysciola\_obermaieri\_NCBI  
-X-----XX-X-X\_CP153L4Ch5Bat7bre\_Bathysciola\_breuilii\_NCBI  
-XX-----CP153L4Ch5Sp7bru\_Speonomus\_bruckii\_NCBI  
-X-----XXX\_CP153L4Ch5Sp7gau\_Speonomus\_gaudini\_NCBI  
-X-----X-XX---X\_CP153L4Ch5Sp7spe\_Speonomus\_speluncarum\_NCBI  
-X-----X-XX-X-X\_CP153L4Ch5Sp7IR2014\_Speonomus\_IR2014\_NCBI  
-X-----X-XX-X-X\_CP153L4Ch5Sp7alb\_Speonomus\_alberti\_NCBI  
-X-----X-XX-X-X\_CP153L4Ch5Sp7bas\_Speonomus\_bastideus\_NCBI  
-X-----X-XX---X\_CP153L4Ch5Sp7bou\_Speonomus\_bourgoini\_NCBI  
-X-----XX-X-X\_CP153L4Ch5Sp7org\_Speonomus\_organbetensis\_NCBI  
-X-----X-XX-X-X\_CP153L4Ch5Bar7del\_Baronniesia\_delioti\_NCBI  
-X-----X---XX\_CP153L4Ch5Be7esp\_Bellesia\_espanyoli\_NCBI  
-X-----XX-X-X\_CP153L4Ch5Sp7inf\_Speonomus\_infernus\_NCBI  
-X-----X-XX-X-X\_CP153L4Ch5Pha7sio\_Phacomorphus\_sioberii\_NCBI  
XXXXXXXXXXXXXXXX\_CP153L4Ch5Pha7fra\_Phacomorphus\_fratyi\_Staph.idba.18\_MERGED\_MMG\_ANNOT\_FROM\_BARCODE  
-X-----X-XX-X-X\_CP153L4Ch5Pha7ale\_Phacomorphus\_alexinae\_NCBI  
-X-----X-XX-X-CP153L4Ch5Bat7jea\_Bathysciella\_jeannei\_NCBI  
-X-----X-XX-XXX\_CP153L4Ch5Parv7del\_Parvospeonomus\_delarouzei\_NCBI  
-XX-----X-XX-X-X\_CP153L4Ch5Parv7can\_Parvospeonomus\_canyellesi\_NCBI  
-X-----XX---X-X\_CP153L4Ch5Ps7rah\_Pseudospeonomus\_rahelai\_NCBI  
-X-----X---X-X\_CP153L4Ch5Trogl7gav\_Troglophyes\_gavoyi\_NCBI  
-X-----X---X-X\_CP153L4Ch5Trogl7lud\_Troglophyes\_ludovici\_NCBI  
-X-----XX-XX-CP153L4Ch5Pe7bof\_Perriniella\_bofilli\_NCBI  
-X-----XX-XXX\_CP153L4Ch5Ce7rib\_Ceretophyes\_riberai\_NCBI  
-XX-----X-XX-X-X\_CP153L4Ch5Ce7cen\_Ceretophyes\_cenarroii\_NCBI  
-X-----XX-XXX\_CP153L4Ch5Ant7que\_Antrocharis\_querilhaci\_NCBI  
-X-----XX-X-X\_CP153L4Ch5Ge7del\_Gesciella\_delioti\_NCBI  
-X-----X---X-X\_CP153L4Ch5Parat7car\_Paratroglophyes\_carrerei\_NCBI  
-XX-----XXX-X-X\_CP153L4Ch5Sp7car\_Speonomus\_carrerei\_NCBI  
-X-----X-XX---X\_CP153L4Ch5Paras7van\_Paraspeonomus\_vandeli\_NCBI  
-X-----X-XX-X-X\_CP153L4Ch5Sp7zop\_Speonomus\_zophosinus\_NCBI  
-X-----X-XX-X-X\_CP153L4Ch5Sp7nor\_Speonomus\_normandi\_NCBI  
-X-----XXX-X-X\_CP153L4Ch5Sp7hyd\_Speonomus\_hydrophilus\_NCBI  
-X-----XX---X-X\_CP153L4Ch5Sp7sty\_Speonomus\_stygius\_NCBI  
-X-----X-XXX-X-X\_CP153L4Ch5Sp7lon\_Speonomus\_longicornis\_NCBI  
-X-----X---X-X\_CP153L4Ch5Sp7cur\_Speonomus\_curvipes\_NCBI  
-X-----X-XX-X-X\_CP153L4Ch5Sp7fag\_Speonomus\_fagniezi\_NCBI  
-X-----X-XX-X-X\_CP153L4Ch5Sp7pyr\_Speonomus\_pyreneus\_NCBI  
-X-----XX-X-X\_CP153L4Ch5Sp7die\_Speonomus\_diecki\_NCBI  
-XX-----CP153L4Ch5Sp7hyg\_Speonomus\_hygrophilus\_NCBI  
XXXXXXXXXXXXXXXX-X-X\_CP153L4Ch5Tr7oro\_Trapezodirus\_orobios\_Staph.idba.25\_MERGED\_MMG\_ANNOT\_FROM\_BARCODE  
-X-----X-XX-X-X\_CP153L4Ch5Tr7cer\_Trapezodirus\_cerberus\_NCBI  
-X-----XXX\_CP153L4Ch5Tr7car\_Trapezodirus\_carrodilae\_NCBI  
-X-----XX-CP153L4Ch5Speonom7nit\_Speonomites\_nitens\_NCBI

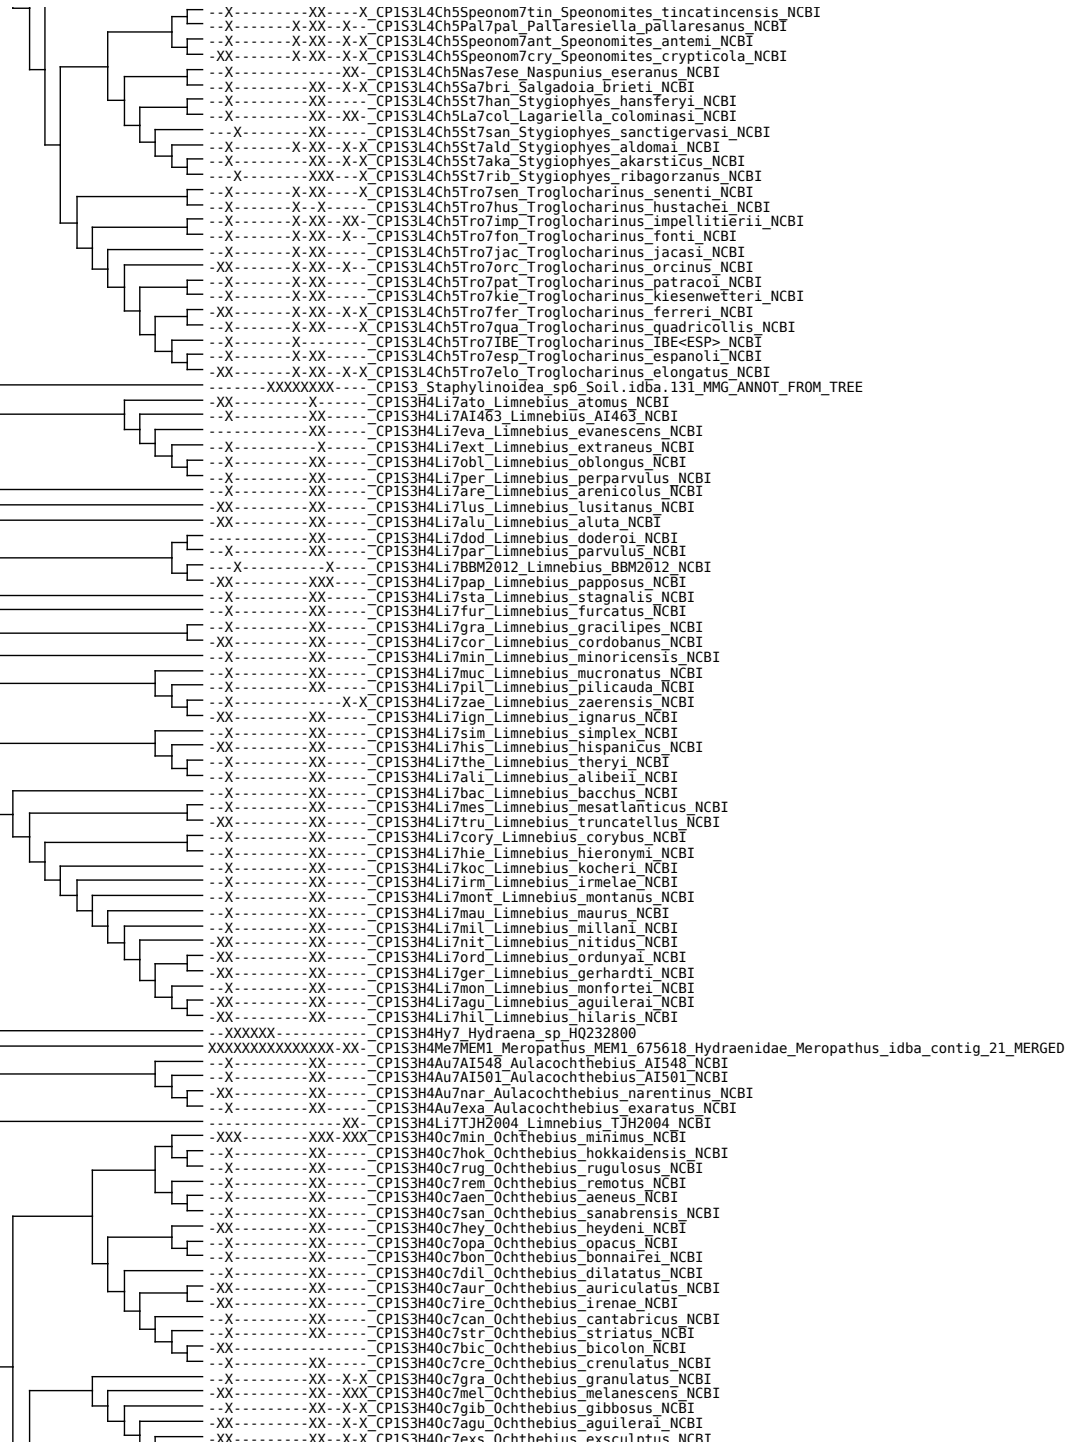

XX -X-X CP153H40c7col Ochthebius colveranus NCBI  
XX -X-X CP153H40c7leg Ochthebius legionensis NCBI  
X -X-X CP153H40c7hal Ochthebius halbherrii NCBI  
X -X-X CP153H4Mi7AF116 Micragasma AF116 NCBI  
X -X-X CP153H40c7serr Ochthebius serratus NCBI  
X -X-X CP153H40c7lej Ochthebius lejolissii NCBI  
X -X-X CP153H40c7subi Ochthebius subinteger NCBI  
X -X-X CP153H40c7quad Ochthebius quadricollis NCBI  
X -X-X CP153H40c7bre Ochthebius brevicollis NCBI  
X -X-X CP153H40c7fov Ochthebius foveolatus NCBI  
X -X-X CP153H40c7virg Ochthebius virgula NCBI  
X -X-X CP153H40c7med Ochthebius mediterraneus NCBI  
X -X-X CP153H40c7sat Ochthebius satol NCBI  
X -X-X CP153H40c7sid Ochthebius sidanus NCBI  
X -X-X CP153H40c7pow Ochthebius poweri NCBI  
X -X-X CP153H40c7met Ochthebius metallescens NCBI  
X -X-X CP153H40c7ser Ochthebius serpentinus NCBI  
X -X-X CP153H40c7gri Ochthebius griotes NCBI  
X -X-X CP153H40c7sem Ochthebius semisericeus NCBI  
X -X-X CP153H40c7cor Ochthebius corrugatus NCBI  
X -X-X CP153H40c7dep Ochthebius depressionis NCBI  
X -X-X CP153H40c7anx Ochthebius anxifer NCBI  
X -X-X CP153H40c7not Ochthebius notabilis NCBI  
XX -X-X CP153H40c7gla Ochthebius glaber NCBI  
X -X-X CP153H40c7sal Ochthebius salinator NCBI  
X -X-X CP153H40c7tiv Ochthebius tivelunus NCBI  
X -X-X CP153H40c7lob Ochthebius lobicolis NCBI  
X -X-X CP153H40c7cae Ochthebius caesarAugustae NCBI  
X -X-X CP153H40c7rag Ochthebius ragusae NCBI  
X -X-X CP153H40c7quadr Ochthebius quadrifoveolatus NCBI  
X -X-X CP153H40c7joo Ochthebius joosti NCBI  
X -X-X CP153H40c7gran Ochthebius grandipennis NCBI  
XX -X-X CP153H40c7tud Ochthebius tudmirensis NCBI  
X -X-X CP153H40c7cup Ochthebius cuprescens NCBI  
X -X-X CP153H40c7nan Ochthebius nanus NCBI  
X -X-X CP153H40c7mon Ochthebius montesi NCBI  
X -X-X CP153H40c7RA126 Ochthebius RA126 NCBI  
X -X-X CP153H40c7nil Ochthebius nilsoni NCBI  
X -X-X CP153H40c7dif Ochthebius difficilis NCBI  
X -X-X CP153H40c7mer Ochthebius meridionalis NCBI  
XX -X-X CP153H40c7sub Ochthebius subpictus NCBI  
XX -X-X CP153H40c7mar Ochthebius marinus NCBI  
X -X-X CP153H40c7gru Ochthebius gruwelli NCBI  
X -X-X CP153H40c7viri Ochthebius viridescens NCBI  
X -X-X CP153H40c7vir Ochthebius viridis NCBI  
X -X-X CP153H40c7pus Ochthebius pusillus NCBI  
XX -X-X CP153H4Ad7orc Adelphydraena orchymonti NCBI  
X -X-X CP153H4Hy7pae Hydraena paeminosa NCBI  
X -X-X CP153H4Hy7bre Hydraena brevis NCBI  
XX -X-X CP153H4Hy7put Hydraena putearius NCBI  
XX -X-X CP153H4Hy7atr Hydraena atrata NCBI  
XX -X-X CP153H4Hy7isa Hydraena isabelae NCBI  
X -X-X CP153H4Hy7ser Hydraena serricolis NCBI  
XX -X-X CP153H4Hy7pall Hydraena pallidula NCBI  
XX -X-X CP153H4Hy7her Hydraena hernandoi NCBI  
X -X-X CP153H4Hy7tes Hydraena testacea NCBI  
XX -X-X CP153H4Hy7rug Hydraena rugosa NCBI  
XX -X-X CP153H4Hy7mari Hydraena marinae NCBI  
XX -X-X CP153H4Hy7exar Hydraena exarata NCBI  
X -X-X CP153H4Hy7RA329 Hydraena RA329 NCBI  
X -X-X CP153H4Hy7van Hydraena vandykei NCBI  
X -X-X CP153H4Hy7AI610 Hydraena AI610 NCBI  
X -X-X CP153H4Hy7pet Hydraena petita NCBI  
XX -X-X CP153H4Hy7pac Hydraena pacifica NCBI  
X -X-X CP153H4Hy7RA302 Hydraena RA302 NCBI  
XX -X-X CP153H4Hy7are Hydraena arenicola NCBI  
X -X-X CP153H4Hy7cir Hydraena circulata NCBI  
X -X-X CP153H4Hy7AIS41 Hydraena AIS41 NCBI  
X -X-X CP153H4Hy7AIS42 Hydraena AIS42 NCBI  
X -X-X CP153H4Hy7duo Hydraena duodecimata NCBI  
XX -X-X CP153H4Hy7moni Hydraena monikae NCBI  
X -X-X CP153H4Hy7cordi Hydraena cordiformis NCBI  
X -X-X CP153H4Hy7AF202 Hydraena AF202 NCBI  
X -X-X CP153H4Hy7hos Hydraena hosiwerigi NCBI  
X -X-X CP153H4Hy7AF194 Hydraena AF194 NCBI  
X -X-X CP153H4Hy7AH139 Hydraena AH139 NCBI  
X -X-X CP153H4Hy7AI709 Hydraena AI709 NCBI  
XX -X-X CP153H4Hy7mang Hydraena mangoao NCBI  
XX -X-X CP153H4Hy7miy Hydraena miyatakei NCBI  
X -X-X CP153H4Hy7joj Hydraena jojoorculloi NCBI  
XX -X-X CP153H4Hy7cast Hydraena castanescens NCBI  
X -X-X CP153H4Hy7cla Hydraena claudia NCBI  
X -X-X CP153H4Hy7RA319 Hydraena RA319 NCBI  
XX -X-X CP153H4Hy7coo Hydraena cooperi NCBI  
X -X-X CP153H4Hy7aby Hydraena abyssinica NCBI  
X -X-X CP153H4Hy7acc Hydraena accurata NCBI  
XX -X-X CP153H4Hy7RA98 Hydraena RA98 NCBI  
X -X-X CP153H4Hy7qua Hydraena quadricollis NCBI  
X -X-X CP153H4Hy7AIS47 Hydraena AIS47 NCBI  
XX -X-X CP153H4Hy7RA321 Hydraena RA321 NCBI  
X -X-X CP153H4Hy7fon Hydraena fontana NCBI  
X -X-X CP153H4Hy7sca Hydraena scabra NCBI  
XX -X-X CP153H4Hy7RA322 Hydraena RA322 NCBI  
X -X-X CP153H4Hy7scin Hydraena scintillabella NCBI  
X -X-X CP153H4Hy7AI687 Hydraena AI687 NCBI

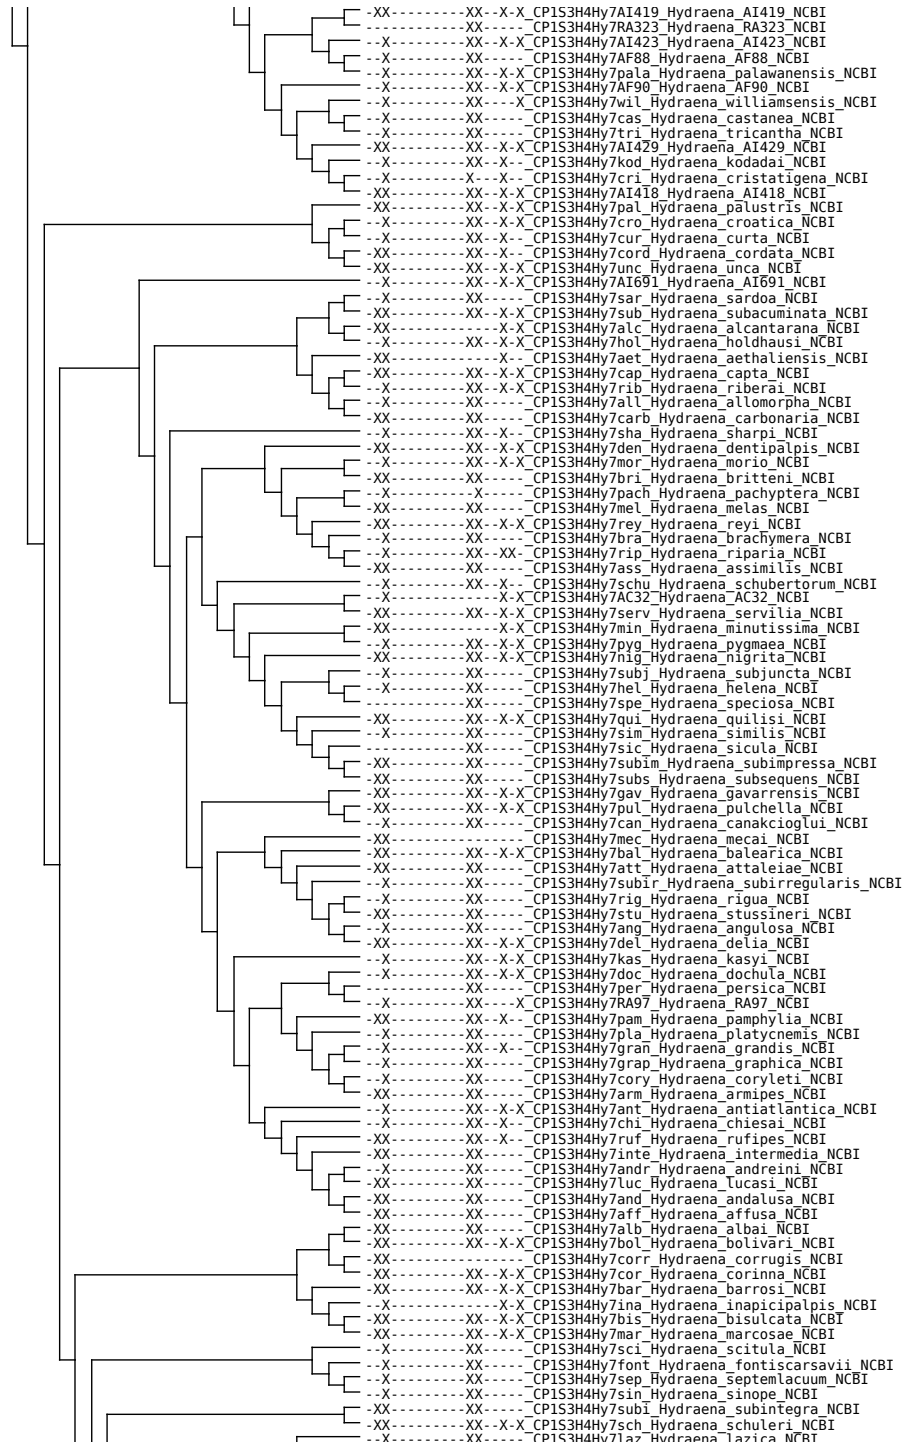



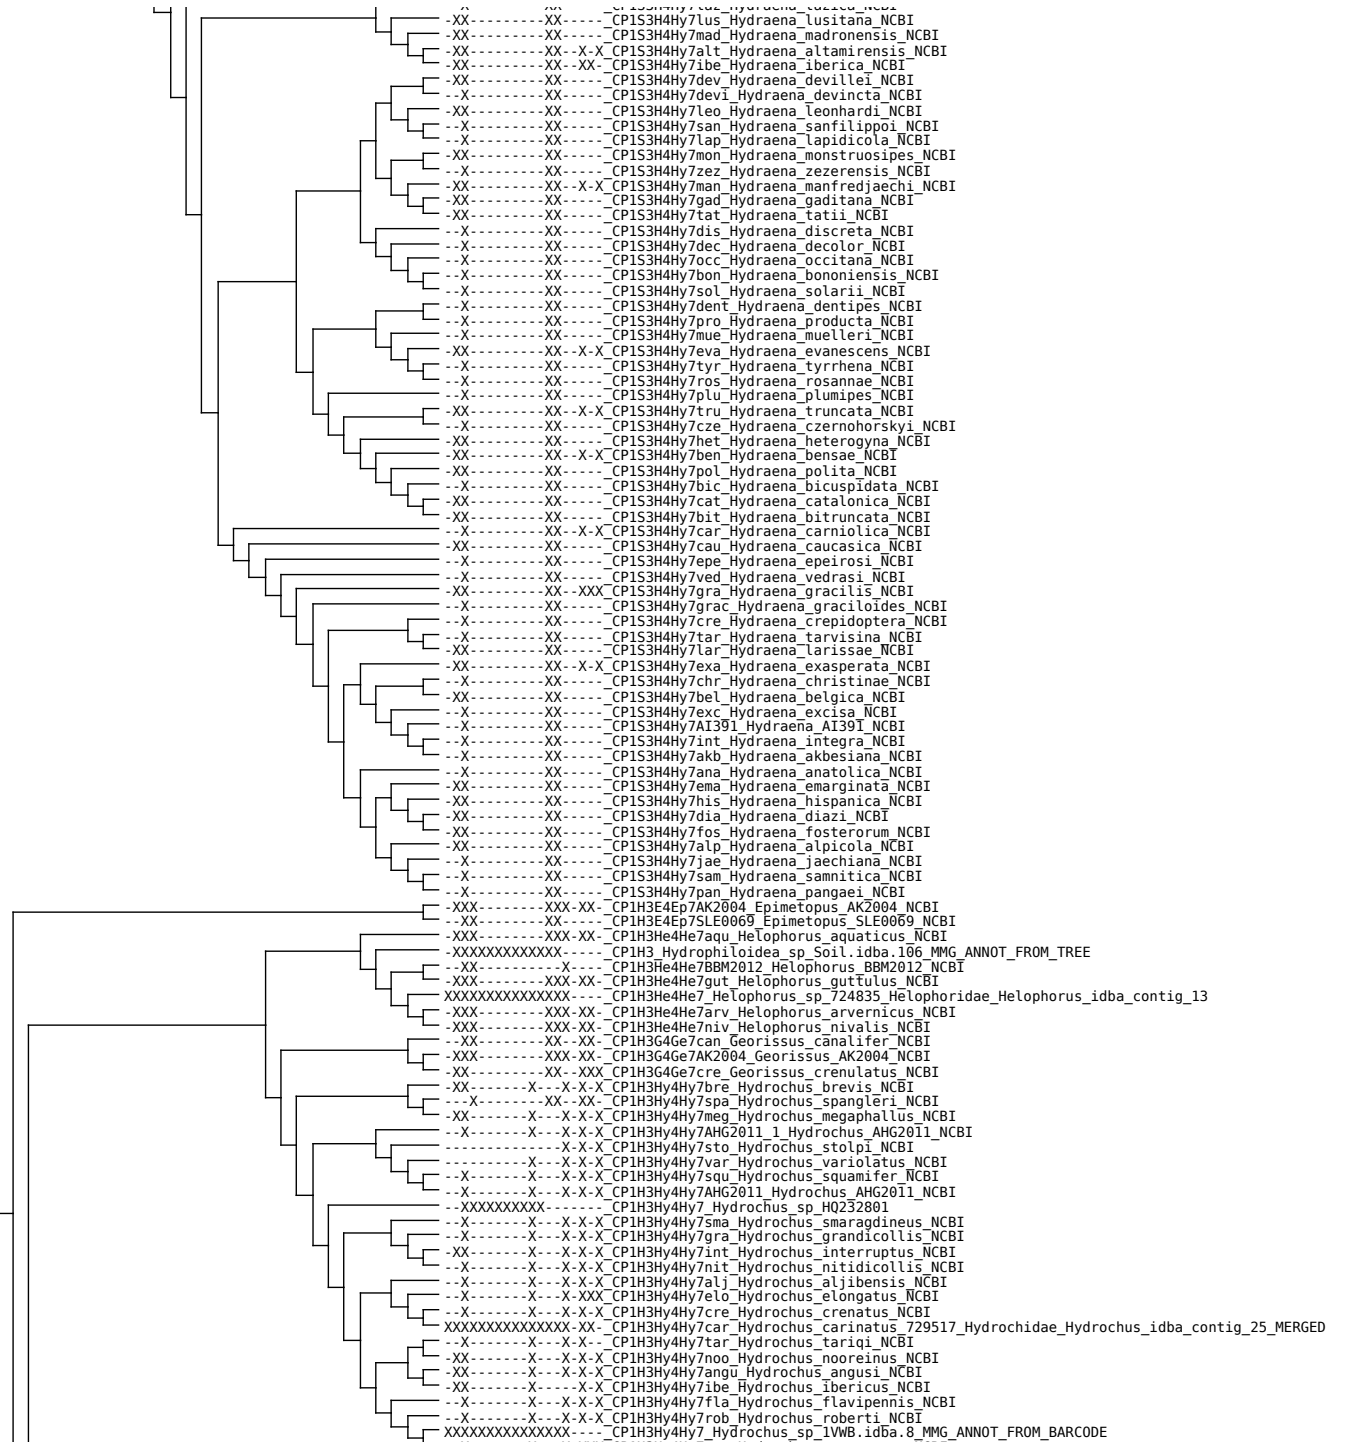

--X-----X---X-XXX CP1H3Hy4Hy7ang\_Hydrochus\_angustatus NCBI  
-XX-----XXX-XXX CP1H3S4Sp7ema\_Spercheus\_emarginatus NCBI  
-X-----XX-CP1H3H4H5An7par\_Anacaena\_parvula NCBI  
XXXXXXXXXXXXXXXXX CP1H3H4H5Amp7glo\_Amphipos\_globus\_JX412726  
-XX-----XX-XX-CP1H3H4H5Amp7SLE0408\_Amphipos\_SLE0408 NCBI  
-XX-----XX-CP1H3H4H5Amp7mat\_Amphipos\_mater NCBI  
-XX-----XX-CPMG2011\_Coleoptera\_MG2011\_NCBI  
-XX-----XX-XX-CP1H3H4H5Amp7SLE0407\_Amphipos\_SLE0407 NCBI  
-XX-----XX-CP1H3H4H5007mad\_Oocyclus\_madidus NCBI  
-XX-----XX-CP1H3H4H5007SLE0086\_Oocyclus\_SLE0086 NCBI  
-XX-----XX-CP1H3H4H5007SLE0085\_Oocyclus\_SLE0085 NCBI  
-XX-----XX-XX-CP1H3H4H5La7ref\_Laccobius\_reflexipenis NCBI  
-XXX-----X-CP1H3H4H5La7bip\_Laccobius\_bipunctatus NCBI  
-XX-----XX-CP1H3H4H5La7sin\_Laccobius\_sinuatus NCBI  
-XX-----XX-XX-CP1H3H4H5La7ser\_Laccobius\_serratus NCBI  
-XXX-----X-CP1H3H4H5La7str\_Laccobius\_striatulus NCBI  
-XX-----XX-CP1H3H4H5La7min\_Laccobius\_minutus NCBI  
-XX-----X-CP1H3H4H5La7yte\_Laccobius\_ytenensis NCBI  
-X-----X-CP1H3H4H5La7MTM2009\_1\_Laccobius\_MTM2009 NCBI  
-X-----X-CP1H3H4MTM2009\_2\_Hydrophilidae\_MTM2009 NCBI  
-X-----X-CP1H3H4H5La7MTM2009\_Laccobius\_MTM2009 NCBI  
-X-----X-CP1H3H4H5Hydro7SLE0067\_Hydrophilomima\_SLE0067 NCBI  
-XX-----XX-CP1H3H4H5Pe7SLE0032\_Pelthydrus\_SLE0032 NCBI  
-XX-----XX-XX-CP1H3H4H5A7ga\_Arabhydrus\_gallagheri NCBI  
-XX-----XX-CP1H3H4H5A7TBERA106\_Arabhydrus\_1BERA106 NCBI  
-X-----XX-XX-CP1H3H4H5Op7FUS\_Ophthalmocyclus\_FUSE NCBI  
-XX-----X-CP1H3H4H5007pic\_Oocyclus\_pico NCBI  
-XX-----X-CP1H3H4H5007tru\_Oocyclus\_trujillo NCBI  
-XX-----XX-XX-CP1H3H4H5007pet\_Oocyclus\_petra NCBI  
-XX-----X-CP1H3H4H5007sap\_Oocyclus\_sapphirus NCBI  
-XX-----XX-XX-CP1H3H4H5007fun\_Oocyclus\_funestus NCBI  
-XX-----XX-CP1H3H4H5007orn\_Oocyclus\_ornatus NCBI  
-XX-----XX-XX-CP1H3H4H5Pa7lim\_Paracymus\_limbatulus NCBI  
-X-----X-CP1H3H4H5Pa7sub\_Paracymus\_subcupreus NCBI  
-XX-----XX-XX-CP1H3H4H5Pa7pyg\_Paracymus\_pygmaeus NCBI  
-XX-----XX-CP1H3H4H5Hyd7alb\_Hydrophilus\_albipes NCBI  
-XX-----XX-XX-CP1H3H4H5Sc7SLE0090\_Scoliopsis\_SLE0090 NCBI  
-XX-----XX-XX-CP1H3H4H5Sc7SLE0091\_Scoliopsis\_SLE0091 NCBI  
-X-----XX-XX-CP1H3H4H5A7yal\_Allocotocerus\_valumbaboothbyi NCBI  
-XX-----XX-XX-CP1H3H4H5De7SLE0041\_Derallus\_SLE0041 NCBI  
-XX-----XX-XX-CP1H3H4H5Re7att\_Regimbartia\_attenuata NCBI  
-X-----X-CP1H3H4H5A7MTM2009\_2\_Allocotocerus\_MTM2009 NCBI  
-X-----X-CP1H3H4H5A7MTM2009\_1\_Allocotocerus\_MTM2009 NCBI  
-X-----X-CP1H3H4H5A7MTM2009\_Allocotocerus\_MTM2009 NCBI  
-X-----X-CP1H3H4MTM2009\_25\_Hydrophilidae\_MTM2009 NCBI  
-X-----X-CP1H3H4MTM2009\_1\_Hydrophilidae\_MTM2009 NCBI  
-X-----XX-CP1H3H4H5Hem7sel\_Hemiosus\_selva NCBI  
-X-----X-CP1H3H4H5Re7MTM2009\_Regimbartia\_MTM2009 NCBI  
-X-----X-CP1H3H4H5Be7MTM2009\_Berosus\_MTM2009 NCBI  
XXXXXXXXXXXXXXXXX CP1H3H4H5Be7aff\_Berosus\_affinis\_1vwb.idba.9\_MERGED\_MMG\_ANNOT\_FROM\_BARCODE  
-X-----XX-CP1H3H4H5Be7orn\_Berosus\_ornaticollis NCBI  
-XX-----XX-CP1H3H4H5Be7BMNH668156\_Berosus\_BMNH668156 NCBI  
-XX-----XXX-CP1H3H4H5Be7sig\_Berosus\_signaticollis NCBI  
-XXX-----XXX-XX-CP1H3H4H5Be7lur\_Berosus\_luridus NCBI  
-XX-----X-XX-CP1H3H4H5Be7asy\_Berosus\_asymmetricus NCBI  
-XX-----XX-XX-CP1H3H4H5Be7gar\_Berosus\_garciai NCBI  
-X-----X-CP1H3H4H5St7MTM2009\_Sternolophus\_MTM2009 NCBI  
-X-----X-CP1H3H4MTM2009\_20\_Hydrophilidae\_MTM2009 NCBI  
-X-----X-CP1H3H4H5To7SLE0295\_Tormus\_SLE0295 NCBI  
-X-----XX-CP1H3H4H5Hy7con\_Hydrobius\_convexus NCBI  
-XXX-----XXX-XX-CP1H3H4H5Hy7fus\_Hydrobius\_fuscipes NCBI  
-X-----X-CP1H3H4H5Am7lat\_Ametor\_latus NCBI  
-XX-----XX-CP1H3H4H5Am7sca\_Ametor\_scarosus NCBI  
-X-----XX-CP1H3H4H5Hyb7ha\_Hybogralius\_hartmeyeri NCBI  
-XX-----XX-CP1H3H4H5Hy7me\_L\_Hydrobius\_melaenus NCBI  
-XX-----X-XX-CP1H3H4H5Li7sem\_Limnoxenus\_semicylindricus NCBI  
-XX-----XX-CP1H3H4H5Li7nig\_Limnoxenus\_niger NCBI  
-XX-----XX-CP1H3H4H5Li7zea\_Limnoxenus\_zealandicus NCBI  
-XX-----XX-CP1H3H4H5Hyd7SLE0075\_Hydrophilus\_SLE0075 NCBI  
-XX-----X-CP1H3H4H5Hyd7pic\_Hydrophilus\_piceus NCBI  
XXXXXXXXXXXXX CP1H3H4H5St7\_Sternolophus\_sp\_JX412800  
-XX-----XX-CP1H3H4H5Sp7tes\_Sperchopsis\_tessellata NCBI  
-XX-----X-CP1H3H4H5Hydro7BBM2012\_Hydrochara\_BBM2012 NCBI  
-XX-----XX-XX-CP1H3H4H5St7mar\_Sternolophus\_marginicollis NCBI  
-X-----X-CP1H3H4H5Hydro7obt\_Hydrochara\_obtusata NCBI  
-XX-----XX-XX-CP1H3H4H5Hydro7SLE0071\_Hydrobiomorpha\_SLE0071 NCBI  
-X-----X-CP1H3H4H5Pa7MTM2009\_Paracymus\_MTM2009 NCBI  
-X-----X-CP1H3H4MTM2009\_11\_Hydrophilidae\_MTM2009 NCBI  
-XX-----XX-XX-CP1H3H4H5Tr7col\_Tropisternus\_collaris NCBI  
-XX-----XX-CP1H3H4H5Tr7ell\_Tropisternus\_ellipticus NCBI  
-X-----XX-CP1H3H4H5Tr7aff\_Tropisternus\_affinis NCBI  
-XX-----XX-XX-CP1H3H4H5Tr7lat\_Tropisternus\_lateralis NCBI  
XXXXXXXXXXXXX CP1H3H4H5Tr7\_Tropisternus\_sp\_NC\_018349  
XXXXXXXXXXXXX CP1H3H4H5Tr7BYUC0166\_Tropisternus\_BYUC0166 NCBI  
-XX-----XX-XX-CP1H3H4H5Ho7wal\_Horelophus\_walker\_i NCBI  
-XX-----XX-XX-CP1H3H4H5Cr7MSC1819\_Crenitius\_MSC1819 NCBI  
-X-----XX-XX-CP1H3H4H5An7sut\_Anacaena\_suturalis NCBI  
-X-----XX-XX-CP1H3H4H5An7sol\_Anacaena\_solstitialis NCBI  
-XX-----X-XX-CP1H3H4H5An7hir\_Anacaena\_hirsuta NCBI  
-XX-----XX-XX-CP1H3H4H5An7SLE0346\_Anacaena\_SLE0346 NCBI  
-XX-----XX-XX-CP1H3H4H5Th7SLE0127\_Thysanarthria\_SLE0127 NCBI  
-XXX-----X-CP1H3H4H5Ch7sem\_Chaetarhria\_seminulum NCBI  
-XX-----XX-CP1H3H4H5Ch7TJH2004\_Chaetarhria\_TJH2004 NCBI  
-XX-----XX-XX-CP1H3H4H5Ch7SLE0410\_Chaetarhria\_SLE0410 NCBI  
-XX-----XX-XX-CP1H3H4H5Gu7SLE0411\_Guyanobius\_SLE0411 NCBI  
-XX-----XX-XX-CP1H3H4H5Gu7lac\_Guyanobius\_laciniiventris NCBI

CP1H3H4H5Ch7inc Chaetarthria incisa NCBI  
CP1H3H4H5He7ser Hemisphaera seriatoapunctata NCBI  
CP1H3H4H5Ch7MF247 Chaetarthria MF247 NCBI  
CP1H3H4S5Pse7ver Pseudorygmodus versicolor NCBI  
CP1H3H4H5An7line Anacaena lineata NCBI  
CP1H3H4H5An7luc Anacaena lucida NCBI  
CP1H3H4H5An7lin Anacaena lindi NCBI  
CP1H3H4H5An7lan Anacaena lanzhujii NCBI  
CP1H3H4H5An7MF198 Anacaena MF198 NCBI  
CP1H3H4H5An7glo Anacaena globulus NCBI  
CP1H3H4H5An7lim Anacaena limbata NCBI  
CP1H3H4MTM2009\_3 Hydrophilidae MTM2009 NCBI  
CP1H3H4H5He7MTM2009 Hemisphaera MTM2009 NCBI  
CP1H3H4A5He7SLE0031 Helobata SLE0031 NCBI  
CP1H3H4A5He7SLE0240 Helochares SLE0240 NCBI  
CP1H3H4A5Ag7MTM2009\_4 Agraphydrus MTM2009 NCBI  
CP1H3H4A5G7SLE0027 Globulosis SLE0027 NCBI  
CP1H3H4SLE0102 Hydrophilidae SLE0102 NCBI  
CP1H3H4SLE0101 Hydrophilidae SLE0101 NCBI  
CP1H3H4A5To7sul Tobochares sulcatus NCBI  
CP1H3H4SLE0130 Hydrophilidae SLE0130 NCBI  
CP1H3H4A5Ch7SLE0080 Chasmogenus SLE0080 NCBI  
CP1H3H4A5Ch7SLE0077 Chasmogenus SLE0077 NCBI  
CP1H3H4A5Ch7SLE0078 Chasmogenus SLE0078 NCBI  
CP1H3H4A5Ch7rui Chasmogenus ruidus NCBI  
CP1H3H4MTM2009\_23 Hydrophilidae MTM2009 NCBI  
CP1H3H4A5Ho7han Horelophopsis henseni NCBI  
CP1H3H4A5Ag7SLE0252 Agraphydrus SLE0252 NCBI  
CP1H3H4MTM2009\_21 Hydrophilidae MTM2009 NCBI  
CP1H3H4MTM2009\_22 Hydrophilidae MTM2009 NCBI  
CP1H3H4A5Ag7MTM2009\_2 Agraphydrus MTM2009 NCBI  
CP1H3H4A5Ag7MTM2009\_1 Agraphydrus MTM2009 NCBI  
CP1H3H4A5Ag7MTM2009\_1 Agraphydrus MTM2009 NCBI  
CP1H3H4H5An7lut Anacaena lutescens NCBI  
CP1H3He4He7min Helophorus minutus NCBI  
CP1H3He4He7bre Helophorus brevipalpis NCBI  
CP1H3H4A5He7SLE0034 Helochares SLE0034 NCBI  
CP1H3H4A5He7MTM2009\_3 Helochares MTM2009 NCBI  
CP1H3H4A5He7MTM2009\_2 Helochares MTM2009 NCBI  
CP1H3H4A5He7MTM2009\_1 Helochares MTM2009 NCBI  
CP1H3H4MTM2009\_24 Hydrophilidae MTM2009 NCBI  
CP1H3H4A5He7ob5 Helochares obscurus NCBI  
XXXXXXXXXXXX CP1H3H4A5He7 Helochares\_sp\_1VWB.idba.18\_MMG\_ANNOT\_FROM\_BARCODE  
XXXXX-X-XXX CP1H3H4A5He7liv Helochares lividus NCBI  
CP1H3H4A5He7MTM2009\_4 Helochares MTM2009 NCBI  
CP1H3H4A5He7MTM2009\_6 Helochares MTM2009 NCBI  
CP1H3H4MTM2009\_5 Hydrophilidae MTM2009 NCBI  
CP1H3H4A5He7MTM2009\_5 Helochares MTM2009 NCBI  
CP1H3H4MTM2009\_18 Hydrophilidae MTM2009 NCBI  
CP1H3H4MTM2009\_17 Hydrophilidae MTM2009 NCBI  
CP1H3H4MTM2009\_14 Hydrophilidae MTM2009 NCBI  
CP1H3H4MTM2009\_10 Hydrophilidae MTM2009 NCBI  
CP1H3H4H5An7MTM2009\_5 Anacaena MTM2009 NCBI  
CP1H3H4MTM2009\_6 Hydrophilidae MTM2009 NCBI  
CP1H3H4H5An7MTM2009 Anacaena MTM2009 NCBI  
CP1H3H4MTM2009\_7 Hydrophilidae MTM2009 NCBI  
CP1H3H4MTM2009\_15 Hydrophilidae MTM2009 NCBI  
CP1H3H4H5An7MTM2009\_4 Anacaena MTM2009 NCBI  
CP1H3H4H5An7MTM2009\_7 Anacaena MTM2009 NCBI  
CP1H3H4H5An7MTM2009\_8 Anacaena MTM2009 NCBI  
CP1H3H4H5An7MTM2009\_1 Anacaena MTM2009 NCBI  
CP1H3H4H5An7MTM2009\_3 Anacaena MTM2009 NCBI  
CP1H3H4MTM2009\_9 Hydrophilidae MTM2009 NCBI  
CP1H3H4MTM2009\_12 Hydrophilidae MTM2009 NCBI  
CP1H3H4MTM2009\_8 Hydrophilidae MTM2009 NCBI  
CP1H3H4H5An7MTM2009\_2 Anacaena MTM2009 NCBI  
CP1H3H4H5An7MTM2009\_6 Anacaena MTM2009 NCBI  
X-XXX CP1H3H4MTM2009\_13 Hydrophilidae MTM2009 NCBI  
XXXXXXXXXXXX-X-XXX CP1H3H4H5Cy7mar Cymbiodyta marginella amie.idba.89\_MERGED\_MMG\_ANNOT\_FROM\_BARCODE  
CP1H3H4H5N7lip Notionotus liparus NCBI  
CP1H3H4H5N7l7b Helotombus bifidus NCBI  
CP1H3H4H5N7SLE0092 Notionotus SLE0092 NCBI  
CP1H3H4H5En7IBEAB87 Enochrus IBEAB87 NCBI  
CP1H3H4H5En7mas Enochrus mastersii NCBI  
CP1H3H4H5Cy7sem Cymbiodyta semistriata NCBI  
CP1H3H4H5En7IBEAB85 Enochrus IBEAB85 NCBI  
CP1H3H4H5En7SLE0241 Enochrus SLE0241 NCBI  
CP1H3H4H5En7tal Enochrus talamanca NCBI  
CP1H3H4H5En7IBEAB326 Enochrus IBEAB326 NCBI  
CP1H3H4H5En7IBEAB89 Enochrus IBEAB89 NCBI  
CP1H3H4H5En7IBEAB88 Enochrus IBEAB88 NCBI  
CP1H3H4H5En7fim Enochrus fimbriatus NCBI  
CP1H3H4H5En7mor Enochrus morenae NCBI  
CP1H3H4H5En7cin Enochrus cinctus NCBI  
CP1H3H4H5En7IBEAB84 Enochrus IBEAB84 NCBI  
CP1H3H4H5En7pic Enochrus piceus NCBI  
CP1H3H4H5En7nat Enochrus natalensis NCBI  
CP1H3H4H5En7IBEAB310 Enochrus IBEAB310 NCBI  
CP1H3H4H5En7coa Enochrus coarctatus NCBI  
CP1H3H4H5En7och Enochrus ochraceus NCBI  
CP1H3H4H5En7aff Enochrus affinis NCBI  
CP1H3H4H5En7nig Enochrus nigrinus NCBI  
CP1H3H4H5En7MTM2009\_3 Enochrus MTM2009 NCBI  
CP1H3H4H5En7MTM2009\_2 Enochrus MTM2009 NCBI  
CP1H3H4H5En7MTM2009\_1 Enochrus MTM2009 NCBI

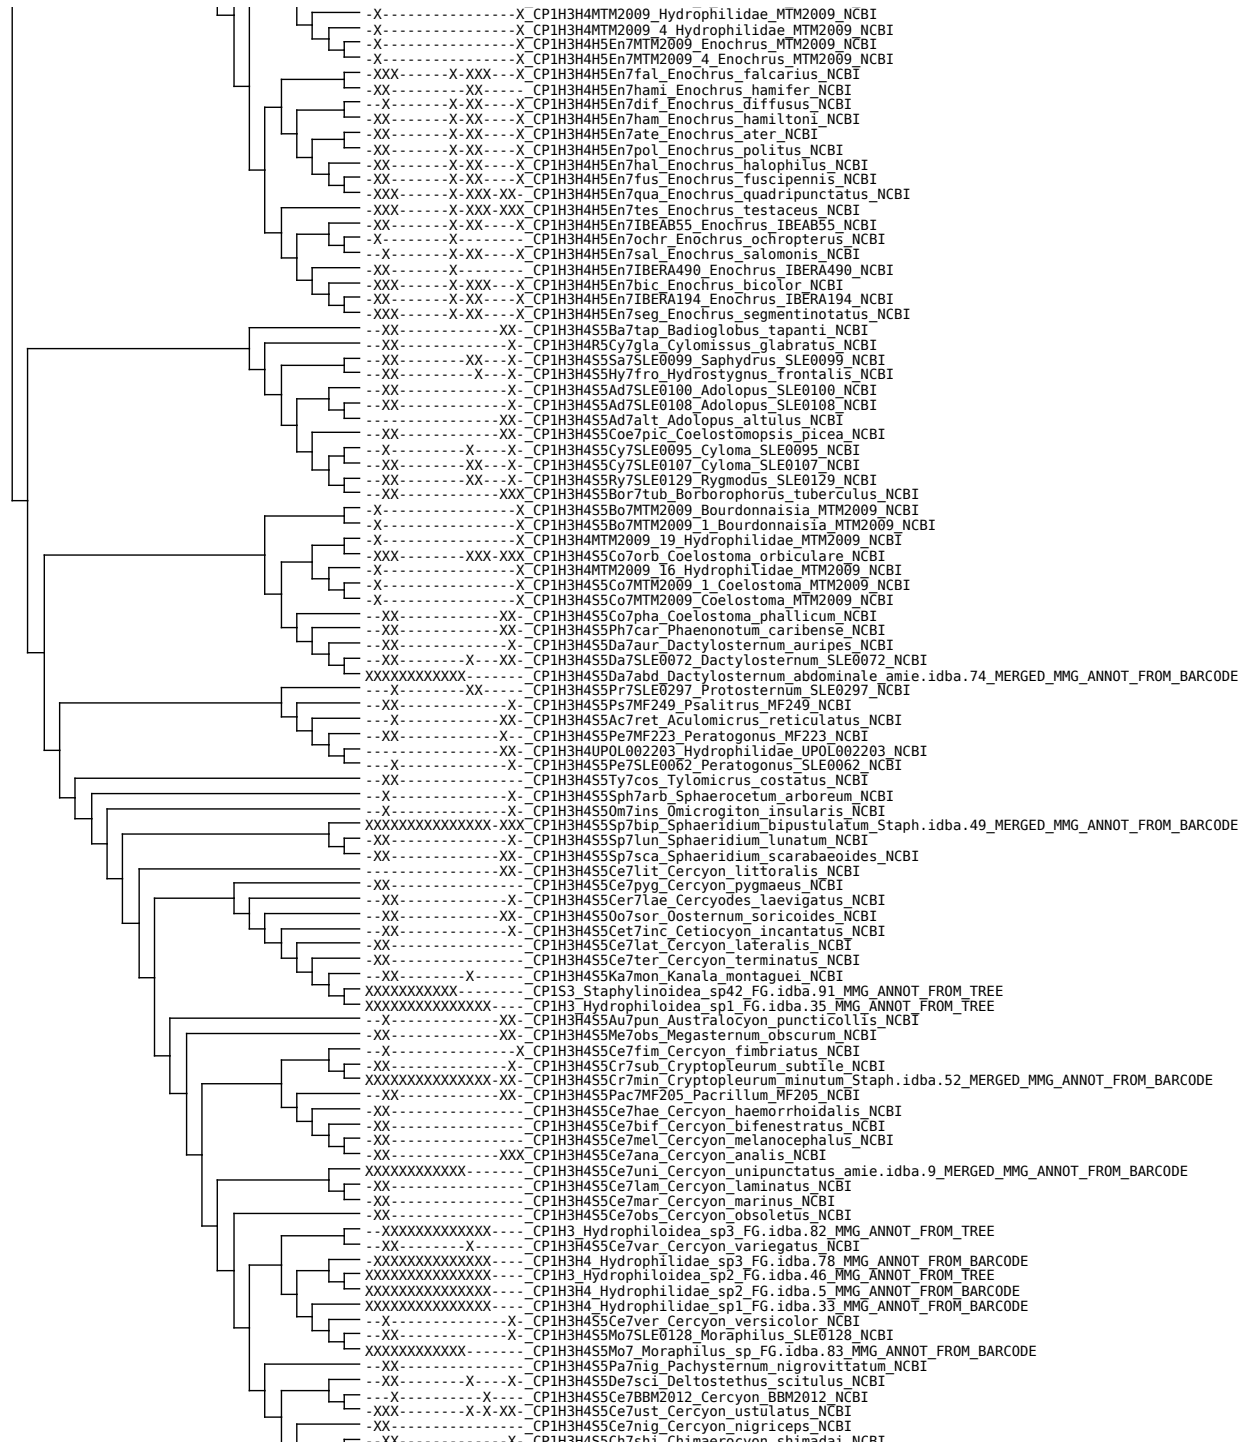

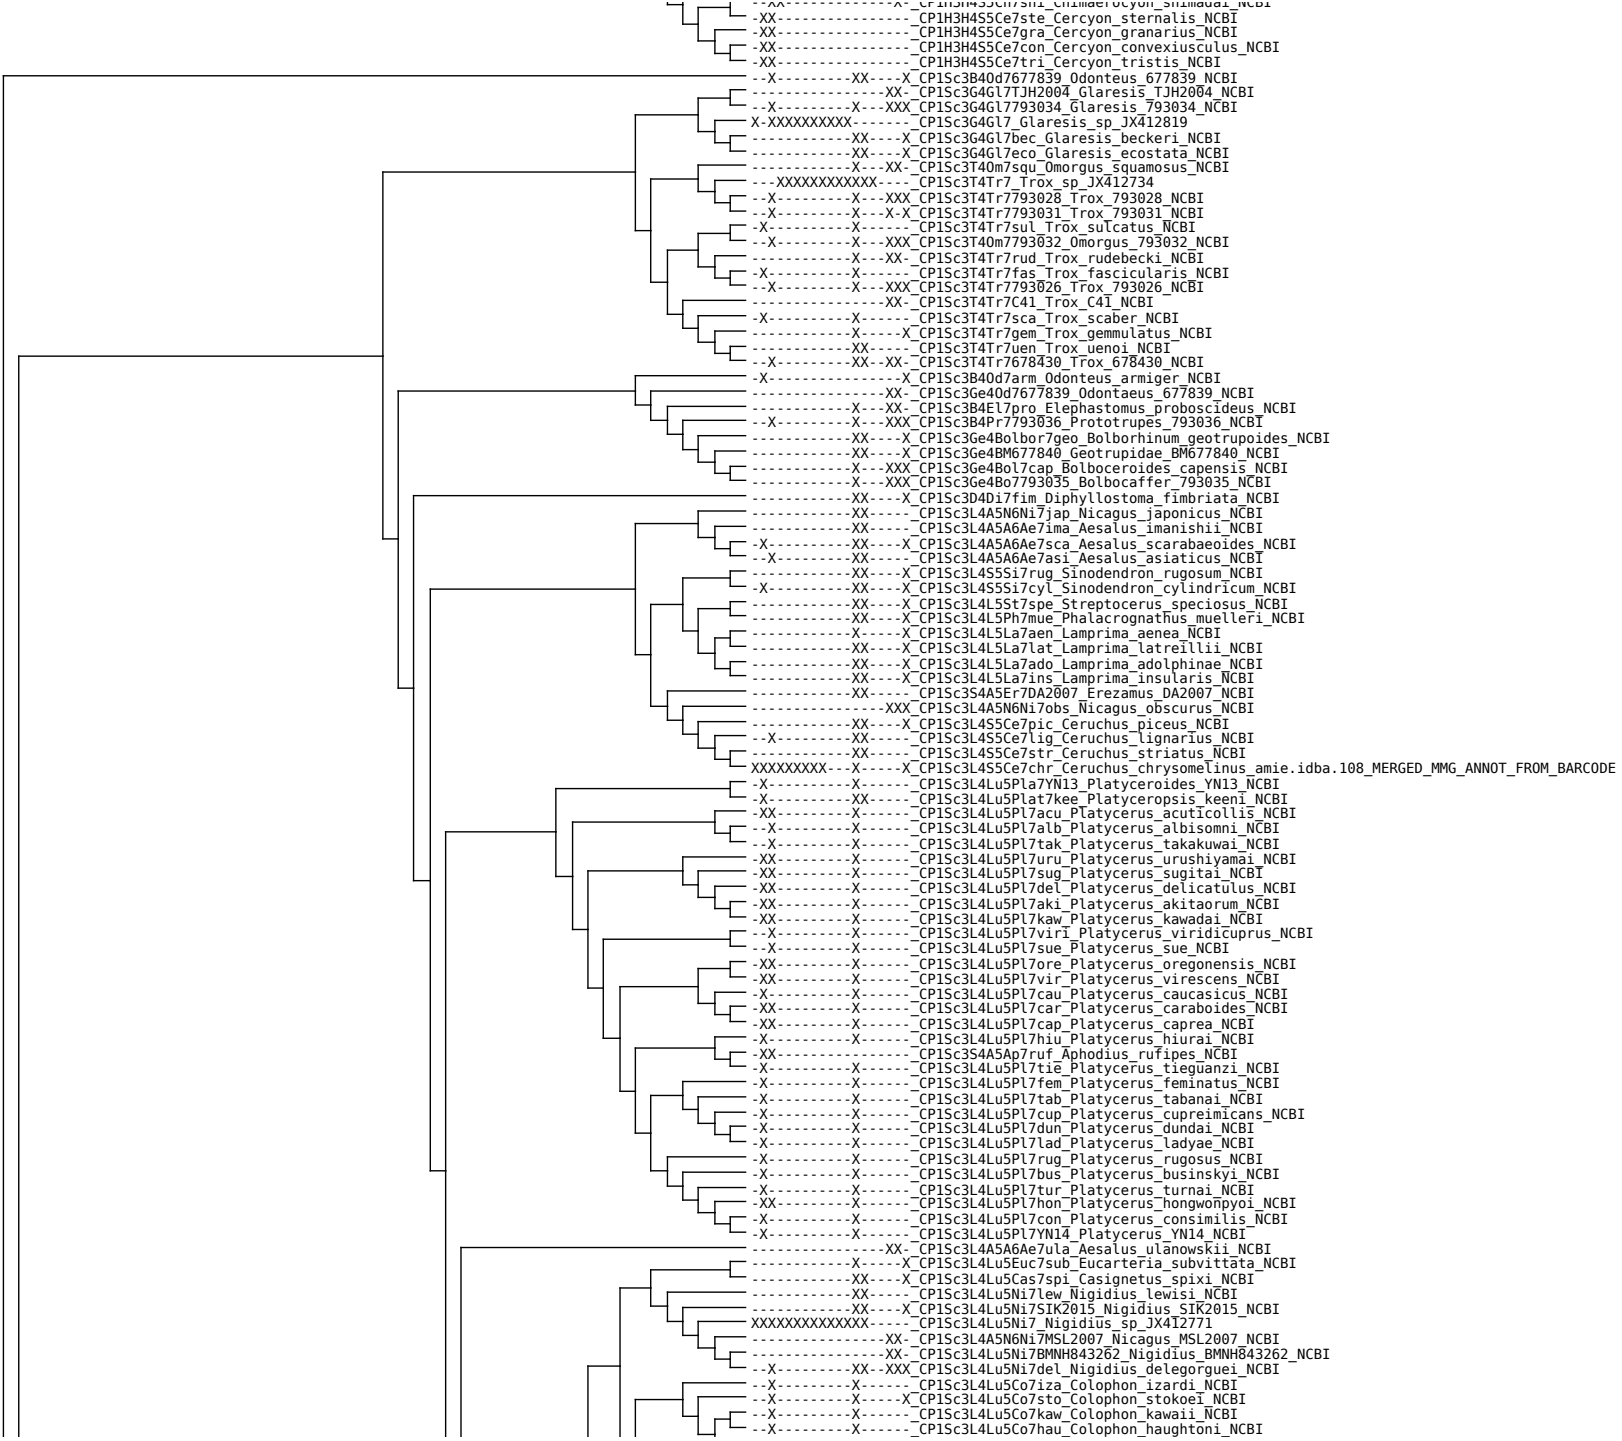

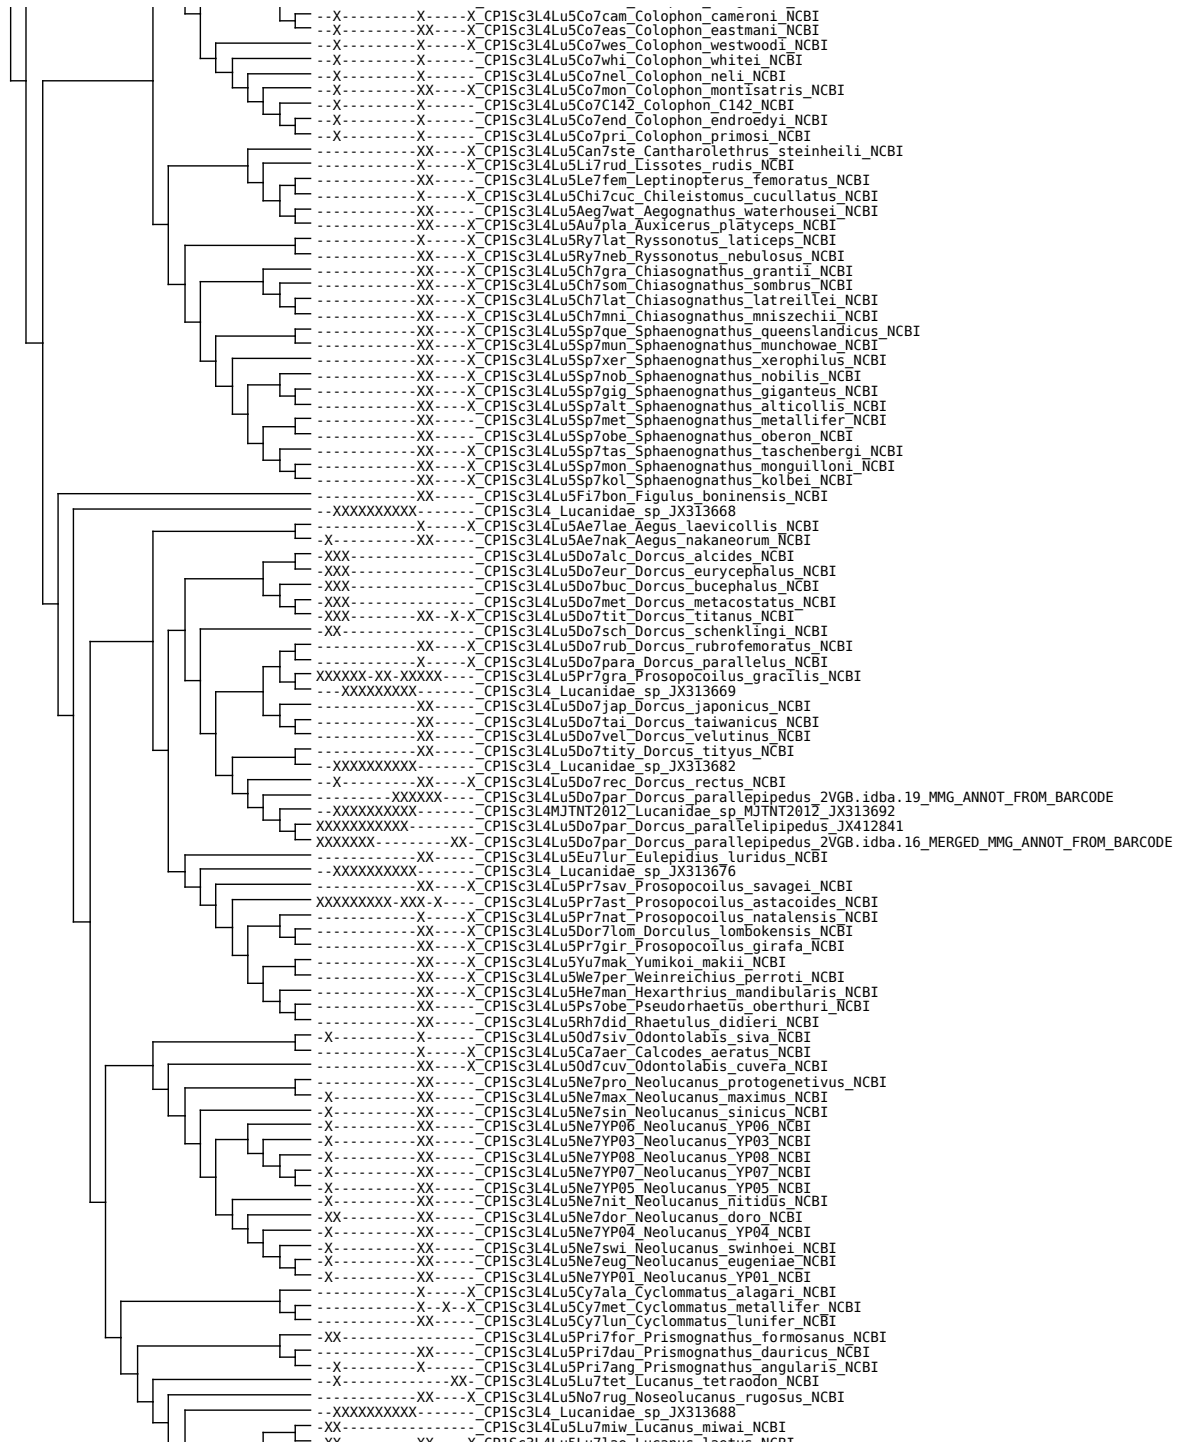

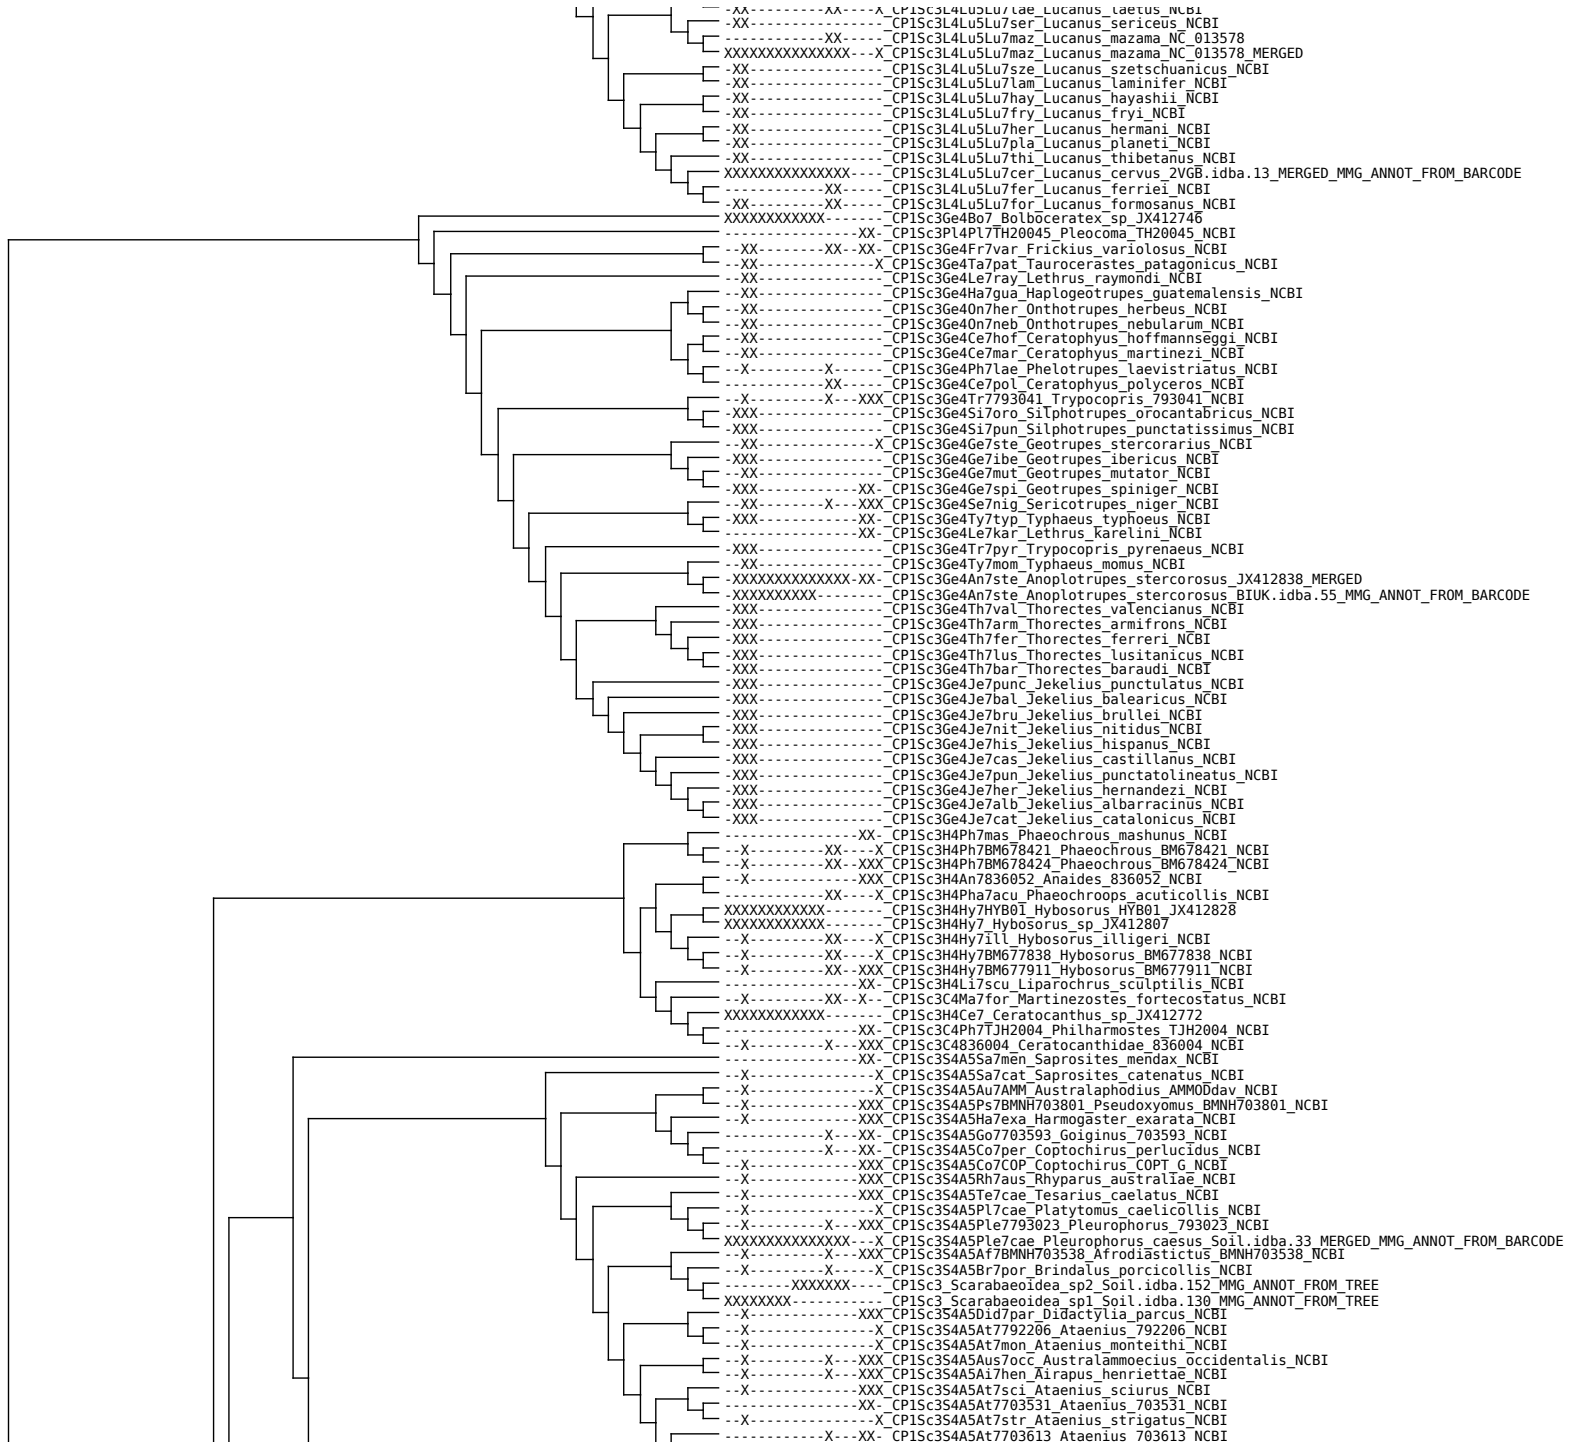





CP1Sc354A5Ap7na1 Aphodius naemanni NCBI  
CP1Sc354A5Ap7hyd Aphodius hydrochaeris NCBI  
CP1Sc354A5Ap7proc Aphodius proci NCBI  
CP1Sc354A5Ap7dep Aphodius depressus NCBI  
CP1Sc354A5Ap7dis Aphodius distinctus NCBI  
CP1Sc354A5Ap7obs Aphodius obscurus NCBI  
CP1Sc354A5Ap7cri Aphodius cribricollis NCBI  
CP1Sc354A5Ap7con Aphodius constans NCBI  
CP1Sc354A5Ap7lin Aphodius lineolatus NCBI  
CP1Sc354A5Ap7abd Aphodius abdominalis NCBI  
CP1Sc354A5Ap7pus Aphodius pusillus NCBI  
CP1Sc354A5Ap7coe Aphodius coenosus NCBI  
CP1Sc354A5Ap7ate Aphodius ater NCBI  
CP1Sc354A5Ap7sti Aphodius sticticus NCBI  
CP1Sc354A5Ap7bor Aphodius borealis NCBI  
CP1Sc354A5Ap7nig Aphodius nigrivittis NCBI  
CP1Sc354A5Ap7quad Aphodius quadrimaculatus NCBI  
CP1Sc354A5Ap7pro Aphodius prodromus NCBI  
CP1Sc354A5Ap7mel Aphodius melanoticus NCBI  
CP1Sc354A5Ap7sph Aphodius sphaelatus NCBI  
CP1Sc354A5Ap7mer Aphodius merdarius Soil idba.93\_MERGED\_MMG\_ANNOT\_FROM\_BARCODE  
CP1Sc354A5Ap7pyr Aphodius pyramiformis NCBI  
CP1Sc354A5Ap7scro Aphodius scrofa NCBI  
CP1Sc354S5De17pul Delopleurus pulus NCBI  
CP1Sc354S5Copt7klu Coptorhina klugii NCBI  
CP1Sc354S5Copt7nit Coptorhina nitidipennis NCBI  
CP1Sc354S5Copt7dgi Coptorhina dgii NCBI  
CP1Sc354S5Fr7arm Frankenbergerius armatus NCBI  
CP1Sc354S5Copt7679795 Coptorhina 679795 NCBI  
CP1Sc354S5Sa7tub Sarophorus tuberculatus NCBI  
CP1Sc354S5Sa7cos Sarophorus costatus NCBI  
CP1Sc354S5C60d7pus Odontoloma pusillum NCBI  
CP1Sc354S5Dic7des Dicranocara deschodti NCBI  
CP1Sc354S5C6By7con Byrrhidium convexum NCBI  
CP1Sc354S5C6By7nam Byrrhidium namaquensis NCBI  
CP1Sc354S5C6Nam7dav Namakwanus davisi NCBI  
CP1Sc354S5C6Pa7dgi Panelus dgii NCBI  
CP1Sc354S5C6Al7sim Alyscaenothoila similis NCBI  
CP1Sc354S5C6Ou7tom Outenikwanus tomentosus NCBI  
CP1Sc354S5C6Si7oub Silvaphilus oubosiensis NCBI  
CP1Sc354S5C6En7par Endroedyolus paradoxus NCBI  
CP1Sc354S5C6Ham7psa Hammondantus psammophilus NCBI  
CP1Sc354S5C6Pe7alp Peckolus alpinus NCBI  
CP1Sc354S5Oc7pun Ochicanthon punctatus NCBI  
CP1Sc354S5C6Epa7mas Epactoides masoalae NCBI  
CP1Sc354S5C6Epa7sem Epactoides semiaeneus NCBI  
CP1Sc354S5C6Epa7tii Epactoides tiinae NCBI  
CP1Sc354S5C6Epa7rah Epactoides rahagai NCBI  
CP1Sc354S5C6Epa7fem Epactoides femoralis NCBI  
CP1Sc354S5C6Epa7maj Epactoides major NCBI  
CP1Sc354S5C6Epa7per Epactoides perrieri NCBI  
CP1Sc354S5C6Epa7BMNH669910 Epactoides BMNH669910 NCBI  
CP1Sc354S5C6Epa7fro Epactoides frontalis NCBI  
CP1Sc354S5C6Epa7SM2013 Epactoides SM2013 NCBI  
CP1Sc354S5C6Epa7vir Epactoides viridicollis NCBI  
CP1Sc354S5C6Epa7BMNH669891 Epactoides BMNH669891 NCBI  
CP1Sc354S5C6Epa7lis Epactoides lissus NCBI  
CP1Sc354S5C6Epa7BMNH669960 Epactoides BMNH669960 NCBI  
CP1Sc354S5C6Epa7inc Epactoides incertus NCBI  
CP1Sc354S5C6Epa7spi Epactoides spinicollis NCBI  
CP1Sc354S5C6Epa7man Epactoides mangabeensis NCBI  
CP1Sc354S5C6Epa7ols Epactoides oloufieffi NCBI  
CP1Sc354S5C6Epa7han Epactoides hanskii NCBI  
CP1Sc354S5C6Epa7hel Epactoides helena NCBI  
CP1Sc354S5C6Epa7mah Epactoides mahaboi NCBI  
CP1Sc354S5C6Na7ate Nanos ater NCBI  
CP1Sc354S5C6Na7rub Nanos rubrosignatus NCBI  
CP1Sc354S5C6Na7min Nanos minutus NCBI  
CP1Sc354S5C6Apo7dar Apotolamprus darainaensis NCBI  
CP1Sc354S5C6Apo7MTM2009 Apotolamprus MTM2009 NCBI  
CP1Sc354S5C6Apo7man Apotolamprus manoboensis NCBI  
CP1Sc354S5C6Na7HKW2010 Nanos HKW2010 NCBI  
CP1Sc354S5C6Na7neo Nanos neoelectrinus NCBI  
CP1Sc354S5C6Apo7MTM2009\_1 Apotolamprus MTM2009 NCBI  
CP1Sc354S5C6Apo7cya Apotolamprus cyanescens NCBI  
CP1Sc354S5C6Ar7cya Arachnodes cyanescens NCBI  
CP1Sc354S5C6Na7sem Nanos semiscrobos NCBI  
CP1Sc354S5C6Ar7sem Arachnodes semipunctatus NCBI  
CP1Sc354S5C6Na7NanMIT4452 Nanos NanMIT4452 NCBI  
CP1Sc354S5C6Na7NanMIT4453 Nanos NanMIT4453 NCBI  
CP1Sc354S5C6Apo7zom Apotolamprus zombitsyensis NCBI  
CP1Sc354S5C6Apo7lat Apotolamprus latipennis NCBI  
CP1Sc354S5C6Ar7bal Arachnodes balianus NCBI  
CP1Sc354S5C6Apo7han Apotolamprus hanskii NCBI  
CP1Sc354S5C6Apo7qua Apotolamprus quadrinotatus NCBI  
CP1Sc354S5C6Apo7hel Apotolamprus helena NCBI  
CP1Sc354S5C6Apo7quad Apotolamprus quadrimaculatus NCBI  
CP1Sc354S5C6Apo7mil Apotolamprus miloti NCBI  
CP1Sc354S5C6Apo7BMNH673991 Apotolamprus BMNH673991 NCBI  
CP1Sc354S5C6Na7pun Nanos punctatus NCBI  
CP1Sc354S5C6Apo7rub Apotolamprus rubromaculatus NCBI  
CP1Sc354S5C6Na7MTM2009 Nanos MTM2009 NCBI  
CP1Sc354S5C6Na7han Nanos hanskii NCBI  
CP1Sc354S5C6Na7bic Nanos bicoloratus NCBI  
CP1Sc354S5C6Na7MTM2009\_2 Nanos MTM2009 NCBI  
CP1Sc354S5C6Na7MTM2009\_1 Nanos MTM2009 NCBI

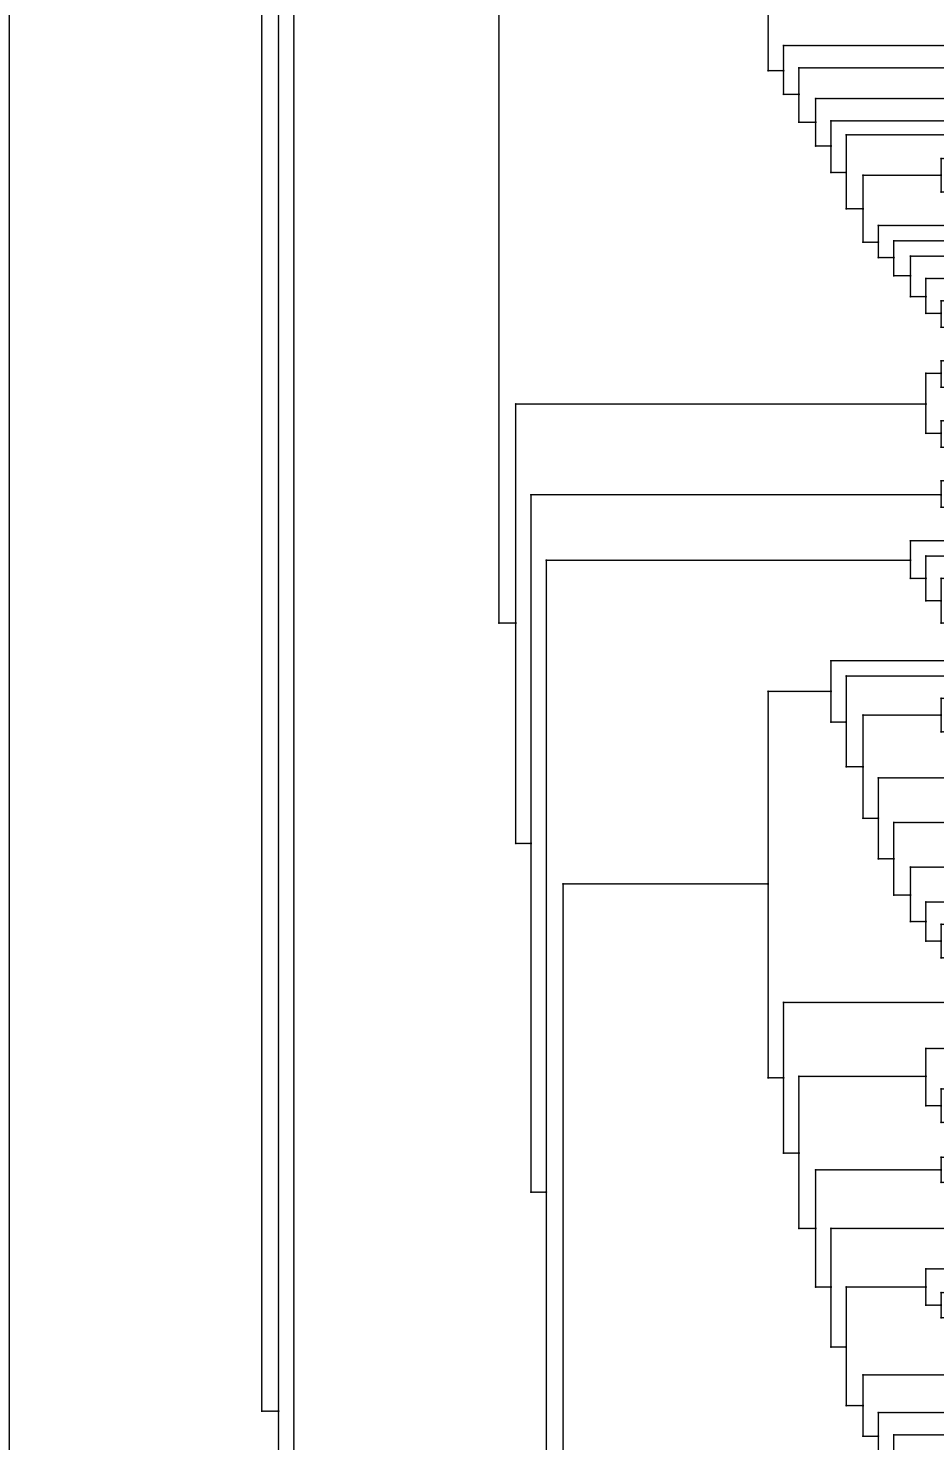

---XXX-----X-X-X---\_CP1Sc3S4S5C6Na7pey\_Nanos\_peyriërsi\_NCB1  
---XX-----X-----CP1Sc3S4S5C6Na7nit\_Nanos\_nitens\_NCB1  
---XX-----X-----CP1Sc3S4S5C6Na7cly\_Nanos\_clypeatus\_NCB1  
---XXX-----X-X-X---CP1Sc3S4S5C6Na7dub\_Nanos\_dubitatus\_NCB1  
---XX-----X-X-X---CP1Sc3S4S5C6Na7vie\_Nanos\_viettei\_NCB1  
---XXX-----X-X-X---CP1Sc3S4S5C6Na7occ\_Nanos\_occidentalis\_NCB1  
---XX-----X-----CP1Sc3S4S5C6Na7vad\_Nanos\_vadoni\_NCB1  
---XX-----X-----CP1Sc3S4S5C6Na7man\_Nanos\_manomboensis\_NCB1  
---XXX-----X-X-X---CP1Sc3S4S5C6Na7bim\_Nanos\_bimaculatus\_NCB1  
-----X-----X---CP1Sc3S4S5De7lmi\_Demarziella\_imitatrix\_NCB1  
-----X-----X---CP1Sc3S4S5De7mir\_Demarziella\_mirifica\_NCB1  
---X-----XX---XXX-CP1Sc3S4S5Bd7bow\_Bdelyroptis\_bowditchi\_NCB1  
---X-----X-----X-CP1Sc3S4S5Ur7dgi1\_Uroxys\_dgi1\_NCB1  
-----X-----X---X-CP1Sc3S4S5Ur7dgi2\_Uroxys\_dgi2\_NCB1  
---X-----XX---X-CP1Sc3S4S5Ur7BMNH669339\_Uroxys\_BMNH669339\_NCB1  
---X-----X-----X-CP1Sc3S4S5Ur7mic\_Uroxys\_micros\_NCB1  
---X-----XX---X-CP1Sc3S4S5Ur7pyg\_Uroxys\_pygmaeus\_NCB1  
XXXXXXXXXXXXXXXXXX---CP1Sc3\_Scarabaeoidea\_sp3\_Panama.Idba.89\_MMG\_ANNOT\_FROM\_TREE  
-----X-----XX---X-CP1Sc3S4S5Eu6Eu7BMNH669090\_Eurysternus\_BMNH669090\_NCB1  
XXXXXXXXXXXXXXXXXX---X-CP1Sc3S4S5Eu6Eu7ham\_Eurysternus\_hamaticollis\_CS.Idba.53\_MERGED\_MMG\_ANNOT\_FROM\_BARCODE  
XXXXXXXXXXXXXXXXXX---CP1Sc3S4S5Eu6Eu7car\_Eurysternus\_caribaeus\_Scarb.Idba.17\_MMG\_ANNOT\_FROM\_BARCODE  
XXXXXXXXXXXXXXXXXX---CP1Sc3S4S5Eu6Eu7car\_Eurysternus\_caribaeus\_CS.Idba.59\_MMG\_ANNOT\_FROM\_BARCODE  
XXXXXXXXXXXXXXXXXX---CP1Sc3S4S5Eu6Eu7foe\_Eurysternus\_foedus\_CS.Idba.52\_MMG\_ANNOT\_FROM\_BARCODE  
---X-----X-----X-CP1Sc3S4S5Eu6Eu7vel\_Eurysternus\_velutinus\_NCB1  
XXXXXXXXXXXXXXXXXX---CP1Sc3S4S5Eu6Eu7foe\_Eurysternus\_foedus\_Scarb.Idba.1\_MERGED\_MMG\_ANNOT\_FROM\_BARCODE  
XXXXXXXXXXXXXXXXXX---X-CP1Sc3S4S5Eu6Eu7inf\_Eurysternus\_inflexus\_CS.Idba.17\_MERGED\_MMG\_ANNOT\_FROM\_BARCODE  
-----X-----X---XXX-CP1Sc3S4S5Eu6Eu7ang\_Eurysternus\_angustulus\_NCB1  
XXXXXXXXXXXXXXXXXX---CP1Sc3S4S5Eur7\_Eurysternus\_sp3\_Panama.Idba.47\_MMG\_ANNOT\_FROM\_BARCODE  
-----X-----X-----X-CP1Sc3S4S5Eu6Eu7ple\_Eurysternus\_plebeius\_NCB1  
---XX-----X-----XXX-CP1Sc3S4S5C6An7con\_Anachalcos\_convexus\_NCB1  
---X-----X-----X---X-CP1Sc3S4S5C6An7sut\_Anachalcos\_suturalis\_NCB1  
-----X-----X---X-CP1Sc3S4S5Can7law\_Canthodimorpha\_lawrencei\_NCB1  
---X-----X-----X-CP1Sc3S4S5Cat7phi\_Catharsius\_philus\_NCB1  
-----X-----X---XXX-CP1Sc3S4S5Cat7cal\_Catharsius\_calaharicus\_NCB1  
---XX-----X-----X-CP1Sc3S4S5Cat7mol\_Catharsius\_molossus\_NCB1  
---X-----X-----X-CP1Sc3S4S5Cat7ses\_Catharsius\_sesostriis\_NCB1  
---X-----X-----XXX-CP1Sc3S4S5Me7opa\_Metacatharsius\_opacus\_NCB1  
-----X-----X---X-CP1Sc3S4S5Me7mar\_Metacatharsius\_marani\_NCB1  
---X-----X-----X-CP1Sc3S4S5Me7exi\_Metacatharsius\_exiguiformis\_NCB1  
-----X-----X---X-CP1Sc3S4S5Me7dgi1\_Metacatharsius\_dgi1\_NCB1  
---X-----X-----X-CP1Sc3S4S5C6Ep7scr\_Epirinus\_scrobiculatus\_NCB1  
---X-----X-----X-CP1Sc3S4S5C6Ep7dgi2\_Epirinus\_dgi2\_NCB1  
---X-----X-----XXX-CP1Sc3S4S5C6Ep7aen\_Epirinus\_aeneus\_NCB1  
-----X-----X---X-CP1Sc3S4S5C6Ep7sil\_Epirinus\_silvestris\_NCB1  
---X-----X-----X-CP1Sc3S4S5C6Ep7con\_Epirinus\_convexus\_NCB1  
-----X-----X---X-CP1Sc3S4S5C6Ep7dgi1\_Epirinus\_dgi1\_NCB1  
---X-----X-----X-CP1Sc3S4S5C6Ep7hil\_Epirinus\_hilaris\_NCB1  
---X-----X-----X-CP1Sc3S4S5C6Apl7mul\_Aphenogocelus\_multiserriatus\_NCB1  
-----X-----X---X-CP1Sc3S4S5C6Mo7dgi1\_Monoplistes\_dgi1\_NCB1  
---X-----X-----X-CP1Sc3S4S5C6Ca7sma\_Canthon\_smaragdulus\_NCB1  
-----X-----X---XX-CP1Sc3S4S5C6Sc7dgi1\_Scybalophagus\_dgi1\_NCB1  
---X-----X-----XXX-CP1Sc3S4S5C6Me7can\_Megathoposoma\_candezei\_NCB1  
-----X-----X---XXX-CP1Sc3S4S5C6Ha7aff\_Hansreia\_affinis\_NCB1  
---X-----X-----X-CP1Sc3S4S5C6Eu7dyt\_Eudinopus\_dytiscoides\_NCB1  
-----X-----X---X-CP1Sc3S4S5C6Ca7ind\_Canthon\_indigaceus\_NCB1  
---X-----X-----XXX-CP1Sc3S4S5C6Ca7vir\_Canthon\_viridis\_NCB1  
-----X-----X---X-CP1Sc3S4S5C6Ca7lut\_Canthon\_luteicollis\_NCB1  
XXXXXXXXXX---X-----CP1Sc3S4S5C6Ca7aeq\_Canthon\_aequinoctialis\_Panama.Idba.243\_MERGED\_MMG\_ANNOT\_FROM\_BARCODE  
-----XXXXXXXXXX---CP1Sc3\_Scarabaeoidea\_sp1\_Panama.Idba.169\_MMG\_ANNOT\_FROM\_TREE  
---XX-XX---CP1Sc3\_Scarabaeoidea\_sp2\_Panama.Idba.219\_MMG\_ANNOT\_FROM\_TREE  
---X-----X-----XXX-CP1Sc3S4S5C6Scy7pyg\_Scybalocanthon\_pygidialis\_NCB1  
---X-----XX---X-CP1Sc3S4S5C6Ca7lam\_Canthon\_lamprimus\_NCB1  
XXXXXXXXXXXXXXXXXX---CP1Sc3S4\_Scarabaeidae\_sp3\_Fg.Idba.52\_MMG\_ANNOT\_FROM\_BARCODE  
-----X-----X---X-CP1Sc3S4S5An7pan\_Anomiopus\_panamensis\_NCB1  
-----X-----X---X-CP1Sc3S4S5C6Ca7doe\_Canthon\_doesburgi\_NCB1  
---X-----X-----X-CP1Sc3S4S5C6Ca7BMNH670496\_Canthon\_BMNH670496\_NCB1  
---X-----XX---X-CP1Sc3S4S5G6Gy7BMNH676998\_Gymnopleurus\_BMNH676998\_NCB1  
---XX-----X-----X-CP1Sc3S4S5G6Gy7fla\_Gymnopleurus\_flagellatus\_NCB1  
---X-----X-----X-CP1Sc3S4S5G6Gy7hum\_Gymnopleurus\_humanus\_NCB1  
---XX-----X-----X-CP1Sc3S4S5G6Gy7mop\_Gymnopleurus\_mopsus\_NCB1  
---X-----X-----XXX-CP1Sc3S4S5G6Gy7vir\_Gymnopleurus\_virens\_NCB1  
---X-----X-----X-X-CP1Sc3S4S5G6A17tha\_Allogymnopleurus\_thalassinus\_NCB1  
---X-----X-----X-CP1Sc3S4S5G6Ga7nit\_Garreta\_nitens\_NCB1  
---X-----X-----X-CP1Sc3S4S5G6Pa7str\_Paragymnopleurus\_striatus\_NCB1  
---X-----X-----X-CP1Sc3S4S5G6Pa7dgi1\_Paragymnopleurus\_dgi1\_NCB1  
---X-----X-----XXX-CP1Sc3S4S5G6Pa7mau\_Paragymnopleurus\_maurus\_NCB1  
---X-----X-----X-X-CP1Sc3S4S5C6De7gib\_Deltochilum\_gibbosum\_NCB1  
---X-----X-----X-CP1Sc3S4S5C6De7ama\_Deltochilum\_amazonicum\_NCB1  
---X-----X-----X-CP1Sc3S4S5C6De7car\_Deltochilum\_carinatum\_NCB1  
---X-----X-----X-CP1Sc3S4S5C6De7bar\_Deltochilum\_barbipes\_NCB1  
---X-----X-----X-CP1Sc3S4S5C6De7pse\_Deltochilum\_pseudoparile\_NCB1  
---X-----X-----X-CP1Sc3S4S5Co6L17mut\_Litocopris\_muticus\_NCB1  
---XXX-----X-----X-CP1Sc3S4S5Co6Co7lun\_Copris\_lunaris\_NCB1  
---X-----X-----X-CP1Sc3S4S5Co6Co7agn\_Copris\_agnus\_NCB1  
---X-----X-----X-CP1Sc3S4S5Co6Co7tri\_Copris\_tripartitus\_NCB1  
---X-----X-----XXX-CP1Sc3S4S5Co6Co7lug\_Copris\_lugubris\_NCB1  
---X-----X-----X-CP1Sc3S4S5Co6Co7aen\_Copris\_aeneus\_NCB1  
---X-----X-----X-CP1Sc3S4S5Co6Co7amy\_Copris\_amyntor\_NCB1  
---X-----X-----X-CP1Sc3S4S5Co6Co7dgi1\_Copris\_dgi1\_NCB1  
---X-----X-----X-CP1Sc3S4S5Cat7SM2012\_Catharsius\_SM2012\_NCB1  
---X-----X-----X-CP1Sc3S4S5Co6Co7cor\_Copris\_cornifrons\_NCB1  
---XX-----X-----X-CP1Sc3S4S5Co6Co7his\_Copris\_hispanicus\_NCB1  
---X-----X-----X-CP1Sc3S4S5Co6Co7con\_Copris\_confucius\_NCB1  
---X-----X-----X-CP1Sc3S4S5Co6Co7sin\_Copris\_sinicus\_NCB1  
---X-----X-----X-CP1Sc3S4S5A6At7dgi1\_Ateuchus\_dgi1\_NCB1

---XXX-----XX---- CP1Sc35455Abta/aur\_Lantnidium\_auritex\_NCB1  
-X-----X---XXX CP1Sc35455A6At7chr\_Ateuchus\_chrysopteg NCBI  
-X-----XX---- CP1Sc35455A6At7CWC2007\_Ateuchus\_CWC2007\_NCB1  
-X-----X---X CP1Sc35455A6At7ecu\_Ateuchus\_ecuadorense\_NCB1  
-X-----X---X CP1Sc35455E6En7lob\_Ennearabidus\_lobocephalus\_NCB1  
-XX-----X---XXX CP1Sc35455E6Eu7ara\_Eucranium\_arachnoides\_NCB1  
-X-----X---X CP1Sc35455E6G17ste\_Glyphoderus\_sterquilinus\_NCB1  
-X-----X---X CP1Sc35455E6An7bil\_Anomiopsoides\_biloba\_NCB1  
-XX-----X---XXX CP1Sc35455E6An7het\_Anomiopsoides\_heteroclyta\_NCB1  
-X-----X---XXX CP1Sc35455Pha7sal\_Phanaeus\_sallei\_NCB1  
-X-----X--- CP1Sc35455Pha7cam\_Phanaeus\_cambeforti\_NCB1  
-XX-----X---XXX CP1Sc35455Ox7con\_Oxysternon\_conspicillatum\_NCB1  
-X-----X---X CP1Sc35455Dia7mim\_Diabroctis\_mimas\_NCB1  
-X-----X--- CP1Sc35455Pha7dem\_Phanaeus\_demon\_NCB1  
-X-X-----XX--- CP1Sc35455Pha7CWC2007\_Phanaeus\_CWC2007\_NCB1  
-X-----X---X CP1Sc35455Cop7lan\_Coprophanaeus\_lancifer\_NCB1  
-X-----X---XXX CP1Sc35455Den7bah\_Dendropaemon\_bahianum\_NCB1  
-XX-----X--- CP1Sc35455Pha7end\_Phanaeus\_endymion\_NCB1  
-XX-----X---XXX CP1Sc35455Cop7tel\_Coprophanaeus\_telamon\_NCB1  
-X-----X---X CP1Sc35455Cop7dgi1\_Coprophanaeus\_dgi1\_NCB1  
XXXXXXXXXXXXXXX CP1Sc35455Cop7 Coprophanaeus sp CS.idba.11 MMG\_ANNOT\_FROM\_BARCODE  
-X-----X---X CP1Sc35455Gr7aer\_Gromphas\_aeruginosa\_NCB1  
-X-----X---X CP1Sc35455Ja7SM2013\_Janssensantus\_SM2013\_NCB1  
-X-----X---X CP1Sc35455C6Ta7SM2013\_Tanzanolus\_SM2013\_NCB1  
XXXXXXXXXXXXXXX CP1Sc354 Scarabaeidae\_sp1 FG.idba.12 MMG\_ANNOT\_FROM\_BARCODE  
-X-----X---X CP1Sc35455A6Ca7har\_Canthidium\_haroldi\_NCB1  
XXXXXXXXXXXXXXX CP1Sc354 Scarabaeidae\_sp2 FG.idba.40 MMG\_ANNOT\_FROM\_BARCODE  
-X-----X---X CP1Sc35455A6Ca7ruf\_Canthidium\_rufinum\_NCB1  
-X-----X---XXX CP1Sc35455A6Ca7gua\_Canthidium\_guanacaste\_NCB1  
-X-----X---X CP1Sc35455A6Ca7tha\_Canthidium\_thalassinum\_NCB1  
-X-----XX--- CP1Sc35455Di7sat\_Dichotomius\_satanas\_NCB1  
-X-----X---X CP1Sc35455Di7dgi1\_Dichotomius\_dgi1\_NCB1  
-X-----X---X CP1Sc35455Di7bor\_Dichotomius\_boreus\_NCB1  
-X-----X---X CP1Sc35455Di7yuc\_Dichotomius\_yucatanus\_NCB1  
-X-----X---X CP1Sc35455Di7par\_Dichotomius\_parcepunctatus\_NCB1  
-XX-----X--- CP1Ch3C4B5B6Ac7pall\_Acanthoscelides\_pallidipennis\_NCB1  
-X-----X--- CP1Sc35455Di7nis\_Dichotomius\_nisus\_NCB1  
-X-----X--- CP1Sc35455Di7lae\_Dichotomius\_laeicolis\_NCB1  
-X-----X--- CP1Sc35455Di7bos\_Dichotomius\_bos\_NCB1  
-X-----X--- CP1Sc35455Di7sem\_Dichotomius\_semisquamosus\_NCB1  
-X-----X--- CP1Sc35455Di7ser\_Dichotomius\_sericeus\_NCB1  
-X-----X--- CP1Sc35455Di7gem\_Dichotomius\_geminatus\_NCB1  
-X-----X--- CP1Sc35455C6Ar7mori\_Arachnodes\_morio\_NCB1  
-XX-----X-X--- CP1Sc35455C6Ar7cup\_Arachnodes\_cuparius\_NCB1  
-X-----X---X CP1Sc35455C6Ar7MTM2009\_10\_Arachnodes\_MTM2009\_NCB1  
-XX-----X-X-X--- CP1Sc35455C6Ar7kel\_Arachnodes\_kelifelyi\_NCB1  
-X-----X---X CP1Sc35455C6Ar7MTM2009\_9\_Arachnodes\_MTM2009\_NCB1  
-X-----X--- CP1Sc35455C6Ar7HKW2010\_Arachnodes\_HKW2010\_NCB1  
-X-----X--- CP1Sc35455C6Ar7mah\_Arachnodes\_mahafalyensis\_NCB1  
-XX-----X-X-X--- CP1Sc35455C6Ar7sap\_Arachnodes\_saprinoides\_NCB1  
-X-----X---X CP1Sc35455C6Ar7MTM2009\_2\_Arachnodes\_MTM2009\_NCB1  
-X-----X---X CP1Sc35455C6Ar7MTM2009\_5\_Arachnodes\_MTM2009\_NCB1  
-X-----X--- CP1Sc35455C6Ar7pus\_Arachnodes\_pusillus\_NCB1  
-X-----X---X CP1Sc35455C6Ar7MTM2009\_4\_Arachnodes\_MTM2009\_NCB1  
-XX-----X-X--- CP1Sc35455C6Ar7and\_Arachnodes\_andriai\_NCB1  
-X-----X--- CP1Sc35455Ps7sem\_Pseudoarachnodes\_semichalceus\_NCB1  
-X-----X---X CP1Sc35455C6Ar7MTM2009\_3\_Arachnodes\_MTM2009\_NCB1  
-X-----X---X CP1Sc35455C6Ar7BMH669969\_Arachnodes\_BMH669969\_NCB1  
-XX-----X-X-X--- CP1Sc35455Ps7han\_Pseudoarachnodes\_hanski\_NCB1  
-XX-----X-X--- CP1Sc35455C6Ar7man\_Arachnodes\_manaitrai\_NCB1  
-XX-----X-X-X--- CP1Sc35455C6Ar7L02006\_Arachnodes\_L02006\_NCB1  
-X-----X---X CP1Sc35455C6Ar7MTM2009\_12\_Arachnodes\_MTM2009\_NCB1  
-X-----X--- CP1Sc35455C6Ar7semi\_Arachnodes\_semitidus\_NCB1  
-X-----X--- CP1Sc35455C6Ar7gen\_Arachnodes\_genieri\_NCB1  
-X-----X---X CP1Sc35455C6Ar7MTM2009\_8\_Arachnodes\_MTM2009\_NCB1  
-X-----X--- CP1Sc35455C6Ar7HKW2010\_1\_Arachnodes\_HKW2010\_NCB1  
-X-----X--- CP1Sc35455C6Ar7rut\_Arachnodes\_ruteri\_NCB1  
-X-----X--- CP1Sc35455C6Ar7mant\_Arachnodes\_manta-soae\_NCB1  
-X-----X--- CP1Sc35455C6Ar7del\_Arachnodes\_delphinensis\_NCB1  
-X-----X---X CP1Sc35455C6Ar7MTM2009\_Arachnodes\_MTM2009\_NCB1  
-X-----X---X CP1Sc35455C6Ar7MTM2009\_1\_Arachnodes\_MTM2009\_NCB1  
-X-----X---X CP1Sc35455C6Ar7MTM2009\_6\_Arachnodes\_MTM2009\_NCB1  
-X-----X---X CP1Sc35455C6Ar7MTM2009\_7\_Arachnodes\_MTM2009\_NCB1  
-XX-----X-X-X--- CP1Sc35455C6Ar7apo\_Arachnodes\_apotolamproides\_NCB1  
-X-----X---X CP1Sc35455C6Ar7ant\_Arachnodes\_antoetrae\_NCB1  
-X-----X--- CP1Sc35455C6Ar7gro\_Arachnodes\_grossepunctatus\_NCB1  
-X-----X--- CP1Sc35455C6Ar7pra\_Arachnodes\_prasinus\_NCB1  
-X-----X---X CP1Sc35455C6Ar7spl\_Arachnodes\_splendidus\_NCB1  
-X-----X--- CP1Sc35455C6Ar7mic\_Arachnodes\_micheli\_NCB1  
-X-----X--- CP1Sc35455C6Ar7glo\_Arachnodes\_globuloides\_NCB1  
-X-----X--- CP1Sc35455C6Ar7emm\_Arachnodes\_emmae\_NCB1  
-X-----X---X CP1Sc35455C6Ar7MTM2009\_11\_Arachnodes\_MTM2009\_NCB1  
-XX-----X-X-X--- CP1Sc35455C6Ar7sic\_Arachnodes\_sicardi\_NCB1  
-X-----X---XXX CP1Sc35455Onth7dia\_Ontherus\_diabolicus\_NCB1  
-X-----X--- CP1Sc35455C6G7pum\_Gyronotus\_pumilus\_NCB1  
-X-----X---X CP1Sc35455Tr7dgi1\_Trichillum\_dgi1\_NCB1  
-X-----X---XX CP1Sc35455C6Bo7cor\_Boletoscapter\_cornutus\_NCB1  
-X-----X---XXX CP1Sc35455Pe7dgi1\_Pedaria\_dgi1\_NCB1  
-X-----X--- CP1Sc35455Pe7CLS2009b\_Pedaria\_CLS2009b\_NCB1  
-X-----X--- CP1Sc35455Pe7CLS2009a\_Pedaria\_CLS2009a\_NCB1  
-X-----X---XXX CP1Sc35455De7int\_Demarziella\_interrupta\_NCB1  
-X-----X---XXX CP1Sc35455C6Cop7gla\_Coptodactyla\_glabricollis\_NCB1  
-X-----X--- CP1Sc35455C6Am7tri\_Amphistomus\_trispiculatus\_NCB1  
-X-----X---X CP1Sc35455C6Am7com\_Amphistomus\_complanatus\_NCB1  
-X-----X---XXX CP1Sc35455C6Co7hem\_Coproecus\_hemisphaericus\_NCB1  
-X-----X---XXX CP1Sc35455C6Ao7dai1\_Antenocanthon\_dai1\_NCB1

-X-----X-----CP1Sc3S4S5C6D17nig\_Diorygopyx\_niger NCBI  
 -X-----X-X---CP1Sc3S4S5C6D17inc\_Diorygopyx\_incomptus NCBI  
 -X-----X-----CP1Sc3S4S5C6D17tib\_Diorygopyx\_tibialis NCBI  
 -XX-----X-XXXX-CP1Sc3S4S5C6D17sim\_Diorygopyx\_simplicilunus NCBI  
 -X-----X-----CP1Sc3S4S5C6Sa7squ\_Saphobius\_squamulosus NCBI  
 -X-----X-XXX-CP1Sc3S4S5C6Sa7set\_Saphobius\_setosus NCBI  
 -X-----X-XXX-CP1Sc3S4S5Par7sim\_Paronthobium\_simplex NCBI  
 -X-----X-XXX-CP1Sc3S4S5Ano7tib\_Anonthobium\_tibiale NCBI  
 -X-----X-----CP1Sc3S4S5C6Pse7dgi1\_Pseudonthobium\_dgi1 NCBI  
 -X-----X-XXX-CP1Sc3S4S5C6Ig7fas\_Ignambia\_fasciculata NCBI  
 -X-----X-XXX-CP1Sc3S4S5C6Pse7fra\_Pseudonthobium\_fracticolloides NCBI  
 -X-----X-----CP1Sc3S4S5C6On7dgi1\_Onthobium\_dgi1 NCBI  
 -X-----X-X-X-CP1Sc3S4S5C6On7coo\_Onthobium\_cooki NCBI  
 -X-----X-XX-CP1Sc3S4S5C6Ps7BMNH679763\_Pseudignambia\_BMNH679763 NCBI  
 -X-----X-X-CP1Sc3S4S5C6Ps7dgi1\_Pseudignambia\_dgi1 NCBI  
 -X-----X-X-CP1Sc3S4S5C6Ps7dgi2\_Pseudignambia\_dgi2 NCBI  
 -X-----X-----CP1Sc3S4S5C6Le7bid\_Lepanus\_bidentatus NCBI  
 -X-----X-----CP1Sc3S4S5C6Le7pol\_Lepanus\_politus NCBI  
 -X-----X-X-CP1Sc3S4S5C6Le7nit\_Lepanus\_nitidus NCBI  
 -X-----X-XXX-CP1Sc3S4S5C6Le7ust\_Lepanus\_ustulatus NCBI  
 -X-----X-X-CP1Sc3S4S5C6Can7cas\_Canthosoma\_castelnaui NCBI  
 -X-----X-XX-CP1Sc3S4S5C6Ce7arm\_Cephalodesmius\_armiger NCBI  
 -X-----X-X-CP1Sc3S4S5C6Ce7qua\_Cephalodesmius\_quadridens NCBI  
 -X-----X-XXX-CP1Sc3S4S5C6Mo7cur\_Monoplistes\_curvipes NCBI  
 -X-----X-X-CP1Sc3S4S5C6Le7gla\_Lepanus\_glaber NCBI  
 -XX-----CP1Sc3S4S5C6Te7lae\_Temnoplectron\_laevae NCBI  
 -XX-----CP1Sc3S4S5C6Te7bor\_Temnoplectron\_bornemisszai NCBI  
 -XX-----CP1Sc3S4S5C6Te7maj\_Temnoplectron\_majoi NCBI  
 -XX-----CP1Sc3S4S5C6Te7bou\_Temnoplectron\_boucromontii NCBI  
 -XX-----X-XXX-CP1Sc3S4S5C6Te7fin\_Temnoplectron\_finnigani NCBI  
 -XX-----CP1Sc3S4S5C6Te7mon\_Temnoplectron\_monstrei NCBI  
 -XX-----CP1Sc3S4S5C6Te7inv\_Temnoplectron\_involutum NCBI  
 -XX-----CP1Sc3S4S5C6Te7sub\_Temnoplectron\_subvolutans NCBI  
 -XX-----CP1Sc3S4S5C6Te7coo\_Temnoplectron\_cooki NCBI  
 -XX-----CP1Sc3S4S5C6Te7dis\_Temnoplectron\_disruptum NCBI  
 -XX-----X-X-CP1Sc3S4S5C6Te7pol\_Temnoplectron\_politulum NCBI  
 -XX-----CP1Sc3S4S5C6Te7aen\_Temnoplectron\_aeneopiceum NCBI  
 -XX-----X-XXX-CP1Sc3S4S5C6C17bac\_Circellium\_bacchus NCBI  
 -X-----X-XXX-CP1Sc3S4S5He7and\_Heliocopris\_andersoni NCBI  
 -XX-----X-X-CP1Sc3S4S5He7ham\_Heliocopris\_hamadryas NCBI  
 -X-----X-X-CP1Sc3S4S5S6Sc7dgi1\_Scarabaeus\_dgi1 NCBI  
 -X-----X-X-CP1Sc3S4S5Pa7dgi1\_Pachysoma\_dgi1 NCBI  
 -XX-----CP1Sc3S4S5Pa7aes\_Pachysoma\_aesculapius NCBI  
 -XX-----X-CP1Sc3S4S5Pa7ben\_Pachysoma\_bennigseni NCBI  
 -XX-----CP1Sc3S4S5Pa7end\_Pachysoma\_endroeydi NCBI  
 -XX-----CP1Sc3S4S5Pa7gle\_Pachysoma\_glentoni NCBI  
 -XX-----X-CP1Sc3S4S5Pa7hip\_Pachysoma\_hippocrates NCBI  
 -XX-----CP1Sc3S4S5Pa7gar\_Pachysoma\_gariepinus NCBI  
 -XX-----CP1Sc3S4S5Pa7den\_Pachysoma\_denticollis NCBI  
 -XX-----CP1Sc3S4S5Pa7fit\_Pachysoma\_fitsimonsi NCBI  
 -XX-----CP1Sc3S4S5Pa7sch\_Pachysoma\_schinzi NCBI  
 -XX-----CP1Sc3S4S5Pa7str\_Pachysoma\_striatus NCBI  
 -XX-----X-CP1Sc3S4S5S6Kh7sub\_Kheper\_subaeneus NCBI  
 -X-----X-CP1Sc3S4S5S6Kh7bon\_Kheper\_bonellii NCBI  
 -XX-----X-XXX-CP1Sc3S4S5S6Kh7nig\_Kheper\_nigroaeneus NCBI  
 -XX-----X-CP1Sc3S4S5S6Sc7rad\_Scarabaeus\_radama NCBI  
 -XX-----X-CP1Sc3S4S5S6Sc7gor\_Scarabaeus\_goryi NCBI  
 -XX-----X-CP1Sc3S4S5S6Sc7vie\_Scarabaeus\_viettei NCBI  
 -XX-----X-CP1Sc3S4S5S6Sc7sat\_Scarabaeus\_satyri NCBI  
 -XX-----X-CP1Sc3S4S5S6Sc7zam\_Scarabaeus\_zambeziensis NCBI  
 -XX-----X-CP1Sc3S4S5Ne7pro\_Neateuchus\_proboscideus NCBI  
 -XX-----CP1Sc3S4S5Pa7rot\_Pachysoma\_rotundigenus NCBI  
 -XX-----CP1Sc3S4S5Pa7rod\_Pachysoma\_rodriguezi NCBI  
 -XX-----X-CP1Sc3S4S5S6Sc7wes\_Scarabaeus\_westwoodi NCBI  
 -XX-----X-CP1Sc3S4S5S6Sc7rus\_Scarabaeus\_rusticus NCBI  
 -XX-----X-CP1Sc3S4S5S6Sc7rug\_Scarabaeus\_rugosus NCBI  
 -XX-----XX-X-CP1Sc3S4S5S6Sc7SIK2015\_Scarabaeus\_SIK2015 NCBI  
 -XX-----X-X-CP1Sc3S4S5S6Sc7gal\_Scarabaeus\_galenus NCBI  
 -XX-----X-X-CP1Sc3S4S5S6Sc7boh\_Scarabaeus\_bohemani NCBI  
 -XX-----X-CP1Sc3S4S5S6Sc7fla\_Scarabaeus\_flavicornis NCBI  
 -X-----X-CP1Sc3S4S5S6Sc7SM2012\_Scarabaeus\_SM2012 NCBI  
 -XX-----X-CP1Sc3S4S5S6Sc7rub\_Scarabaeus\_rubripennis NCBI  
 -X-----X-XXX-CP1Sc3S4S5S6Dr7cos\_Drepanopodus\_costatus NCBI  
 -XX-----X-CP1Sc3S4S5S6Dr7pro\_Drepanopodus\_proximus NCBI  
 -XX-----X-CP1Sc3S4S5Pa7val\_Pachysoma\_valeflorae NCBI  
 -XX-----X-XXX-CP1Sc3S4S5S6Pa7fem\_Pachylomerus\_femoralis NCBI  
 -XX-----X-CP1Sc3S4S5S6Sc7ada\_Scarabaeus\_adamastor NCBI  
 -XX-----X-X-CP1Sc3S4S5S6Sc7hip\_Scarabaeus\_hippias NCBI  
 -XX-----CP1Sc3S4S5S6Sc7cic\_Scarabaeus\_cicatricosus NCBI  
 -XXX-----CP1Sc3S4S5S6Sc7sac\_Scarabaeus\_sacer NCBI  
 -XX-----CP1Sc3S4S5S6Sc7piu\_Scarabaeus\_pius NCBI  
 -XX-----CP1Sc3S4S5S6Sc7thp\_Scarabaeus\_thphon NCBI  
 -X-----X-CP1Sc3S4S5S6Sc7SM2012\_1\_Scarabaeus\_SM2012 NCBI  
 -XX-----X-XXX-CP1Sc3S4S5S6Sc7bri\_Scarabaeus\_brittoni NCBI  
 -X-----X-CP1Sc3S4S5Anon7fre\_Anonychitis\_freyi NCBI  
 -XX-----X-CP1Sc3S4S5Ch7hun\_Cheironitis\_hungaricus NCBI  
 -XX-----X-CP1Sc3S4S5Ch7sca\_Cheironitis\_scaevola NCBI  
 -X-----X-XXX-CP1Sc3S4S5Ch7hop\_Cheironitis\_hoplosternus NCBI  
 XXXXXXXXXXXXXXXX-X-CP1Sc3S4S5Eu6Eu7car\_Cheironitis\_hoplosternus\_Scarab.idba.15\_MERGED\_MMG\_ANNOT\_FROM\_BARCODE  
 -XX-----X-CP1Sc3S4S5On7bel\_Onitis\_belial NCBI  
 -X-----X-CP1Sc3S4S5On7sub\_Onitis\_subopacus NCBI  
 XXXXXXXXXXXXXXXX-X-CP1Sc3S4S5On7fal\_Onitis\_falcatus\_CS.idba.22\_MERGED\_MMG\_ANNOT\_FROM\_BARCODE  
 -XXXX-----CP1Sc3\_Scarabaeoidea\_sp7\_CS.idba.87\_MMG\_ANNOT\_FROM\_TREE  
 XXXXXXXXXXXXXXXX-X-CP1Sc3S4S5On7ale\_Onitis\_alexis\_Scarab.idba.9\_MMG\_ANNOT\_FROM\_BARCODE  
 XXXXXXXXXXXXXXXX-X-CP1Sc3S4S5On7ale\_Onitis\_alexis\_CS.idba.60\_MERGED\_MMG\_ANNOT\_FROM\_BARCODE

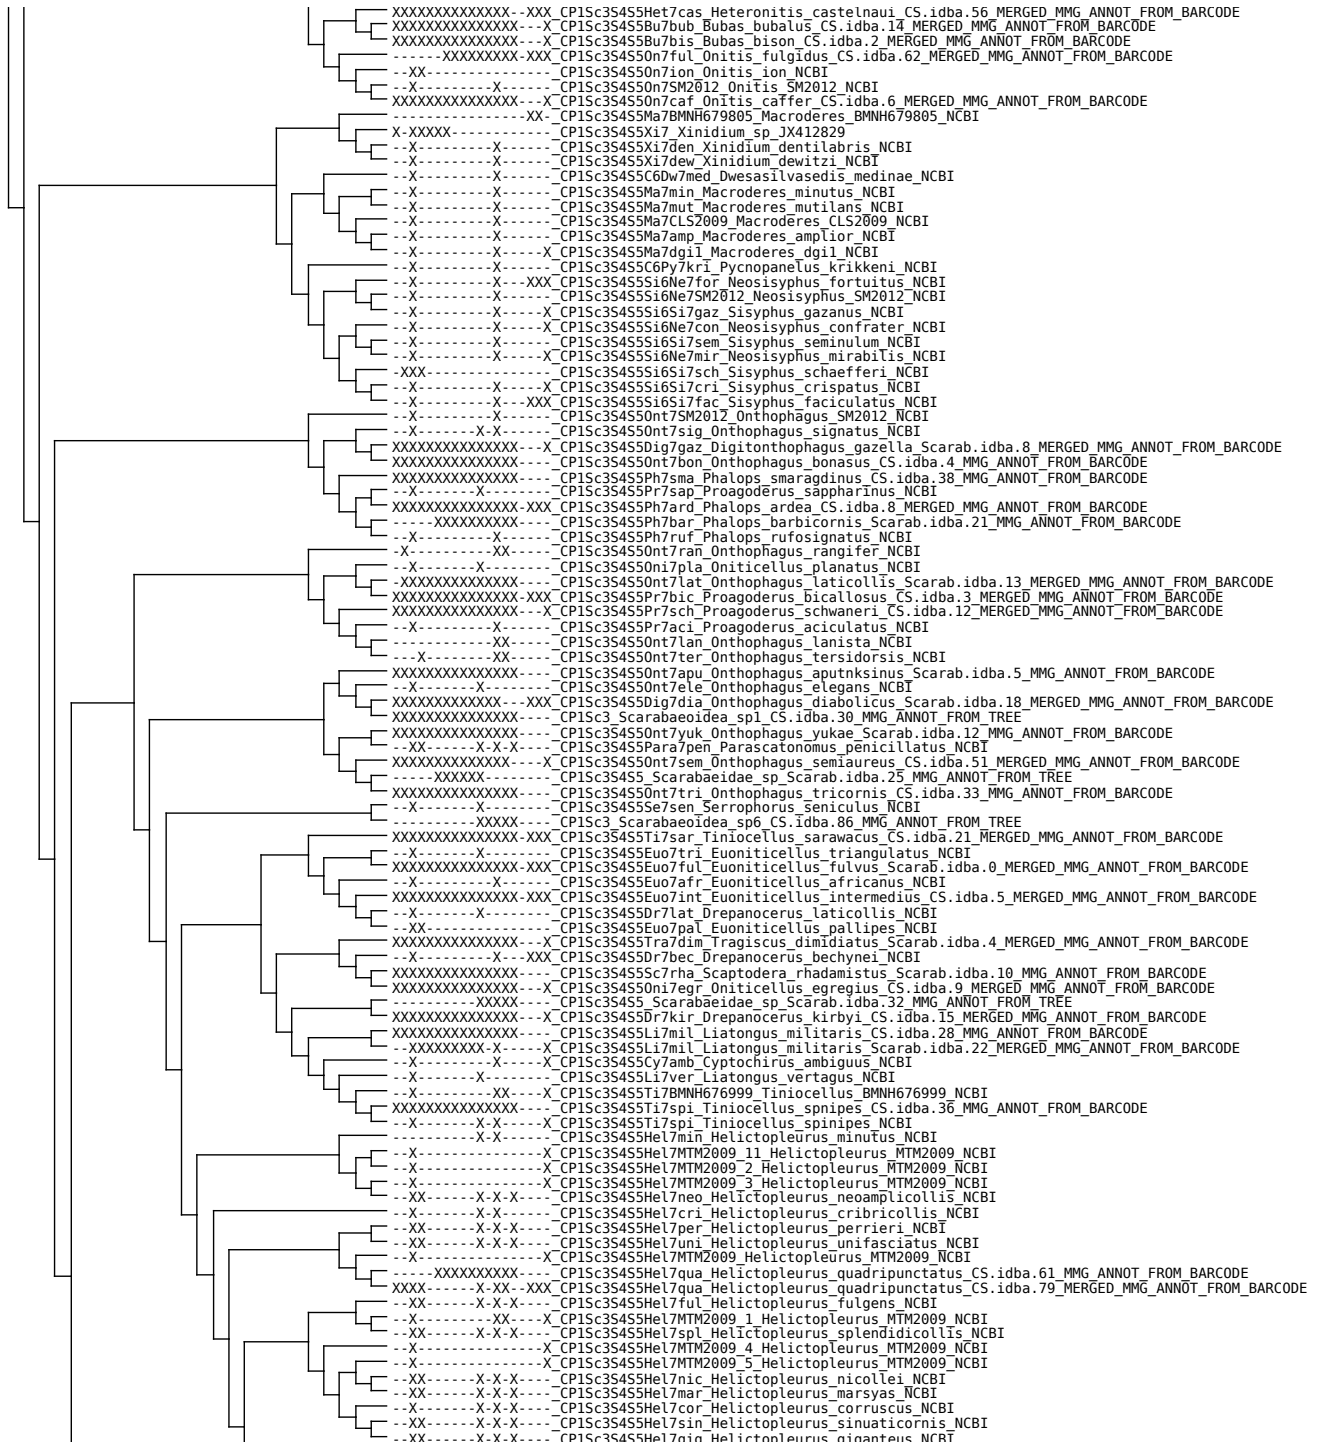

Phylogenetic tree showing relationships between various species, primarily Helictopleurus and Onthophagus. The tree is rooted on the left and branches out to the right. Species names are listed on the right side of the tree, often followed by accession numbers or identifiers. The tree shows a clear division into two main groups: Helictopleurus (top) and Onthophagus (bottom). Within Helictopleurus, there are several sub-clades, including those with 'MTM' identifiers and those with 'He7' identifiers. Within Onthophagus, there are numerous species, many of which are grouped together with 'XXXXXX' or 'XXXXXXX' markers, indicating they are likely members of the same clade or have similar characteristics. The tree is highly detailed, showing many small branches and nodes.

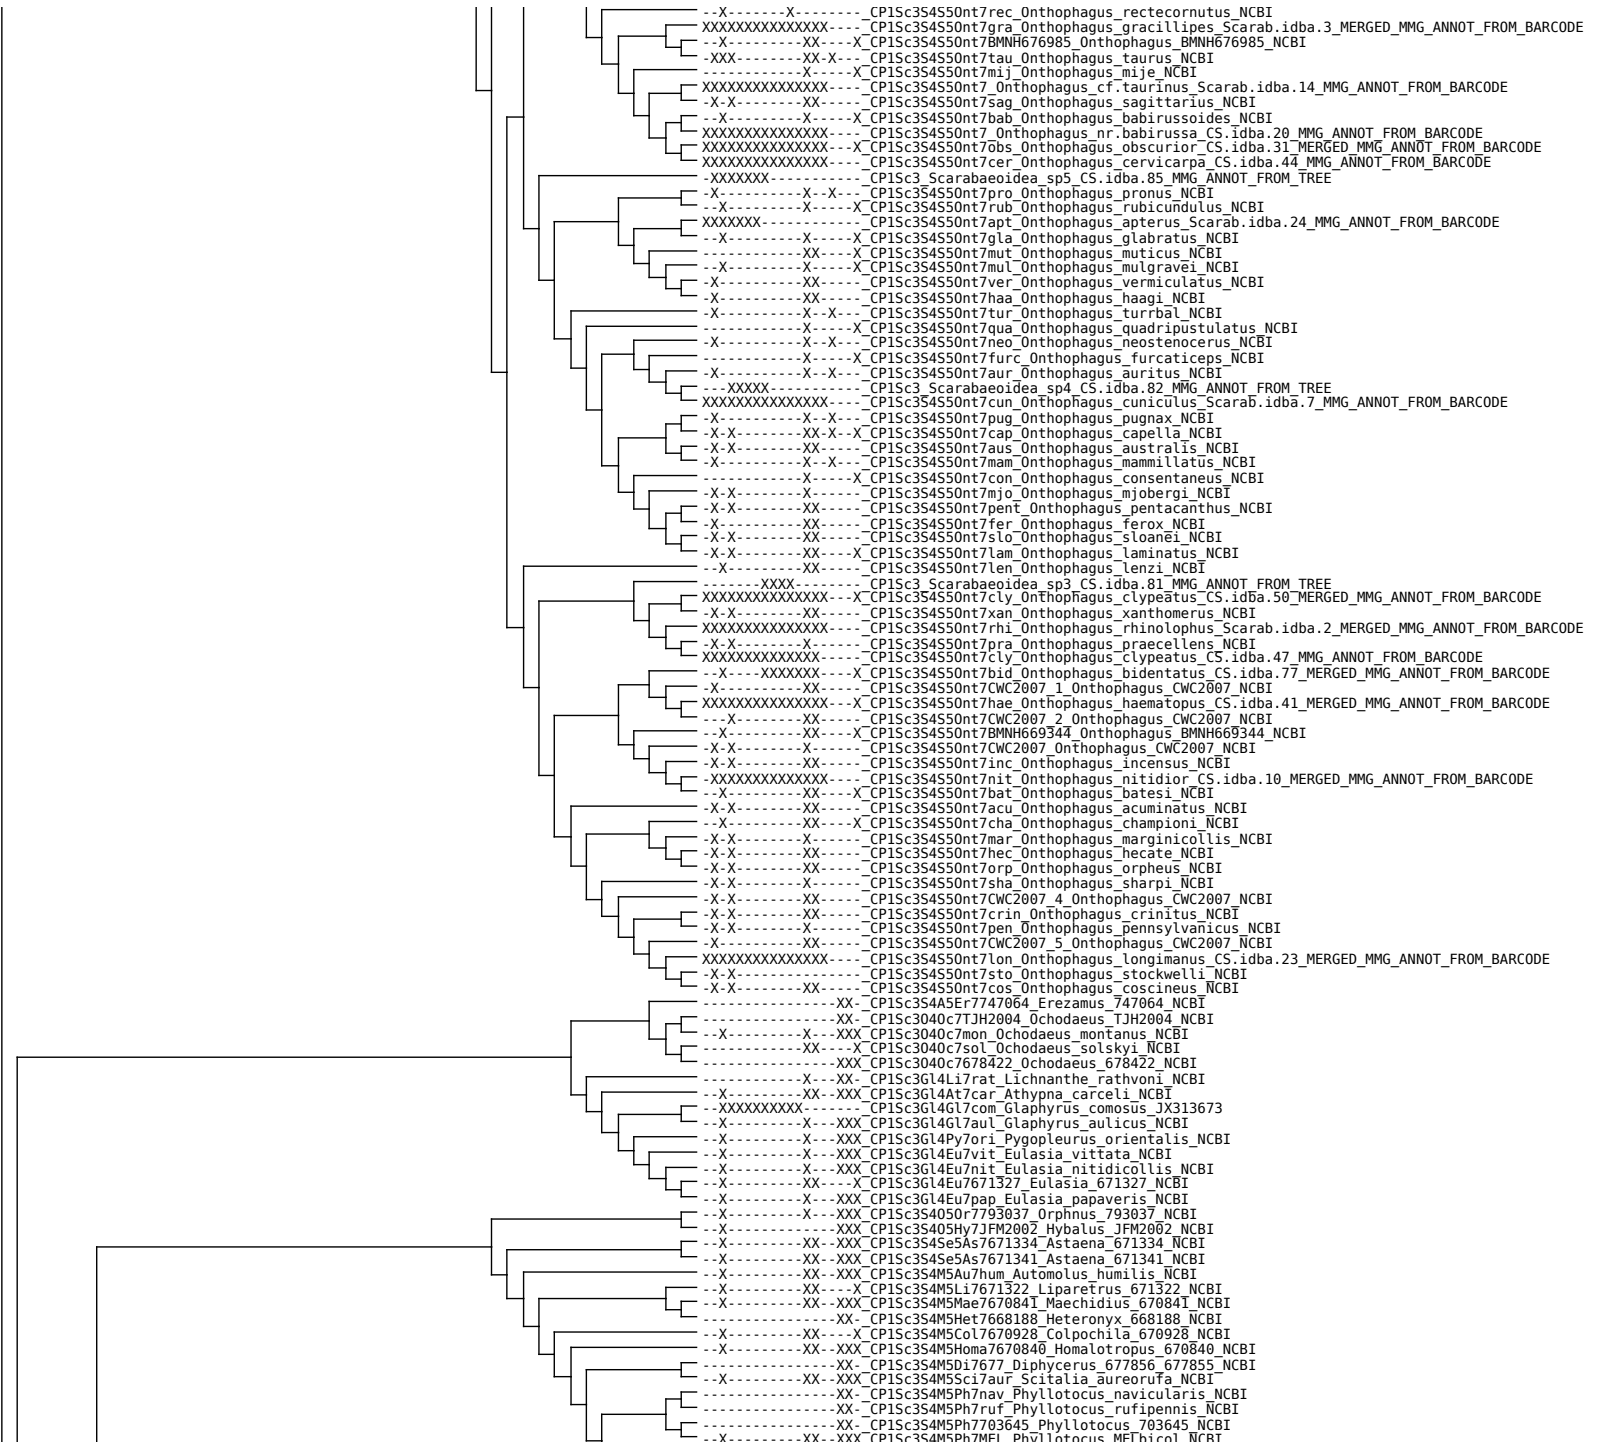

XX-XX-CP1Sc3S4Se5As7671333 Astaena\_671333 NCBI  
-X-XXX-CP1Sc3S4M5671352\_MeloLonthinae\_671352 NCBI  
-X-CP1Sc3S4M5Het7671323\_Heteronyx\_671323 NCBI  
-X-XX-CP1Sc3S4M5Het7670839\_Heteronyx\_670839 NCBI  
XXX-CP1Sc3S4M5Pr7mod\_Prodontria\_modesta NCBI  
-X-X-CP1Sc3S4M5Co7zea\_Costelytra\_zealandica NCBI  
-X-CP1Sc3S4M5Da7ish\_Dasylepida\_ishigakiensis NCBI  
-XX-CP1Sc3S4M5Chei7ges\_Cheironotus\_gestroi NCBI  
-X-XXX-CP1Sc3G14Pr7bim\_Propomacrus\_bimicronatus NCBI  
-XXXXXXXX-CP1Sc3S4M5Euc7\_Euchirus\_sp\_JX313679  
-X-XX-CP1Sc3S4M5Euc7dup\_Euchirus\_dupontianus NCBI  
XXXXXXXXXXXXXXXX-CP1Sc3S4M5Chei7jan\_Cheironotus\_jansoni\_NC\_023246\_MERGED  
-X-XX-CP1Sc3S4M5Ec7umb\_Echyra\_umbriana NCBI  
-X-XX-CP1Sc3S4M5Lio7Arg1\_Lioegys\_Arg1 NCBI  
-X-XX-CP1Sc3S4M5Ap7671353\_Apogonia\_671353 NCBI  
-X-XX-CP1Sc3S4M5Ce7bic\_Ceratogonia\_bicornuta NCBI  
-X-XX-CP1Sc3S4M5Ap7671463\_Apogonia\_671463 NCBI  
-X-XX-CP1Sc3S4M5D1c7ova\_Dichecephala\_ovata NCBI  
-XX-CP1Sc3S4M5Ap7DA2006\_Apogonia\_DA2006 NCBI  
-XX-CP1Sc3S4M5Ap7677867\_Apogonia\_677867 NCBI  
-X-XX-CP1Sc3S4M5Ap7703614\_Apogonia\_703614 NCBI  
-XX-CP1Sc3S4M5Ap7cri\_Apogonia\_crIbricolis NCBI  
-X-XX-CP1Sc3S4M5Par7MA2\_Paramorphochelus\_MA2 NCBI  
-X-XX-CP1Sc3S4M5Par7agr\_Paramorphochelus\_agricola NCBI  
-X-XXX-CP1Sc3S4M5Apo7671482\_Apomorphochelus\_671482 NCBI  
-XX-XX-CP1Sc3S4M5Ch7747062\_Chasmatopterus\_747062 NCBI  
-XX-CP1Sc3S4M5Ch7vil\_Chasmatopterus\_villosus NCBI  
-X-CP1Sc3S4M5Hom7JFM2002\_Homaloplia\_JFM2002 NCBI  
-X-XX-XXX-CP1Sc3S4M5Ch7694788\_Chasmatopterus\_694788 NCBI  
-X-CP1Sc3S4M5Pach7cal\_Pachycnema\_calviniana NCBI  
-X-XX-CP1Sc3S4M5Lep7DA2011\_Lepithrix\_DA2011 NCBI  
-X-XX-CP1Sc3S4M5Er7DA2011\_1\_Eriesthis\_DA2011 NCBI  
-X-CP1Sc3S4M5Er7vul\_Eriesthis\_vulpina NCBI  
-X-XX-CP1Sc3S4M5Er7sem\_Eriesthis\_semitrita NCBI  
-X-XX-CP1Sc3S4M5Er7hyp\_Eriesthis\_hypocrita NCBI  
-X-XX-CP1Sc3S4M5Er7ves\_Eriesthis\_vestita NCBI  
-XX-CP1Sc3S4M5Er7DA2011\_Eriesthis\_DA2011 NCBI  
-X-XX-CP1Sc3S4M5Mic7DA2011\_Microplus\_DA2011 NCBI  
-XX-CP1Sc3S4M5Con7SA1\_Congella\_SA1 NCBI  
-X-XX-CP1Sc3S4M5Con7DA2011\_1\_Congella\_DA2011 NCBI  
-X-XX-CP1Sc3S4M5Con7DA2011\_Congella\_DA2011 NCBI  
-X-XX-CP1Sc3S4M5671507\_MeloLonthinae\_671507 NCBI  
-XX-CP1Sc3S4M5Amo7MA3\_Amorphochelus\_MA3 NCBI  
-X-XX-CP1Sc3S4M5Mi7mon\_Michaeloplia\_montana NCBI  
-XX-CP1Sc3S4M5Mi7pro\_Michaeloplia\_prolata NCBI  
-XX-CP1Sc3S4M5Cl7DA2011\_1\_Clania\_DA2011 NCBI  
-XX-CP1Sc3S4M5Cl7DA2011\_1\_Clania\_DA2011 NCBI  
-X-CP1Sc3S4M5Le7nan\_Lepidiota\_nana NCBI  
-X-XX-CP1Sc3S4M5Sce7DA2011\_Scelophysa\_DA2011 NCBI  
-XX-XX-CP1Sc3S4M5Hop7gra\_Hoplia\_graminicola NCBI  
-XX-CP1Sc3S4M5Hop7DA2011\_Hoplia\_DA2011 NCBI  
-XX-CP1Sc3S4M5Hop7kor\_Hoplia\_korbi NCBI  
-XX-XX-CP1Sc3S4M5Hop7phi\_Hoplia\_philanthus NCBI  
-XX-CP1Sc3S4M5Hop7arg\_Hoplia\_argentea NCBI  
-X-XX-CP1Sc3S4M5Hop7far\_Hoplia\_farinosa NCBI  
-XX-CP1Sc3S4M5Cyl7DA2011\_2\_Cylinchus\_DA2011 NCBI  
-X-XX-CP1Sc3S4M5Cyl7DA2011\_1\_Cylinchus\_DA2011 NCBI  
-X-XX-CP1Sc3S4M5Cyl7DA2011\_Cylinchus\_DA2011 NCBI  
-X-X-CP1Sc3S4M5Do7DA2011\_Dolichoplia\_DA2011 NCBI  
-XX-CP1Sc3S4M5DA2011\_MeloLonthinae\_DA2011 NCBI  
-X-XX-CP1Sc3S4M5Om7DA2011\_1\_Omocrates\_DA2011 NCBI  
-XX-CP1Sc3S4M5Om7DA2011\_Omocrates\_DA2011 NCBI  
-X-XX-CP1Sc3S4M5Cer7SA1\_Ceratochelus\_SA1 NCBI  
-X-XX-CP1Sc3S4M5Cer7SA2\_Ceratochelus\_SA2 NCBI  
-X-XX-CP1Sc3S4M5Hete7SA2\_Heterochelus\_SAZ NCBI  
-XX-CP1Sc3S4M5Gy7DA2011\_Gymnoloma\_DA2011 NCBI  
-X-XX-CP1Sc3S4M5Mo7DA2011\_Monocheilus\_DA2011 NCBI  
-X-XX-CP1Sc3S4M5Mo7s9SA1\_Monocheilus\_s9SA1 NCBI  
-X-XX-CP1Sc3S4M5Hete7kul\_Heterochelus\_Kulzer NCBI  
-X-XX-CP1Sc3S4M5Hete7kulz\_Heterochelus\_Kulzer NCBI  
-X-XX-CP1Sc3S4M5Hete7def\_Heterochelus\_defector NCBI  
-X-XX-CP1Sc3S4M5Hete7DA2011\_Heterochelus\_DA2011 NCBI  
-X-XX-CP1Sc3S4M5Hete7sul\_Heterochelus\_sulphureus NCBI  
-X-XX-CP1Sc3S4M5Hete7vul\_Heterochelus\_vulpinus NCBI  
-XX-CP1Sc3S4M5Pa7703620\_Pachypus\_703620 NCBI  
-X-XXX-CP1Sc3S4M5Pa7can\_Pachypus\_candidae NCBI  
-XX-CP1Sc3S4M5Di7677855\_Diphycerus\_677855 NCBI  
-X-XX-CP1Sc3S4M5Di7678420\_Diphycerus\_678420 NCBI  
-X-XX-CP1Sc3S4M5Di7677856\_Diphycerus\_677856 NCBI  
-XX-CP1Sc3S4M5Li7obs\_Liparetrus\_obscurior NCBI  
-X-XXX-CP1Sc3S4M5Bu7ech\_Buettikeria\_echinosa NCBI  
-X-XX-CP1Sc3S4M5Br7fla\_Brenskiella\_flavomicans NCBI  
-XX-CP1Sc3S4M5Pl7PER1\_Plectris\_PER1 NCBI  
-X-XX-CP1Sc3S4M5Ma7703603\_Macroductylus\_703603 NCBI  
-XX-CP1Sc3S4M5Ma7694770\_Macroductylus\_694770 NCBI  
-X-XX-CP1Sc3S4M5Is7Arg1\_Isonychus\_Arg1 NCBI  
-X-CP1Sc3S4M5Is7AGL2012\_Isonychus\_AGL2012 NCBI  
-X-XX-CP1Sc3S4M5Is7Arg2\_Isonychus\_Arg2 NCBI  
-XX-CP1Sc3S4M5Is7670884\_Isonychus\_670884 NCBI  
-XX-CP1Sc3S4M5Is7670885\_Isonychus\_670885 NCBI  
-X-XX-CP1Sc3S4M5Sp7DA2012\_1\_Sparmannia\_DA2012 NCBI  
-X-XX-CP1Sc3S4M5Sp7DA2012\_1\_Sparmannia\_DA2012 NCBI  
-X-XX-CP1Sc3S4M5En7boi\_Enarria\_boissayei NCBI  
-X-XX-CP1Sc3S4M5Che7str\_Cherbezatina\_strigosa NCBI  
-X-XX-CP1Sc3S4M5Api7671495\_Apiencya\_671495 NCBI



--X-----XX---X CP1Sc3S4M5Eu7671497 Euthora\_671497 NCBI  
--X-----XX---X CP1Sc3S4M5Eu7671503 Varenicya\_671503 NCBI  
--X-----XX---X CP1Sc3S4M5Eut7p1l Eutranchesia\_pilosicollis NCBI  
--X-----XX---X CP1Sc3S4M5DA2012\_Melolonthinae\_DA2012 NCBI  
--X-----XX---XXX CP1Sc3S4M5D7exc Idionychus\_excisus NCBI  
--X-----XX---XXX CP1Sc3S4M5Ho7set Holotrichia\_seticollis NCBI  
--X-----XX---XXX CP1Sc3S4M5Phy7BYU Phyllophaga\_BYU\_ACC0040 NCBI  
--X-----XX---XXX CP1Sc3S4M5Phy7JAR2003 Phyllophaga\_JAR2003 NCBI  
--X-----XX---CP1Sc3S4M5So7BM567137I Sophrops\_BM567137I NCBI  
--X-----XX---XXX CP1Sc3S4M5So7DA2006 Sophrops\_DA2006 NCBI  
--X-----XX---X CP1Sc3S4M5Ha7tra Haplidia\_transversa NCBI  
--X-----XX---XXX CP1Sc3S4M5Am7sol Amphimalon\_solstitiale NCBI  
--X-----XX---CP1Sc3S4M5Ho7par Holotrichia\_parallela NCBI  
--X-----XX---CP1Sc3S4M5Ha7BMNH703599 Haplidia\_BMNH703599 NCBI  
--X-----X---CP1Sc3S4M5Ap17tra Aplidia\_transversa NCBI  
--X-----XX---CP1Sc3S4M5Ho7lon Holotrichia\_longipennis NCBI  
--X-----XX---CP1Sc3S4M5Ho7sik Holotrichia\_sikkimensis NCBI  
--X-----XX---CP1Sc3S4M5Ho7nag Holotrichia\_nagpurensis NCBI  
--X-----XX---CP1Sc3S4M5Ho7ser Holotrichia\_serrata NCBI  
--X-----XX---CP1Sc3S4M5Bra7fal Brahmina\_faldermanni NCBI  
--X-----XX---CP1Sc3S4M5Tr7ten Trematodes\_tenebrioides NCBI  
--X-----XX---CP1Sc3S4M5Bra7cre Brahmina\_crenicollis NCBI  
--X-----XX---X CP1Sc3S4M5As7DA2012\_Astenophilis\_DA2012 NCBI  
XXXXXXXXXXXXX CP1Sc3S4M5As7\_Astenophilis\_sp\_JX412755  
--X-----XX---CP1Sc3S4M5Ho7dio Holotrichia\_dionophila NCBI  
--X-----XX---CP1Sc3S4M5Hi7bic Hilyotrogus\_bicoloreus NCBI  
--X-----XX---CP1Sc3S4M5He7pic Heptophylla\_picea NCBI  
--X-----XX---CP1Sc3S4M5Po7dec Polyphylla\_decemlineata NCBI  
--X-----XX---X CP1Sc3S4M5Hop17p1l Hoplocheilus\_piliger NCBI  
--X-----XX---X CP1Sc3S4M5Em7sic Empecta\_sicardi NCBI  
--X-----XX---CP1Sc3S4M5Po7lat Polyphylla\_laticollis NCBI  
--X-----X---X CP1Sc3S4M5Cy7kir Cyphonoxia\_kircheri NCBI  
--X-----XX---X CP1Sc3S4C5Ano7sar Anoxia\_sardoa NCBI  
--X-----XX---X CP1Sc3S4C5Ano7DA2012 Anoxia\_DA2012 NCBI  
--X-----XX---CP1Sc3S4M5Hop17inc Hoplosternus\_incanus NCBI  
--X-----XX---XXX CP1Sc3S4M5Me7mel Melolontha\_melolontha NCBI  
XXXXXXXXXXXXX CP1Sc3S4M5Me7hip Melolontha\_hippocastani.amie.idba.79\_MERGED\_MMG\_ANNOT\_FROM\_BARCODE  
--X-----XX---XXX CP1Sc3S4M5Le7alb Lepidiota\_albistigma NCBI  
--X-----X---X CP1Sc3S4M5Me7MELaus1 Melolontha\_MELaus1 NCBI  
--X-----XX---XXX CP1Sc3S4M5Le7str Lepidiota\_stradbrokensis NCBI  
--X-----XX---X CP1Sc3S4M5DA2012\_1\_Melolonthinae\_DA2012 NCBI  
XXXXXXXXXXXXX X CP1Sc3S4M5Rh7mag Rhopaea\_magnicornis\_NC\_013252\_MERGED  
--X-----XX---X CP1Sc3S4M5Ach7DA2012 Achloa\_DA2012 NCBI  
--X-----X---X CP1Sc3S4M5Rha7DA2012\_Rhabdophilis\_DA2012 NCBI  
--X-----XX---X CP1Sc3S4M5DA2012\_3\_Melolonthinae\_DA2012 NCBI  
--X-----XX---X CP1Sc3S4M5DA2012\_2\_Melolonthinae\_DA2012 NCBI  
--X-----XX---X CP1Sc3S4M5Hy7DA2012\_2\_Hypopholis\_DA2012 NCBI  
--X-----XX---X CP1Sc3S4M5Hy7DA2012\_1\_Hypopholis\_DA2012 NCBI  
--X-----XX---X CP1Sc3S4M5Sch7DA2012\_1\_Schizonycha\_DA2012 NCBI  
XXXXXXXXXXXXX CP1Sc3S4M5Sch7\_Schizonycha\_sp\_JX412739  
--X-----XX---X CP1Sc3S4M5Sch7gra Schizonycha\_gracilis NCBI  
--X-----XX---X CP1Sc3S4M5Sch7pun Schizonycha\_puncticollis NCBI  
--X-----XX---X CP1Sc3S4M5Sch7inc Schizonycha\_increta NCBI  
--X-----XX---X CP1Sc3S4M5Sch7DA2012\_8\_Schizonycha\_DA2012 NCBI  
--X-----XX---X CP1Sc3S4M5Sch7tra Schizonycha\_transvaalica NCBI  
--X-----XX---X CP1Sc3S4M5Sch7lan Schizonycha\_languens NCBI  
--X-----X---X CP1Sc3S4M5Sch7DA2012\_6\_Schizonycha\_DA2012 NCBI  
--X-----XX---X CP1Sc3S4M5Sch7DA2012\_11\_Schizonycha\_DA2012 NCBI  
--X-----XX---X CP1Sc3S4M5Sch7DA2012\_3\_Schizonycha\_DA2012 NCBI  
--X-----XX---X CP1Sc3S4M5Sch7DA2012\_5\_Schizonycha\_DA2012 NCBI  
--X-----XX---X CP1Sc3S4M5Sch7deb Schizonycha\_debilis NCBI  
--X-----XX---X CP1Sc3S4M5Sch7leb Schizonycha\_lebidis NCBI  
--X-----XX---X CP1Sc3S4M5Sch7DA2012\_Schizonycha\_DA2012 NCBI  
--X-----XX---X CP1Sc3S4M5Sch7aff Schizonycha\_affinis NCBI  
--X-----XX---X CP1Sc3S4M5Sch7car Schizonycha\_carbonaria NCBI  
--X-----XX---X CP1Sc3S4M5Sch7dur Schizonycha\_durbana NCBI  
--X-----XX---X CP1Sc3S4M5Sch7DA2012\_15\_Schizonycha\_DA2012 NCBI  
--X-----XX---X CP1Sc3S4M5Sch7DA2012\_9\_Schizonycha\_DA2012 NCBI  
--X-----XX---X CP1Sc3S4M5Sch7glo Schizonycha\_globa NCBI  
--X-----XX---X CP1Sc3S4M5Sch7fal Schizonycha\_fallax NCBI  
--X-----XX---X CP1Sc3S4M5Sch7DA2012\_13\_Schizonycha\_DA2012 NCBI  
--X-----XX---X CP1Sc3S4M5Sch7DA2012\_12\_Schizonycha\_DA2012 NCBI  
--X-----XX---X CP1Sc3S4M5Sch7div Schizonycha\_divulsa NCBI  
--X-----XX---X CP1Sc3S4M5Sch7neg Schizonycha\_neglecta NCBI  
--X-----XX---X CP1Sc3S4M5Sch7abr Schizonycha\_abrupta NCBI  
--X-----XX---X CP1Sc3S4M5Sch7DA2012\_10\_Schizonycha\_DA2012 NCBI  
--X-----XX---X CP1Sc3S4M5Sch7DA2012\_7\_Schizonycha\_DA2012 NCBI  
--X-----XX---X CP1Sc3S4M5Sch7DA2012\_4\_Schizonycha\_DA2012 NCBI  
--X-----XX---X CP1Sc3S4M5Sch7DA2012\_2\_Schizonycha\_DA2012 NCBI  
--X-----XX---XXX CP1Sc3S4M5Sch7fus Schizonycha\_fuscens NCBI  
--X-----XX---X CP1Sc3S4M5Sch7val Schizonycha\_valida NCBI  
--X-----XX---X CP1Sc3S4M5Sch7alg Schizonycha\_algoensis NCBI  
--X-----XX---X CP1Sc3S4M5Sch7liv Schizonycha\_livada NCBI  
--X-----XX---X CP1Sc3S4M5Sch7usa Schizonycha\_usambarae NCBI  
--X-----XX---X CP1Sc3S4M5Sch7pic Schizonycha\_piceonigra NCBI  
--X-----XX---X CP1Sc3S4M5Sch7com Schizonycha\_compacta NCBI  
--X-----XX---X CP1Sc3S4M5Sch7DA2012\_14\_Schizonycha\_DA2012 NCBI  
--X-----XX---X CP1Sc3S4M5Ge7Arg2 Geniates\_Arg2 NCBI  
--X-----XX---X CP1Sc3S4M5Lo7PER1 Lobogeniates\_PER1 NCBI  
--X-----XX---XXX CP1Sc3S4R5747070 Rutelinae\_747070 NCBI  
--X-----XX---CP1Sc3S4R5Pha7spe Phalangogonia\_sperata NCBI  
--X-----XX---CP1Sc3S4R5Ano7boi Anoplognathus\_boisduvalii NCBI  
--X-----XX---CP1Sc3S4R5Sp7cup Spodochlamys\_cupreola NCBI  
--X-----XX---CP1Sc3S4R5Ch7pan Chlorota\_panamensis NCBI  
--X-----XX---X CP1Sc3S4R5Ant7Erc1 Antichaira\_Erc1\_MFR1

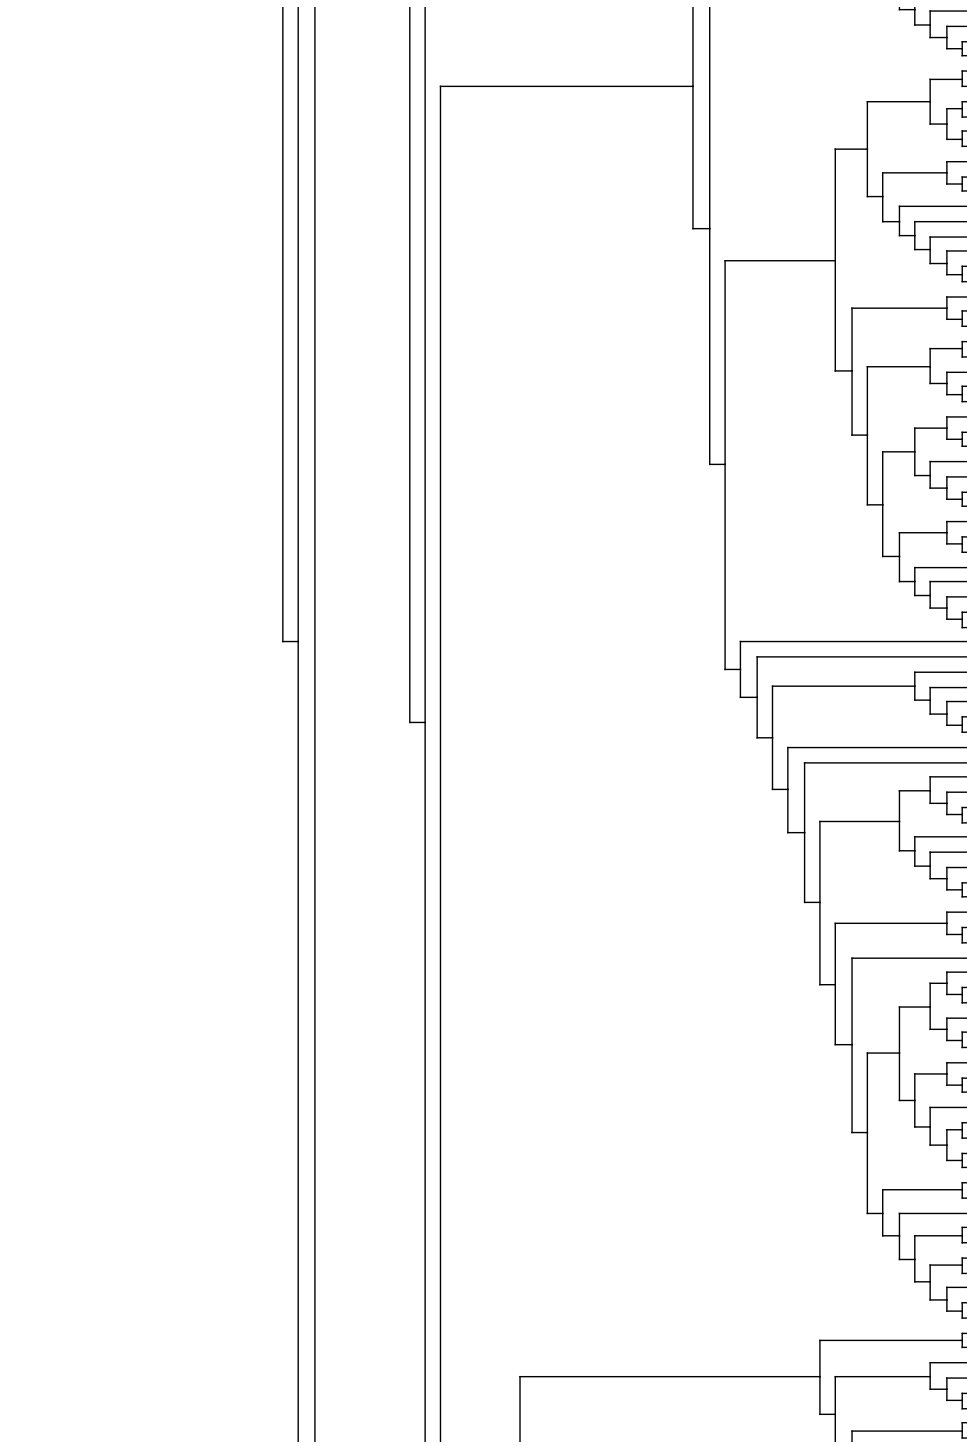

CP1Sc3S4R5Plames Platycyelia mesosternalis NCBI  
CP1Sc3S4R5Pe7PER1 Pelidnota PER1 NCBI  
CP1Sc3S4R5Pe7bel Pelidnota Belti NCBI  
CP1Sc3S4R5Pe7par Pelidnota parallela NCBI  
CP1Sc3S4R5Pe7not Pelidnota notata NCBI  
CP1Sc3S4R5Pe7fro Pelidnota frommeri NCBI  
CP1Sc3S4R5Chr7aur Chrysinina aurigans NCBI  
CP1Sc3S4R5Chr7lim Chrysinina limbata NCBI  
CP1Sc3S4R5Chr7bru Chrysinina bruyaei NCBI  
CP1Sc3S4R5Chr7auro Chrysinina aurora NCBI  
CP1Sc3S4R5Chr7lut Chrysinina luteomarginata NCBI  
CP1Sc3S4R5Pl7H20047 Plusiotis TH20047 NCBI  
CP1Sc3S4R5Is7Las Isoptilia lasiosoma NCBI  
CP1Sc3S4R5Ad7JFM2002 Adoretus JFM2002 NCBI  
CP1Sc3S4R5Pr7fru Prodoxotus truncatus NCBI  
CP1Sc3S4R5Ad7DA2006\_1 Adoretus DA2006 NCBI  
CP1Sc3S4R5Ad7 Adoretus sp\_JX412788  
CP1Sc3S4R5Ad7DA2006 Adoretus DA2006 NCBI  
CP1Sc3S4R5Ad7BM677785 Adoretus BM677785 NCBI  
CP1Sc3S4R5Ad7BM677767 Adoretus BM677767 NCBI  
CP1Sc3S4R5Ad7BM670852 Adoretus BM670852 NCBI  
CP1Sc3S4R5Ad7ver Adoretus versutus NCBI  
CP1Sc3S4R5Ad7las Adoretus lasiopygus NCBI  
CP1Sc3S4R5Ad7DA2006\_2 Adoretus DA2006 NCBI  
CP1Sc3S4R5Ad7BM677810 Adoretus BM677810 NCBI  
CP1Sc3S4R5Ad7BM677766 Adoretus BM677766 NCBI  
CP1Sc3S4R5Le7ova Lepadoretus ovatooides NCBI  
CP1Sc3S4R5Tr7muc Trigonostomum mucoreum NCBI  
CP1Sc3S4R5671443 Rutelinae 671443 NCBI  
CP1Sc3S4R5671419 Rutelinae 671419 NCBI  
CP1Sc3S4R5Ad7ten Adoretus tenuimaculatus NCBI  
CP1Sc3S4M5Pe747068 Perissosoma 747068 NCBI  
CP1Sc3S4D5PHI Dynastinae PHI NCBI  
CP1Sc3S4D5Ch7lat Cheiloplatys latipes NCBI  
CP1Sc3S4D5Or7clu Orizabus clunalis NCBI  
CP1Sc3S4D5Cy7car Cyclocephala carbonaria NCBI  
CP1Sc3S4D5Cy7kas Cyclocephala kaszabi NCBI  
CP1Sc3S4D5Cy7por Cyclocephala porioni NCBI  
CP1Sc3S4D5Cy7wei Cyclocephala weidneri NCBI  
CP1Sc3S4D5To7sal Tomarus sallaei NCBI  
CP1Sc3S4D5Pu7cas Pucaya castanea NCBI  
CP1Sc3S4D5Cy7nigF Cyclocephala nigritarsis NCBI  
CP1Sc3S4D5Par7ama Parapucaya amazonica NCBI  
CP1Sc3S4D5Cy7a1m Cyclocephala almitana NCBI  
CP1Sc3S4D5Cy7mel Cyclocephala melanocephala NCBI  
CP1Sc3S4D5An7vex Ancognatha vexans NCBI  
CP1Sc3S4D5Cy7nig Cyclocephala nigerima NCBI  
CP1Sc3S4D5Cy7maf Cyclocephala mafaffa NCBI  
CP1Sc3S4D5Cy7spa Cyclocephala sparsa NCBI  
CP1Sc3S4D5Cy7cons Cyclocephala conspicua NCBI  
CP1Sc3S4D5Cy7amb Cyclocephala amblyopsis NCBI  
CP1Sc3S4D5Cy7zod Cyclocephala zodion NCBI  
CP1Sc3S4D5Cy7bre Cyclocephala brevis NCBI  
CP1Sc3S4D5Cy7gra Cyclocephala gravis NCBI  
CP1Sc3S4D5Dys7dub Dyscinetus dubius NCBI  
CP1Sc3S4D5St7lae Stenocrates laevicollis NCBI  
CP1Sc3S4D5Cy7lig Cyclocephala ligyrina NCBI  
CP1Sc3S4D5Cy7lun Cyclocephala lunulata NCBI  
CP1Sc3S4D5Cy7Arg2 Cyclocephala Arg2 NCBI  
CP1Sc3S4D5Cy7con Cyclocephala confusa NCBI  
CP1Sc3S4D5Cy7ero Cyclocephala erotylina NCBI  
CP1Sc3S4D5Cy7sto Cyclocephala stockwelli NCBI  
CP1Sc3S4D5As7sin Aspidolea singularis NCBI  
CP1Sc3S4D5Cy7sti Cyclocephala stictica NCBI  
CP1Sc3S4D5Cy7san Cyclocephala sanguinicollis NCBI  
CP1Sc3S4D5Cy7JMR2012 Cyclocephala JMR2012 NCBI  
CP1Sc3S4D5Cy7670887 Cyclocephala 670887 NCBI  
CP1Sc3S4D5Cy7Arg1 Cyclocephala Arg1 NCBI  
CP1Sc3S4D5Ha7bar Haploscapanes barbarossa NCBI  
CP1Sc3S4D5Cha7atl Chalcosoma atlantis NCBI  
CP1Sc3S4D5Cha7cau Chalcosoma caucasicum NCBI  
CP1Sc3S4D5Eu7bir Eupatorus birmanicus NCBI  
CP1Sc3S4D5Pa7sol Pachyoryctes solidus NCBI  
CP1Sc3S4D5Be7bec Beckius beccarii NCBI  
CP1Sc3S4D5Al7pfe Allomyrina pfeifferi NCBI  
CP1Sc3S4D5Xyl7aus Xylotrupes australicus NCBI  
CP1Sc3S4D5Xyl7mer Xylotrupes meridionalis NCBI  
CP1Sc3S4D5Al7dav Allomyrina davidis NCBI  
CP1Sc3S4D5Tr7dic Trypoxylus dichotomus NCBI  
CP1Sc3S4D5Te7DA2012 Temnorhynchus DA2012 NCBI  
CP1Sc3S4D5Pe7idi Pentodon idiota NCBI  
CP1Sc3S4R5He7ara Heteronychus arator NCBI  
CP1Sc3S4D5Pi7dub Pimelopus dubius NCBI  
CP1Sc3S4R5He7DA2012\_1 Heteronychus DA2012 NCBI  
CP1Sc3S4R5Pl7PLU Plusiotis PLUSrent NCBI  
CP1Sc3S4R5He7Het Heteronychus HeteroRent NCBI  
CP1Sc3S4R5He7DA2012 Heteronychus DA2012 NCBI  
CP1Sc3S4D5Al7sim Alissonotum simile NCBI  
CP1Sc3S4R5He7DA2006 Heteronychus DA2006 NCBI  
CP1Sc3S4R5He7Lio Heteronychus lioderes NCBI  
CP1Sc3S4D5En7pan Enema pan NCBI  
CP1Sc3S4D5Meg7sep Megaceras septentrionis NCBI  
CP1Sc3S4D5Am7cen Amblyoproctus centroamericanus NCBI  
CP1Sc3S4D5Al7bin Alissonotum binodulum NCBI  
CP1Sc3S4D5Dy7tit Dynastes titus NCBI

---X-----XX-XXX\_CP1Sc3S4D5Dy7gra\_Dynastes\_granti\_NCBI  
---X-----XX----CP1Sc3S4D5Me7the\_Megasoma\_thersites\_NCBI  
---X-----XX----CP1Sc3S4D5Me7act\_Megasoma\_actaeon\_NCBI  
---X-----XX----CP1Sc3S4D5Het7mni\_Heterogomphus\_mniszechi\_NCBI  
---X-----XX----CP1Sc3S4D5Sp7bel\_Spodistes\_beltianus\_NCBI  
---X-----XX----CP1Sc3S4D5Go7cla\_Golofa\_clavigera\_NCBI  
---X-----XX----CP1Sc3S4D5Go7piz\_Golofa\_pizarro\_NCBI  
---X-----XX----CP1Sc3S4D5Go7por\_Golofa\_porteri\_NCBI  
---X-----XX---X\_CP1Sc3S4D5DA2012\_Dynastinae\_DA2012\_NCBI  
---X-----XX---X\_CP1Sc3S4D5Sy7syr\_Syrictes\_syrichthus\_NCBI  
---X-----XX-XXX\_CP1Sc3S4D5Ph7dio\_Phyllognathus\_dionysius\_NCBI  
---X-----XX-XXX\_CP1Sc3S4D5Pe7alg\_Pentodon\_algerinum\_NCBI  
---X-----XX----CP1Sc3S4D5Au7cen\_Augosoma\_centaurus\_NCBI  
---X-----XX---X\_CP1Sc3S4D5Xy7gid\_Xyloryctes\_gideon\_NCBI  
---X-----XX---X\_CP1Sc3S4D5Py7DA2012\_Pycnoschema\_DA2012\_NCBI  
---X-----XX---X\_CP1Sc3S4D5Or7DA2012\_1\_Oryctes\_DA2012\_NCBI  
---XX-----XX-XXX\_CP1Sc3S4D5Or7nas\_Oryctes\_nasicornis\_NCBI  
---X-----XX---X\_CP1Sc3S4D5Or7DA2012\_Oryctes\_DA2012\_NCBI  
XXXXXXXXXX-XX---X\_CP1Sc3S4D5Cyp7val\_Cyphonistes\_vallatus\_JX412731\_MERGED  
---XX-----XX----CP1Sc3S4D5Ho7qua\_Homophileurus\_quadrituberculatus\_NCBI  
---XX-----XX----CP1Sc3S4D5He7dys\_Hemiphileurus\_dyscritus\_NCBI  
---XX-----XX----CP1Sc3S4D5He7var\_Hemiphileurus\_variolosus\_NCBI  
---X-----XX----CP1Sc3S4D5Ph17you\_Phileurus\_youngi\_NCBI  
---X-----XX----CP1Sc3S4D5Ph17did\_Phileurus\_didymus\_NCBI  
XXXXXXXXXX-XX----CP1Sc3S4R5P7\_Popillia\_sp\_JX412777  
XXXXXXXX-XX-XXX\_CP1Sc3S4R5Ph7for\_Phyllopertha\_horticola\_ame.idba.189\_MERGED\_MMG\_ANNOT\_FROM\_BARCODE  
---X-----XX-XX-CP1Sc3S4R5Po7iap\_Popillia\_japonica\_NCBI  
---X-----XX---X\_CP1Sc3S4R5An7BM677813\_Anomala\_BM677813\_NCBI  
---X-----XX---X\_CP1Sc3S4R5An7BM677815\_Anomala\_BM677815\_NCBI  
---X-----XX---X\_CP1Sc3S4R5An7BM677802\_Anomala\_BM677802\_NCBI  
---X-----XX---X\_CP1Sc3S4R5An7BM677797\_Anomala\_BM677797\_NCBI  
---X-----XX---X\_CP1Sc3S4R5An7BM677799\_Anomala\_BM677799\_NCBI  
---X-----XX---X\_CP1Sc3S4R5An7dor\_Anomala\_dorsalis\_NCBI  
---X-----XX---X\_CP1Sc3S4R5An7vari\_Anomala\_variegata\_NCBI  
---XX-----XX-XXX\_CP1Sc3S4R5Mi7sil\_Mimela\_siliguria\_NCBI  
---X-----XX---X\_CP1Sc3S4R5An7var\_Anomala\_varicolor\_NCBI  
---XX-----XX---X\_CP1Sc3S4R5An7ben\_Anomala\_bengalensis\_NCBI  
---X-----XX---X\_CP1Sc3S4R5An7bil\_Anomala\_bilobata\_NCBI  
---X-----XX---X\_CP1Sc3S4R5An7pol\_Anomala\_polita\_NCBI  
---X-----XX---X\_CP1Sc3S4R5An7aul\_Anomala\_aulax\_NCBI  
---XX-----XX-X-CP1Sc3S4R5An7luc\_Anomala\_luculenta\_NCBI  
---X-----XX-XX-CP1Sc3S4R5An7dub\_Anomala\_dubia\_NCBI  
---X-----XX-XXX\_CP1Sc3S4R5An7dis\_Anisoplia\_dispar\_NCBI  
---XX-----XX-CP1Sc3S4R5Ho7con\_Holotrichia\_consequinea\_NCBI  
---X-----X---X\_CP1Sc3S4R5Bl7671502\_Bliptopertha\_671502\_NCBI  
---X-----XX---X\_CP1Sc3S4R5An7pra\_Anomala\_praetensis\_NCBI  
---XX-----XX---X\_CP1Sc3S4R5Ca7AGL2012\_Callistethus\_AGL2012\_NCBI  
---X-----XX---X\_CP1Sc3S4R5An7BM677876\_Anomala\_BM677876\_NCBI  
---XX-----X-X-CP1Sc3S4R5An7alb\_Anomala\_albopilosa\_NCBI  
---XX-----XX---X\_CP1Sc3S4R5An7dim\_Anomala\_dimidiata\_NCBI  
---X-----XX---X\_CP1Sc3S4R5An7BM671387\_Anomala\_BM671387\_NCBI  
---X-----XX---X\_CP1Sc3S4R5An7BM670922\_Anomala\_BM670922\_NCBI  
---X-----XX---X\_CP1Sc3S4R5An7xan\_Anomala\_xanthoptera\_NCBI  
---X-----XX---X\_CP1Sc3S4R5An7can\_Anomala\_cantori\_NCBI  
---X-----XX---X\_CP1Sc3S4R5An7cha\_Anomala\_chamaeleon\_NCBI  
---XX-----X-X-CP1Sc3S4R5An7cup\_Anomala\_cuprea\_NCBI  
---X-----XX---X\_CP1Sc3S4R5An7mon\_Anomala\_mongolica\_NCBI  
---XX-----XX-CP1Sc3L4Lu5Lu7swi\_Lucanus\_swinhoei\_NCBI  
---XX-----XX-CP1Sc3L4Lu5Lu7dat\_Lucanus\_datunensis\_NCBI  
---XX-----XX-CP1Sc3L4Lu5Lu7fort\_Lucanus\_fortunei\_NCBI  
---XX-----XX-CP1Sc3L4Lu5Lu7oga\_Lucanus\_ogakii\_NCBI  
---XX-----XX-CP1Sc3L4Lu5Lu7kur\_Lucanus\_kurosawai\_NCBI  
---XX-----XX-CP1Sc3L4Lu5Lu7kan\_Lucanus\_kanoi\_NCBI  
---XX-----XX-CP1Sc3L4Lu5Lu7mac\_Lucanus\_maculifemoratus\_NCBI  
---X-----XX---X\_CP1Sc3S4R5An7bih\_Anomala\_biharensis\_NCBI  
---X-----XX---X\_CP1Sc3S4R5An7DA2006\_1\_Anomala\_DA2006\_NCBI  
---X-----XX-XXX\_CP1Sc3S4M5Sch7Sch\_Schizonycha\_SchyzRent\_NCBI  
---XX-----XX---X\_CP1Sc3S4R5An7BM677754\_Anomala\_BM677754\_NCBI  
---X-----XX---X\_CP1Sc3S4R5An7DA2006\_Anomala\_DA2006\_NCBI  
---XX-----XX---X\_CP1Sc3S4R5An7BM670851\_Anomala\_BM670851\_NCBI  
---X-----XX---X\_CP1Sc3S4R5An7AGL2012\_2\_Anomala\_AGL2012\_NCBI  
---X-----XX---X\_CP1Sc3S4R5An7val\_Anomala\_valida\_NCBI  
---X-----XX---X\_CP1Sc3S4R5An7meg\_Anomala\_megalia\_NCBI  
---XX-----XX---X\_CP1Sc3S4R5An7cupr\_Anomala\_cupricollis\_NCBI  
---X-----XX---X\_CP1Sc3S4R5Ca7VF2014\_2\_Callistethus\_VF2014\_NCBI  
---X-----XX---X\_CP1Sc3S4R5An7309\_Anomala\_309\_NCBI  
---XX-----XX-CP1Sc3S4R5An7AGL2012\_6\_Anomala\_AGL2012\_NCBI  
---X-----XX-CP1Sc3S4R5An7AGL2012\_3\_Anomala\_AGL2012\_NCBI  
---X-----XX-X-CP1Sc3S4R5Anom7tur\_Anomalorhina\_turrialbana\_NCBI  
---X-----XX-CP1Sc3S4R5An7chal\_Anomala\_chapini\_NCBI  
---XX-----XX-X\_CP1Sc3S4R5An7cal\_Anomala\_caligrapha\_NCBI  
---X-----XX---X\_CP1Sc3S4R5Ca7VF2014\_9\_Callistethus\_VF2014\_NCBI  
---X-----XX---X\_CP1Sc3S4R5Ex7pal\_Exomala\_pallidipennis\_NCBI  
---XX-----XX---X\_CP1Sc3S4R5An7euc\_Anomala\_eucoma\_NCBI  
---XX-----XX---X\_CP1Sc3S4R5St7AGL2012\_Strigoderma\_AGL2012\_NCBI  
---X-----XX---X\_CP1Sc3S4R5Ca7VF2014\_6\_Callistethus\_VF2014\_NCBI  
---X-----XX---X\_CP1Sc3S4R5An7bal\_Anomala\_balzapambae\_NCBI  
---X-----XX---X\_CP1Sc3S4R5An7tra\_Anomala\_trapezifera\_NCBI  
---XX-----XX---X\_CP1Sc3S4R5An7AGL2012\_1\_Anomala\_AGL2012\_NCBI  
---X-----XX---X\_CP1Sc3S4R5An7206\_Anomala\_206\_NCBI  
---XX-----XX-CP1Sc3S4R5An7AGL2012\_4\_Anomala\_AGL2012\_NCBI  
---X-----XX-X\_CP1Sc3S4R5An7dis\_Anomala\_discoidalis\_NCBI  
---X-----XX-CP1Sc3S4R5An7prae\_Anomala\_praecellens\_NCBI  
---X-----XX---X\_CP1Sc3S4R5Ca7VF2014\_8\_Callistethus\_VF2014\_NCBI  
---X-----XX---X\_CP1Sc3S4R5Ca7VF2014\_3\_Callistethus\_VF2014\_NCBI  
---XX-----XX-CP1Sc3S4R5Ca7VF2014\_7\_Callistethus\_VF2014\_MFBT

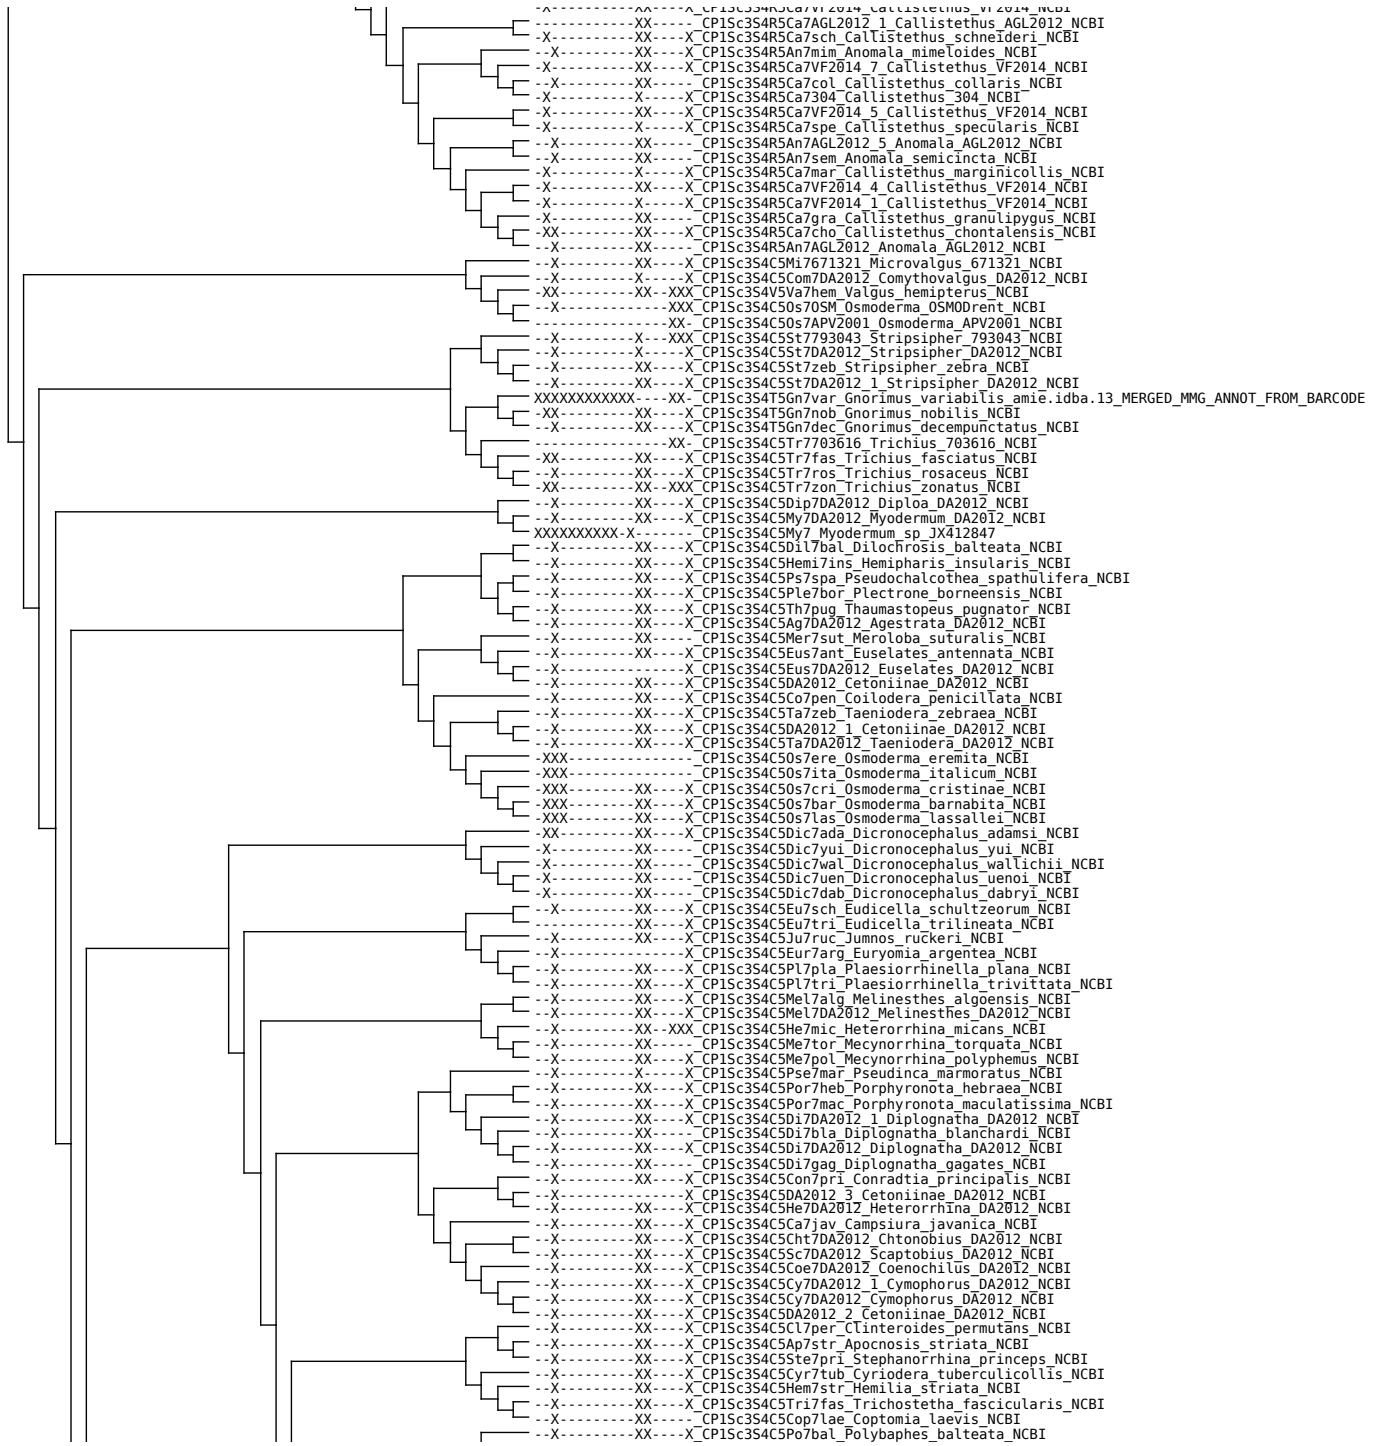

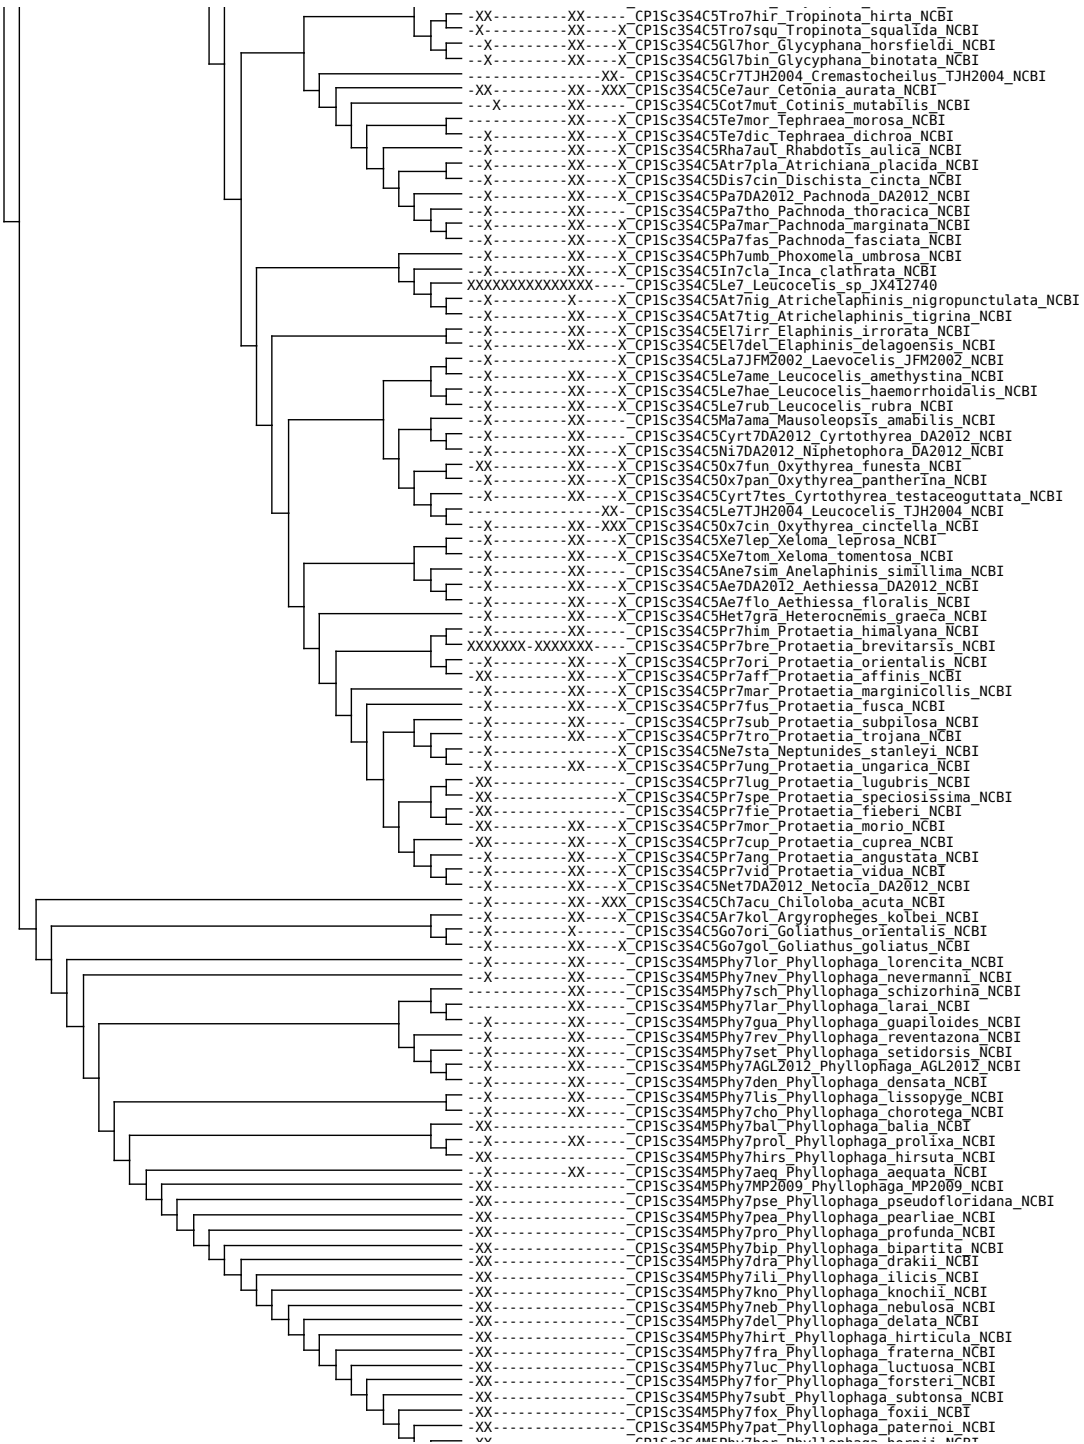

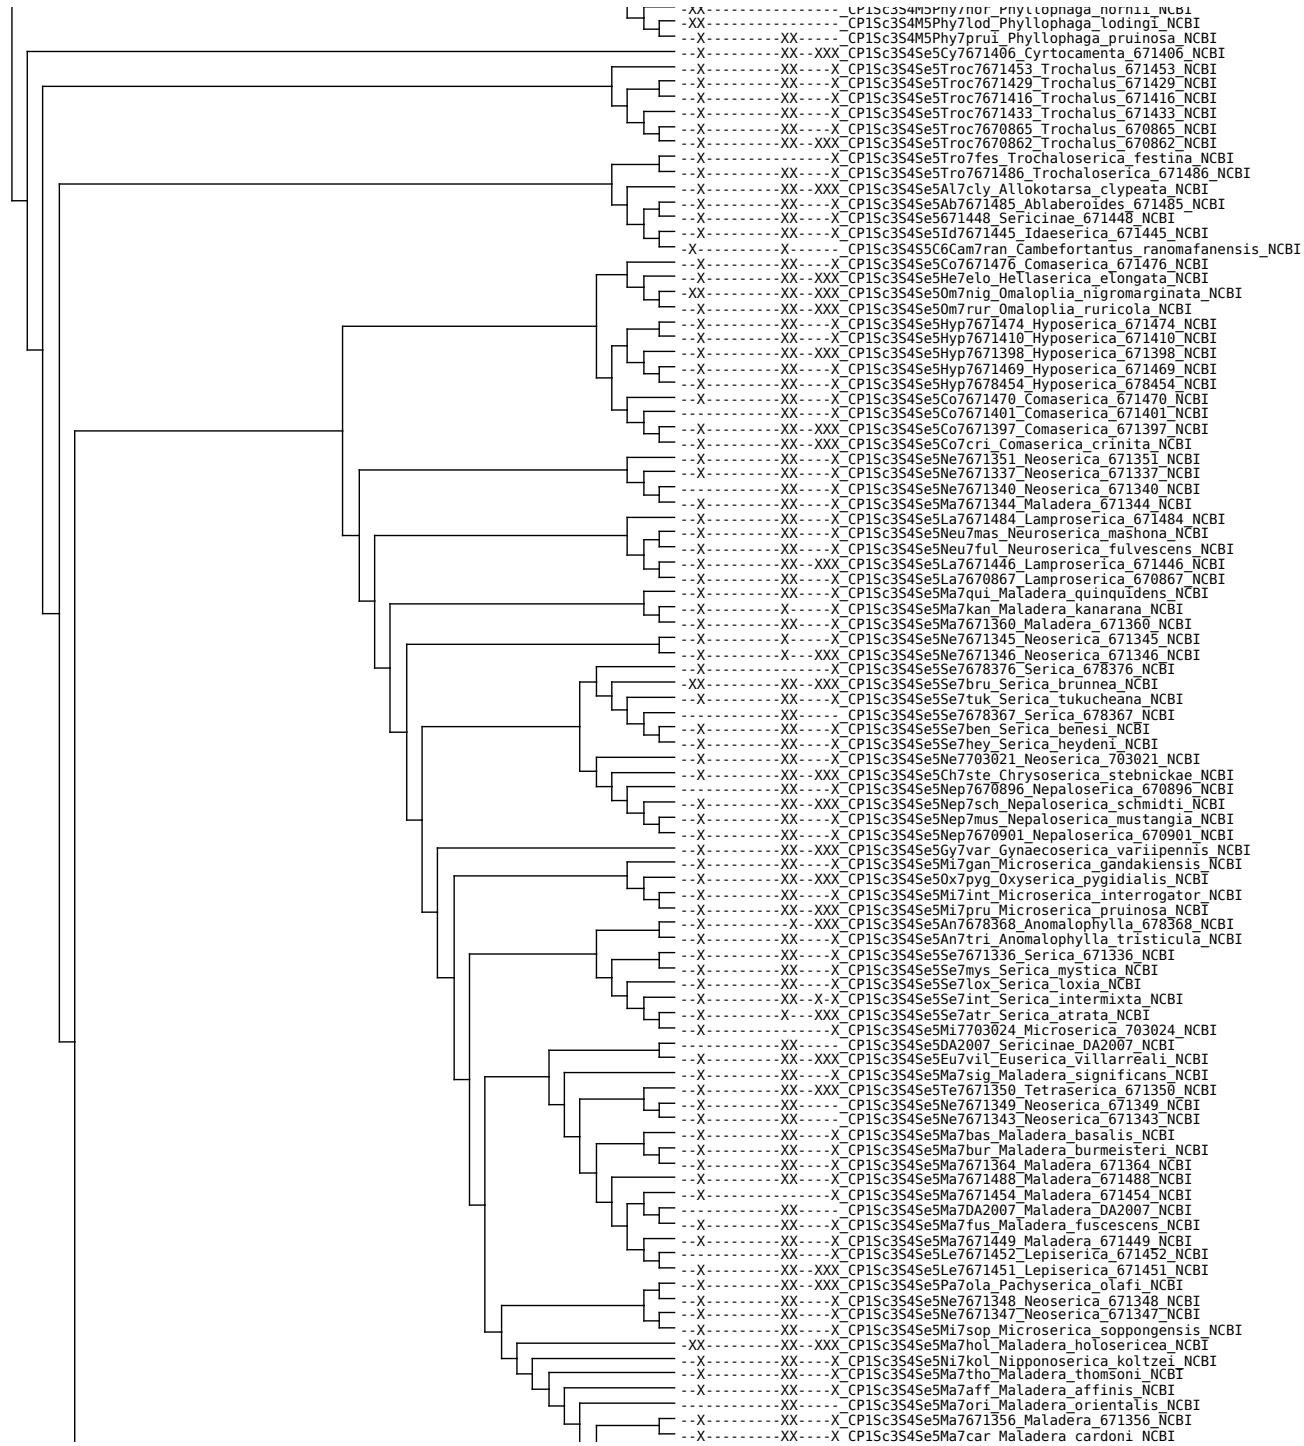

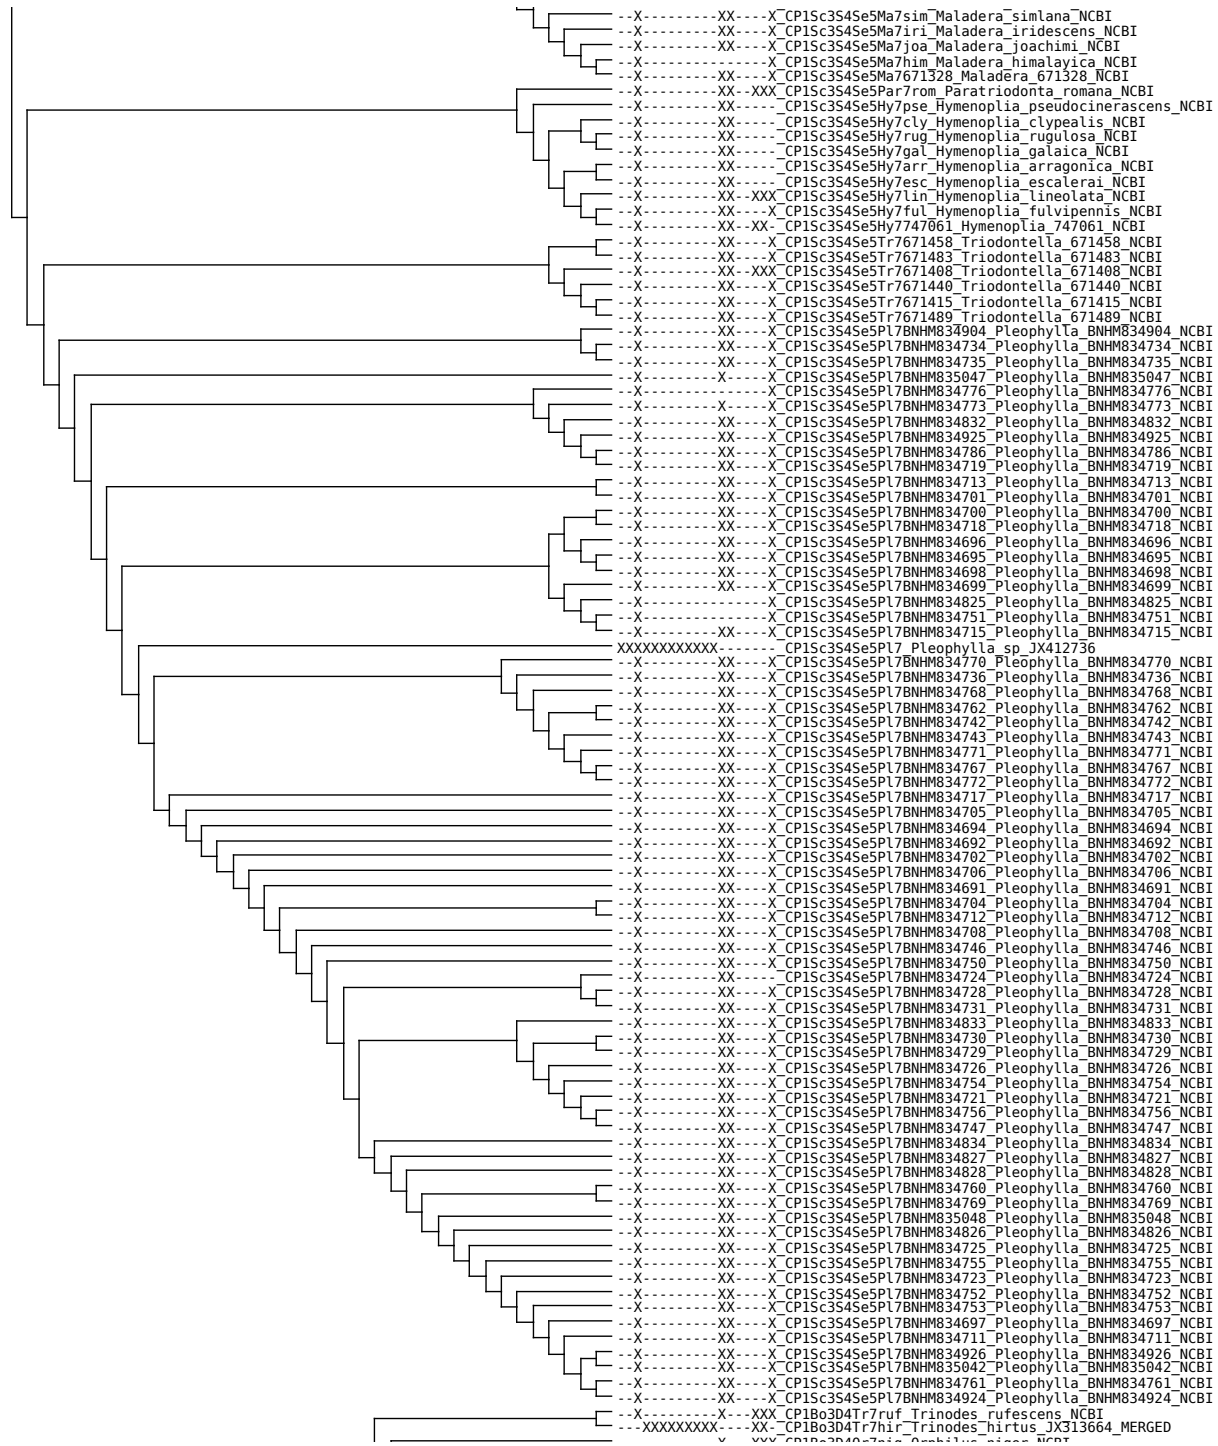

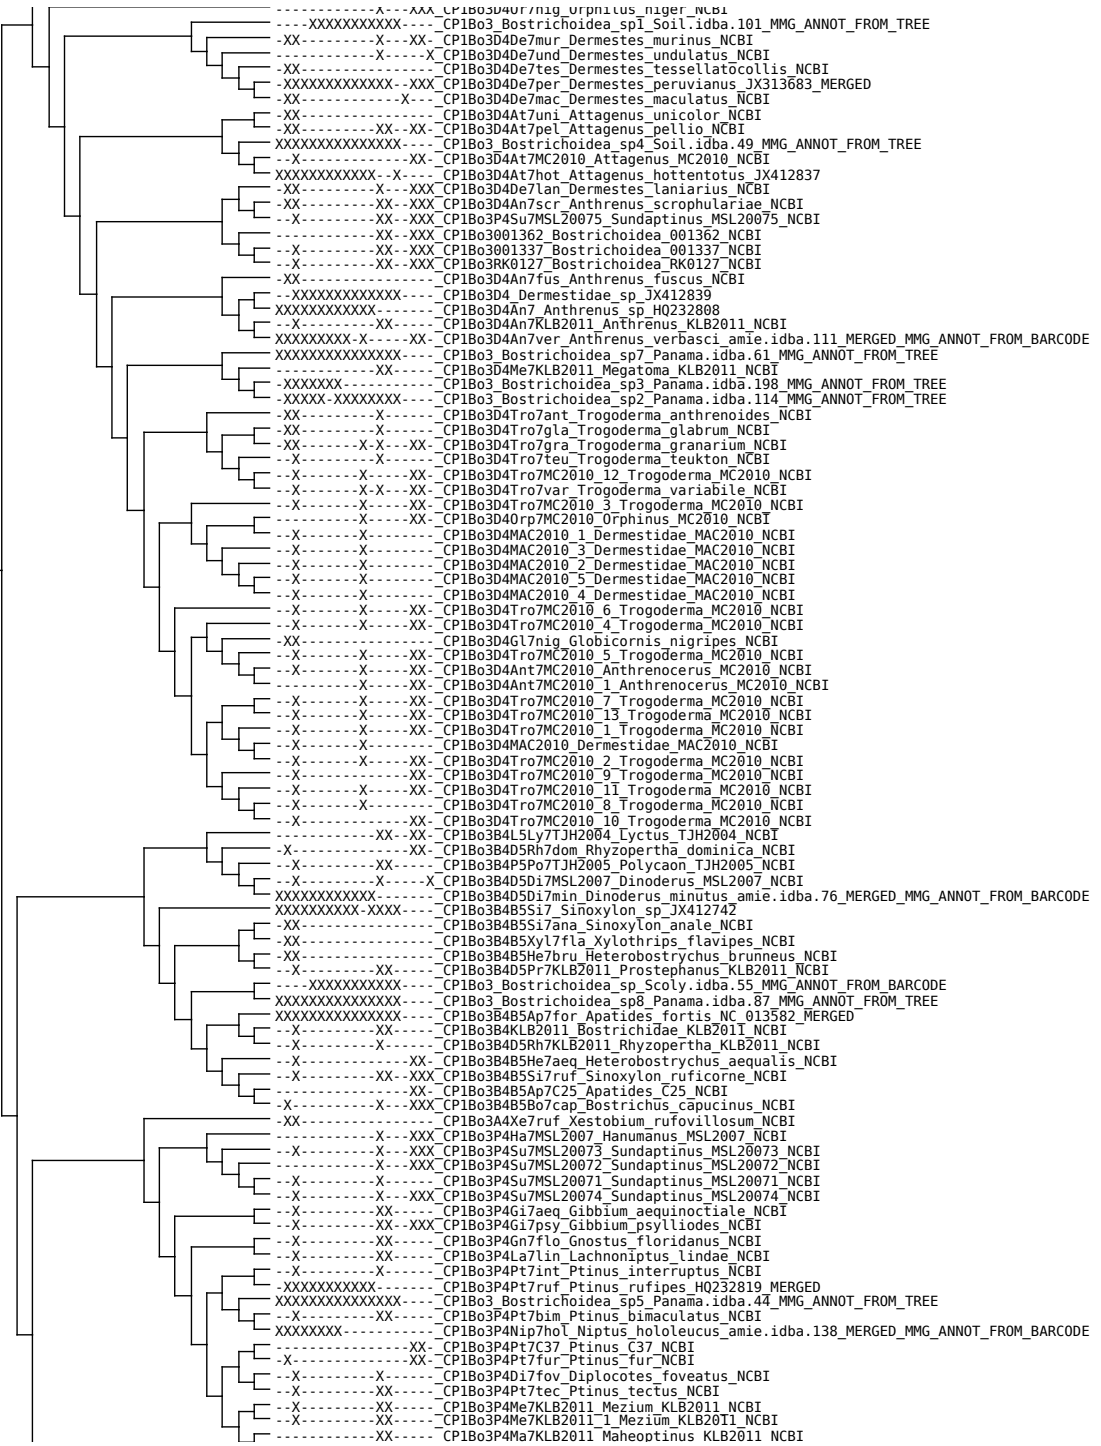



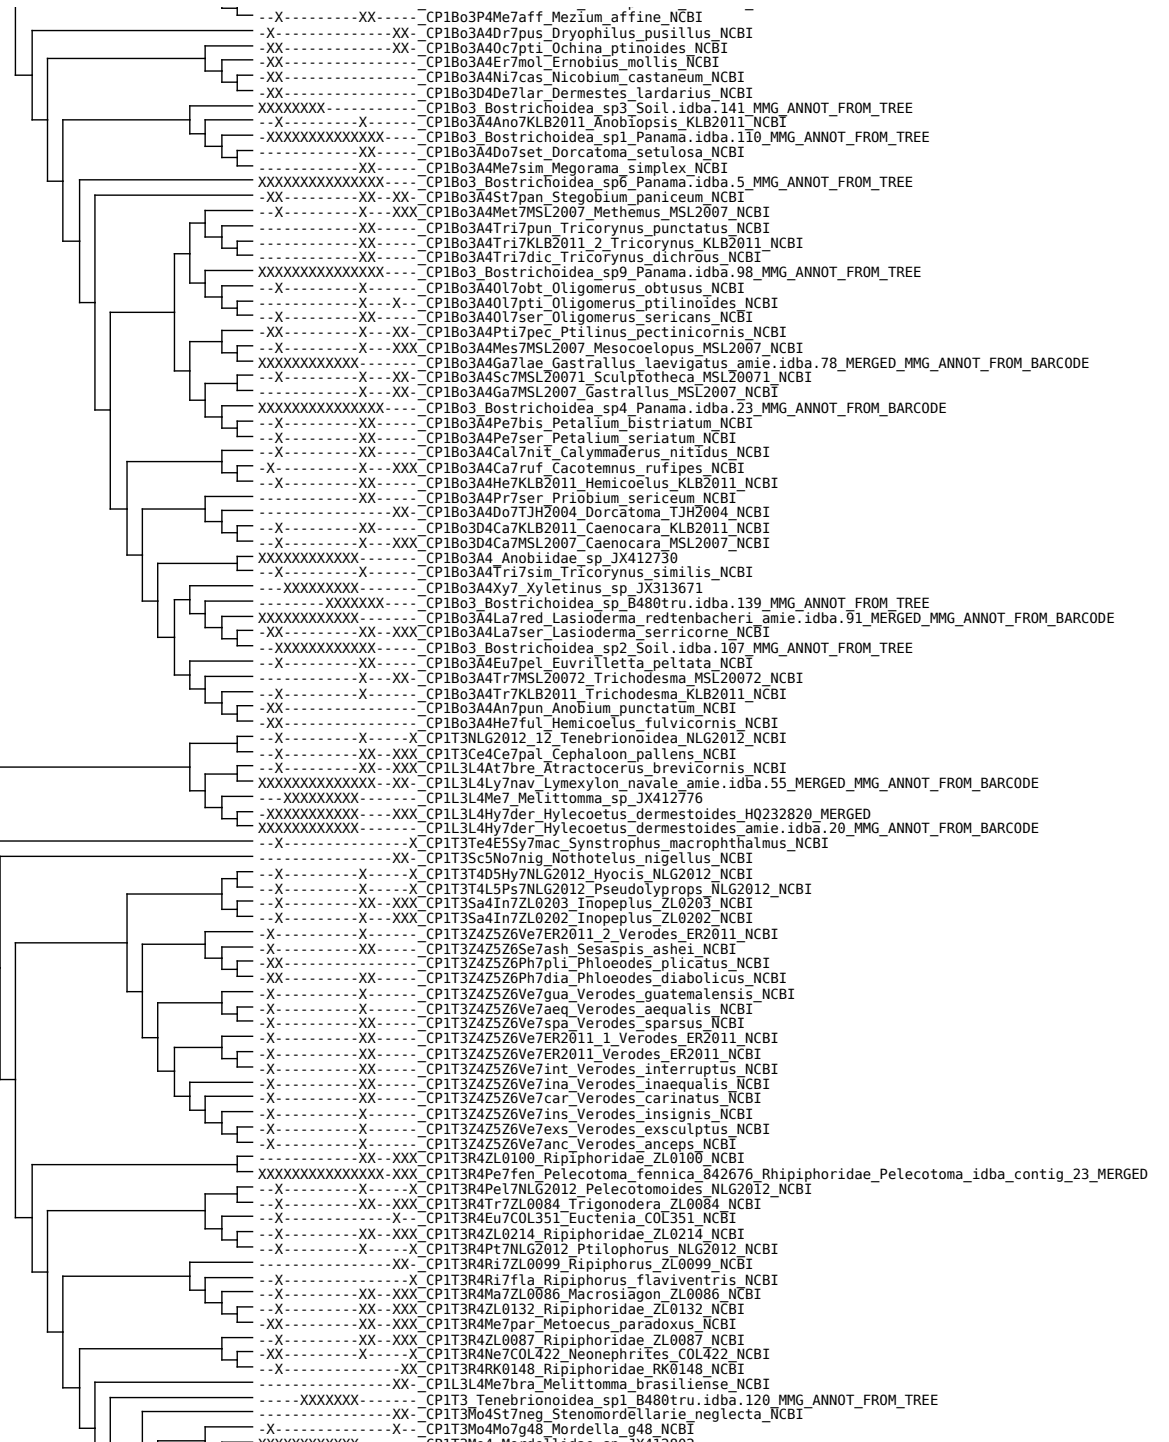

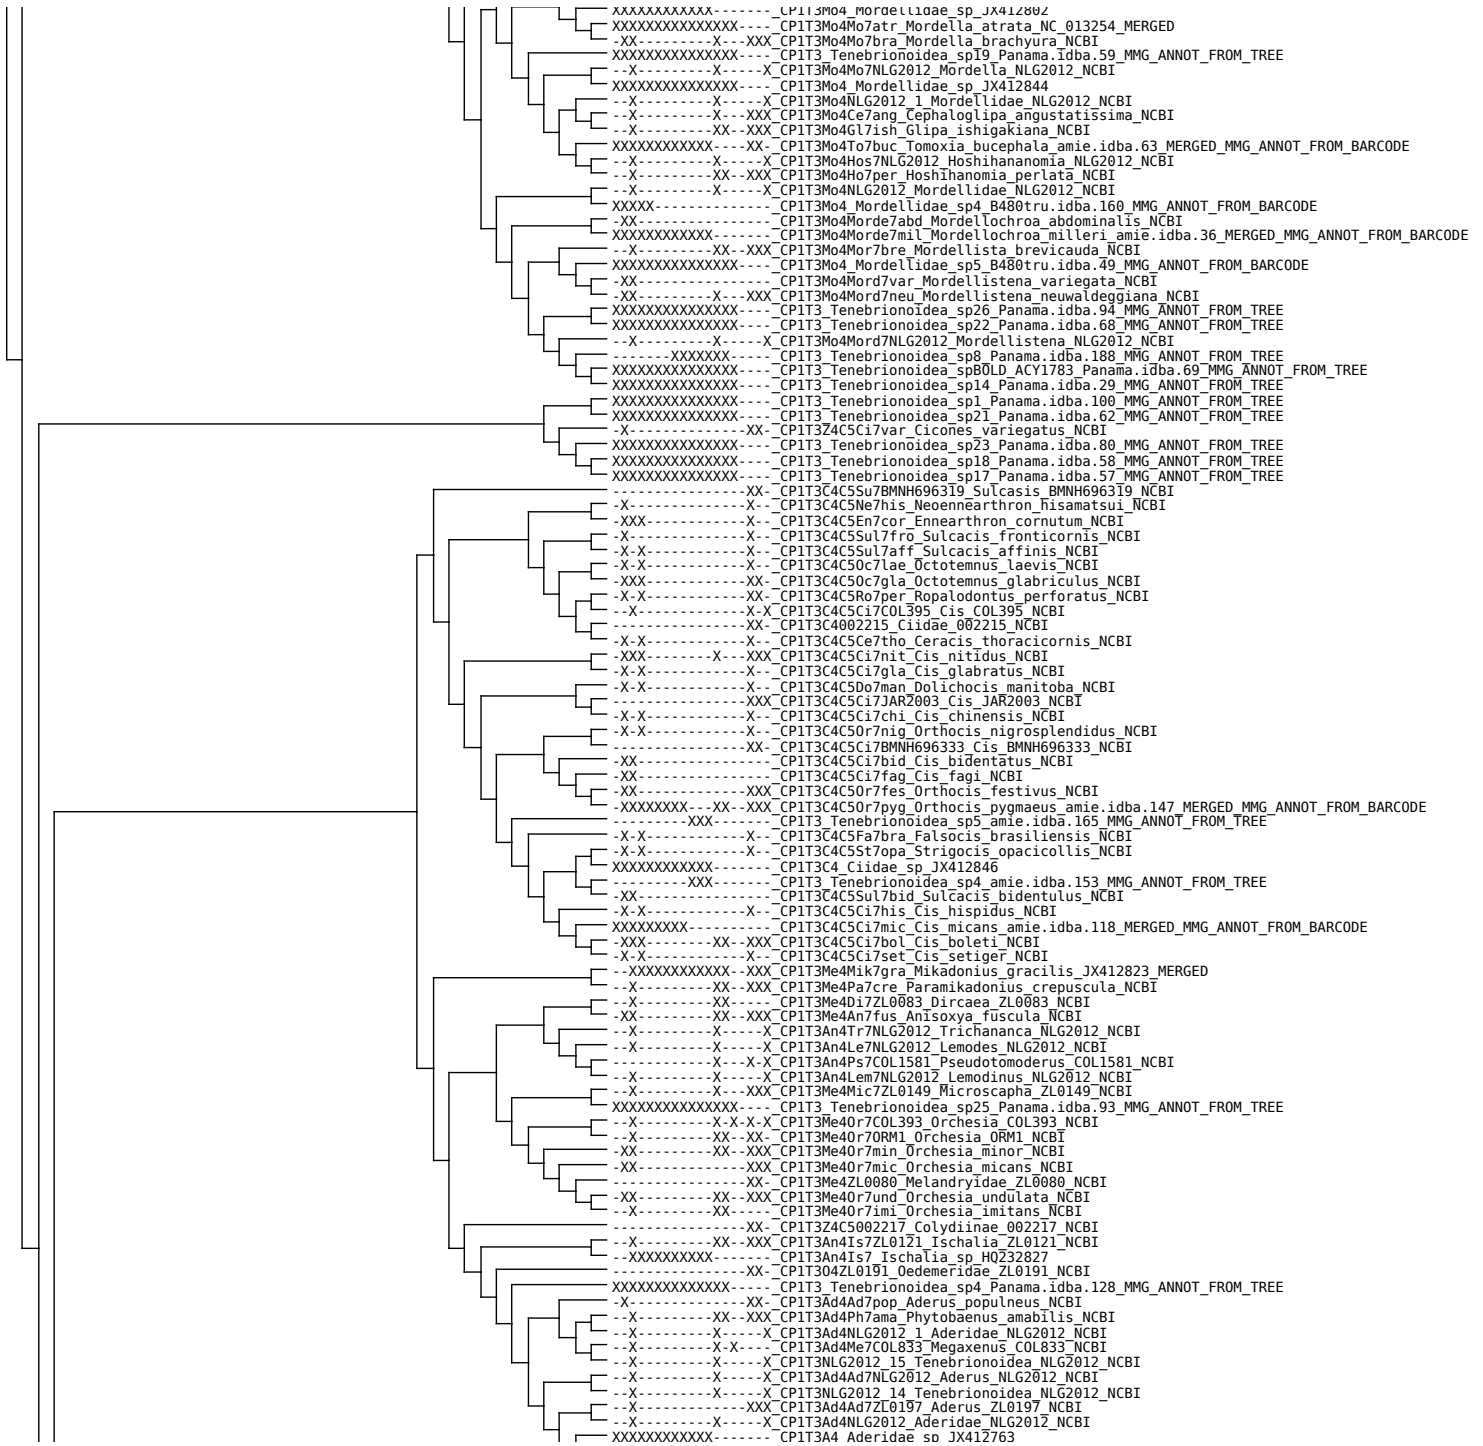

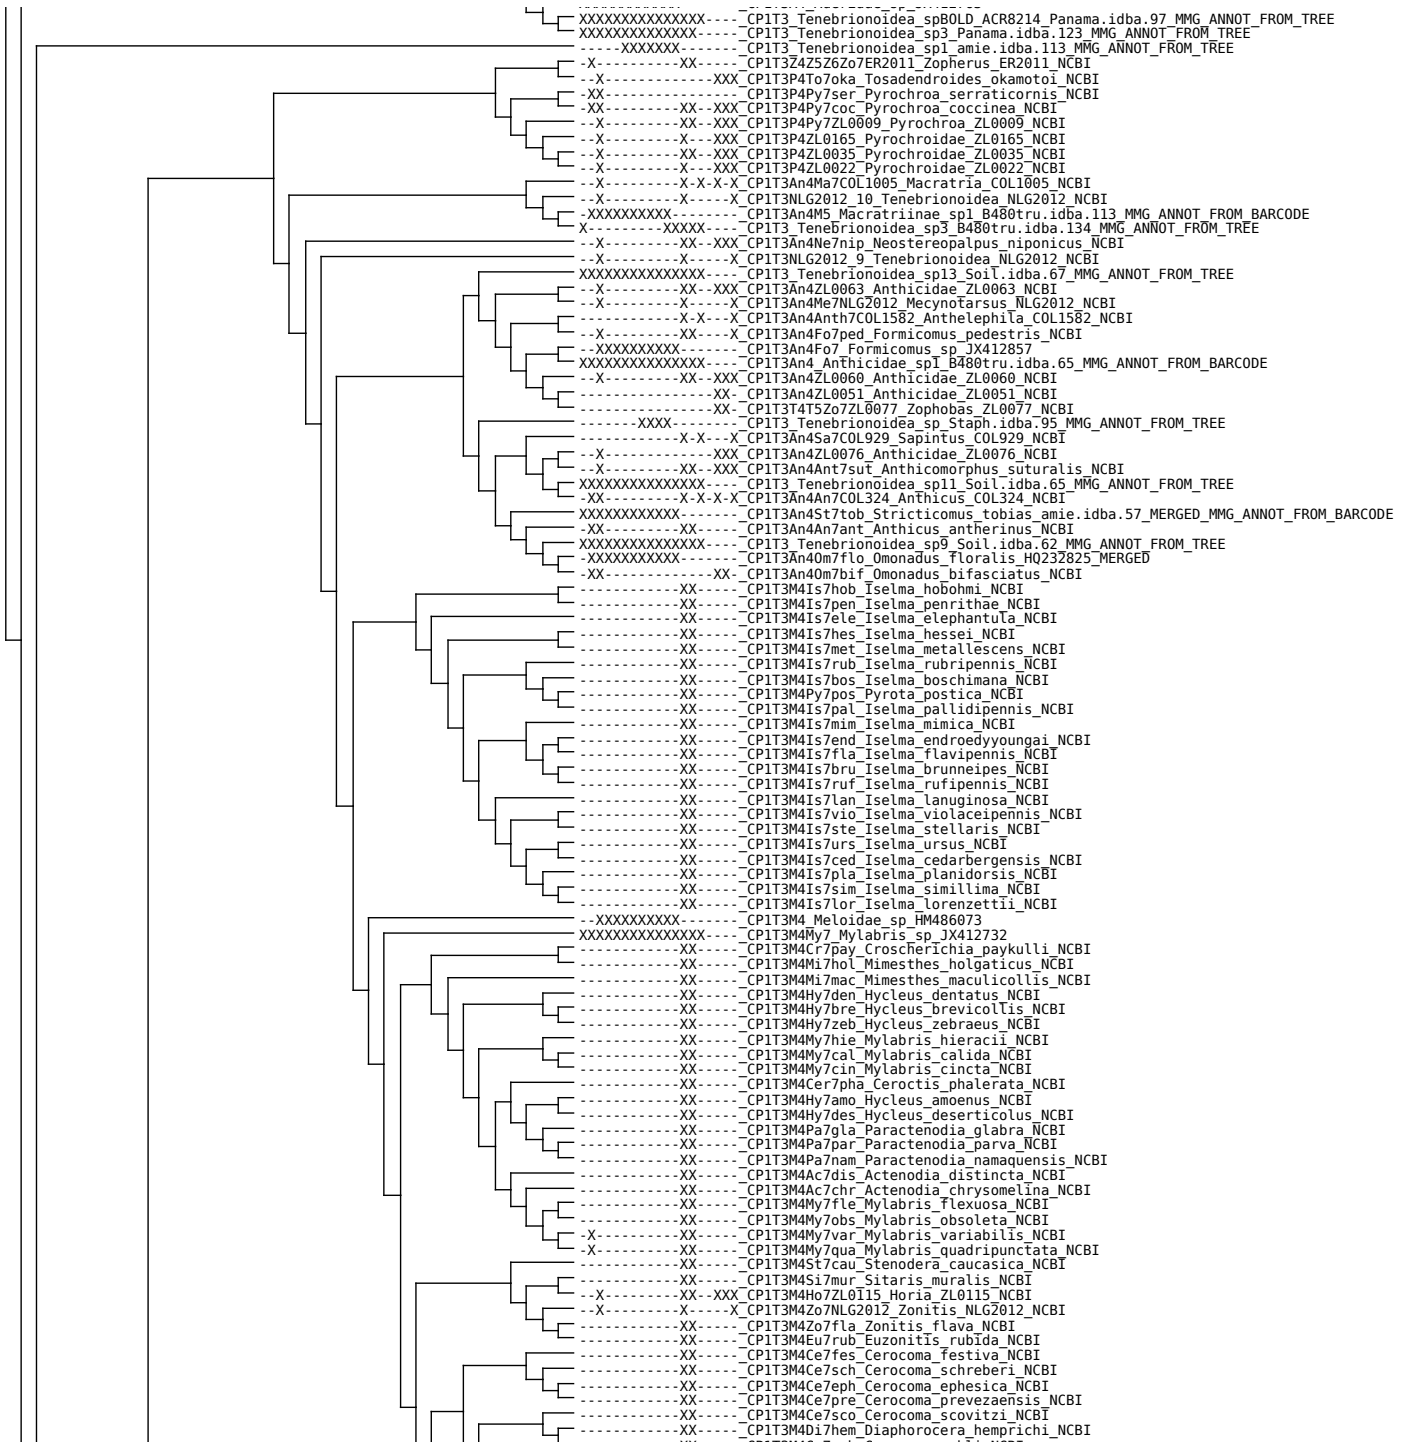

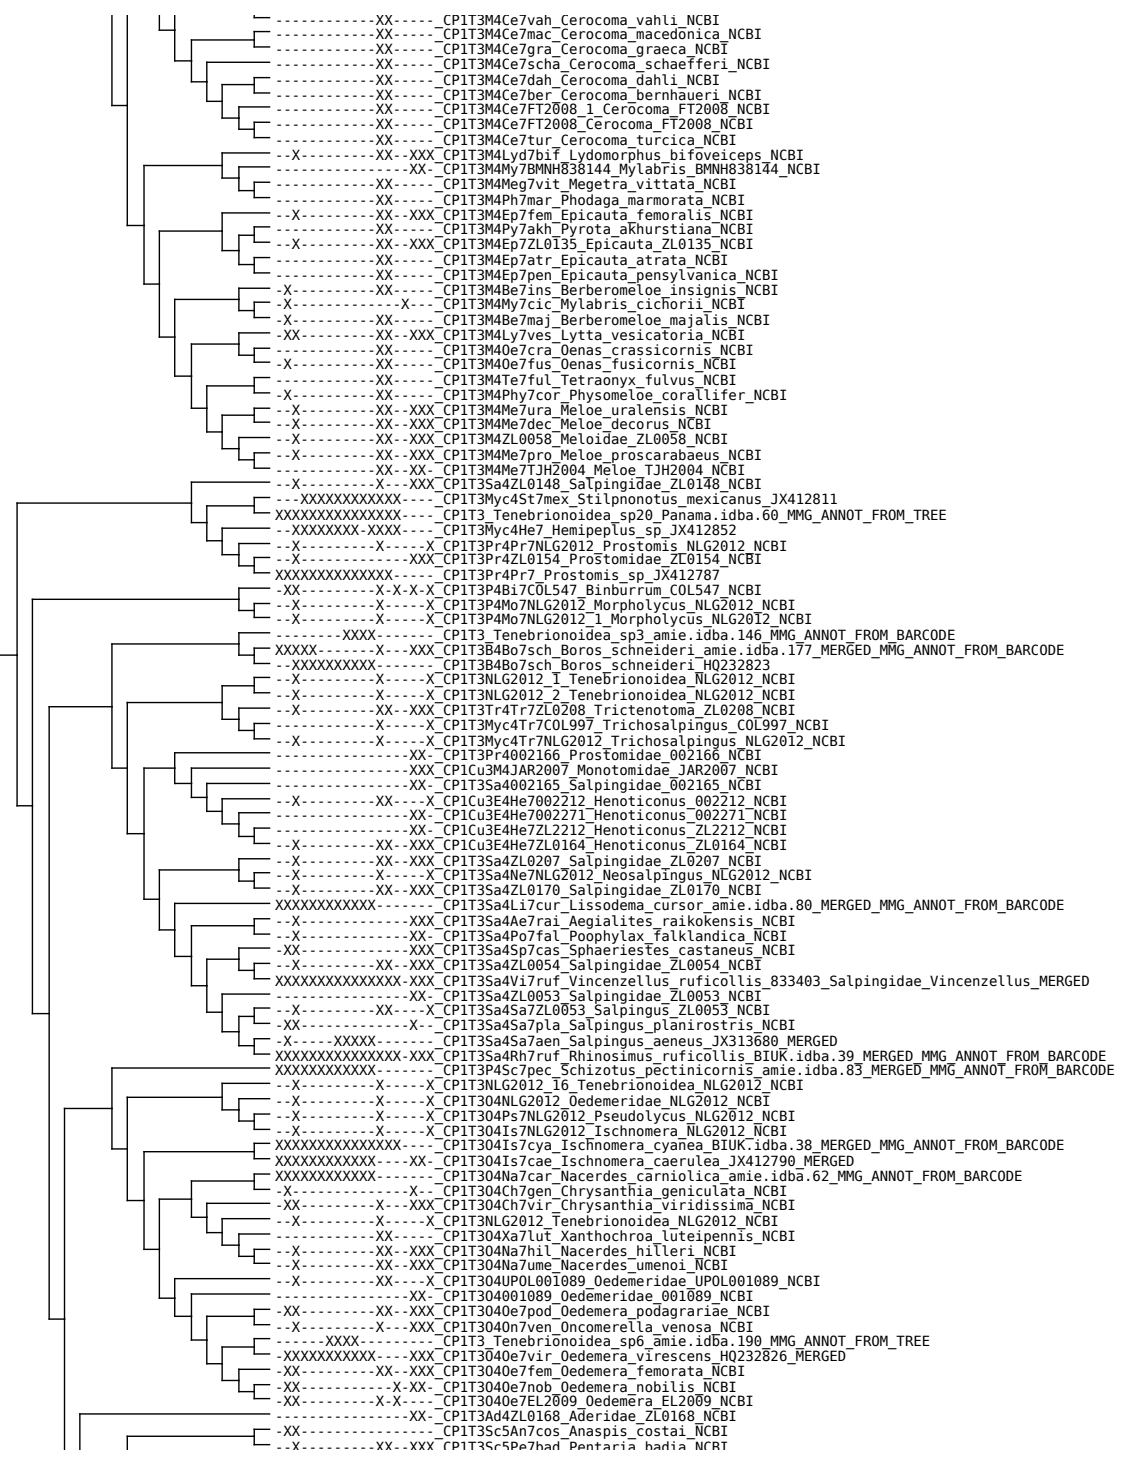

-----XX----- CP1T3M4Ce7vah\_Cerocoma\_vahlii\_NCBI  
-----XX----- CP1T3M4Ce7mac\_Cerocoma\_macedonica\_NCBI  
-----XX----- CP1T3M4Ce7gra\_Cerocoma\_graeca\_NCBI  
-----XX----- CP1T3M4Ce7scha\_Cerocoma\_schaefferi\_NCBI  
-----XX----- CP1T3M4Ce7dah\_Cerocoma\_dahlii\_NCBI  
-----XX----- CP1T3M4Ce7ber\_Cerocoma\_bernhaeueri\_NCBI  
-----XX----- CP1T3M4Ce7FT2008\_1\_Cerocoma\_FT2008\_NCBI  
-----XX----- CP1T3M4Ce7FT2008\_Cerocoma\_FT2008\_NCBI  
-----XX----- CP1T3M4Ce7tur\_Cerocoma\_turcica\_NCBI  
-X-----XX-XXX CP1T3M4Lyd7bi7\_Lydomorphus\_bifoveiceps\_NCBI  
-----XX-XXX CP1T3M4My7BMNH838144\_Mylabris\_BMNH838144\_NCBI  
-----XX----- CP1T3M4Meg7vit\_Megetra\_vittata\_NCBI  
-----XX----- CP1T3M4Ph7mar\_Phodaga\_marmorata\_NCBI  
-X-----XX-XXX CP1T3M4Ep7fem\_Epicauta\_femorialis\_NCBI  
-----XX----- CP1T3M4Py7akh\_Pyrota\_akhurstiana\_NCBI  
-X-----XX-XXX CP1T3M4Ep7ZL0135\_Epicauta\_ZL0135\_NCBI  
-----XX----- CP1T3M4Ep7atr\_Epicauta\_atrata\_NCBI  
-----XX----- CP1T3M4Ep7pen\_Epicauta\_pennsylvanica\_NCBI  
-X-----XX----- CP1T3M4Be7ins\_Berberomeloe\_insignis\_NCBI  
-X-----X----- CP1T3M4My7cic\_Mylabris\_cichorii\_NCBI  
-X-----XX----- CP1T3M4Be7maj\_Berberomeloe\_majalis\_NCBI  
-----XX-XXX CP1T3M4Ly7ves\_Lytta\_vesicatoria\_NCBI  
-----XX----- CP1T3M4Oe7Oenas\_crasnicornis\_NCBI  
-X-----XX----- CP1T3M4Oe7fus\_Oenas\_fusicornis\_NCBI  
-----XX----- CP1T3M4Te7ful\_Tetraonyx\_fulvus\_NCBI  
-X-----XX----- CP1T3M4Phy7coF\_Physomeloe\_corallifer\_NCBI  
-X-----XX-XXX CP1T3M4Me7ura\_Meloe\_uralensis\_NCBI  
-X-----XX-XXX CP1T3M4Me7dec\_Meloe\_decorus\_NCBI  
-X-----XX-XXX CP1T3M4ZL0058\_Meloidae\_ZL0058\_NCBI  
-X-----XX-XXX CP1T3M4Me7pro\_Meloe\_proscarabaeus\_NCBI  
-----XX-XX-CP1T3M4Me7TJH2004\_Meloe\_TJH2004\_NCBI  
-X-----X-XXX CP1T3Sa4ZL0148\_Salpingidae\_ZL0148\_NCBI  
XXXXXXXXXXXXX CP1T3Myc4St7mex\_Stilpnonotus\_mexicanus\_JX412811  
XXXXXXXXXXXXX CP1T3 Tenebrionidea\_sp20\_Panama.idba.60\_MMG\_ANNOT\_FROM\_TREE  
XXXXXXXXXX-XXXX CP1T3Myc4He7\_Hemipeplus\_sp\_JX412852  
-X-----X-----X CP1T3Pr4Pr7NLG2012\_Prostomis\_NLG2012\_NCBI  
-X-----XXX CP1T3Pr4ZL0154\_Prostomidae\_ZL0154\_NCBI  
XXXXXXXXXXXXX CP1T3Pr4Pr7\_Prostomis\_sp\_JX412787  
-X-----X-X-X-CP1T3PA87COL547\_Binburrum\_COL547\_NCBI  
-X-----X-----X CP1T3PA47NLG2012\_Morpholycus\_NLG2012\_NCBI  
-X-----X-----X CP1T3PA407NLG2012\_1\_Morpholycus\_NLG2012\_NCBI  
-----XXXX----- CP1T3 Tenebrionidea\_sp3\_ame.idba.146\_MMG\_ANNOT\_FROM\_BARCODE  
XXXXX-X-XXX CP1T3B4Bo7sch\_Boros\_schneideri\_ame.idba.177\_MERGED\_MMG\_ANNOT\_FROM\_BARCODE  
XXXXXXXXXXXXX CP1T3B4Bo7sch\_Boros\_schneideri\_HQ232823  
-X-----X-----X CP1T3NLG2012\_1\_Tenebrionidea\_NLG2012\_NCBI  
-X-----X-----X CP1T3NLG2012\_2\_Tenebrionidea\_NLG2012\_NCBI  
-X-----XX-XXX CP1T3Tr4Tr7ZL0208\_Trictenotoma\_ZL0208\_NCBI  
-X-----X-----X CP1T3Myc4Tr7COL997\_Trichosalpingus\_COL997\_NCBI  
-X-----X-----X CP1T3Myc4Tr7NLG2012\_Trichosalpingus\_NLG2012\_NCBI  
-----XX-CP1T3Pr4002166\_Prostomidae\_002166\_NCBI  
-----XXX CP1Cu3M4JAR2007\_Monotomidae\_JAR2007\_NCBI  
-----XX-CP1T3Sa4002165\_Salpingidae\_002165\_NCBI  
-X-----XX-X-CP1Cu3E4He7002212\_Henoticonus\_002212\_NCBI  
-----XX-CP1Cu3E4He7002271\_Henoticonus\_002271\_NCBI  
-----XX-CP1Cu3E4He7ZL2212\_Henoticonus\_ZL2212\_NCBI  
-X-----XX-XXX CP1Cu3E4He7ZL0164\_Henoticonus\_ZL0164\_NCBI  
-X-----XX-XXX CP1T3Sa4ZL0207\_Salpingidae\_ZL0207\_NCBI  
-X-----X-----X CP1T3Sa4He7NLG2012\_Neosalpingus\_NLG2012\_NCBI  
-X-----XX-XXX CP1T3Sa4ZL0170\_Salpingidae\_ZL0170\_NCBI  
XXXXXXXXXXXXX CP1T3Sa4Li7cur\_Lissodema\_cursor\_ame.idba.80\_MERGED\_MMG\_ANNOT\_FROM\_BARCODE  
-----XX-CP1T3Sa4Ae7rai\_Aegialites\_raikokensis\_NCBI  
-X-----XX-CP1T3Sa4Po7fal\_Poophylax\_falklandica\_NCBI  
-----XX-CP1T3Sa4Sp7cas\_Sphaeriestes\_castaneus\_NCBI  
-X-----XX-XXX CP1T3Sa4ZL0054\_Salpingidae\_ZL0054\_NCBI  
XXXXXXXXXXXXX-XXX CP1T3Sa4Vi7ruf\_Vincenzellus\_ruficollis\_833403\_Salpingidae\_Vincenzellus\_MERGED  
-----XX-CP1T3Sa4ZL0053\_Salpingidae\_ZL0053\_NCBI  
-X-----XX-X-CP1T3Sa4Sa7ZL0053\_Salpingus\_ZL0053\_NCBI  
-----XX-X-CP1T3Sa4Sa7pla\_Salpingus\_planirostris\_NCBI  
-X-----XXXX----- CP1T3Sa4Sa7aen\_Salpingus\_aeneus\_JX313680\_MERGED  
XXXXXXXXXXXXX-XXX CP1T3Sa4Rh7ruf\_Rhinosimus\_ruficollis\_BIUK.idba.39\_MERGED\_MMG\_ANNOT\_FROM\_BARCODE  
XXXXXXXXXXXXX CP1T3P4Sc7pec\_Schizotus\_pectinicornis\_ame.idba.83\_MERGED\_MMG\_ANNOT\_FROM\_BARCODE  
-X-----X-----X CP1T3NLG2012\_16\_Tenebrionidea\_NLG2012\_NCBI  
-X-----X-----X CP1T304NLG2012\_Oedemeridae\_NLG2012\_NCBI  
-X-----X-----X CP1T304Ps7NLG2012\_Pseudolycus\_NLG2012\_NCBI  
-X-----X-----X CP1T304Is7NLG2012\_Ischnomera\_NLG2012\_NCBI  
XXXXXXXXXXXXX-CP1T304Is7cya\_Ischnomera\_cyanea\_BIUK.idba.38\_MERGED\_MMG\_ANNOT\_FROM\_BARCODE  
XXXXXXXXXXXXX-CP1T304Is7cae\_Ischnomera\_caerulea\_JX412790\_MERGED  
XXXXXXXXXXXXX-CP1T304Na7cae\_Nacerdes\_carniolica\_ame.idba.62\_MMG\_ANNOT\_FROM\_BARCODE  
-X-----X-----X CP1T304Ch7gen\_Chrysanthia\_geniculata\_NCBI  
-X-----X-XXX CP1T304Ch7vir\_Chrysanthia\_viridissima\_NCBI  
-X-----X-----X CP1T3NLG2012\_Tenebrionidea\_NLG2012\_NCBI  
-----XX-CP1T304Xa7lut\_Xanthochroa\_luteipennis\_NCBI  
-X-----XX-XXX CP1T304Na7hil\_Nacerdes\_hilferi\_NCBI  
-X-----XX-XXX CP1T304Na7ume\_Nacerdes\_umenoi\_NCBI  
-X-----XX-X-CP1T304UPOL001089\_Oedemeridae\_UPOL001089\_NCBI  
-----XX-CP1T304001089\_Oedemeridae\_001089\_NCBI  
-X-----XX-XXX CP1T3040e7pod\_Oedemera\_podagrariae\_NCBI  
-X-----X-XXX CP1T3040n7ven\_Oncomerella\_venosa\_NCBI  
-----XXXX----- CP1T3 Tenebrionidea\_sp6\_ame.idba.190\_MMG\_ANNOT\_FROM\_TREE  
XXXXXXXXXXXXX-XXX CP1T3040e7vir\_Oedemera\_virescens\_HQ232826\_MERGED  
-X-----XX-XXX CP1T3040e7fem\_Oedemera\_femorata\_NCBI  
-X-----X-XX-CP1T3040e7nob\_Oedemera\_nobilis\_NCBI  
-X-----X-X-CP1T3040e7EL2009\_Oedemera\_EL2009\_NCBI  
-----XX-CP1T3Ad4ZL0168\_Aderidae\_ZL0168\_NCBI  
-X-----XX-CP1T3Sc5An7cos\_Anaspis\_costai\_NCBI  
-X-----XX-XXX CP1T3Sc5Pa7had\_Pentaria\_hadia\_NCBI

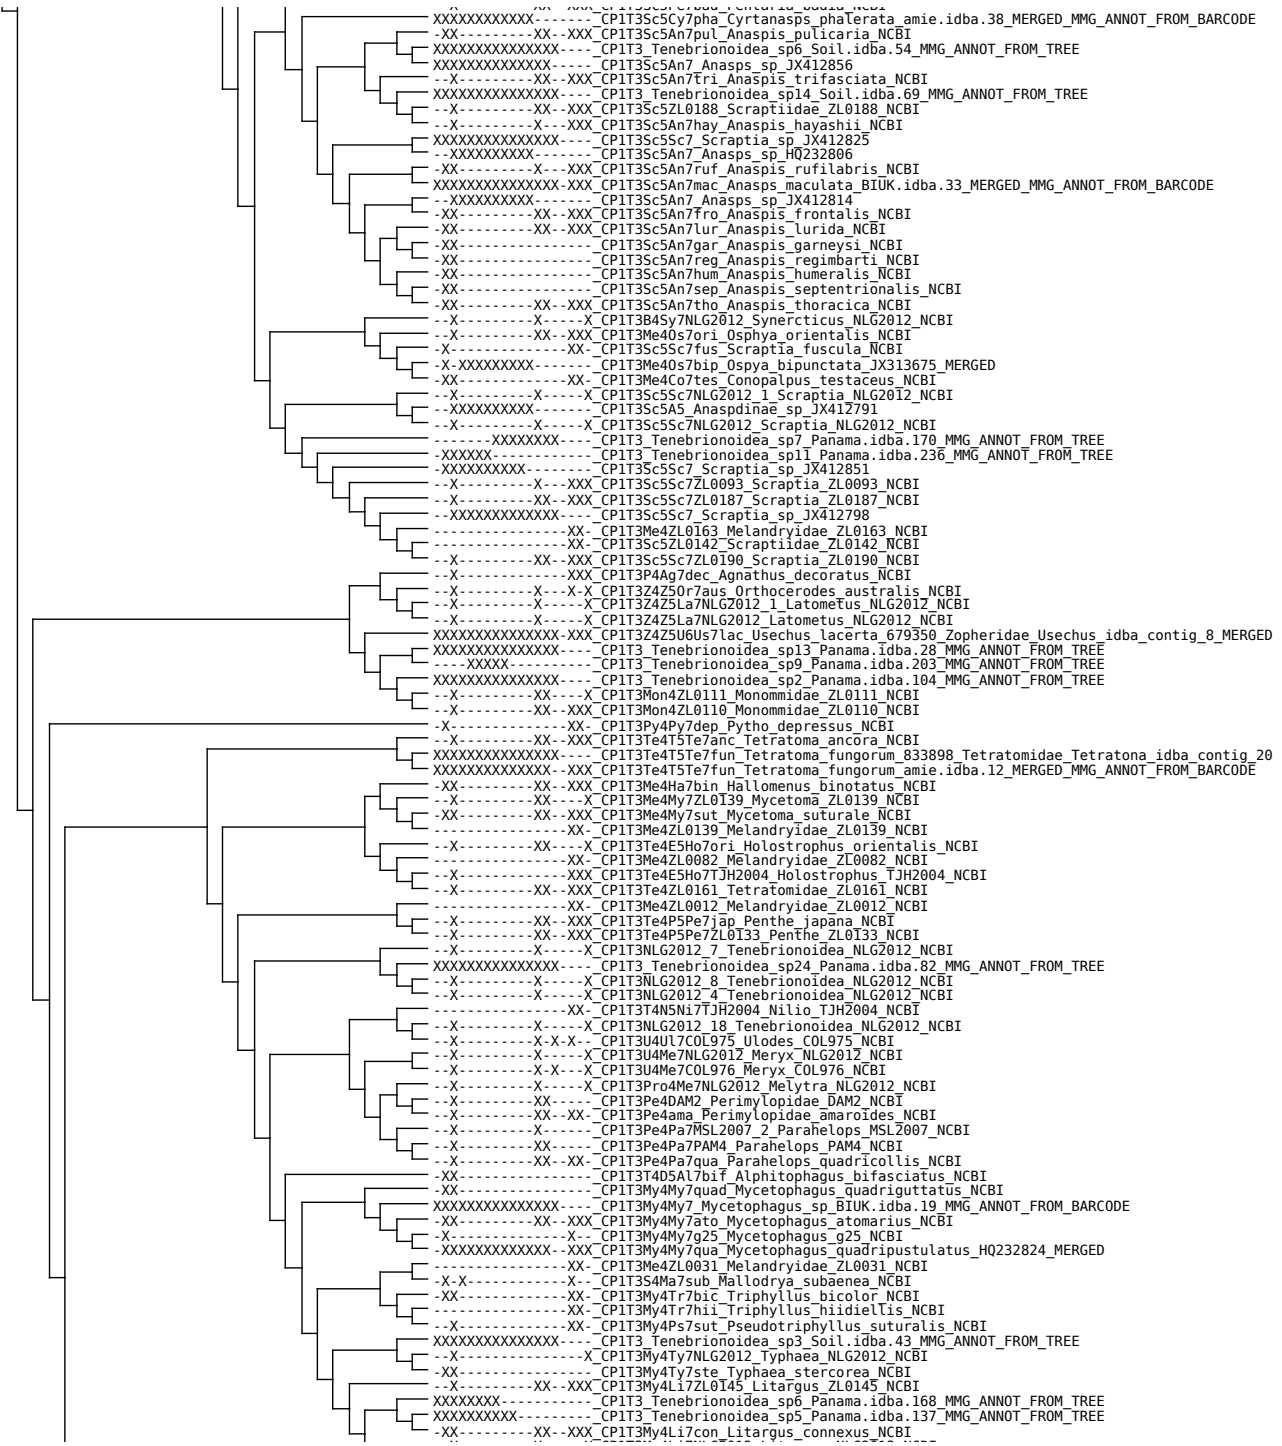

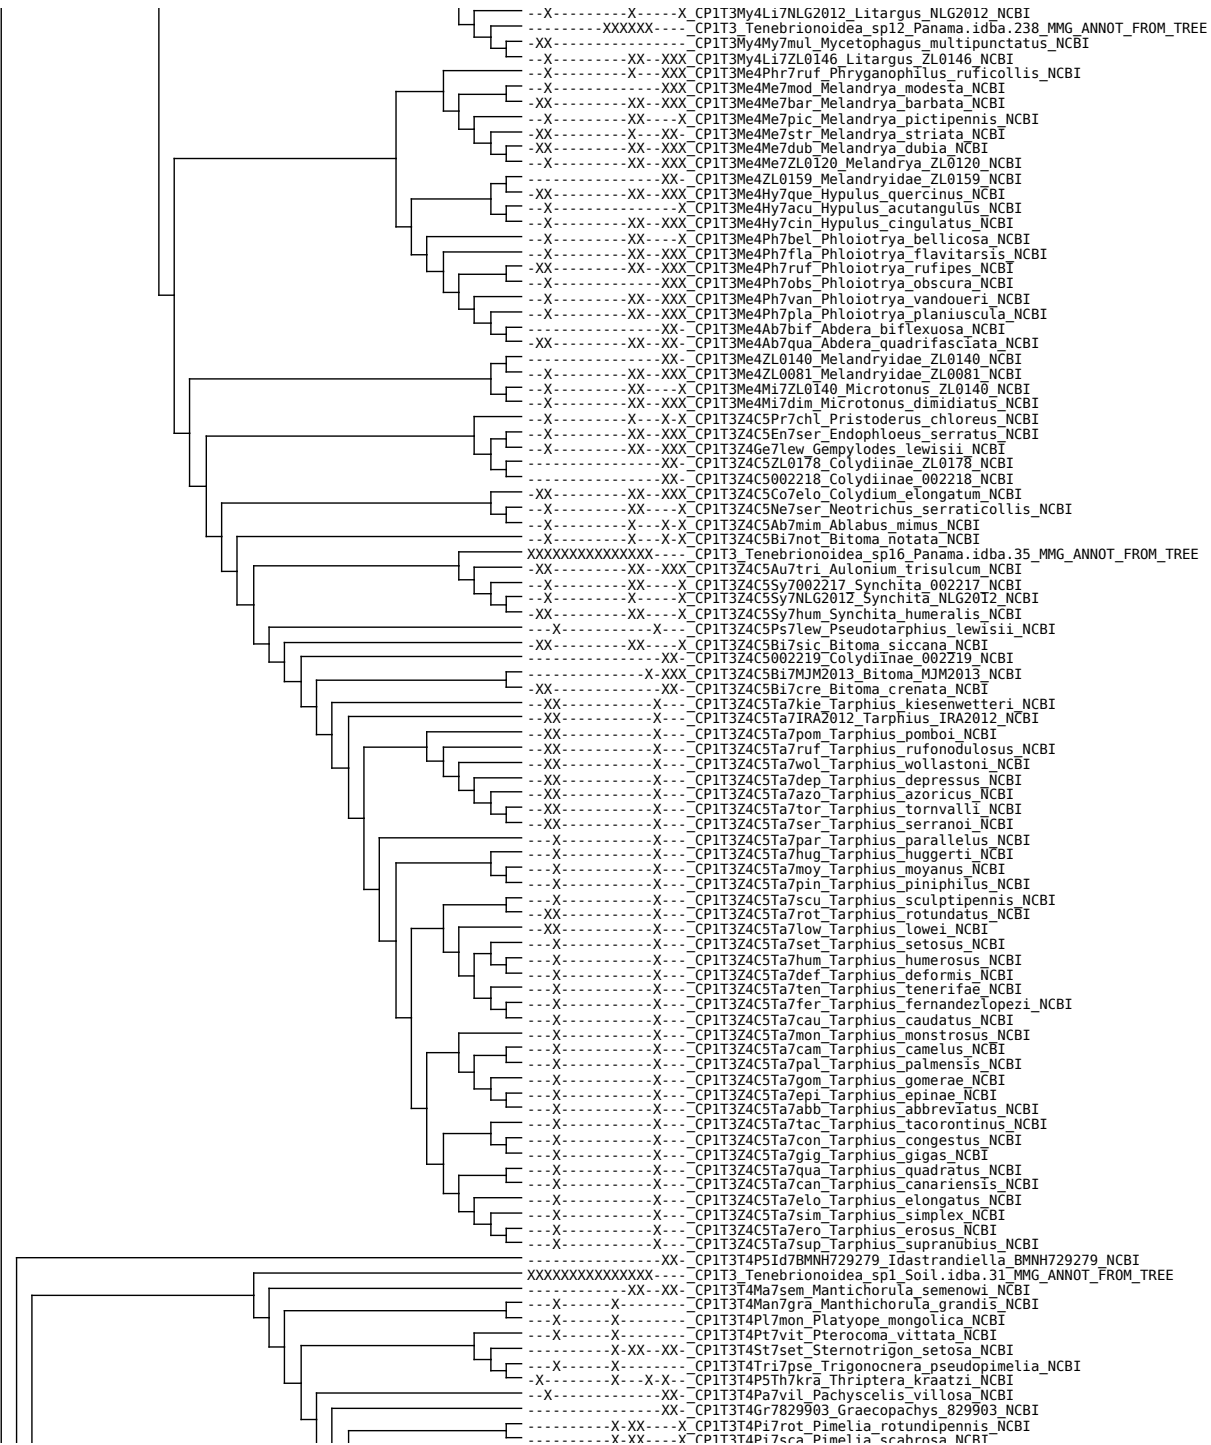

Phylogenetic tree showing relationships between various species, with labels on the right side. The tree is rooted on the left and branches out to the right. The labels include species names and accession numbers, such as CP1T3T4P17sub\_Pimelia\_subglobosa NCBI, CP1T3T4P17rug\_Pimelia\_rugosa NCBI, and CP1T3T4P5Le7col\_Leptoderis\_collaris NCBI. The tree is annotated with 'X' and 'XX' characters at the tips of the branches, indicating specific characteristics or support values. The species names are listed in a column on the right, with some names truncated or partially obscured by the tree's structure. The tree shows a complex branching pattern, with many species clustered together and others more distinct. The labels are aligned to the right of the tree, and the tree itself is drawn with thin black lines. The overall layout is a standard phylogenetic tree representation.

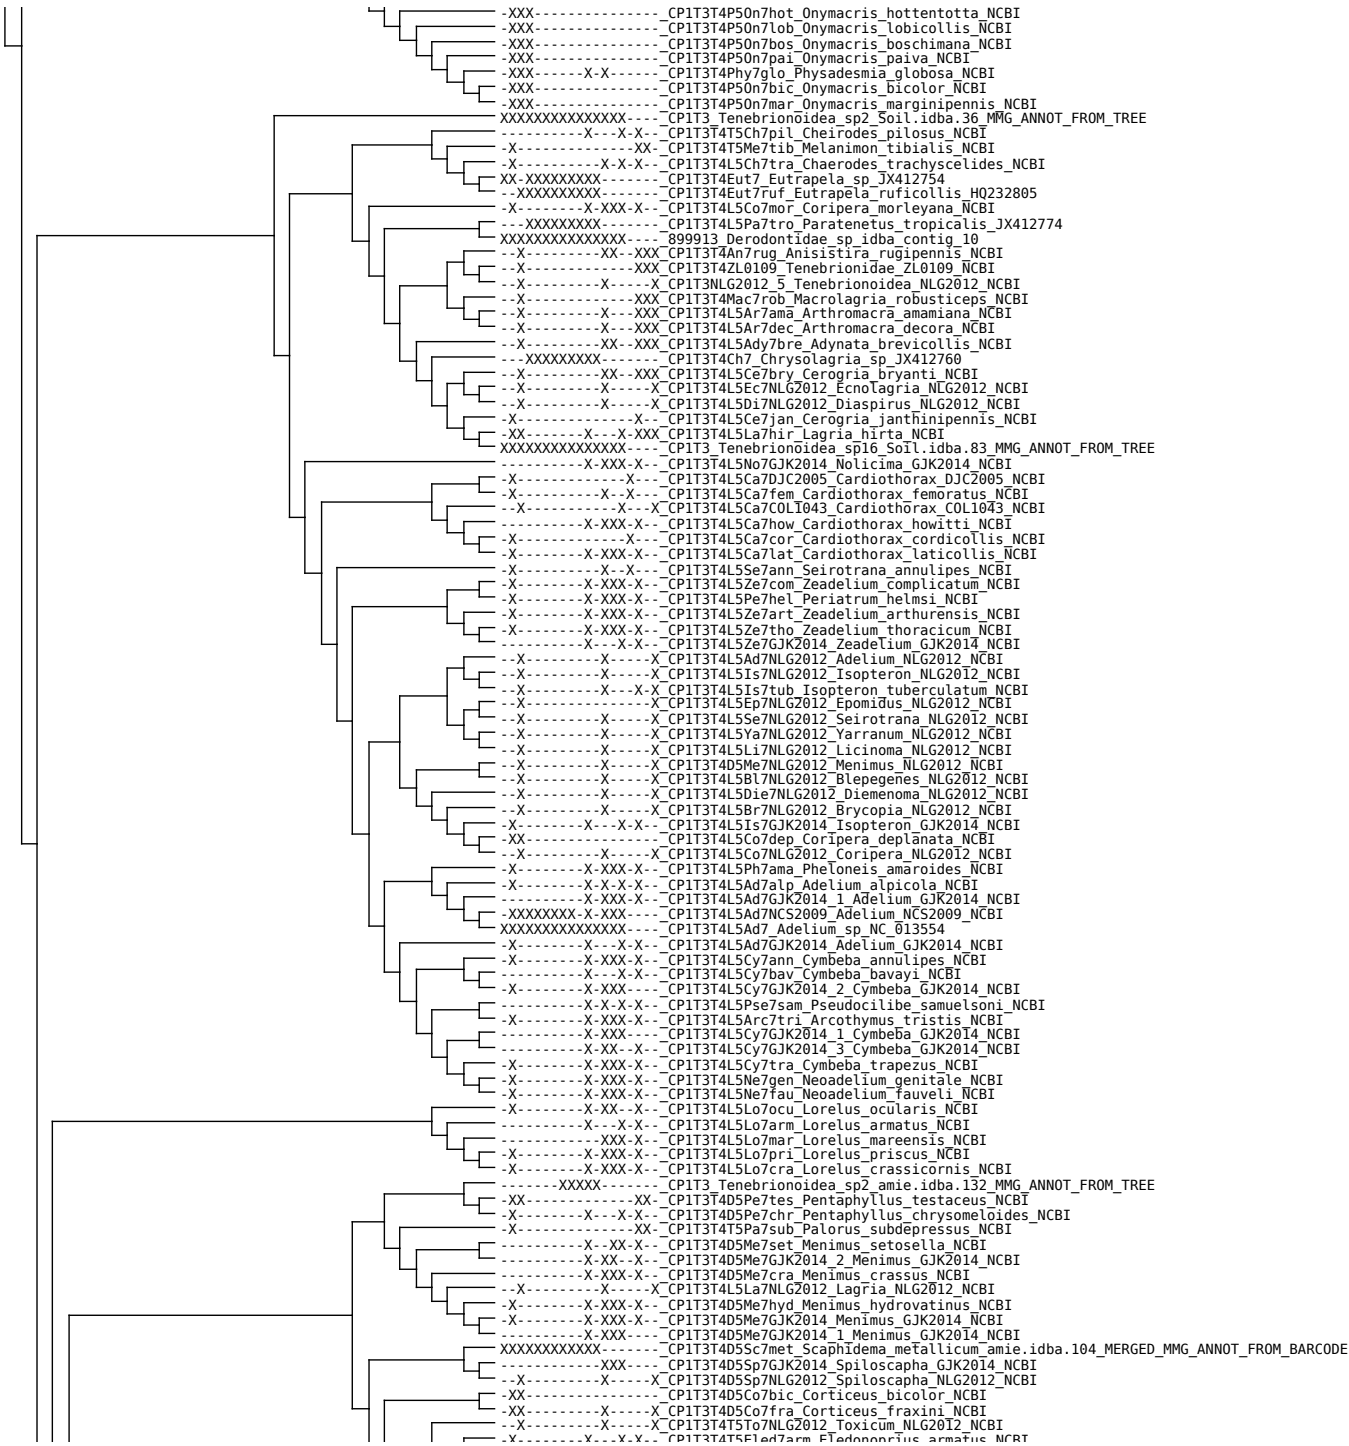

---XXX----- CP1T3T4P50n7hot Onymacris hottentotta NCBI  
---XXX----- CP1T3T4P50n7lob Onymacris lobicolis NCBI  
---XXX----- CP1T3T4P50n7bos Onymacris boschimana NCBI  
---XXX----- CP1T3T4P50n7pai Onymacris paiva NCBI  
---XXX----- CP1T3T4Phy7glo Physadesmia globosa NCBI  
---XXX----- CP1T3T4P50n7bic Onymacris bicolor NCBI  
---XXX----- CP1T3T4P50n7mar Onymacris marginipennis NCBI  
XXXXXXXXXXXXX CP1T3 Tenebrionoidea sp2 Soil idba.36 MMG\_ANNOT\_FROM\_TREE  
---X---X---X CP1T3T4T5Ch7pil Cheiropodes pilosus NCBI  
---X---X---X CP1T3T4T5Me7tib Melanimon tibialis NCBI  
---X---X---X CP1T3T4L5Ch7tra Chaerodes trachyscelides NCBI  
XX-XXXXXXXXX CP1T3T4Eut7 Eutrappela sp\_JX412754  
---XXXXXXXXX CP1T3T4Eut7Fuf Eutrappela\_ruficollis HQ232805  
---X---X---X CP1T3T4L5Co7mor Coripera morleyana NCBI  
---XXXXXXXXX CP1T3T4L5Pa7tro Paratenetus tropicalis JX412774  
XXXXXXXXXXXXX 899913 Derodontidae sp\_idba\_contig\_10  
---X---XX-XXX CP1T3T4An7rug Anisistira rugipennis NCBI  
---X---XXX CP1T3T4ZL0109 Tenebrionidae\_ZL0109 NCBI  
---X---X---X CP1T3NLG2012\_5 Tenebrionoidea\_NLG2012 NCBI  
---X---XXX CP1T3T4Mac7rob Macrolagria robusticeps NCBI  
---X---X---X CP1T3T4L5Ar7ama Arthromacra amamiana NCBI  
---X---X---X CP1T3T4L5Ar7dec Arthromacra decora NCBI  
---X---XX-XXX CP1T3T4L5Ady7bre Adynata brevicollis NCBI  
---XXXXXXXXX CP1T3T4Ch7 Chrysolagria sp\_JX412760  
---XXX-XXX CP1T3T4L5C7bry Cerogria bryanti NCBI  
---X---X---X CP1T3T4L5Ec7NLG2012 Ecnolagria\_NLG2012 NCBI  
---X---X---X CP1T3T4L5Di7NLG2012 Diaspirus\_NLG2012 NCBI  
---X---X---X CP1T3T4L5Ce7jan Cerogria\_janthinipennis NCBI  
---XX---X---X-XXX CP1T3T4L5La7hir Lagria\_hirta NCBI  
XXXXXXXXXXXXX CP1T3 Tenebrionoidea\_sp16\_Soil\_idba.83\_MMG\_ANNOT\_FROM\_TREE  
---X---X---X-XXX CP1T3T4L5No7GJK2014 Nolicima\_GJK2014 NCBI  
---X---X---X CP1T3T4L5Ca7DJC2005 Cardiothorax\_DJC2005 NCBI  
---X---X---X CP1T3T4L5Ca7fem Cardiothorax\_femoratus NCBI  
---X---X---X CP1T3T4L5Ca7COL1043 Cardiothorax\_COL1043 NCBI  
---X---X---X CP1T3T4L5Ca7how Cardiothorax\_howitti NCBI  
---X---X---X CP1T3T4L5Ca7cor Cardiothorax\_cordicollis NCBI  
---X---X---X CP1T3T4L5Ca7lat Cardiothorax\_laticollis NCBI  
---X---X---X CP1T3T4L5Se7ann Seirotrana\_annulipes NCBI  
---X---X---X CP1T3T4L5Ze7com Zeadelium\_complicatum NCBI  
---X---X---X CP1T3T4L5Pe7hel Periatrum\_helmsi NCBI  
---X---X---X CP1T3T4L5Ze7art Zeadelium\_arthurensis NCBI  
---X---X---X CP1T3T4L5Ze7tho Zeadelium\_thoracicum NCBI  
---X---X---X CP1T3T4L5Ze7GJK2014 Zeadelium\_GJK2014 NCBI  
---X---X---X CP1T3T4L5Ad7NLG2012 Adelium\_NLG2012 NCBI  
---X---X---X CP1T3T4L5Is7NLG2012 Isopteron\_NLG2012 NCBI  
---X---X---X CP1T3T4L5Is7tub Isopteron\_tuberculatum NCBI  
---X---X---X CP1T3T4L5Ep7NLG2012 Epomidus\_NLG2012 NCBI  
---X---X---X CP1T3T4L5Se7NLG2012 Seirotrana\_NLG2012 NCBI  
---X---X---X CP1T3T4L5Ya7NLG2012 Yarranum\_NLG2012 NCBI  
---X---X---X CP1T3T4L5Li7NLG2012 Licinoma\_NLG2012 NCBI  
---X---X---X CP1T3T4D5Me7NLG2012 Menimus\_NLG2012 NCBI  
---X---X---X CP1T3T4L5Bl7NLG2012 Blepegenes\_NLG2012 NCBI  
---X---X---X CP1T3T4L5Di7NLG2012 Diemenoma\_NLG2012 NCBI  
---X---X---X CP1T3T4L5Br7NLG2012 Brycopia\_NLG2012 NCBI  
---X---X---X CP1T3T4L5Is7GJK2014 Isopteron\_GJK2014 NCBI  
---XX---X---X CP1T3T4L5Co7dep Coripera\_deplanata NCBI  
---X---X---X CP1T3T4L5Co7NLG2012 Coripera\_NLG2012 NCBI  
---X---X---X CP1T3T4L5Ph7ama Pheleoneis\_amaroides NCBI  
---X---X---X CP1T3T4L5Ad7alp Adelium\_alpicola NCBI  
---X---X---X CP1T3T4L5Ad7GJK2014\_1 Adelium\_GJK2014 NCBI  
---XXXXXXXXX CP1T3T4L5Ad7NCS2009 Adelium\_NCS2009 NCBI  
XXXXXXXXXXXXX CP1T3T4L5Ad7 Adelium\_sp\_NC\_013554  
---X---X---X CP1T3T4L5Ad7GJK2014 Adelium\_GJK2014 NCBI  
---X---X---X CP1T3T4L5Cy7ann Cymbeba\_annulipes NCBI  
---X---X---X CP1T3T4L5Cy7bav Cymbeba\_bavayi NCBI  
---X---X---X CP1T3T4L5Cy7GJK2014\_2 Cymbeba\_GJK2014 NCBI  
---X---X---X CP1T3T4L5Pse7sam Pseudoclibe\_samuelsoni NCBI  
---X---X---X CP1T3T4L5Arc7tri Arcothymus\_tristis NCBI  
---X---X---X CP1T3T4L5Cy7GJK2014\_1 Cymbeba\_GJK2014 NCBI  
---X---X---X CP1T3T4L5Cy7GJK2014\_3 Cymbeba\_GJK2014 NCBI  
---X---X---X CP1T3T4L5Cy7tra Cymbeba\_trapezus NCBI  
---X---X---X CP1T3T4L5Ne7gen Neoadelium\_genitale NCBI  
---X---X---X CP1T3T4L5Ne7fau Neoadelium\_fauveli NCBI  
---X---X---X CP1T3T4L5Lo7ocu Lorelus\_ocularis NCBI  
---X---X---X CP1T3T4L5Lo7arm Lorelus\_armatus NCBI  
---X---X---X CP1T3T4L5Lo7mar Lorelus\_marensis NCBI  
---X---X---X CP1T3T4L5Lo7pri Lorelus\_priscus NCBI  
---X---X---X CP1T3T4L5Lo7cra Lorelus\_crassicornis NCBI  
---XXXXX--- CP1T3 Tenebrionoidea\_sp2\_ame\_idba.132\_MMG\_ANNOT\_FROM\_TREE  
---XX---XX- CP1T3T4D5Pa7tes Pentaphyllus\_testaceus NCBI  
---X---X---X CP1T3T4D5Pa7chr Pentaphyllus\_chrysomeloides NCBI  
---X---X---X CP1T3T4T5Pa7sub Palorus\_subdepressus NCBI  
---X---X---X CP1T3T4D5Me7set Menimus\_setosella NCBI  
---X---X---X CP1T3T4D5Me7GJK2014\_2 Menimus\_GJK2014 NCBI  
---X---X---X CP1T3T4D5Me7cra Menimus\_crassus NCBI  
---X---X---X CP1T3T4L5La7NLG2012 Lagria\_NLG2012 NCBI  
---X---X---X CP1T3T4D5Me7hyd Menimus\_hydrovatinus NCBI  
---X---X---X CP1T3T4D5Me7GJK2014 Menimus\_GJK2014 NCBI  
---X---X---X CP1T3T4D5Me7GJK2014\_1 Menimus\_GJK2014 NCBI  
XXXXXXXXXXXXX CP1T3T4D5Sc7met Scaphidema\_metallicum\_ame\_idba.104\_MERGED\_MMG\_ANNOT\_FROM\_BARCODE  
---X---XXX CP1T3T4D5Sp7GJK2014 Spiloscapa\_GJK2014 NCBI  
---X---X---X CP1T3T4D5Sp7NLG2012 Spiloscapa\_NLG2012 NCBI  
---XX---X---X CP1T3T4D5Co7bic Corticeus\_bicolor NCBI  
---XX---X---X CP1T3T4D5Co7fra Corticeus\_fraxini NCBI  
---X---X---X CP1T3T4T5To7NLG2012 Toxicum\_NLG2012 NCBI  
---X---X---X CP1T3T4T5Ed7arm Etdonoporus\_armatus NCBI



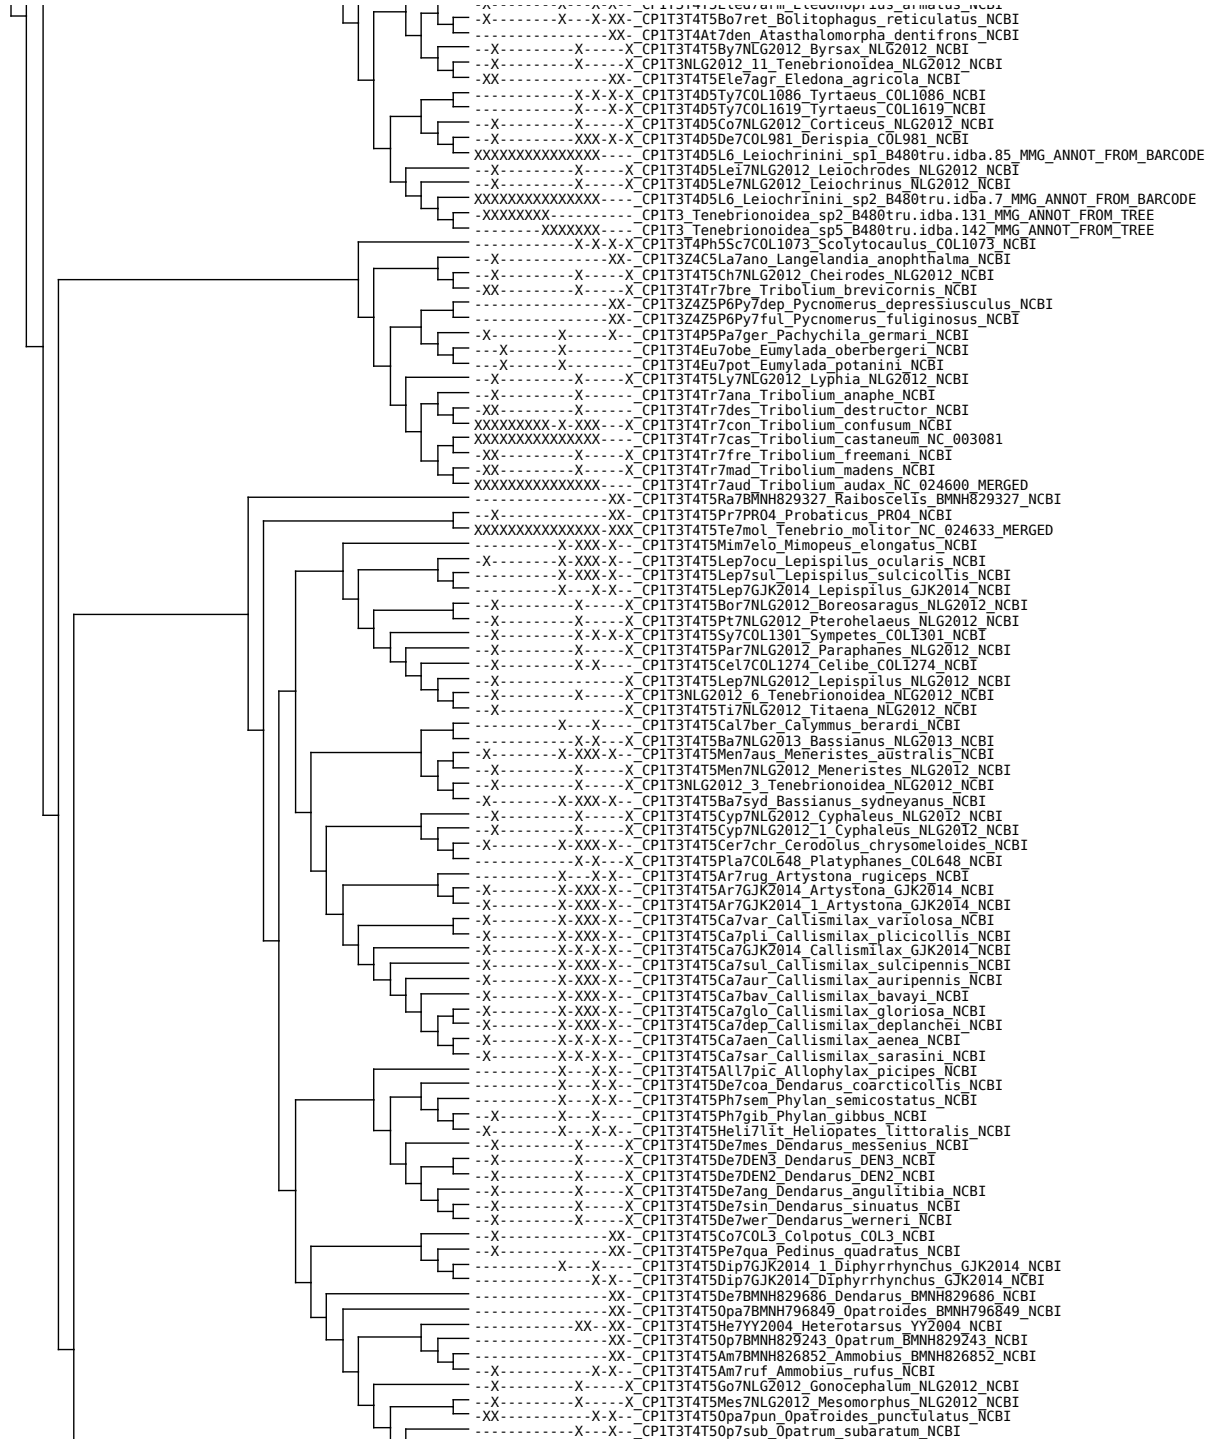

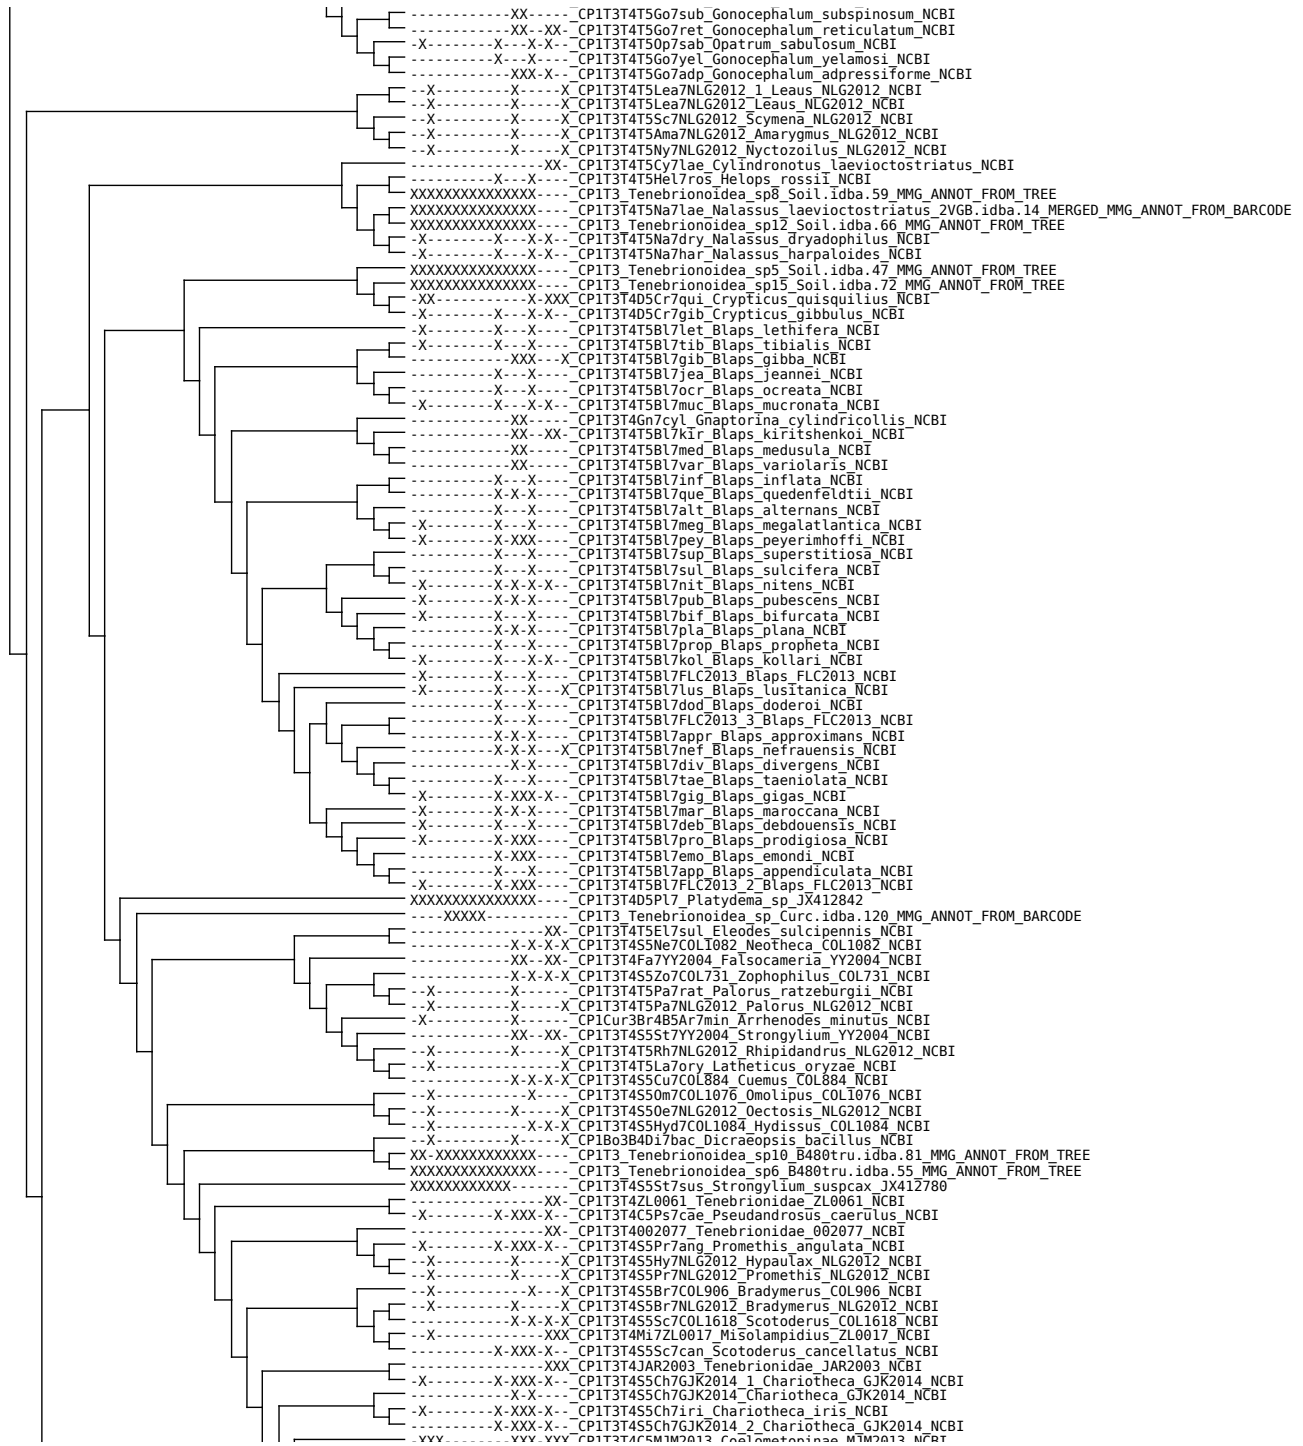



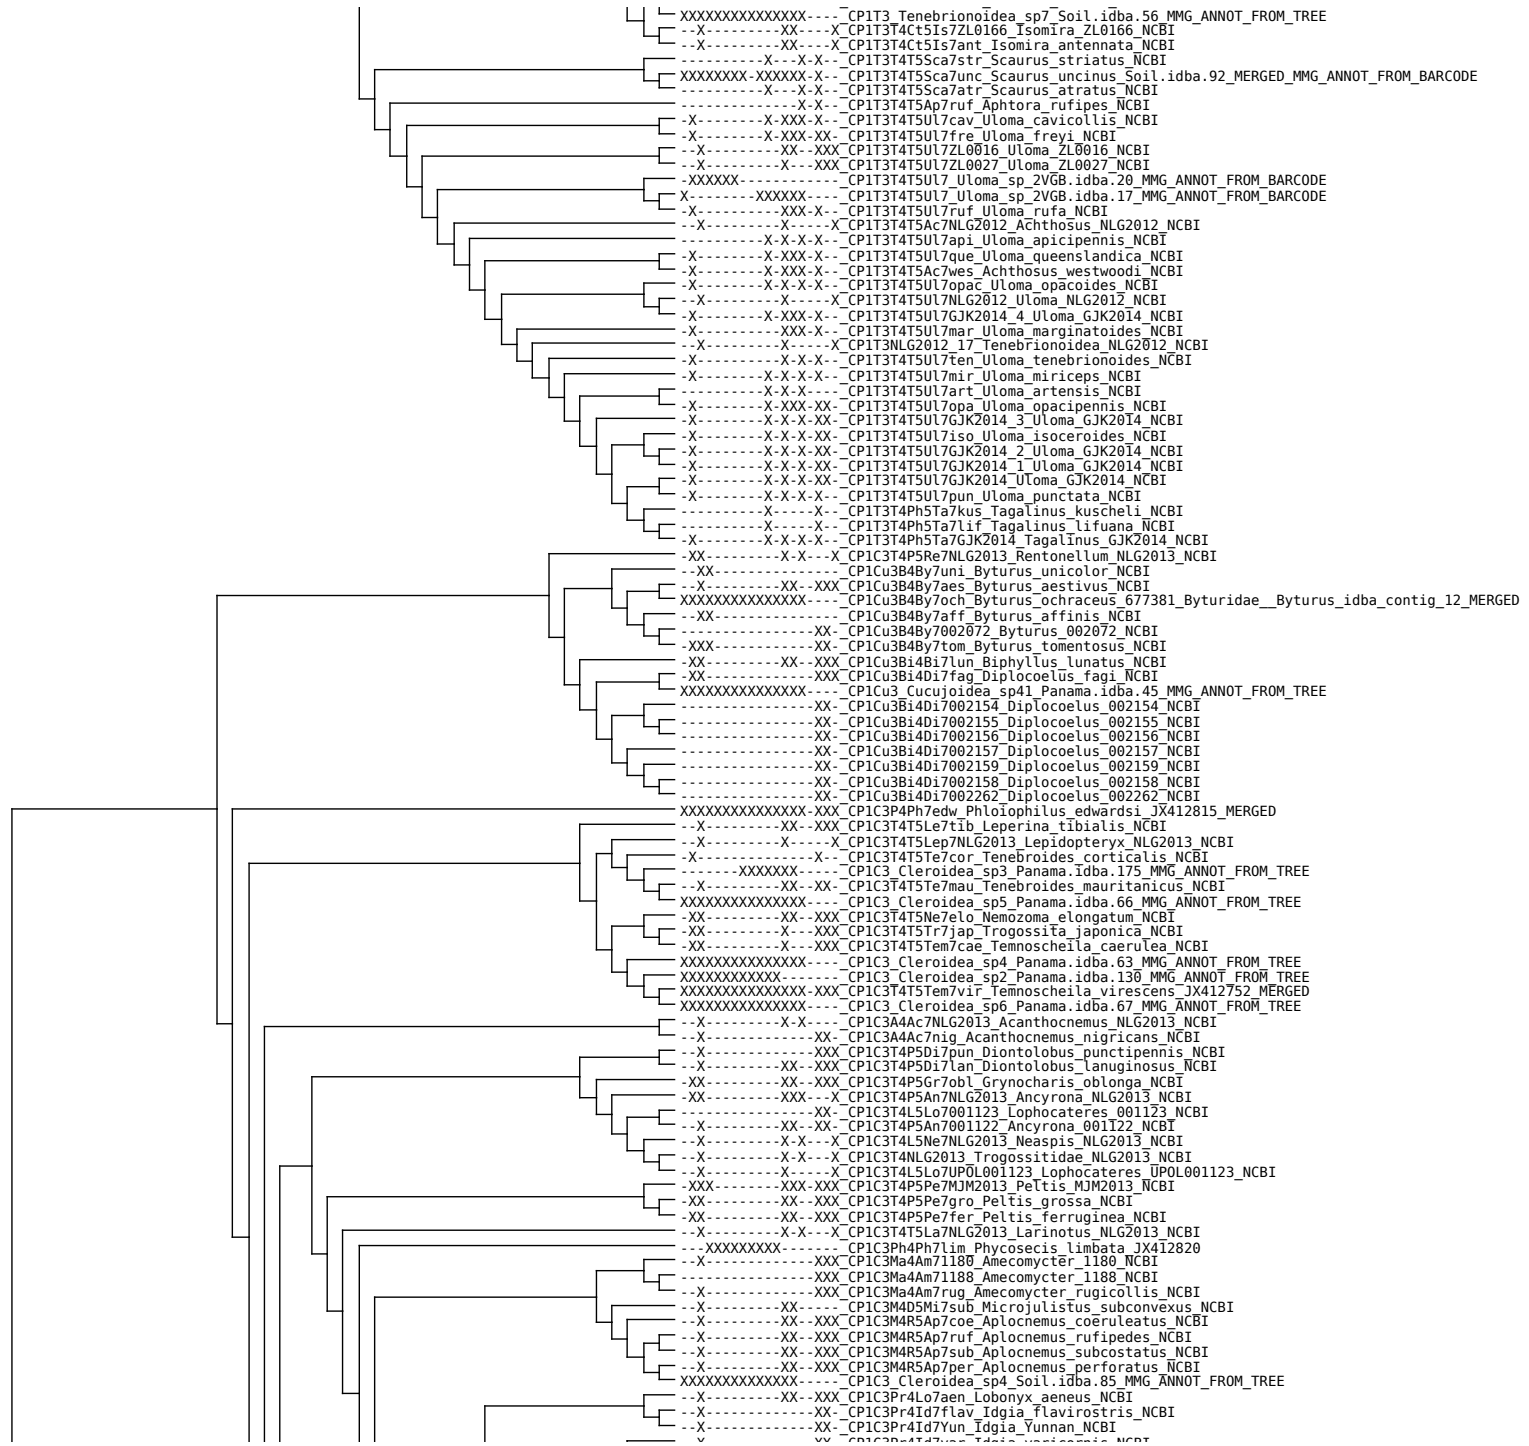

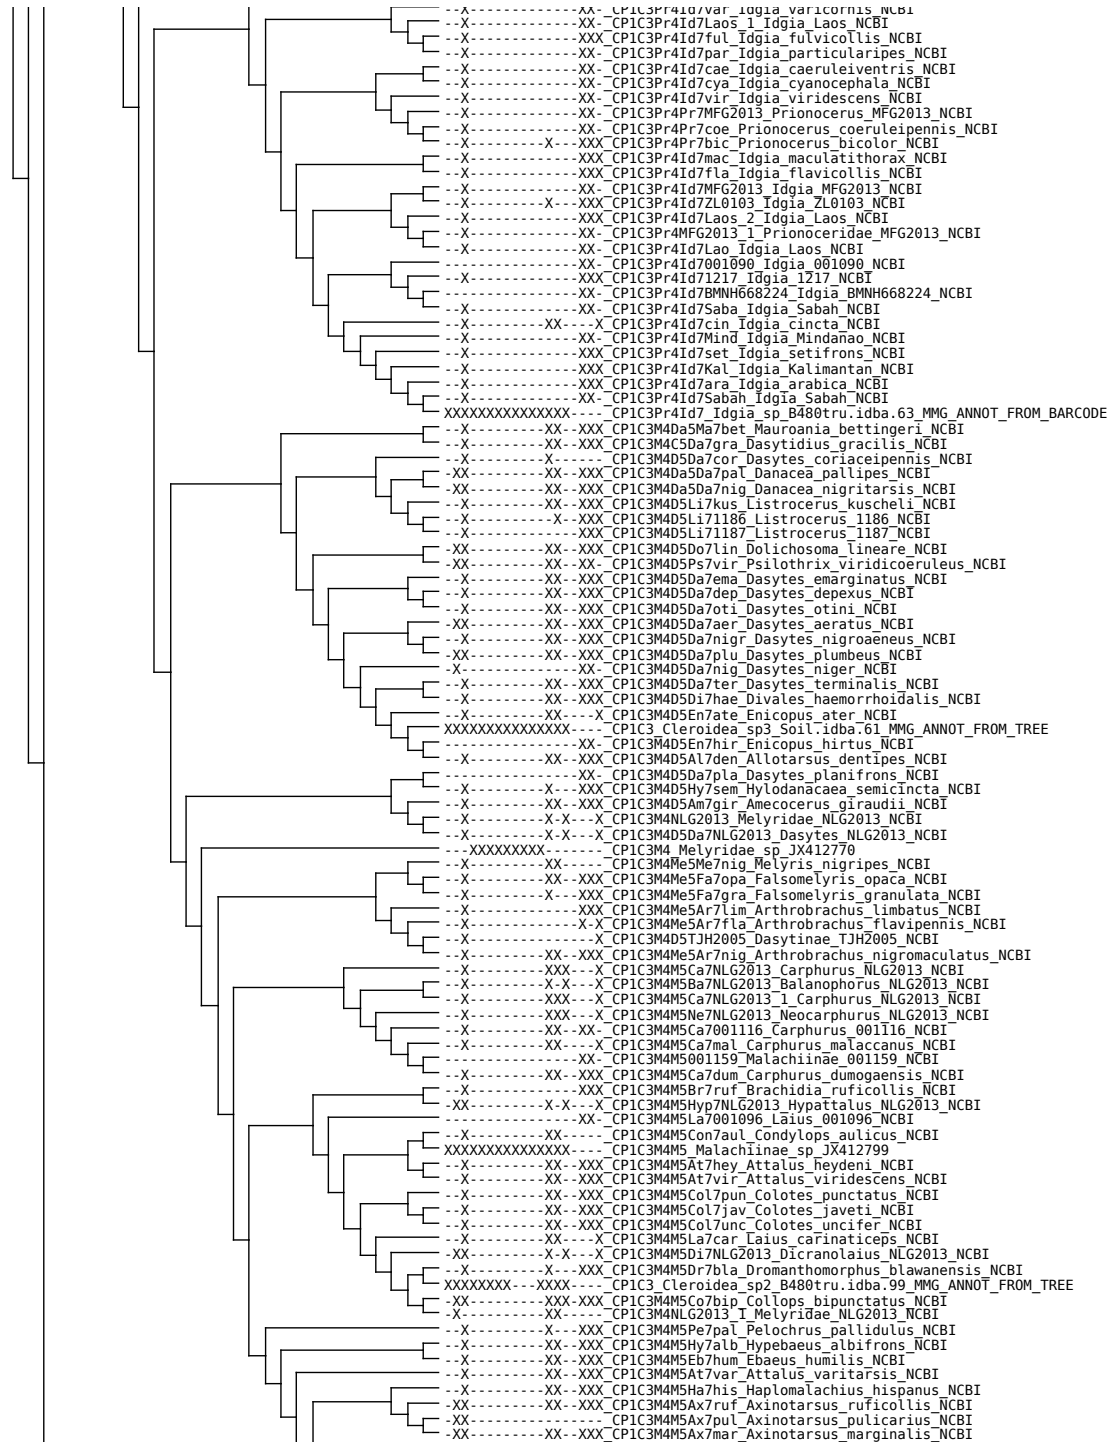

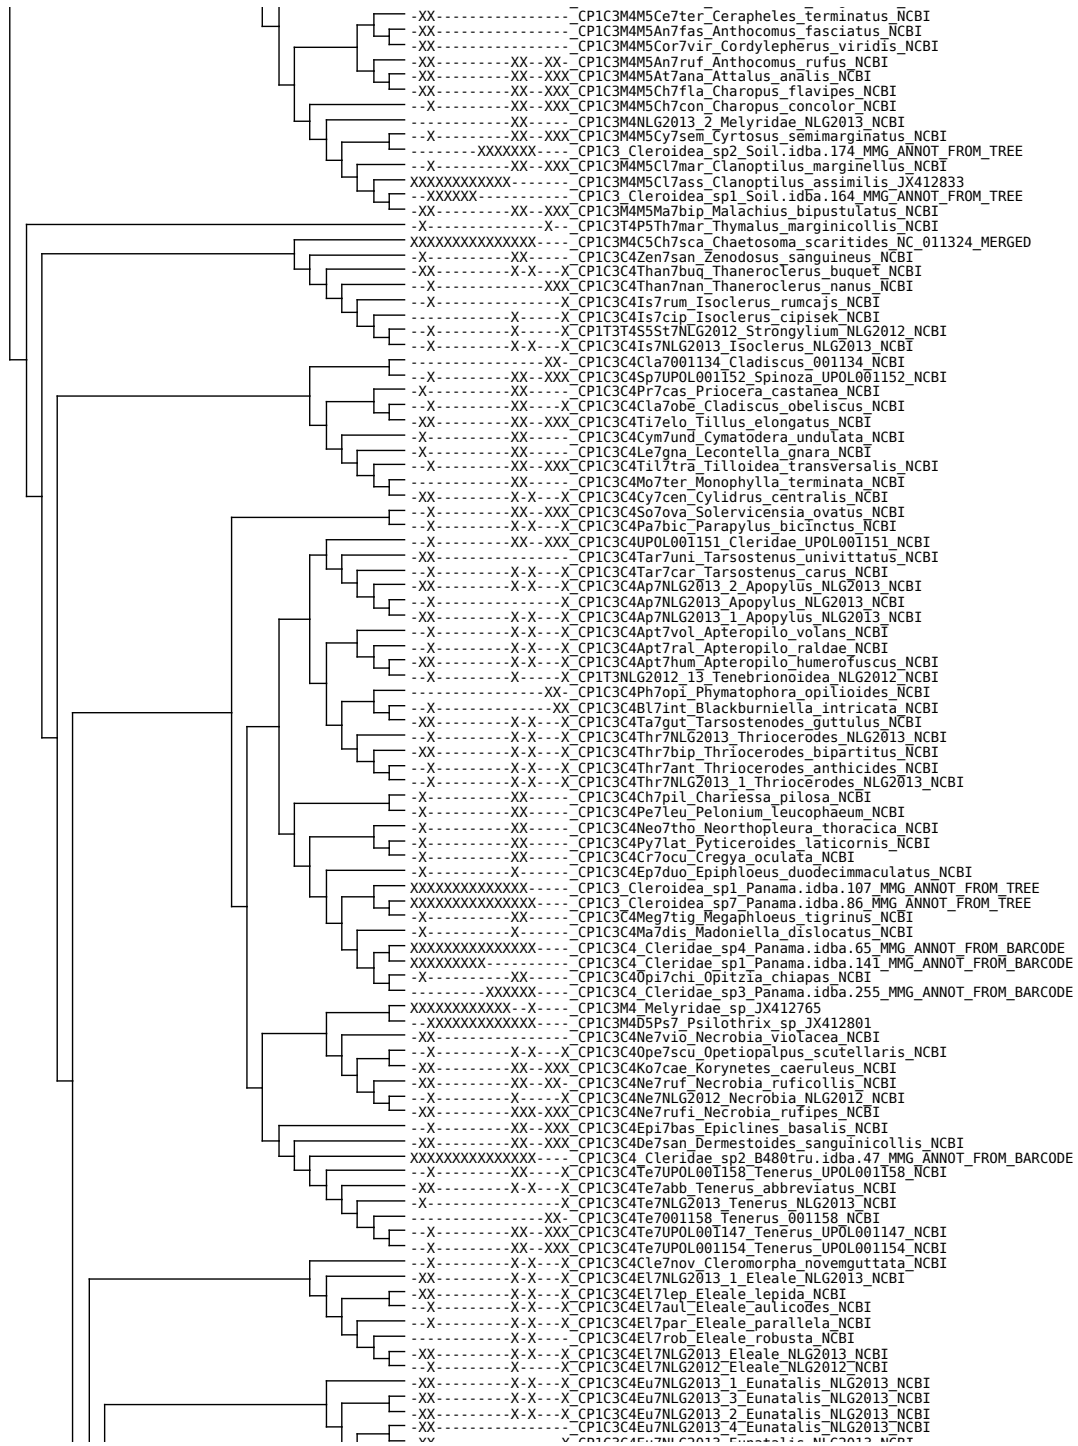

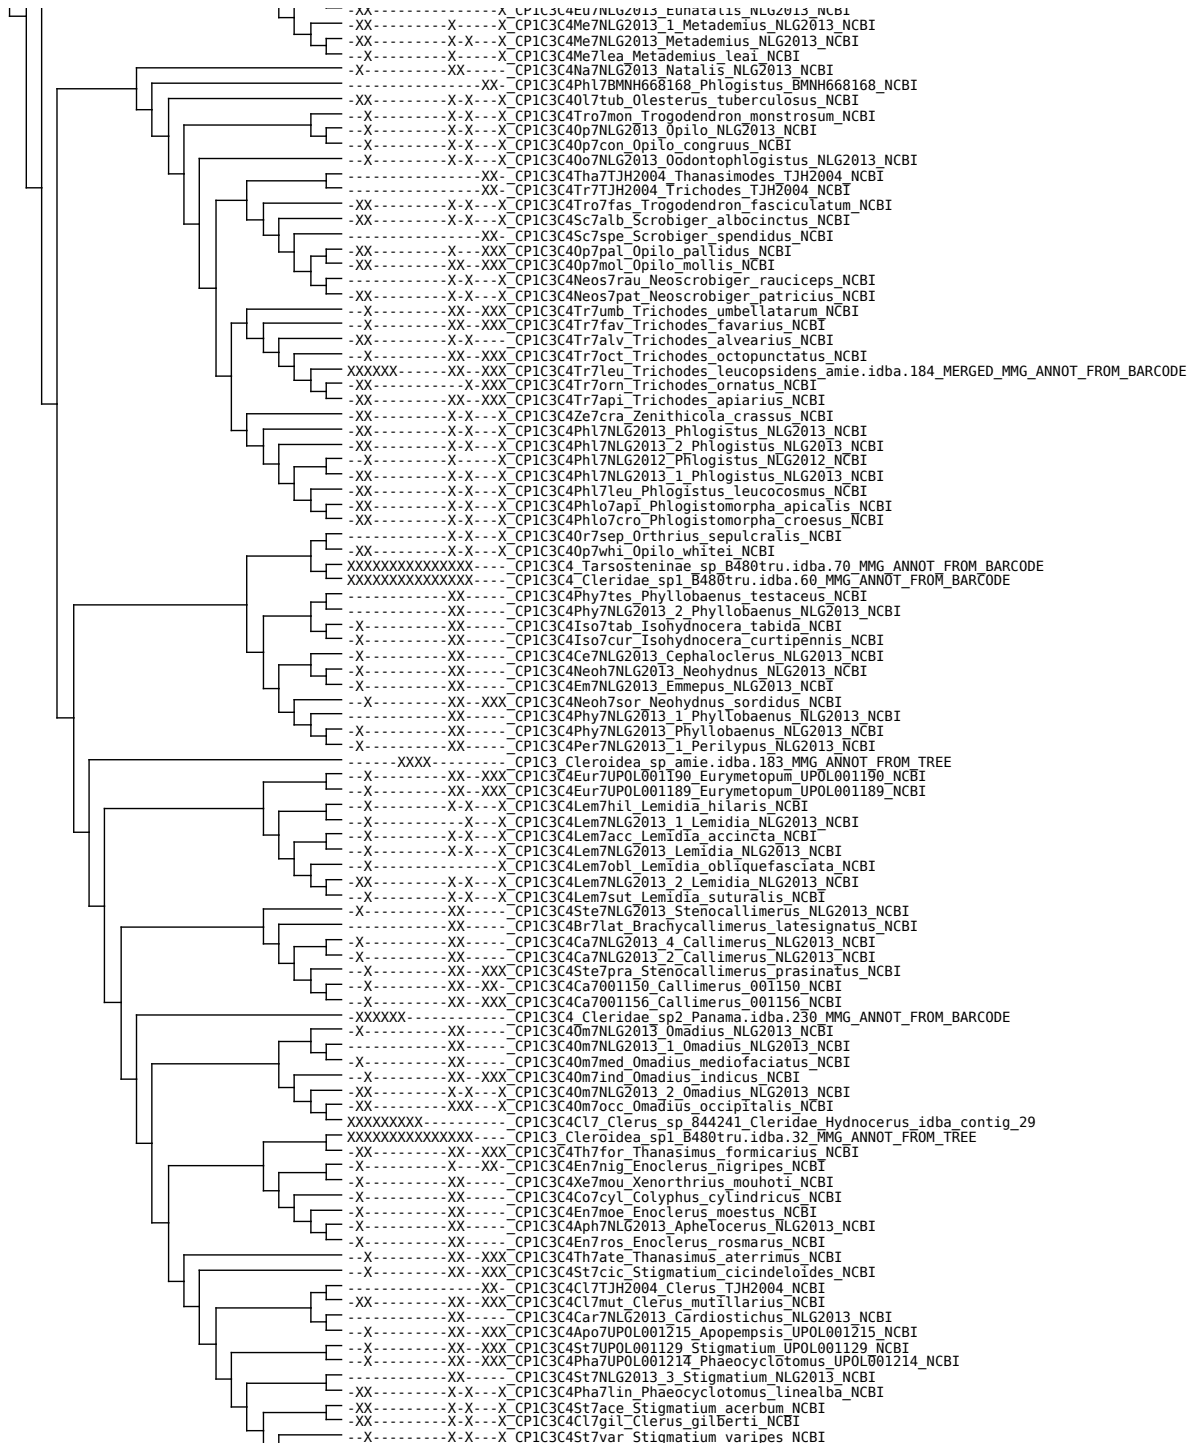

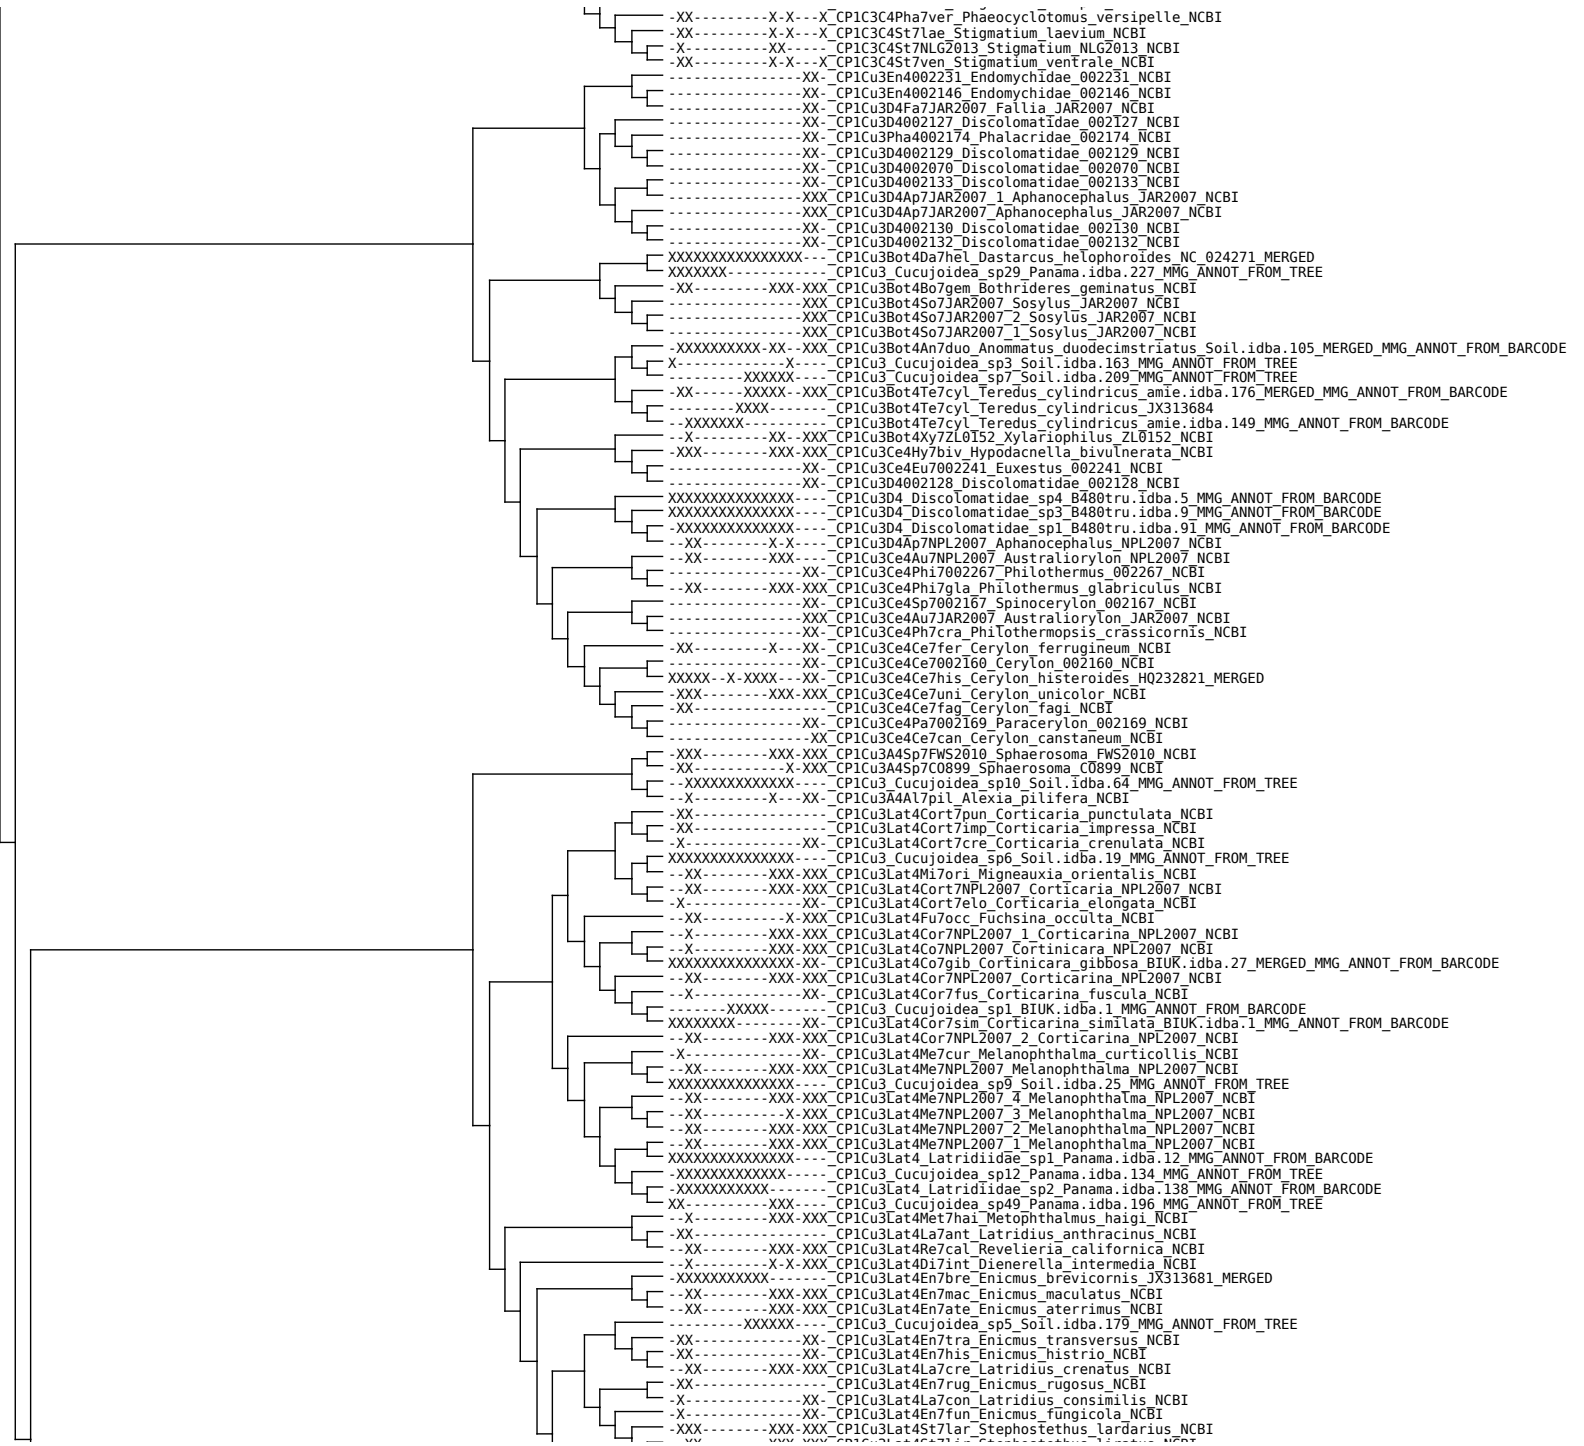



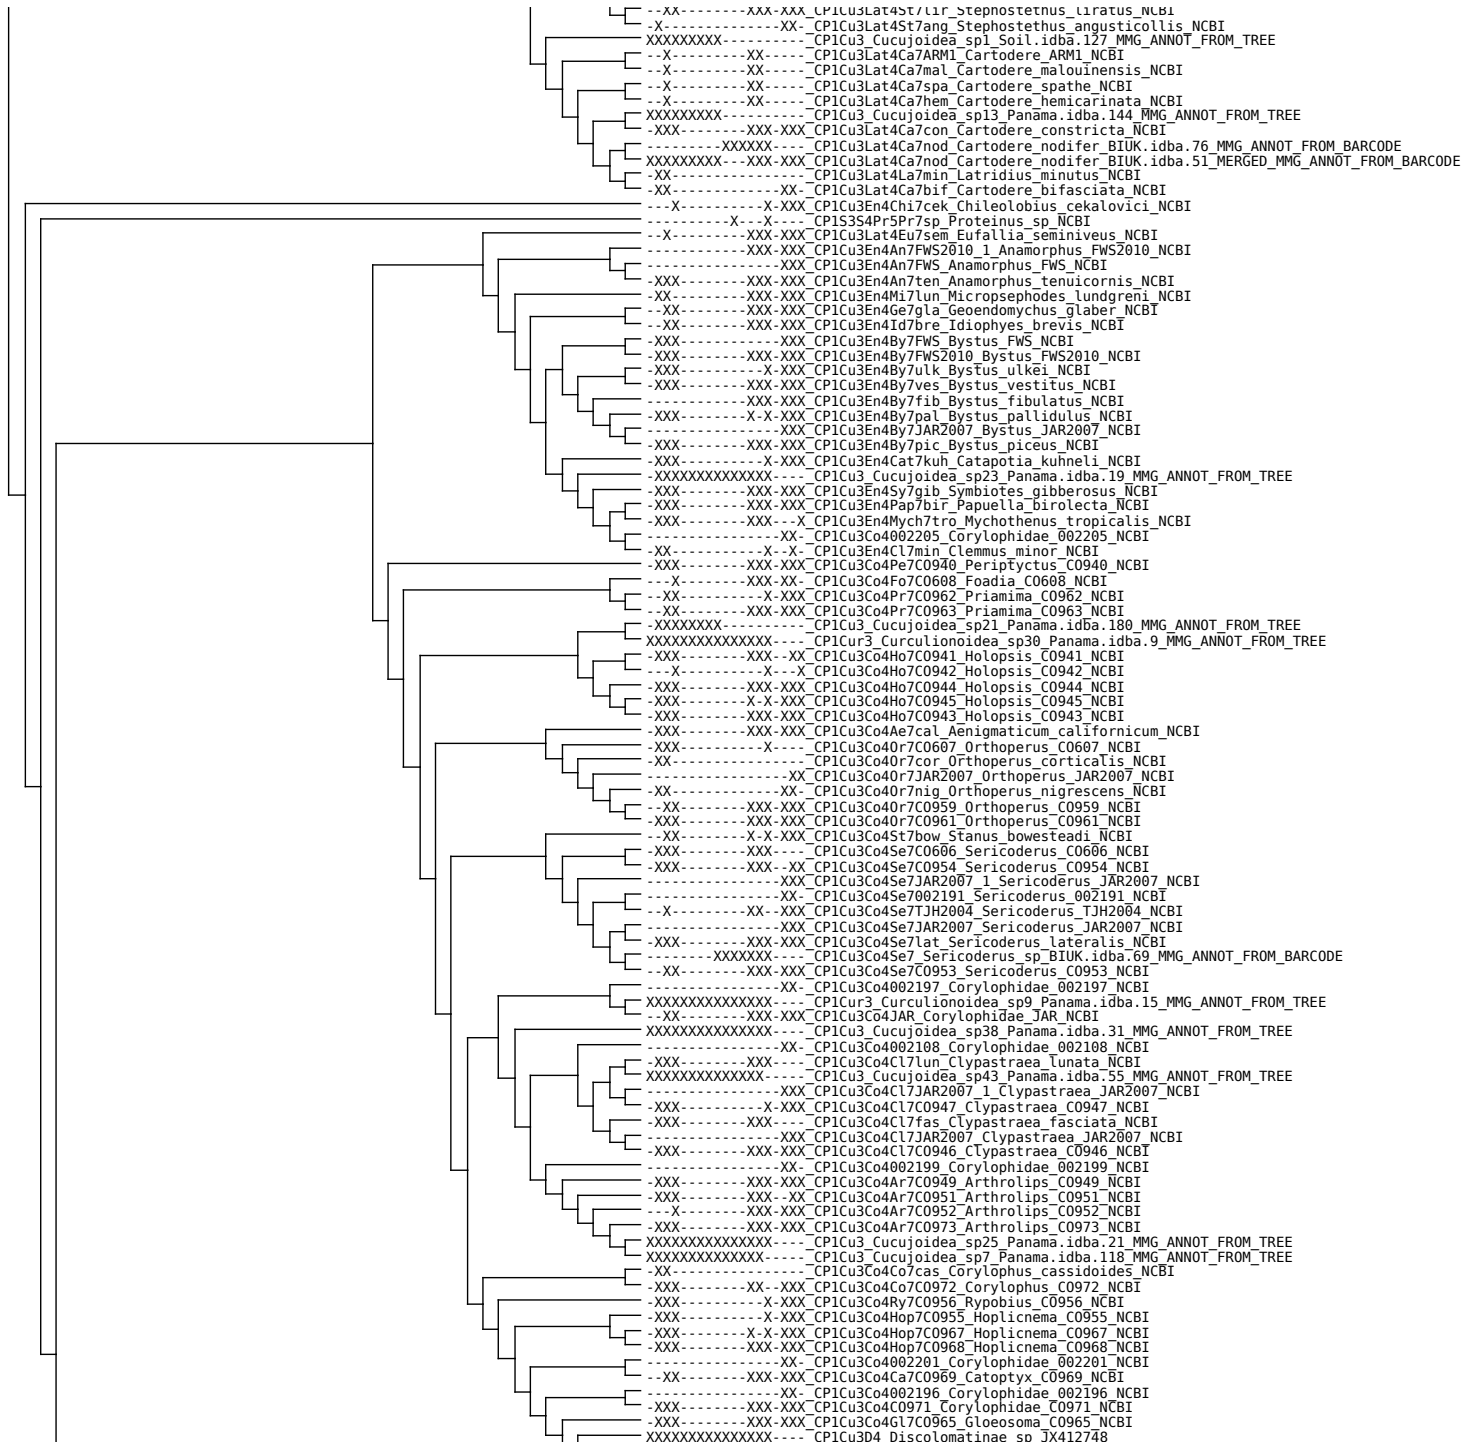

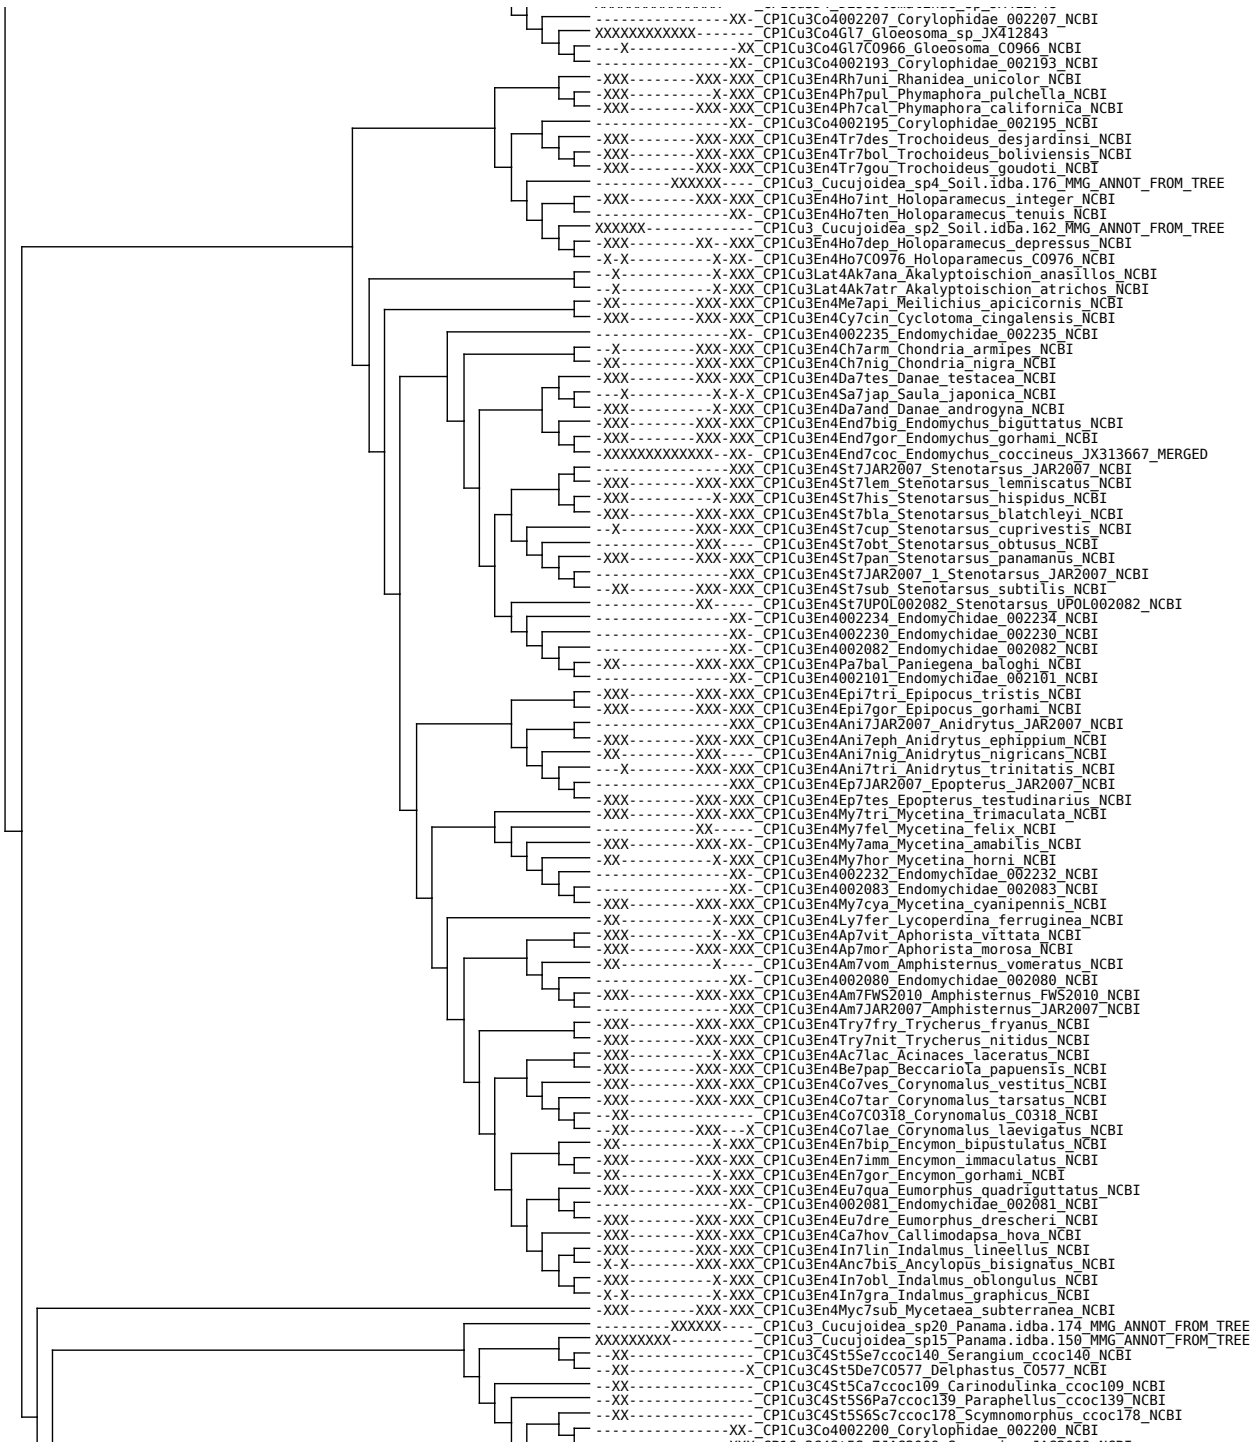



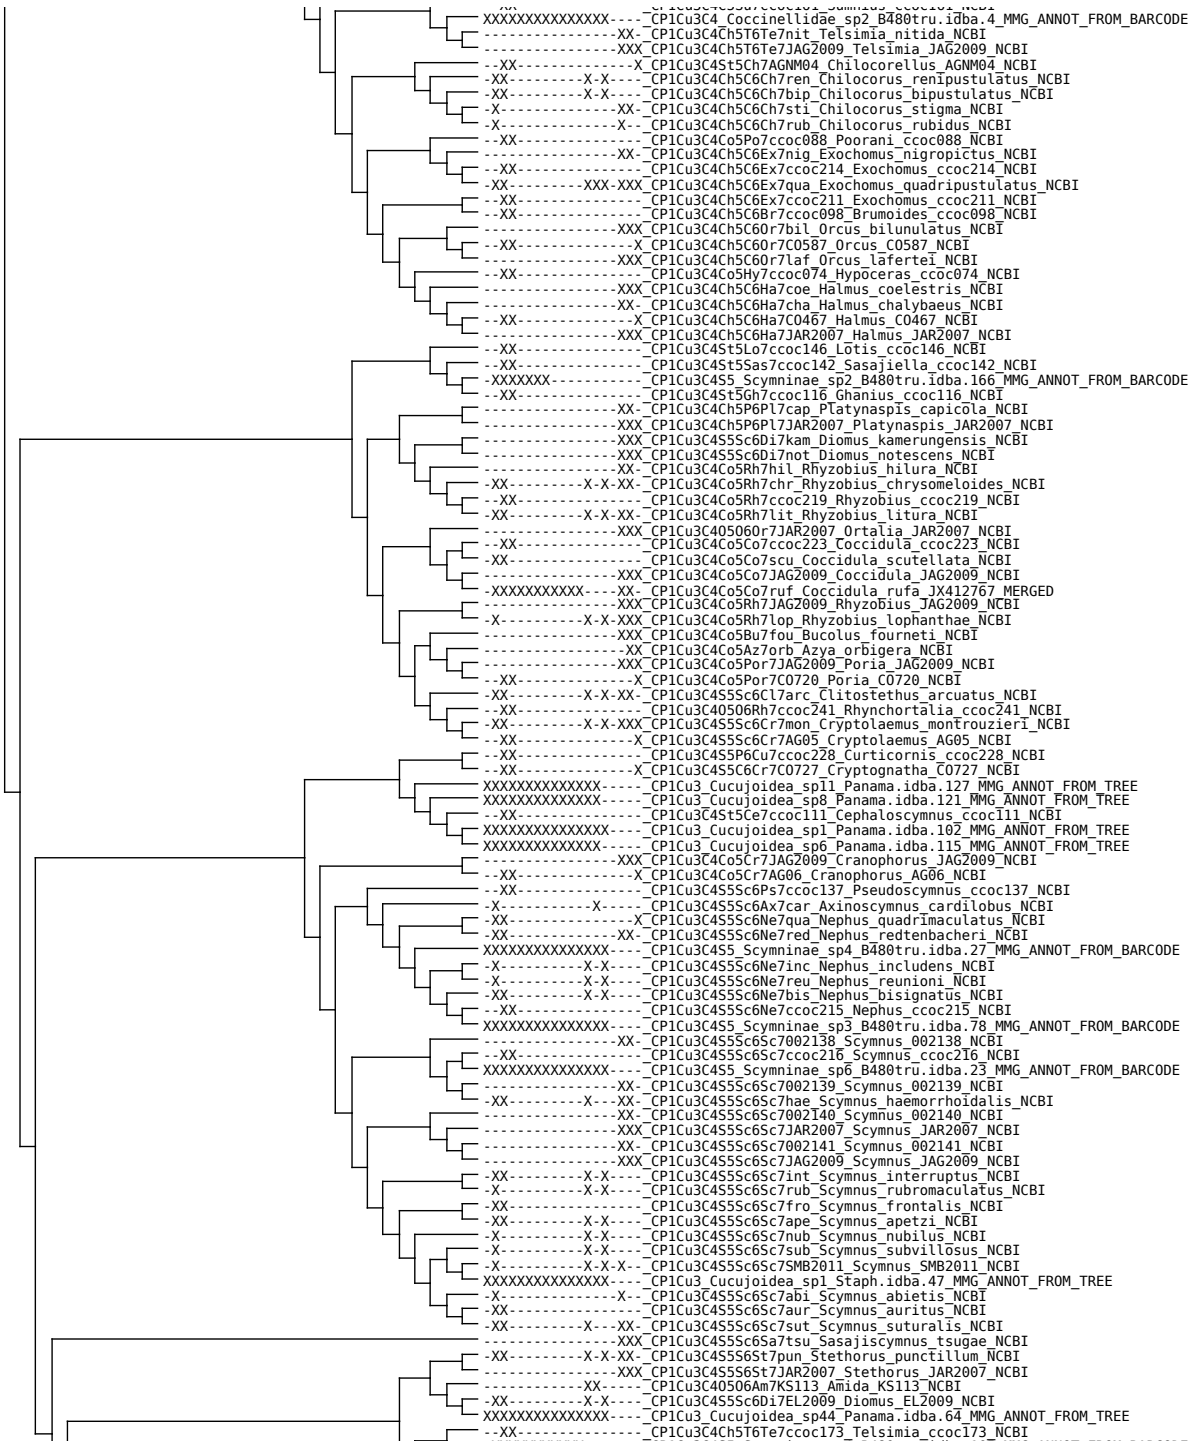

XXXXXXXXXXXXXXXXX--- CP1Cu3C4 Coccinellidae\_sp2\_B480tru.idba.4\_MMG\_ANNOT\_FROM\_BARCODE  
-----XX- CP1Cu3C4Ch5T6Te7nit Telsimia nitida NCBI  
-----XXX- CP1Cu3C4Ch5T6Te7JAG2009 Telsimia JAG2009 NCBI  
-----XX- CP1Cu3C4St5Ch7AGNM04 Chilocorellus AGNM04 NCBI  
-----XX- X-X- CP1Cu3C4Ch5C6Ch7ren Chilocorus renipustulatus NCBI  
-----XX- X-X- CP1Cu3C4Ch5C6Ch7bip Chilocorus bipustulatus NCBI  
-----X- CP1Cu3C4Ch5C6Ch7sti Chilocorus stigma NCBI  
-----X- CP1Cu3C4Ch5C6Ch7rub Chilocorus rubidus NCBI  
-----XX- CP1Cu3C4Co5Po7ccoc088 Poorani\_ccoc088 NCBI  
-----XX- CP1Cu3C4Ch5C6Ex7nig Exochomus nigropictus NCBI  
-----XX- CP1Cu3C4Ch5C6Ex7ccoc214 Exochomus\_ccoc214 NCBI  
-----XX- XXX- CP1Cu3C4Ch5C6Ex7qua Exochomus quadripustulatus NCBI  
-----XX- CP1Cu3C4Ch5C6Ex7ccoc211 Exochomus\_ccoc211 NCBI  
-----XX- CP1Cu3C4Ch5C6B7ccoc098 Brumoides\_ccoc098 NCBI  
-----XXX- CP1Cu3C4Ch5C60r7bil Orcus bilunulatus NCBI  
-----X- CP1Cu3C4Ch5C60r7C0587 Orcus C0587 NCBI  
-----XXX- CP1Cu3C4Ch5C60r7laf Orcus lafertei NCBI  
-----XX- CP1Cu3C4Co5Hy7ccoc074 Hypoceras\_ccoc074 NCBI  
-----XXX- CP1Cu3C4Ch5C6Ha7coe Halmus coelestris NCBI  
-----XX- CP1Cu3C4Ch5C6Ha7cha Halmus chalybaeus NCBI  
-----XX- X- CP1Cu3C4Ch5C6Ha7C0467 Halmus\_C0467 NCBI  
-----XXX- CP1Cu3C4Ch5C6Ha7JAR2007 Halmus\_JAR2007 NCBI  
-----XX- CP1Cu3C4St5Lo7ccoc146 Lotis\_ccoc146 NCBI  
-----XX- CP1Cu3C4St5Sas7ccoc142 Sasajiella\_ccoc142 NCBI  
-----XXXXXXXX- CP1Cu3C4S5 Scymninae\_sp2\_B480tru.idba.166\_MMG\_ANNOT\_FROM\_BARCODE  
-----XX- CP1Cu3C4St5Gh7ccoc116 Ghanius\_ccoc116 NCBI  
-----XX- CP1Cu3C4Ch5P6P17cap Platynaspis capicola NCBI  
-----XXX- CP1Cu3C4Ch5P6P17JAR2007 Platynaspis\_JAR2007 NCBI  
-----XXX- CP1Cu3C4S5Sc6D17kam Diomus kamerungensis NCBI  
-----XXX- CP1Cu3C4S5Sc6D17not Diomus notescens NCBI  
-----XX- CP1Cu3C4Co5Rh7hil Rhyzobius hilura NCBI  
-----XX- X-X-XX- CP1Cu3C4Co5Rh7chr Rhyzobius chrysoloides NCBI  
-----XX- CP1Cu3C4Co5Rh7ccoc219 Rhyzobius\_ccoc219 NCBI  
-----XX- X-X-XX- CP1Cu3C4Co5Rh7lit Rhyzobius litura NCBI  
-----XXX- CP1Cu3C4Co5O60r7JAR2007 OrtaLia\_JAR2007 NCBI  
-----XX- CP1Cu3C4Co5Co7ccoc223 Coccidula\_ccoc223 NCBI  
-----XX- CP1Cu3C4Co5Co7scu Coccidula scutellata NCBI  
-----XXX- CP1Cu3C4Co5Co7JAG2009 Coccidula\_JAG2009 NCBI  
-----XXXXXXXXXXXX- XX- CP1Cu3C4Co5Co7ruf Coccidula rufa\_JX412767 MERGED  
-----XXX- CP1Cu3C4Co5Rh7JAG2009 Rhyzobius\_JAG2009 NCBI  
-----X-X-XXX- CP1Cu3C4Co5Rh7lop Rhyzobius lophanthae NCBI  
-----XXX- CP1Cu3C4Co5Bu7fou Bucolus fourneti NCBI  
-----XX- CP1Cu3C4Co5Az7orb Azya orbigeri NCBI  
-----XXX- CP1Cu3C4Co5Por7JAG2009 Poria\_JAG2009 NCBI  
-----X- CP1Cu3C4Co5Por7C0720 Poria\_C0720 NCBI  
-----XX- X-X-XX- CP1Cu3C4S5Sc6Cl7arc Clitostethus arcuatus NCBI  
-----XX- CP1Cu3C4Co5O6Rh7ccoc241 Rhynchortalia\_ccoc241 NCBI  
-----XX- X-X-XXX- CP1Cu3C4S5Sc6Cr7mon Cryptolaemus montrozouieri NCBI  
-----XX- X- CP1Cu3C4S5Sc6Cr7AG05 Cryptolaemus AG05 NCBI  
-----XX- CP1Cu3C4S5P6Cu7ccoc228 Curticorinis\_ccoc228 NCBI  
-----XX- X- CP1Cu3C4S5C6Cr7C0727 Cryptognatha\_C0727 NCBI  
-----XXXXXXXXXXXX- CP1Cu3 Cucujoidea\_sp1 Panama.idba.127\_MMG\_ANNOT\_FROM\_TREE  
-----XXXXXXXXXXXX- CP1Cu3 Cucujoidea\_sp8 Panama.idba.121\_MMG\_ANNOT\_FROM\_TREE  
-----XXXXXXXXXXXX- CP1Cu3C4St5Ce7ccoc111 Cephaloscymnus\_ccoc111 NCBI  
-----XXXXXXXXXXXX- CP1Cu3 Cucujoidea\_sp1 Panama.idba.102\_MMG\_ANNOT\_FROM\_TREE  
-----XXXXXXXXXXXX- CP1Cu3 Cucujoidea\_sp6 Panama.idba.115\_MMG\_ANNOT\_FROM\_TREE  
-----XXX- CP1Cu3C4Co5Cr7JAG2009 Cranophorus\_JAG2009 NCBI  
-----X- CP1Cu3C4Co5Cr7AG06 Cranophorus\_AG06 NCBI  
-----XX- CP1Cu3C4S5Sc6Ps7ccoc137 Pseudoscymnus\_ccoc137 NCBI  
-----X- CP1Cu3C4S5Sc6Ax7car Axinoscymnus cardilobus NCBI  
-----XX- X- CP1Cu3C4S5Sc6Ne7qua Nephus quadrimaculatus NCBI  
-----XX- CP1Cu3C4S5Sc6Ne7red Nephus redtenbacheri NCBI  
-----XXXXXXXXXXXX- CP1Cu3C4S5 Scymninae\_sp4\_B480tru.idba.27\_MMG\_ANNOT\_FROM\_BARCODE  
-----X- X-X- CP1Cu3C4S5Sc6Ne7inc Nephus includens NCBI  
-----X- X-X- CP1Cu3C4S5Sc6Ne7reu Nephus reunioni NCBI  
-----XX- X-X- CP1Cu3C4S5Sc6Ne7bis Nephus bisignatus NCBI  
-----XX- CP1Cu3C4S5Sc6Ne7ccoc215 Nephus\_ccoc215 NCBI  
-----XXXXXXXXXXXX- CP1Cu3C4S5 Scymninae\_sp3\_B480tru.idba.70\_MMG\_ANNOT\_FROM\_BARCODE  
-----XX- XX- CP1Cu3C4S5Sc6S7002138 Scymnus\_002138 NCBI  
-----XX- CP1Cu3C4S5Sc6S7ccoc216 Scymnus\_ccoc216 NCBI  
-----XXXXXXXXXXXX- CP1Cu3C4S5 Scymninae\_sp6\_B480tru.idba.23\_MMG\_ANNOT\_FROM\_BARCODE  
-----XX- CP1Cu3C4S5Sc6S7002139 Scymnus\_002139 NCBI  
-----XX- X-XX- CP1Cu3C4S5Sc6S7hae Scymnus haemorrhoidalis NCBI  
-----XX- CP1Cu3C4S5Sc6S7002140 Scymnus\_002140 NCBI  
-----XXX- CP1Cu3C4S5Sc6S7JAR2007 Scymnus\_JAR2007 NCBI  
-----XX- CP1Cu3C4S5Sc6S7002141 Scymnus\_002141 NCBI  
-----XXX- CP1Cu3C4S5Sc6S7JAG2009 Scymnus\_JAG2009 NCBI  
-----XX- X-X- CP1Cu3C4S5Sc6S7int Scymnus interruptus NCBI  
-----X- X-X- CP1Cu3C4S5Sc6S7rub Scymnus rubromaculatus NCBI  
-----XX- CP1Cu3C4S5Sc6S7fro Scymnus frontalis NCBI  
-----XX- X-X- CP1Cu3C4S5Sc6S7ape Scymnus apetzii NCBI  
-----X- X-X- CP1Cu3C4S5Sc6S7nub Scymnus nubilus NCBI  
-----X- X-X- CP1Cu3C4S5Sc6S7sub Scymnus subvillosus NCBI  
-----X- X-X-X- CP1Cu3C4S5Sc6S7SMB2011 Scymnus\_SMB2011 NCBI  
-----XXXXXXXXXXXX- CP1Cu3 Cucujoidea\_sp1 Staph.idba.47\_MMG\_ANNOT\_FROM\_TREE  
-----X- X- CP1Cu3C4S5Sc6S7abi Scymnus abietis NCBI  
-----XX- CP1Cu3C4S5Sc6S7aur Scymnus auritus NCBI  
-----XX- X-XX- CP1Cu3C4S5Sc6S7sut Scymnus suturalis NCBI  
-----XXX- CP1Cu3C4S5Sc6S7tsu Sasajiscymnus tsugae NCBI  
-----XX- X-X-XX- CP1Cu3C4S5S6St7pun Stethorus punctillum NCBI  
-----XXX- CP1Cu3C4S5S6St7JAR2007 Stethorus\_JAR2007 NCBI  
-----XX- X- CP1Cu3C4Co5O6Am7KS113 Amida\_KS113 NCBI  
-----XX- X-X- CP1Cu3C4S5Sc6D17EL2009 Diomus\_EL2009 NCBI  
-----XXXXXXXXXXXX- CP1Cu3 Cucujoidea\_sp44 Panama.idba.64\_MMG\_ANNOT\_FROM\_TREE  
-----XX- CP1Cu3C4Ch5T6Te7ccoc173 Telsimia\_ccoc173 NCBI



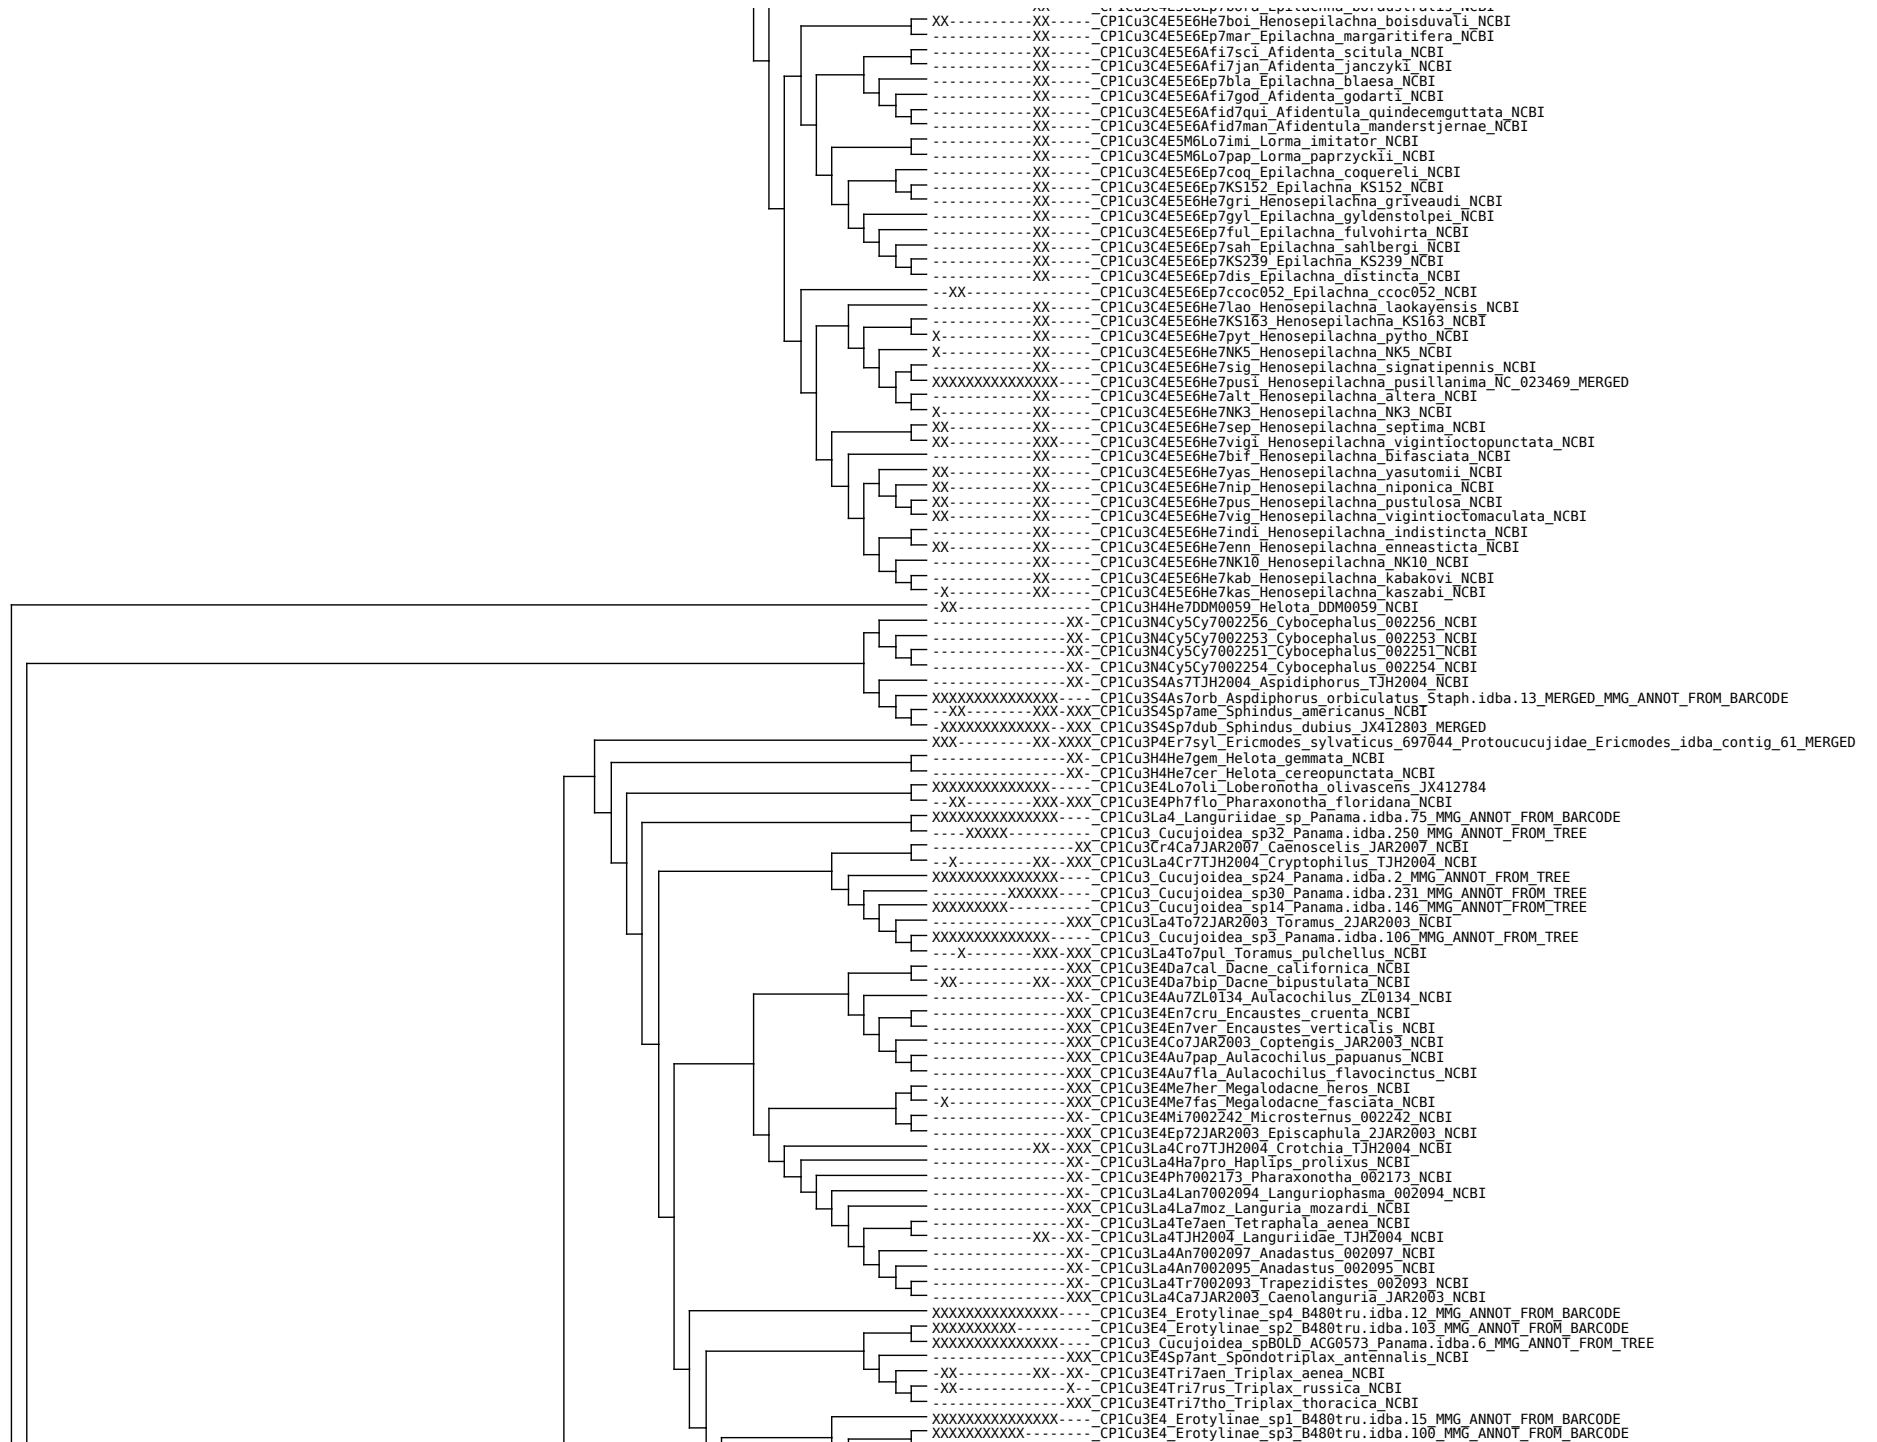

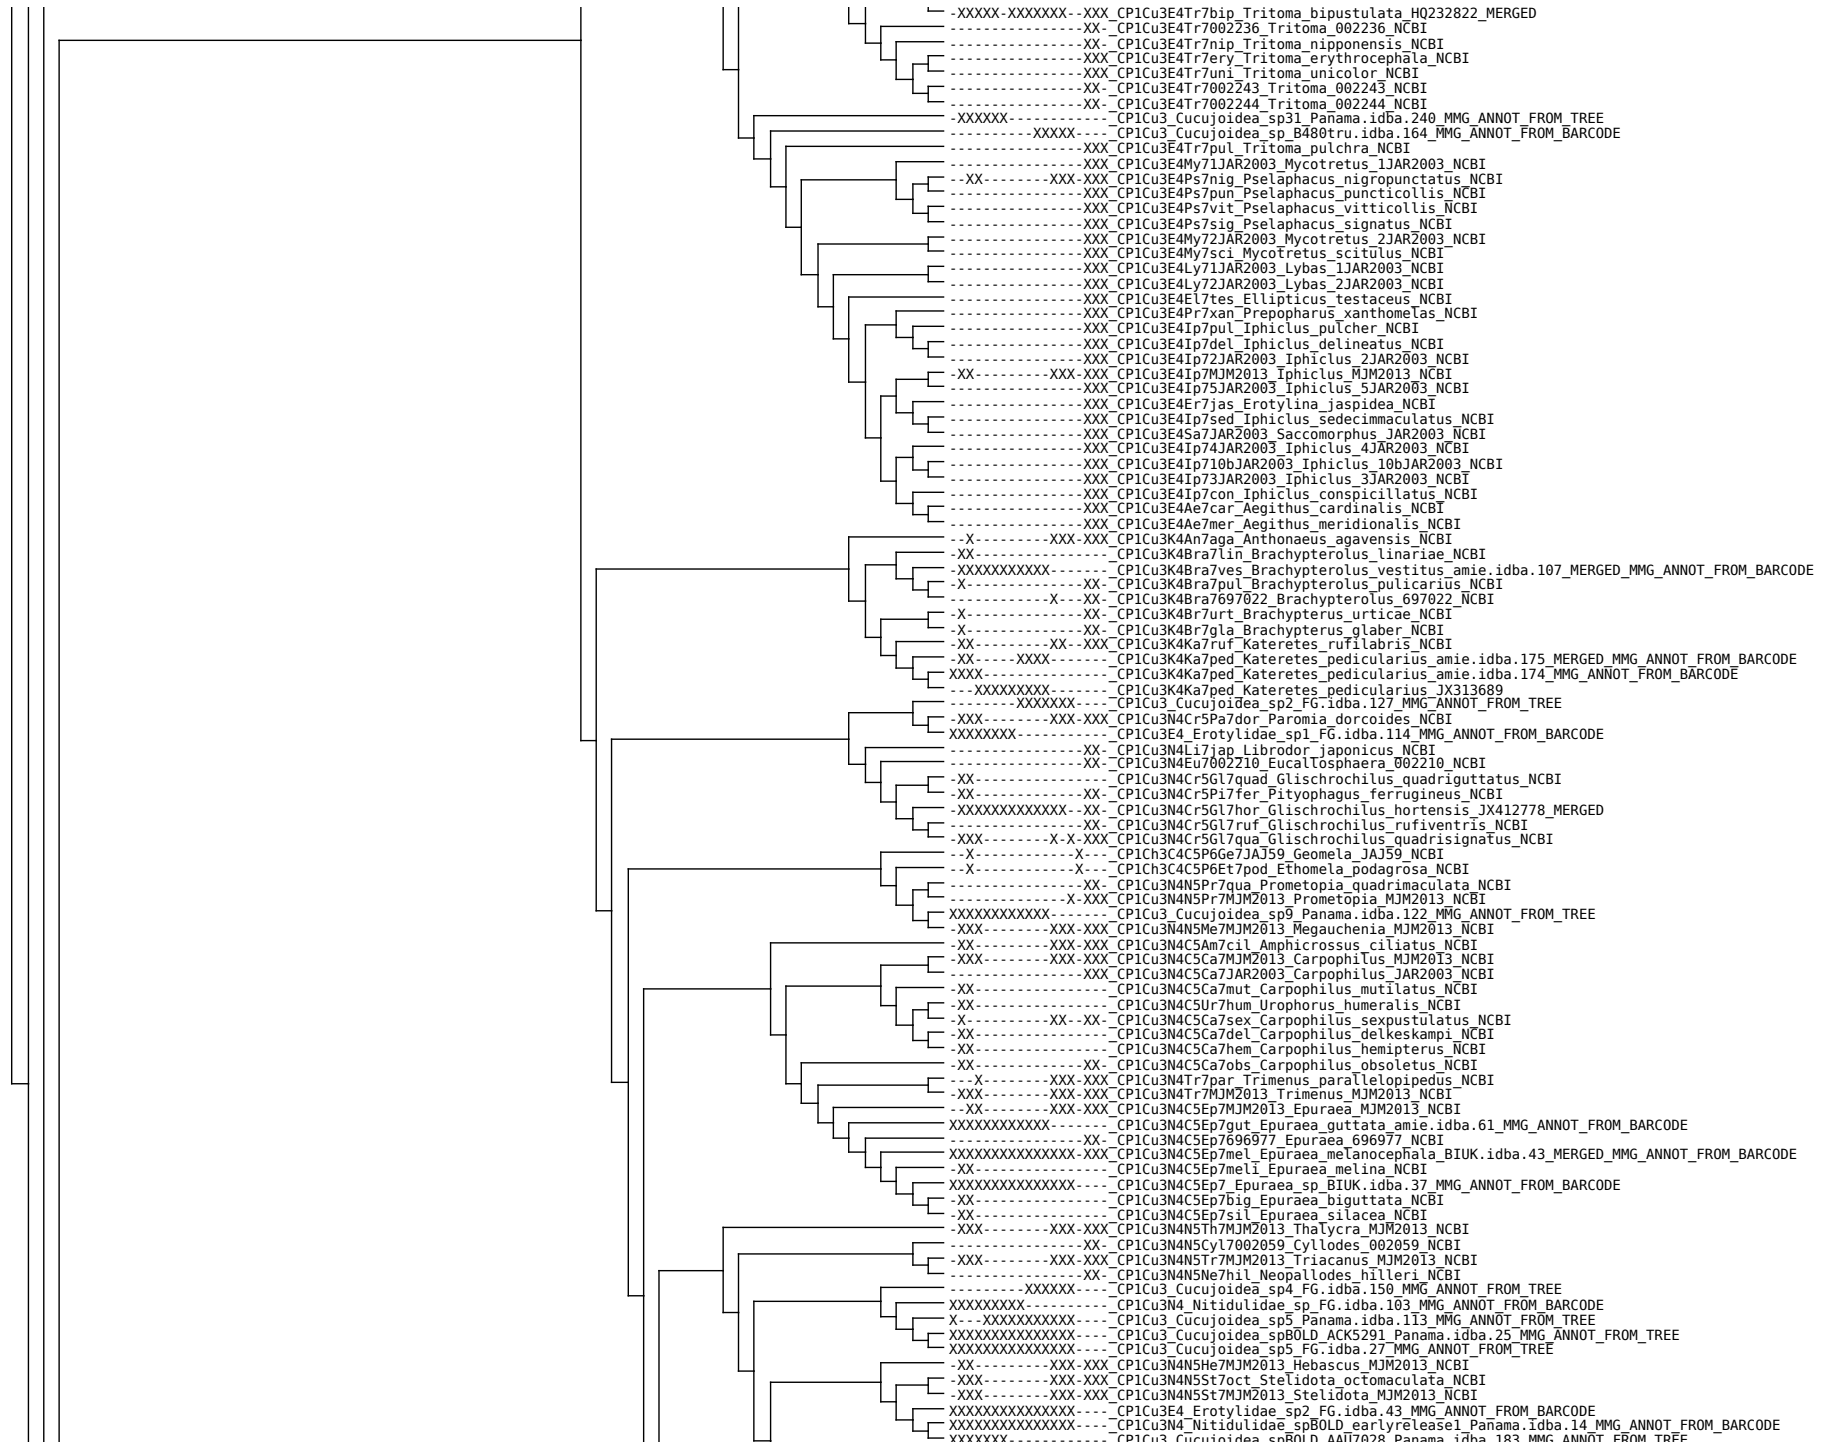

-----XXXX-XXXXXXX-XXX CP1Cu3E4Tr7bip Tritoma bipustulata HQ232822\_MERGED  
-----XX-CP1Cu3E4Tr7002236 Tritoma\_002236\_NCB1  
-----XX-CP1Cu3E4Tr7n1p Tritoma nipponensis\_NCB1  
-----XX-CP1Cu3E4Tr7ery Tritoma erythrocephala\_NCB1  
-----XX-CP1Cu3E4Tr7uni Tritoma unicolor\_NCB1  
-----XX-CP1Cu3E4Tr7002243 Tritoma\_002243\_NCB1  
-----XX-CP1Cu3E4Tr7002244 Tritoma\_002244\_NCB1  
-----XXXXX-CP1Cu3 Cucujoidea sp31 Panama.idba.240\_MMG\_ANNOT\_FROM\_TREE  
-----XXXXX-CP1Cu3 Cucujoidea sp\_B480tru.idba.164\_MMG\_ANNOT\_FROM\_BARCODE  
-----XX-CP1Cu3E4Tr7pul Tritoma pulchra\_NCB1  
-----XX-CP1Cu3E4My71JAR2003 Mycotretus\_1JAR2003\_NCB1  
-----XX-XXX-CP1Cu3E4Ps7nig Pselaphacus nigropunctatus\_NCB1  
-----XX-CP1Cu3E4Ps7pun Pselaphacus puncticollis\_NCB1  
-----XX-CP1Cu3E4Ps7vit Pselaphacus vitticollis\_NCB1  
-----XX-CP1Cu3E4Ps7sig Pselaphacus signatus\_NCB1  
-----XX-CP1Cu3E4My72JAR2003 Mycotretus\_2JAR2003\_NCB1  
-----XX-CP1Cu3E4My7sci Mycotretus scitulus\_NCB1  
-----XX-CP1Cu3E4Ly71JAR2003 Lybas\_1JAR2003\_NCB1  
-----XX-CP1Cu3E4Ly72JAR2003 Lybas\_2JAR2003\_NCB1  
-----XX-CP1Cu3E4El7tes Ellipticus testaceus\_NCB1  
-----XX-CP1Cu3E4Pr7xan Preopharus xanthomelas\_NCB1  
-----XX-CP1Cu3E4Ip7pul Iphiclus pulcher\_NCB1  
-----XX-CP1Cu3E4Ip7del Iphiclus delineaus\_NCB1  
-----XX-CP1Cu3E4Ip72JAR2003 Iphiclus\_2JAR2003\_NCB1  
-----XX-CP1Cu3E4Ip7MJM2013 Iphiclus\_MJM2013\_NCB1  
-----XX-CP1Cu3E4Ip75JAR2003 Iphiclus\_5JAR2003\_NCB1  
-----XX-CP1Cu3E4Er7jas Erotylina jaspidea\_NCB1  
-----XX-CP1Cu3E4Ip7sed Iphiclus sedecimmaculatus\_NCB1  
-----XX-CP1Cu3E4Sa7JAR2003 Saccomorphus\_JAR2003\_NCB1  
-----XX-CP1Cu3E4Ip74JAR2003 Iphiclus\_4JAR2003\_NCB1  
-----XX-CP1Cu3E4Ip710bJAR2003 Iphiclus\_10bJAR2003\_NCB1  
-----XX-CP1Cu3E4Ip73JAR2003 Iphiclus\_3JAR2003\_NCB1  
-----XX-CP1Cu3E4Ip7con Iphiclus conspiciatus\_NCB1  
-----XX-CP1Cu3E4Ae7car Aegithus cardinalis\_NCB1  
-----XX-CP1Cu3E4Ae7mer Aegithus meridionalis\_NCB1  
-----X-XXX-CP1Cu3K4A7aga Anthonaenus agavensis\_NCB1  
-----XX-CP1Cu3K4Bra7lin Brachypterolus linariae\_NCB1  
-----XXXXXXXXXX-CP1Cu3K4Bra7ves Brachypterolus vestitus.amie.idba.107\_MERGED\_MMG\_ANNOT\_FROM\_BARCODE  
-----X-CP1Cu3K4Bra7pul Brachypterolus pulicarius\_NCB1  
-----X-XX-CP1Cu3K4Bra7697022 Brachypterolus\_697022\_NCB1  
-----X-CP1Cu3K4Br7urt Brachypterolus urticae\_NCB1  
-----X-XX-CP1Cu3K4Br7gla Brachypterolus glaber\_NCB1  
-----XX-XX-CP1Cu3K4Ka7ruf Kateretes rufilabris\_NCB1  
-----XX-CP1Cu3K4Ka7ped Kateretes pedicularius.amie.idba.175\_MERGED\_MMG\_ANNOT\_FROM\_BARCODE  
-----XXXX-CP1Cu3K4Ka7ped Kateretes pedicularius.amie.idba.174\_MMG\_ANNOT\_FROM\_BARCODE  
-----XXXXXXXXXX-CP1Cu3K4Ka7ped Kateretes pedicularius\_JX313689  
-----XXXXXXXXXX-CP1Cu3 Cucujoidea sp2\_FG.idba.127\_MMG\_ANNOT\_FROM\_TREE  
-----XXX-XXX-CP1Cu3N4Cr5Pa7dor Paromia dorcoides\_NCB1  
-----XXXXXXXXXX-CP1Cu3E4 Erotylidae sp1\_FG.idba.114\_MMG\_ANNOT\_FROM\_BARCODE  
-----XX-CP1Cu3N4Li7jap Librodor japonicus\_NCB1  
-----XX-CP1Cu3N4Eu7002210 Eucaltosphaera\_002210\_NCB1  
-----XX-CP1Cu3N4Cr5G7quad Glischrochilus quadriguttatus\_NCB1  
-----XX-CP1Cu3N4Cr5P17fer Ptyophagus ferrugineus\_NCB1  
-----XXXXXXXXXX-CP1Cu3N4Cr5G7hor Glischrochilus hortensis\_JX412778\_MERGED  
-----XX-CP1Cu3N4Cr5G7ruf Glischrochilus rufiventris\_NCB1  
-----X-X-XXX-CP1Cu3N4Cr5G7qua Glischrochilus quadrisignatus\_NCB1  
-----X-CP1Ch3C4C5P6Ge7JAJ59 Geomela\_JAJ59\_NCB1  
-----X-CP1Ch3C4C5P6Et7pod Ethomela podagrosa\_NCB1  
-----XX-CP1Cu3N4N5Pr7qua Prometopia quadrimaculata\_NCB1  
-----X-XXX-CP1Cu3N4N5Pr7MJM2013 Prometopia\_MJM2013\_NCB1  
-----XXXXXXXXXX-CP1Cu3 Cucujoidea sp9 Panama.idba.122\_MMG\_ANNOT\_FROM\_TREE  
-----XXX-XXX-CP1Cu3N4N5Me7MJM2013 Megauchenia\_MJM2013\_NCB1  
-----XX-XXX-CP1Cu3N4C5Am7cil Amphicrossus ciliatus\_NCB1  
-----XXX-XXX-CP1Cu3N4C5Ca7MJM2013 Carpophilus\_MJM2013\_NCB1  
-----XXX-CP1Cu3N4C5Ca7JAR2003 Carpophilus\_JAR2003\_NCB1  
-----XX-CP1Cu3N4C5Ca7mut Carpophilus mutilatus\_NCB1  
-----XX-CP1Cu3N4C5Ur7hum Urophorus humeralis\_NCB1  
-----X-XX-XX-CP1Cu3N4C5Ca7sex Carpophilus sexpustulatus\_NCB1  
-----XX-CP1Cu3N4C5Ca7del Carpophilus delkeskampi\_NCB1  
-----XX-CP1Cu3N4C5Ca7hem Carpophilus hemipterus\_NCB1  
-----XX-CP1Cu3N4C5Ca7obs Carpophilus obsoletus\_NCB1  
-----X-XXX-CP1Cu3N4Tr7par Trimenus parallelipedus\_NCB1  
-----XXX-XXX-CP1Cu3N4Tr7MJM2013 Trimenus\_MJM2013\_NCB1  
-----XX-XXX-CP1Cu3N4C5Ep7MJM2013 Epuraea\_MJM2013\_NCB1  
-----XXXXXXXXXX-CP1Cu3N4C5Ep7gut Epuraea guttata.amie.idba.61\_MMG\_ANNOT\_FROM\_BARCODE  
-----XX-CP1Cu3N4C5Ep7696977 Epuraea\_696977\_NCB1  
-----XXXXXXXXXXXXXXXX-CP1Cu3N4C5Ep7mel Epuraea metanocephala\_BIUK.idba.43\_MERGED\_MMG\_ANNOT\_FROM\_BARCODE  
-----XX-CP1Cu3N4C5Ep7meli Epuraea melina\_NCB1  
-----XXXXXXXXXXXXXXXX-CP1Cu3N4C5Ep7 Epuraea sp\_BIUK.idba.37\_MMG\_ANNOT\_FROM\_BARCODE  
-----XX-CP1Cu3N4C5Ep7big Epuraea biguttata\_NCB1  
-----XX-CP1Cu3N4C5Ep7sil Epuraea silacea\_NCB1  
-----XXX-XXX-CP1Cu3N4N5Th7MJM2013 Thalydra\_MJM2013\_NCB1  
-----XX-CP1Cu3N4N5Cyl7002059 Cylloides\_002059\_NCB1  
-----XXX-XXX-CP1Cu3N4N5Tr7MJM2013 Triacanus\_MJM2013\_NCB1  
-----XX-CP1Cu3N4N5Ne7hil Neopallodes hilleri\_NCB1  
-----XXXXXX-CP1Cu3 Cucujoidea sp4\_FG.idba.150\_MMG\_ANNOT\_FROM\_TREE  
-----XXXXXXXXXX-CP1Cu3N4 Nitidulidae sp\_FG.idba.103\_MMG\_ANNOT\_FROM\_BARCODE  
-----X-XXXXXXXXXXXX-CP1Cu3 Cucujoidea sp5\_Panama.idba.113\_MMG\_ANNOT\_FROM\_TREE  
-----XXXXXXXXXXXXXXXX-CP1Cu3 Cucujoidea spBOLD\_ACK5291\_Panama.idba.25\_MMG\_ANNOT\_FROM\_TREE  
-----XXXXXXXXXXXXXXXX-CP1Cu3 Cucujoidea sp5\_FG.idba.27\_MMG\_ANNOT\_FROM\_TREE  
-----XX-XXX-CP1Cu3N4N5He7MJM2013 Hebascus\_MJM2013\_NCB1  
-----XXX-XXX-CP1Cu3N4N5St7oct Stelidota octomaculata\_NCB1  
-----XXX-XXX-CP1Cu3N4N5St7MJM2013 Stelidota\_MJM2013\_NCB1  
-----XXXXXXXXXXXXXXXX-CP1Cu3E4 Erotylidae sp2\_FG.idba.43\_MMG\_ANNOT\_FROM\_BARCODE  
-----XXXXXXXXXXXXXXXX-CP1Cu3N4 Nitidulidae spBOLD\_earlyreleae1\_Panama.idba.14\_MMG\_ANNOT\_FROM\_BARCODE  
-----XXXXXXXX-CP1Cu3 Cucujoidea spRND\_4AII7028\_Panama.idba.183\_MMG\_ANNOT\_FROM\_TREE







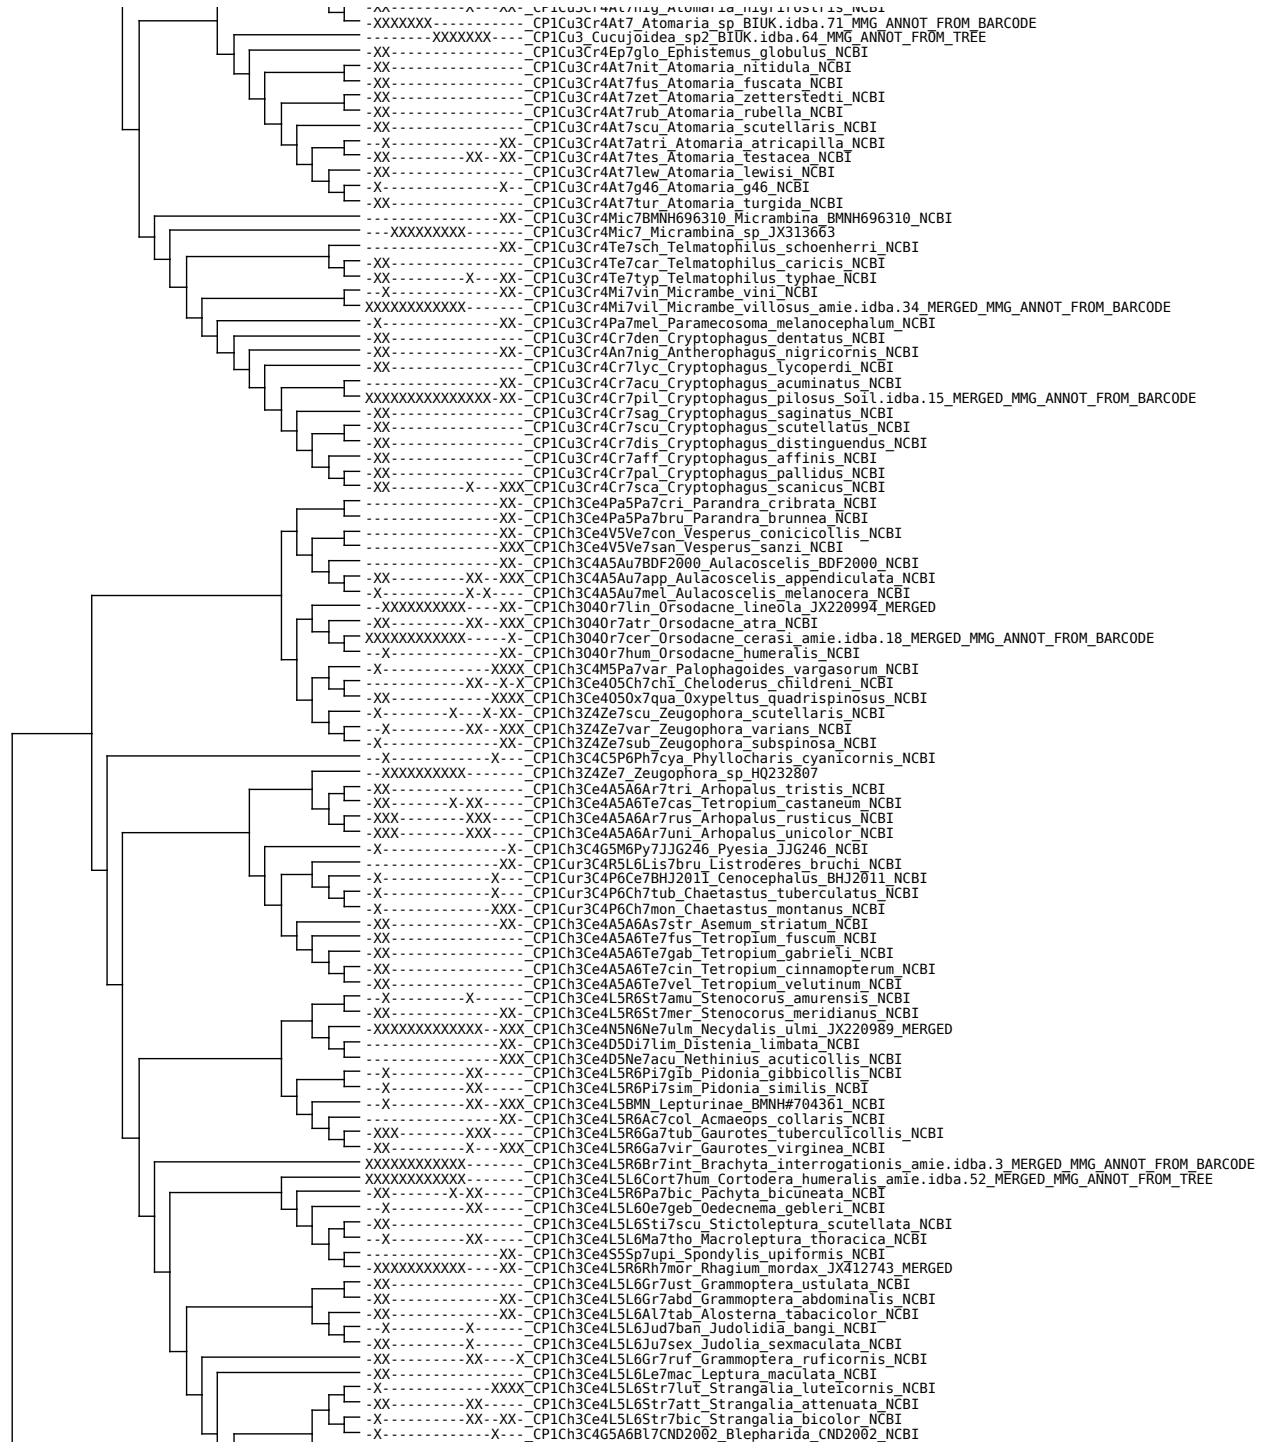

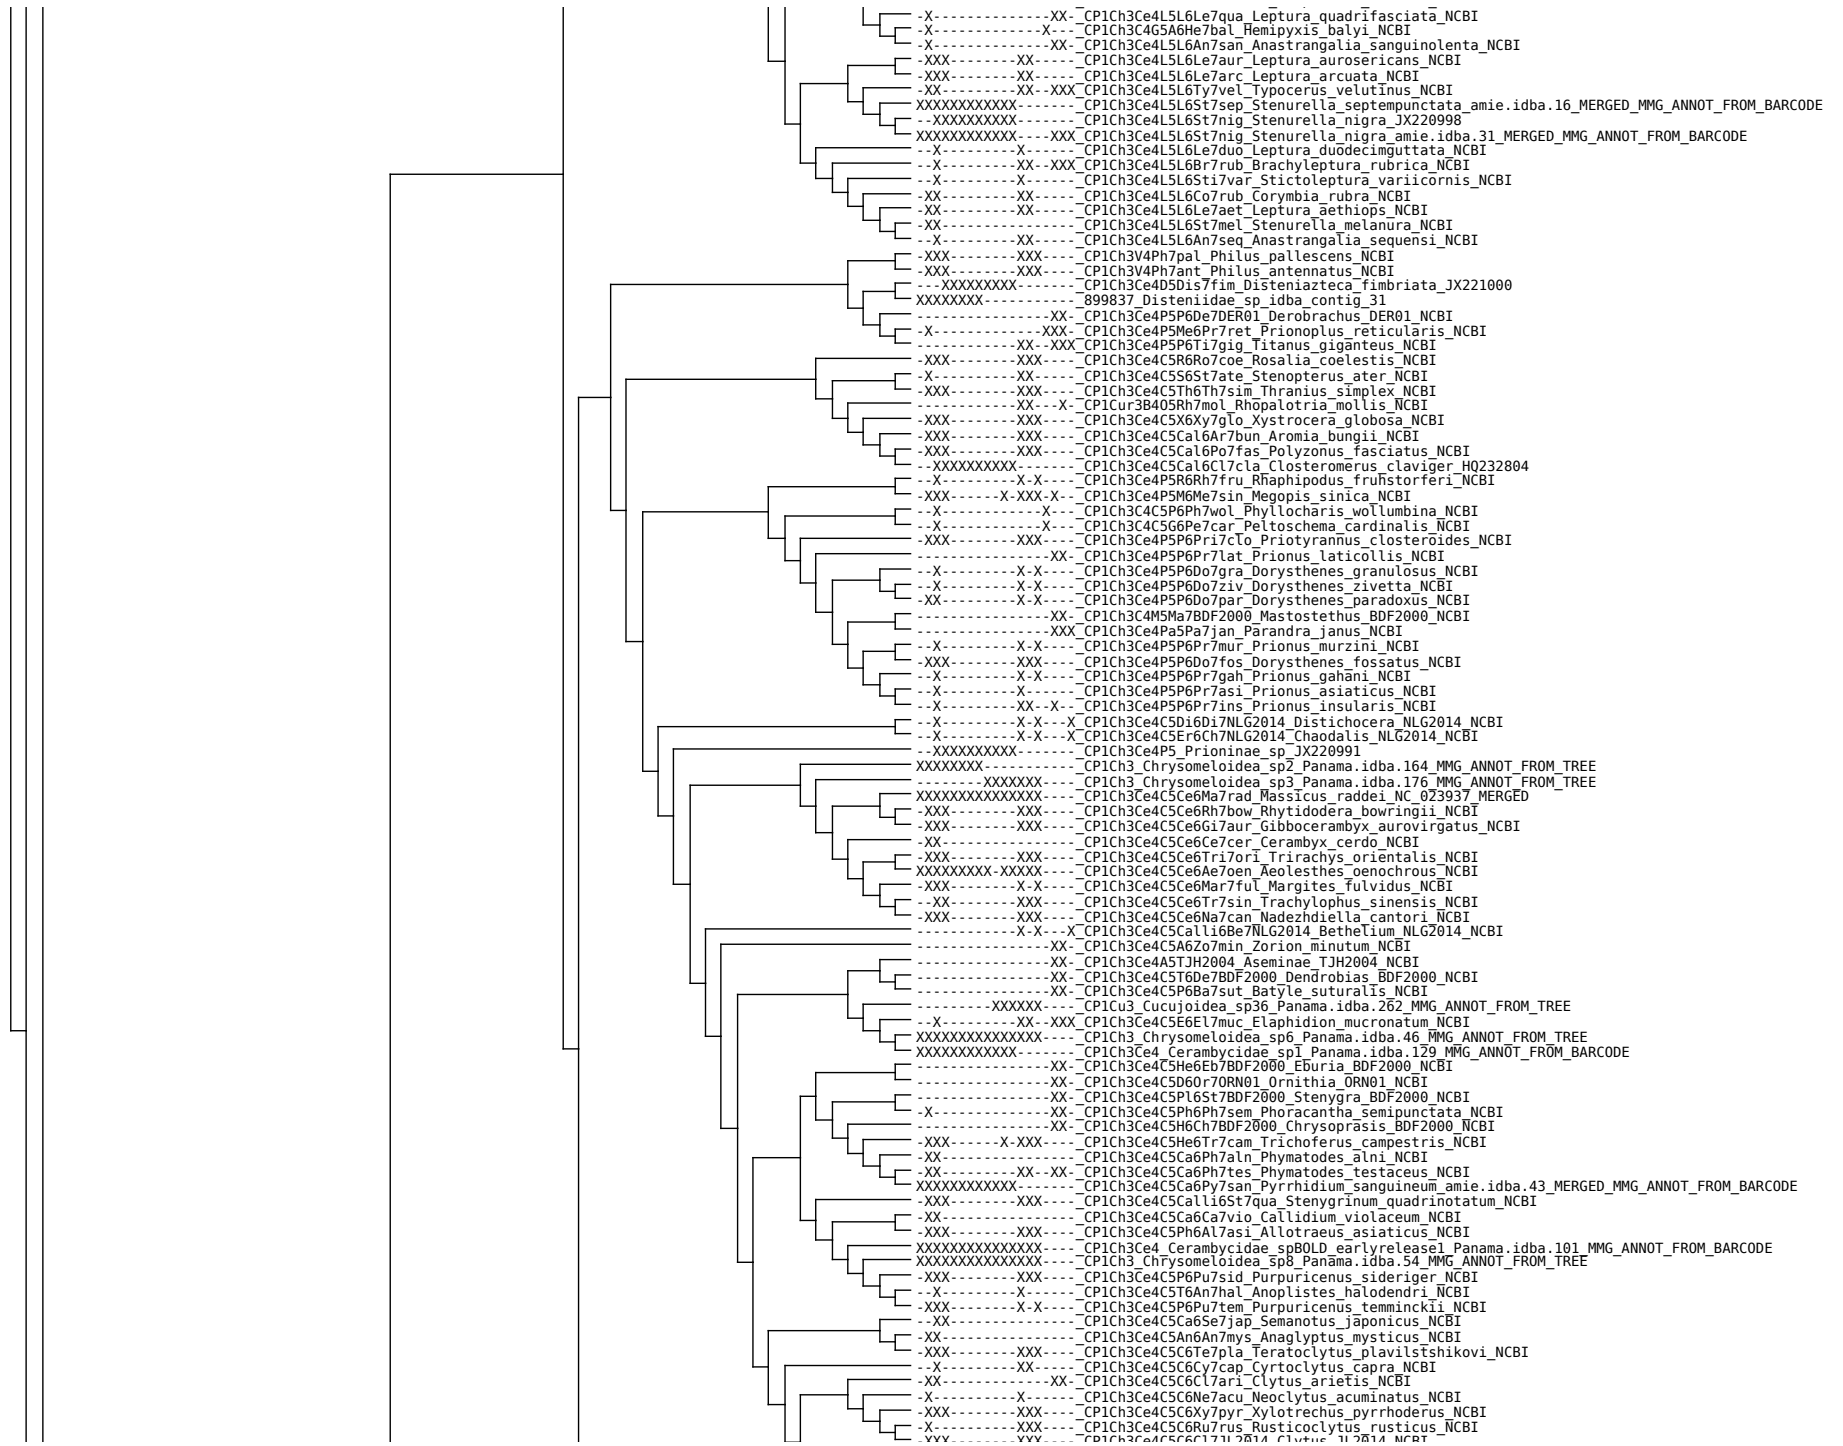

XX-CP1Ch3Ce4L5L6Le7qua Leptura quadrifasciata NCBI  
X-CP1Ch3Ce4L5L6Le7qua Hemipyxis balyi NCBI  
XX-CP1Ch3Ce4L5L6An7san Anastrangalia sanguinolenta NCBI  
XXX-CP1Ch3Ce4L5L6Le7aur Leptura aurosericans NCBI  
XXX-CP1Ch3Ce4L5L6Le7arc Leptura arcuata NCBI  
XX-CP1Ch3Ce4L5L6T7ve1 Typocerus velutinus NCBI  
XXXXXXXXXX-CP1Ch3Ce4L5L6T7sep Stenurella septempunctata amie.idba.16\_MERGED\_MMG\_ANNOT\_FROM\_BARCODE  
XXXXXXXXXX-CP1Ch3Ce4L5L6T7nig Stenurella nigra JX220998  
XXXXXXXXXX-CP1Ch3Ce4L5L6T7nig Stenurella nigra amie.idba.31\_MERGED\_MMG\_ANNOT\_FROM\_BARCODE  
X-CP1Ch3Ce4L5L6Le7duo Leptura duodecinguttata NCBI  
X-CP1Ch3Ce4L5L6Br7rub Brachyleptura rubrica NCBI  
X-CP1Ch3Ce4L5L6Sti7var Stictoleptura varicornis NCBI  
XX-CP1Ch3Ce4L5L6Co7rub Corymbia rubra NCBI  
XX-CP1Ch3Ce4L5L6Le7aet Leptura aethiops NCBI  
XX-CP1Ch3Ce4L5L6St7mel Stenurella melanura NCBI  
X-CP1Ch3Ce4L5L6An7seq Anastrangalia sequensi NCBI  
XXX-CP1Ch3V4Ph7pal Philus pallens NCBI  
XXX-CP1Ch3V4Ph7ant Philus antennatus NCBI  
XXXXXXXXXX-CP1Ch3Ce4D5Dis7fim Distenia zteca fimbriata JX221000  
XXXXXXXXXX-899837 Disteniidae sp\_idba contig\_31  
XX-CP1Ch3Ce4P5P6De7DER01 Derobrachus DER01 NCBI  
XXX-CP1Ch3Ce4P5Me6Pr7ret Prionopus reticularis NCBI  
XX-CP1Ch3Ce4P5P6T17gig Titanus giganteus NCBI  
XXX-CP1Ch3Ce4C5R6R07coe Rosalia coelestis NCBI  
X-CP1Ch3Ce4C5S6S7ate Stenopterus ater NCBI  
XXX-CP1Ch3Ce4C5T6T7sml Thranix simplex NCBI  
XXX-CP1Cu3B40SR7mol Rhopalotria mollis NCBI  
XXX-CP1Ch3Ce4C5X6Xy7glo Xystrocer a globosa NCBI  
XXX-CP1Ch3Ce4C5Ca6Ar7bun Aromia bungii NCBI  
XXX-CP1Ch3Ce4C5Ca6Po7fas Polyzonus fasciatus NCBI  
XXXXXXXXXX-CP1Ch3Ce4C5Ca6Cl7cla Closteromerus claviger HQ232804  
X-CP1Ch3Ce4P5R6R7fru Rhapsipodus frustorferi NCBI  
XXX-CP1Ch3Ce4P5M6Me7sin Megopsis sinica NCBI  
X-CP1Ch3C4C5P6Ph7wol Phyllochoris wollumbina NCBI  
X-CP1Ch3C4C5G6Pe7car Peltoschema cardinalis NCBI  
XXX-CP1Ch3Ce4P5P6Pri7cto Priotyranus closteroides NCBI  
XX-CP1Ch3Ce4P5P6Pr7lat Prionus laticollis NCBI  
X-CP1Ch3Ce4P5P6Do7gra Dorysthenes granulosus NCBI  
X-CP1Ch3Ce4P5P6Do7ziv Dorysthenes zivetta NCBI  
XX-CP1Ch3Ce4P5P6Do7par Dorysthenes paradoxus NCBI  
XX-CP1Ch3C4M5Ma7BDF2000 Mastotethus BDF2000 NCBI  
XXX-CP1Ch3Ce4Pa5Pa7jan Parandra janus NCBI  
X-CP1Ch3Ce4P5P6Pr7mur Prionus murzini NCBI  
XXX-CP1Ch3Ce4P5P6Do7fos Dorysthenes fossatus NCBI  
X-CP1Ch3Ce4P5P6Pr7gal Prionus gahani NCBI  
X-CP1Ch3Ce4P5P6Pr7asi Prionus asiaticus NCBI  
X-CP1Ch3Ce4P5P6Pr7ins Prionus insularis NCBI  
X-CP1Ch3Ce4C5Di6Di7NLG2014 Distichocera NLG2014 NCBI  
X-CP1Ch3Ce4C5Er6Ch7NLG2014 Chaodalys NLG2014 NCBI  
XXXXXXXXXX-CP1Ch3Ce4P5 Prioninae sp\_JX220991  
XXXXXXXXXX-CP1Ch3 Chrysomeloidea sp2 Panama.idba.164\_MMG\_ANNOT\_FROM\_TREE  
XXXXXXXXXX-CP1Ch3 Chrysomeloidea sp3 Panama.idba.176\_MMG\_ANNOT\_FROM\_TREE  
XXXXXXXXXXXXXXXXXX-CP1Ch3Ce4C5Ce6Ma7rad Massicus raddei NC\_023937\_MERGED  
XXX-CP1Ch3Ce4C5Ce6R7bow Rhytidodera bowringii NCBI  
XXX-CP1Ch3Ce4C5Ce6Gi7aur Gibbocerambyx aurovirgatus NCBI  
XX-CP1Ch3Ce4C5Ce6Ce7cer Cerambyx cerdo NCBI  
XXX-CP1Ch3Ce4C5Ce6Tri7ori Trirachys orientalis NCBI  
XXXXXXXXXX-CP1Ch3Ce4C5Ce6Ae7oen Aeolesthes oenochrous NCBI  
XXX-CP1Ch3Ce4C5Ce6Mar7ful Margites fulvidus NCBI  
XXX-CP1Ch3Ce4C5Ce6Tr7sin Trachylophus sinensis NCBI  
X-CP1Ch3Ce4C5Ce6Na7can Nadezhdiella cantori NCBI  
X-CP1Ch3Ce4C5Ca6L16Be7NLG2014 Bethelium NLG2014 NCBI  
XX-CP1Ch3Ce4C5A6Z7min Zorion minutum NCBI  
XX-CP1Ch3Ce4A5T7JH2004 Aseminae TJH2004 NCBI  
XX-CP1Ch3Ce4C5T6e7BDF2000 Dendrobias BDF2000 NCBI  
XX-CP1Ch3Ce4C5P6Ba7sut Batyle suturalis NCBI  
XXXXXXXXXX-CP1Cu3 Cucujoidea sp36 Panama.idba.262\_MMG\_ANNOT\_FROM\_TREE  
X-CP1Ch3Ce4C5E6E17muc Elaphidion mucronatum NCBI  
XXXXXXXXXXXXXXXXXX-CP1Ch3 Chrysomeloidea sp6 Panama.idba.46\_MMG\_ANNOT\_FROM\_TREE  
XXXXXXXXXXXXXXXXXX-CP1Ch3Ce4 Cerambycidae sp1 Panama.idba.129\_MMG\_ANNOT\_FROM\_BARCODE  
XX-CP1Ch3Ce4C5He6Eb7BDF2000 Eburia BDF2000 NCBI  
XX-CP1Ch3Ce4C5D6R7ORN01 Ornithia ORN01 NCBI  
XX-CP1Ch3Ce4C5P6St7BDF2000 Stenogra BDF2000 NCBI  
X-CP1Ch3Ce4C5Ph6Ph7sem Phoracantha semipunctata NCBI  
XX-CP1Ch3Ce4C5H6Ch7BDF2000 Chrysoprasia BDF2000 NCBI  
XXX-CP1Ch3Ce4C5He6Tr7cam Trichoferus campestris NCBI  
XX-CP1Ch3Ce4C5Ca6Ph7aln Phymatodes alni NCBI  
XX-CP1Ch3Ce4C5Ca6Ph7tes Phymatodes testaceus NCBI  
XXXXXXXXXXXXXXXXXX-CP1Ch3Ce4C5Ca6Py7san Pyrrhodium sanguineum amie.idba.43\_MERGED\_MMG\_ANNOT\_FROM\_BARCODE  
XXX-CP1Ch3Ce4C5Ca6L16St7qua Stenogrinum quadrinotatum NCBI  
XX-CP1Ch3Ce4C5P6A7asi Allotræus asiaticus NCBI  
XXXXXXXXXXXXXXXXXX-CP1Ch3Ce4 Cerambycidae sp801 early release1 Panama.idba.101\_MMG\_ANNOT\_FROM\_BARCODE  
XXXXXXXXXXXXXXXXXX-CP1Ch3 Chrysomeloidea sp8 Panama.idba.54\_MMG\_ANNOT\_FROM\_TREE  
XXX-CP1Ch3Ce4C5P6Pu7sid Purpuricenus sideriger NCBI  
X-CP1Ch3Ce4C5T6An7hal Anoplistes halodendri NCBI  
XXX-CP1Ch3Ce4C5P6Pu7tem Purpuricenus temminckii NCBI  
XX-CP1Ch3Ce4C5Ca6Se7jaP Semanotus japonicus NCBI  
XX-CP1Ch3Ce4C5An6An7mys Anaglyptus mysticus NCBI  
XXX-CP1Ch3Ce4C5C6Te7pla Teratoclytus plaviltschikovi NCBI  
X-CP1Ch3Ce4C5C6Cy7cap Cyrtoclytus capra NCBI  
XX-CP1Ch3Ce4C5C6Cl7ari Clytus arietis NCBI  
X-CP1Ch3Ce4C5C6Ne7acu Neoclytus acuminatus NCBI  
XXX-CP1Ch3Ce4C5C6Xy7pyr Xylotrechus pyrrhoderus NCBI  
X-CP1Ch3Ce4C5C6Ru7rus Rusticoclytus rusticus NCBI  
XXX-CP1Ch3Ce4C5C6Cl7ari Clytus arietis NCBI

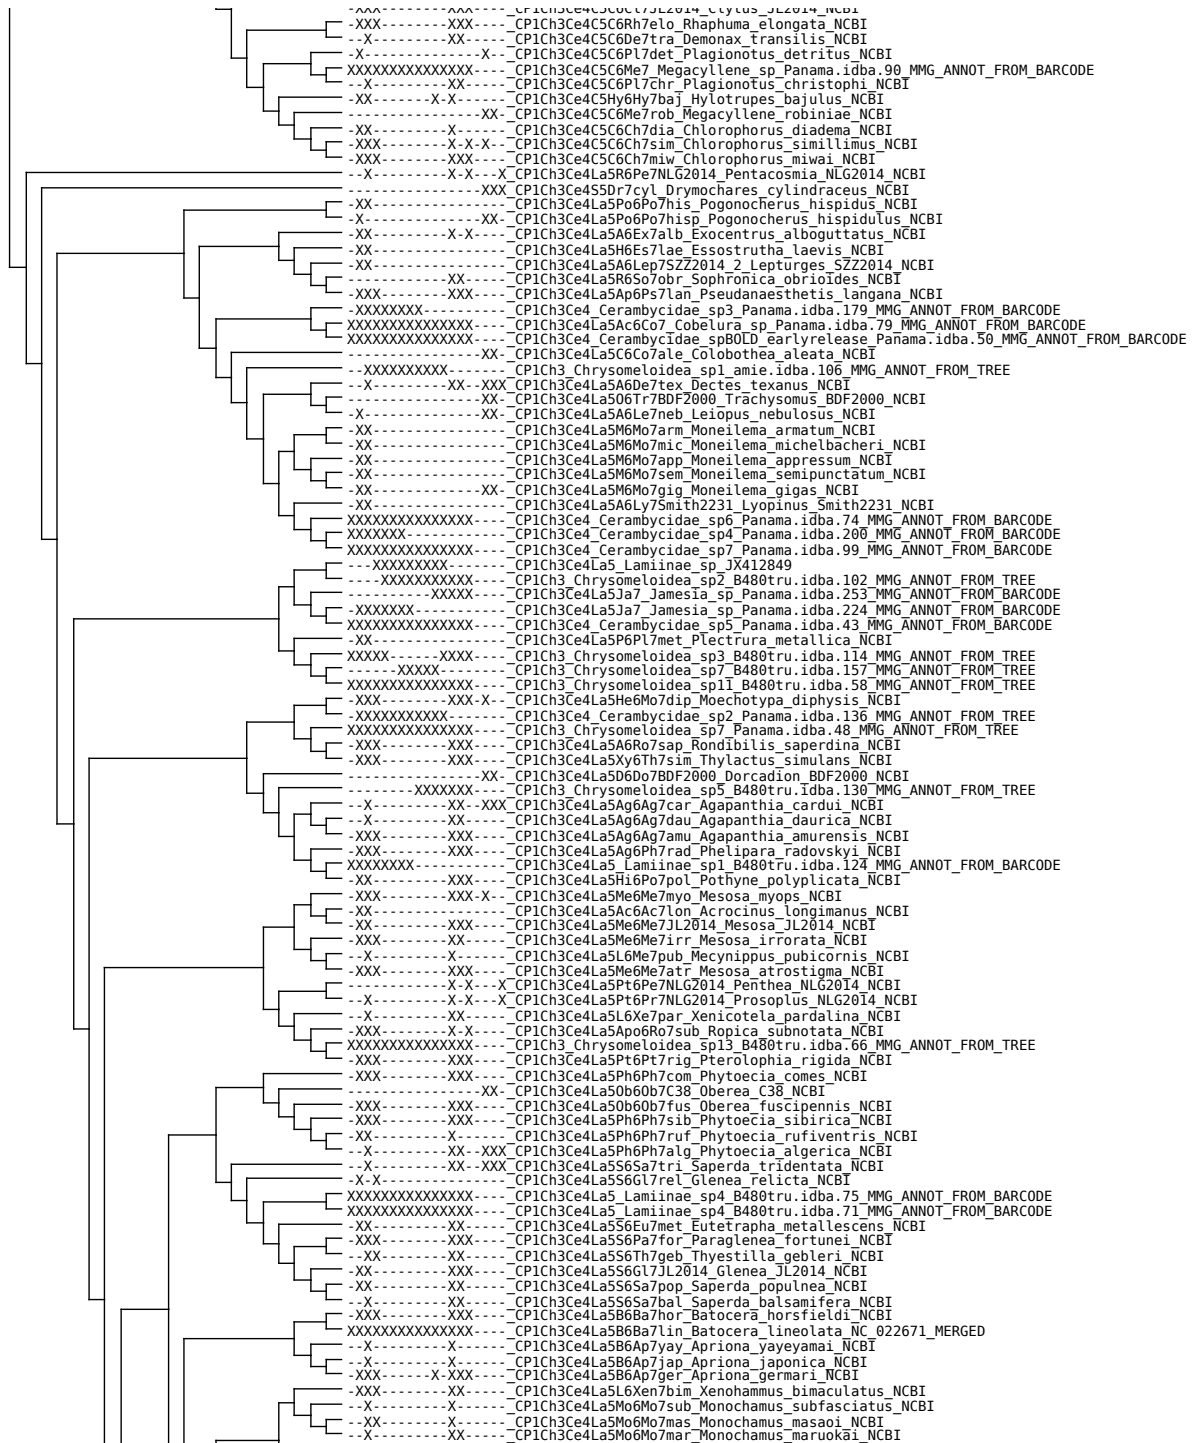

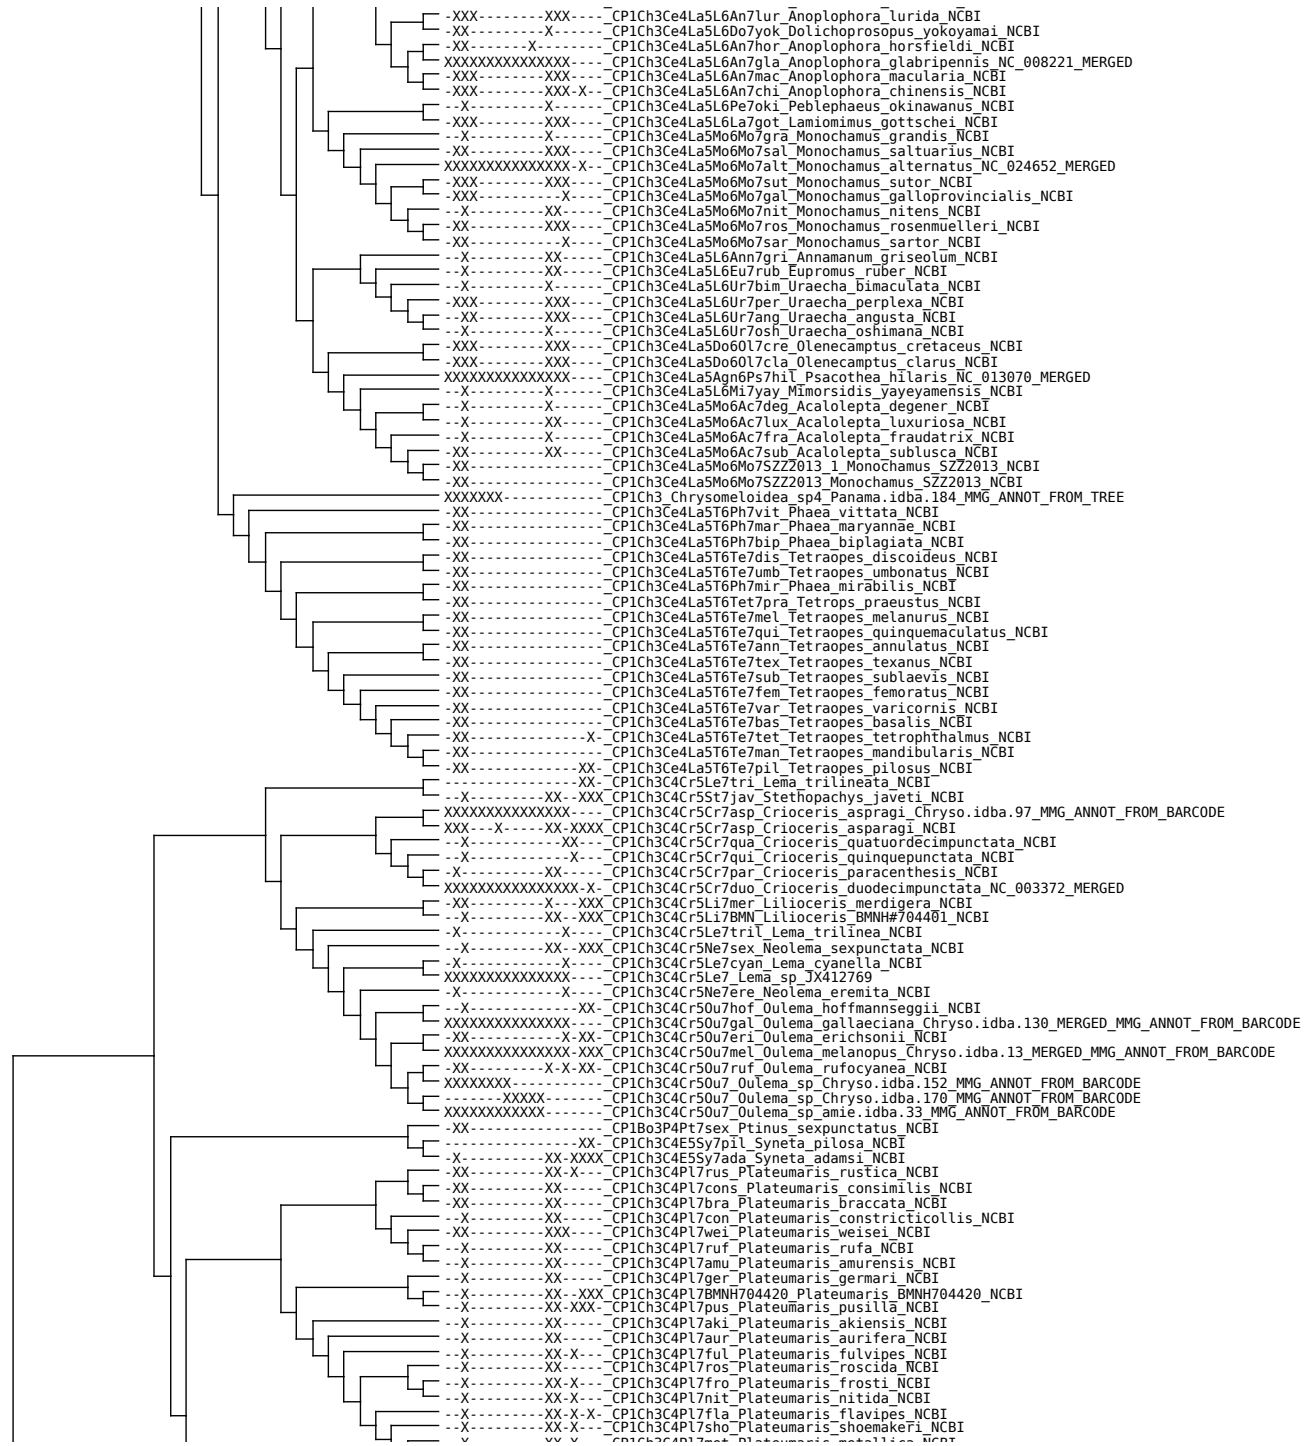

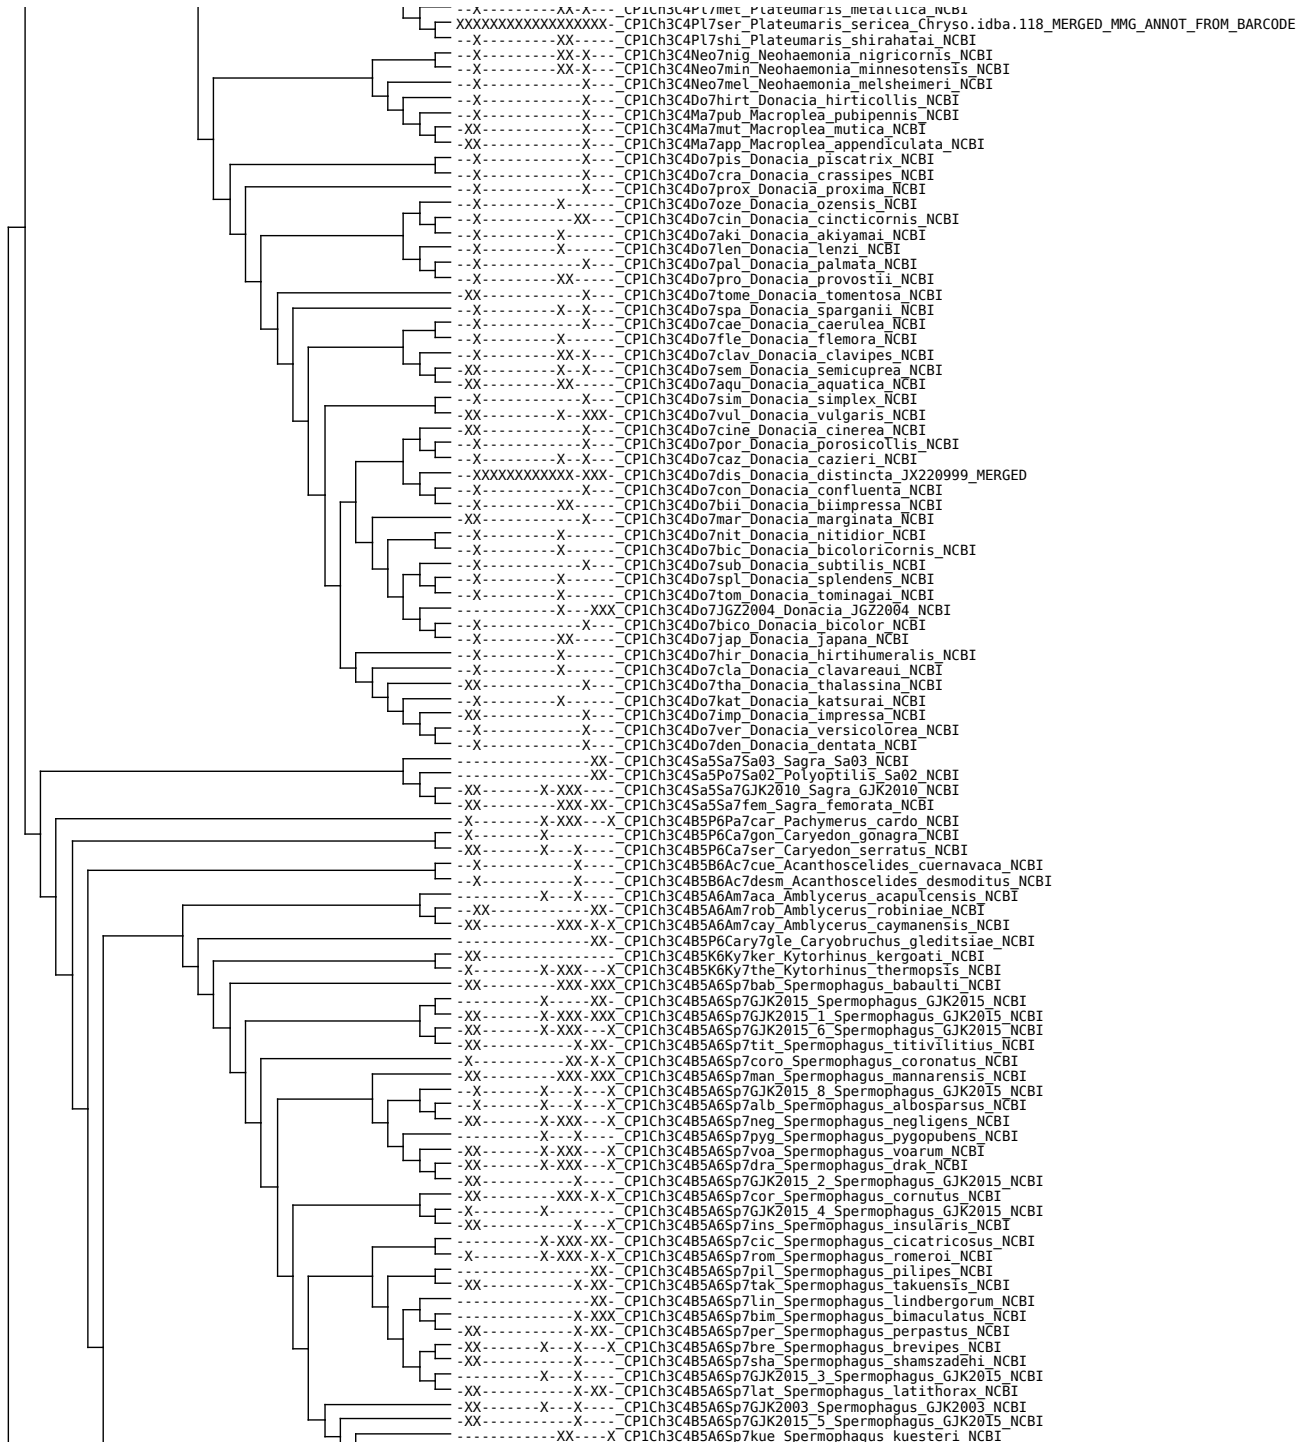

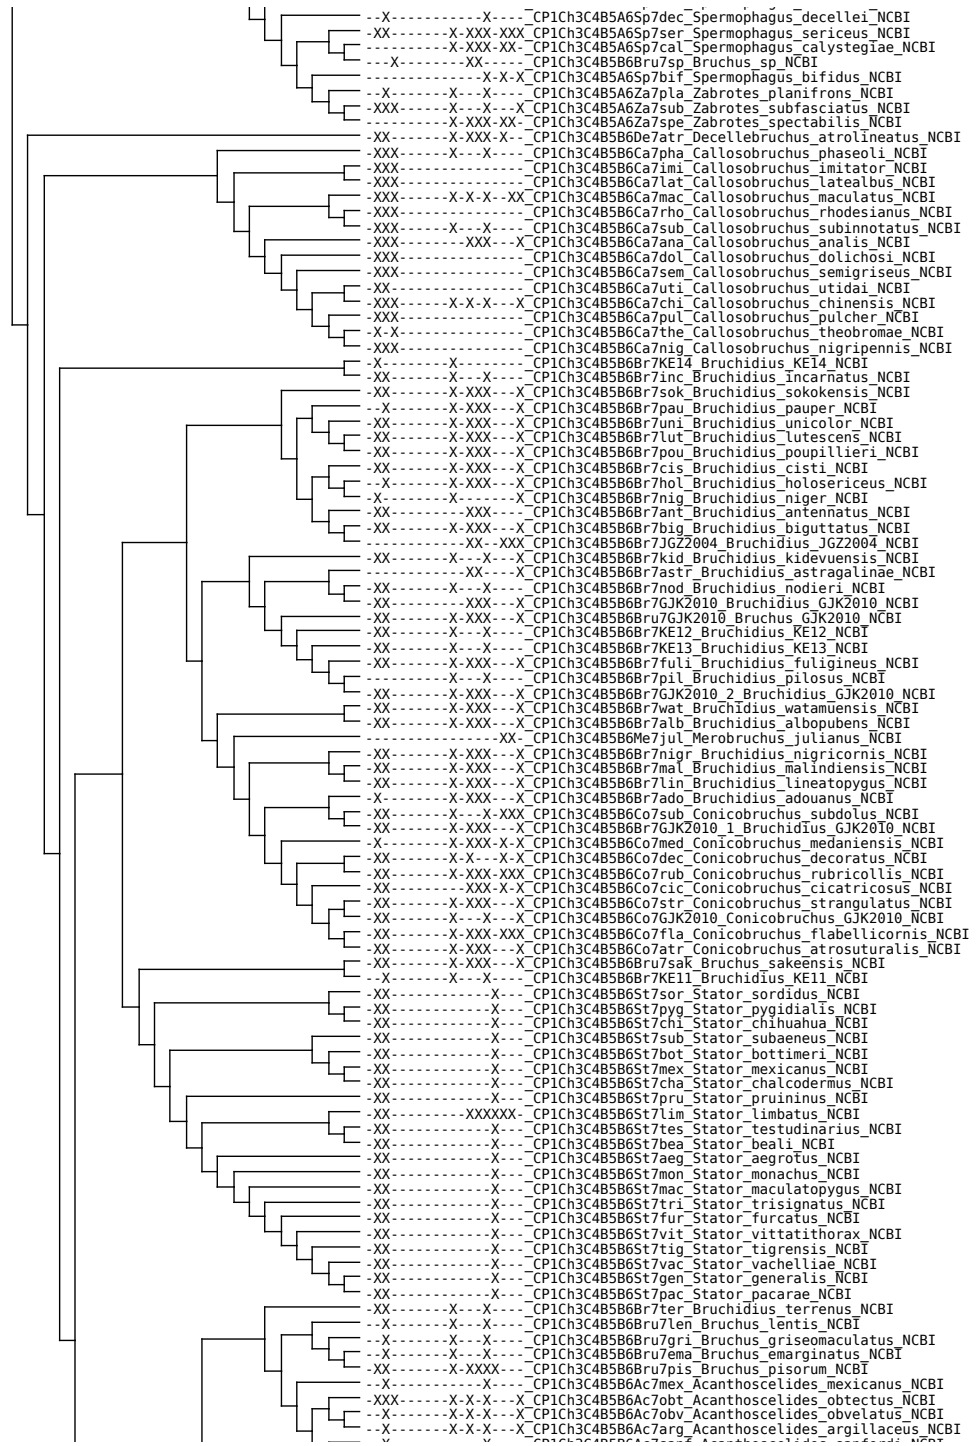

--X-----X----\_CP1Ch3C4B5A6Sp7dec\_Spermophagus\_decellei\_NCBI  
--XX-----X-XXX-XXX\_CP1Ch3C4B5A6Sp7ser\_Spermophagus\_sericeus\_NCBI  
--X-XXX-XX-CP1Ch3C4B5A6Sp7cal\_Spermophagus\_calystegiae\_NCBI  
--X-----XX----\_CP1Ch3C4B5B6Bru7sp\_Bruchus\_sp\_NCBI  
--X-X-X-CP1Ch3C4B5A6Sp7bif\_Spermophagus\_bifidus\_NCBI  
--X-----X-X-CP1Ch3C4B5A6Za7pla\_Zabrotes\_planifrons\_NCBI  
--XXX-----X-X-X-CP1Ch3C4B5A6Za7sub\_Zabrotes\_subfasciatus\_NCBI  
--X-XXX-XX-CP1Ch3C4B5A6Za7spe\_Zabrotes\_spectabilis\_NCBI  
--XX-----X-XXX-X-CP1Ch3C4B5B6De7atr\_Decelebruchus\_atrolineatus\_NCBI  
--XXX-----X-X-CP1Ch3C4B5B6Ca7pha\_Callosobruchus\_phaseoli\_NCBI  
--XXX-----X-CP1Ch3C4B5B6Ca7mi\_Callosobruchus\_imitator\_NCBI  
--XXX-----X-CP1Ch3C4B5B6Ca7lat\_Callosobruchus\_latealbus\_NCBI  
--XXX-----X-X-X-XX-CP1Ch3C4B5B6Ca7mac\_Callosobruchus\_maculatus\_NCBI  
--XXX-----X-CP1Ch3C4B5B6Ca7rho\_Callosobruchus\_rhodesianus\_NCBI  
--XXX-----X-X-CP1Ch3C4B5B6Ca7sub\_Callosobruchus\_subinnotatus\_NCBI  
--XXX-----XXX-X-CP1Ch3C4B5B6Ca7ana\_Callosobruchus\_analis\_NCBI  
--XXX-----CP1Ch3C4B5B6Ca7dol\_Callosobruchus\_dolichosi\_NCBI  
--XXX-----CP1Ch3C4B5B6Ca7sem\_Callosobruchus\_semigriseus\_NCBI  
--XX-----CP1Ch3C4B5B6Ca7uti\_Callosobruchus\_utidai\_NCBI  
--XXX-----X-X-X-CP1Ch3C4B5B6Ca7chi\_Callosobruchus\_chinensis\_NCBI  
--XXX-----CP1Ch3C4B5B6Ca7pul\_Callosobruchus\_pulcher\_NCBI  
--X-X-----CP1Ch3C4B5B6Ca7the\_Callosobruchus\_theobromae\_NCBI  
--XXX-----CP1Ch3C4B5B6Ca7nig\_Callosobruchus\_nigripennis\_NCBI  
--X-----X-CP1Ch3C4B5B6Br7KE14\_Bruchidius\_KE14\_NCBI  
--XX-----X-X-CP1Ch3C4B5B6Br7inc\_Bruchidius\_Incarnatus\_NCBI  
--X-XXX-X-CP1Ch3C4B5B6Br7sok\_Bruchidius\_sokokensis\_NCBI  
--X-----X-XXX-X-CP1Ch3C4B5B6Br7pau\_Bruchidius\_pauper\_NCBI  
--XX-----X-XXX-X-CP1Ch3C4B5B6Br7uni\_Bruchidius\_unicolor\_NCBI  
--X-XXX-X-CP1Ch3C4B5B6Br7lut\_Bruchidius\_lutescens\_NCBI  
--XX-----X-XXX-X-CP1Ch3C4B5B6Br7pou\_Bruchidius\_poupillieri\_NCBI  
--XX-----X-XXX-X-CP1Ch3C4B5B6Br7cis\_Bruchidius\_cisti\_NCBI  
--X-----X-XXX-X-CP1Ch3C4B5B6Br7hol\_Bruchidius\_holosericus\_NCBI  
--X-----X-CP1Ch3C4B5B6Br7nig\_Bruchidius\_niger\_NCBI  
--XX-----XXX-CP1Ch3C4B5B6Br7ant\_Bruchidius\_antennatus\_NCBI  
--XX-----X-XXX-X-CP1Ch3C4B5B6Br7big\_Bruchidius\_biguttatus\_NCBI  
--XX-----XX-XXX-CP1Ch3C4B5B6Br7JGZ2004\_Bruchidius\_JGZ2004\_NCBI  
--XX-----X-X-X-CP1Ch3C4B5B6Br7kid\_Bruchidius\_kidevuensis\_NCBI  
--XX-----XX-X-CP1Ch3C4B5B6Br7astr\_Bruchidius\_astragalinae\_NCBI  
--XX-----X-X-CP1Ch3C4B5B6Br7nod\_Bruchidius\_nodieri\_NCBI  
--XX-----XXX-X-CP1Ch3C4B5B6Br7GJK2010\_Bruchidius\_GJK2010\_NCBI  
--XX-----X-XXX-X-CP1Ch3C4B5B6Bru7GJK2010\_Bruchus\_GJK2010\_NCBI  
--XX-----X-X-CP1Ch3C4B5B6Br7KE12\_Bruchidius\_KE12\_NCBI  
--XX-----X-X-CP1Ch3C4B5B6Br7KE13\_Bruchidius\_KE13\_NCBI  
--XX-----X-XXX-X-CP1Ch3C4B5B6Br7fuli\_Bruchidius\_fuliginosus\_NCBI  
--X-X-CP1Ch3C4B5B6Br7pil\_Bruchidius\_pilosus\_NCBI  
--XX-----X-XXX-X-CP1Ch3C4B5B6Br7GJK2010\_2\_Bruchidius\_GJK2010\_NCBI  
--XX-----X-XXX-X-CP1Ch3C4B5B6Br7wat\_Bruchidius\_watamensis\_NCBI  
--XX-----X-XXX-X-CP1Ch3C4B5B6Br7alb\_Bruchidius\_albobubens\_NCBI  
--X-XXX-XX-CP1Ch3C4B5B6Me7jul\_Merobruchus\_julianus\_NCBI  
--XX-----X-XXX-X-CP1Ch3C4B5B6Br7nigr\_Bruchidius\_nigricornis\_NCBI  
--XX-----X-XXX-X-CP1Ch3C4B5B6Br7mal\_Bruchidius\_malindiensis\_NCBI  
--XX-----X-XXX-X-CP1Ch3C4B5B6Br7lin\_Bruchidius\_lineatopygus\_NCBI  
--X-----X-XXX-X-CP1Ch3C4B5B6Br7ado\_Bruchidius\_adouanus\_NCBI  
--XX-----X-X-XXX-CP1Ch3C4B5B6Co7sub\_Conicobruchus\_subdolosus\_NCBI  
--XX-----X-XXX-X-CP1Ch3C4B5B6Br7GJK2010\_1\_Bruchidius\_GJK2010\_NCBI  
--X-----X-XXX-X-CP1Ch3C4B5B6Co7med\_Conicobruchus\_medaniensis\_NCBI  
--XX-----X-X-X-CP1Ch3C4B5B6Co7dec\_Conicobruchus\_decoratus\_NCBI  
--XX-----X-XXX-XXX-CP1Ch3C4B5B6Co7rub\_Conicobruchus\_rubricollis\_NCBI  
--XX-----XXX-X-X-CP1Ch3C4B5B6Co7cic\_Conicobruchus\_cicatricosus\_NCBI  
--XX-----X-XXX-X-CP1Ch3C4B5B6Co7str\_Conicobruchus\_strangulatus\_NCBI  
--XX-----X-X-X-CP1Ch3C4B5B6Co7GJK2010\_Conicobruchus\_GJK2010\_NCBI  
--XX-----X-XXX-XXX-CP1Ch3C4B5B6Co7fla\_Conicobruchus\_flabellicornis\_NCBI  
--XX-----X-XXX-X-CP1Ch3C4B5B6Co7atr\_Conicobruchus\_atrosuturalis\_NCBI  
--XX-----X-XXX-X-CP1Ch3C4B5B6Bru7saK\_Bruchus\_sakeensis\_NCBI  
--X-----X-X-CP1Ch3C4B5B6Br7KE11\_Bruchidius\_KE11\_NCBI  
--XX-----X-CP1Ch3C4B5B6St7sor\_Stator\_sordidus\_NCBI  
--XX-----X-CP1Ch3C4B5B6St7pyg\_Stator\_pygidialis\_NCBI  
--XX-----X-CP1Ch3C4B5B6St7chi\_Stator\_chiuhuahua\_NCBI  
--XX-----X-CP1Ch3C4B5B6St7sub\_Stator\_subaeneus\_NCBI  
--XX-----X-CP1Ch3C4B5B6St7bot\_Stator\_bottimeri\_NCBI  
--XX-----X-CP1Ch3C4B5B6St7mex\_Stator\_mexicanus\_NCBI  
--XX-----X-CP1Ch3C4B5B6St7cha\_Stator\_chalcodermus\_NCBI  
--XX-----X-CP1Ch3C4B5B6St7pru\_Stator\_pruinus\_NCBI  
--XX-----XXXXXX-CP1Ch3C4B5B6St7lim\_Stator\_limbatu NCBI  
--XX-----X-CP1Ch3C4B5B6St7tes\_Stator\_testudinarius\_NCBI  
--XX-----X-CP1Ch3C4B5B6St7bea\_Stator\_beali\_NCBI  
--XX-----X-CP1Ch3C4B5B6St7aeg\_Stator\_aegrotus\_NCBI  
--XX-----X-CP1Ch3C4B5B6St7mon\_Stator\_monachus\_NCBI  
--XX-----X-CP1Ch3C4B5B6St7mac\_Stator\_maculatopygus\_NCBI  
--XX-----X-CP1Ch3C4B5B6St7tri\_Stator\_trisignatus\_NCBI  
--XX-----X-CP1Ch3C4B5B6St7fur\_Stator\_furcatus\_NCBI  
--XX-----X-CP1Ch3C4B5B6St7vit\_Stator\_vittatithorax\_NCBI  
--XX-----X-CP1Ch3C4B5B6St7tig\_Stator\_tigrensis\_NCBI  
--XX-----X-CP1Ch3C4B5B6St7vac\_Stator\_vachelliae\_NCBI  
--XX-----X-CP1Ch3C4B5B6St7gen\_Stator\_generalis\_NCBI  
--XX-----X-CP1Ch3C4B5B6St7pac\_Stator\_pacarae\_NCBI  
--XX-----X-X-CP1Ch3C4B5B6Br7ter\_Bruchidius\_terrenus\_NCBI  
--X-----X-X-CP1Ch3C4B5B6Bru7len\_Bruchus\_lentis\_NCBI  
--X-----X-X-CP1Ch3C4B5B6Bru7gri\_Bruchus\_griseomaculatus\_NCBI  
--X-----X-X-CP1Ch3C4B5B6Bru7ema\_Bruchus\_emarginatus\_NCBI  
--XX-----X-XXXX-CP1Ch3C4B5B6Bru7pis\_Bruchus\_pisorum\_NCBI  
--X-----X-CP1Ch3C4B5B6Ac7mex\_Acanthoscelides\_mexicanus\_NCBI  
--XXX-----X-X-X-CP1Ch3C4B5B6Ac7obt\_Acanthoscelides\_obtectus\_NCBI  
--X-----X-X-X-CP1Ch3C4B5B6Ac7obv\_Acanthoscelides\_obvelatus\_NCBI  
--X-----X-X-X-CP1Ch3C4B5B6Ac7arg\_Acanthoscelides\_argillaceus\_NCBI

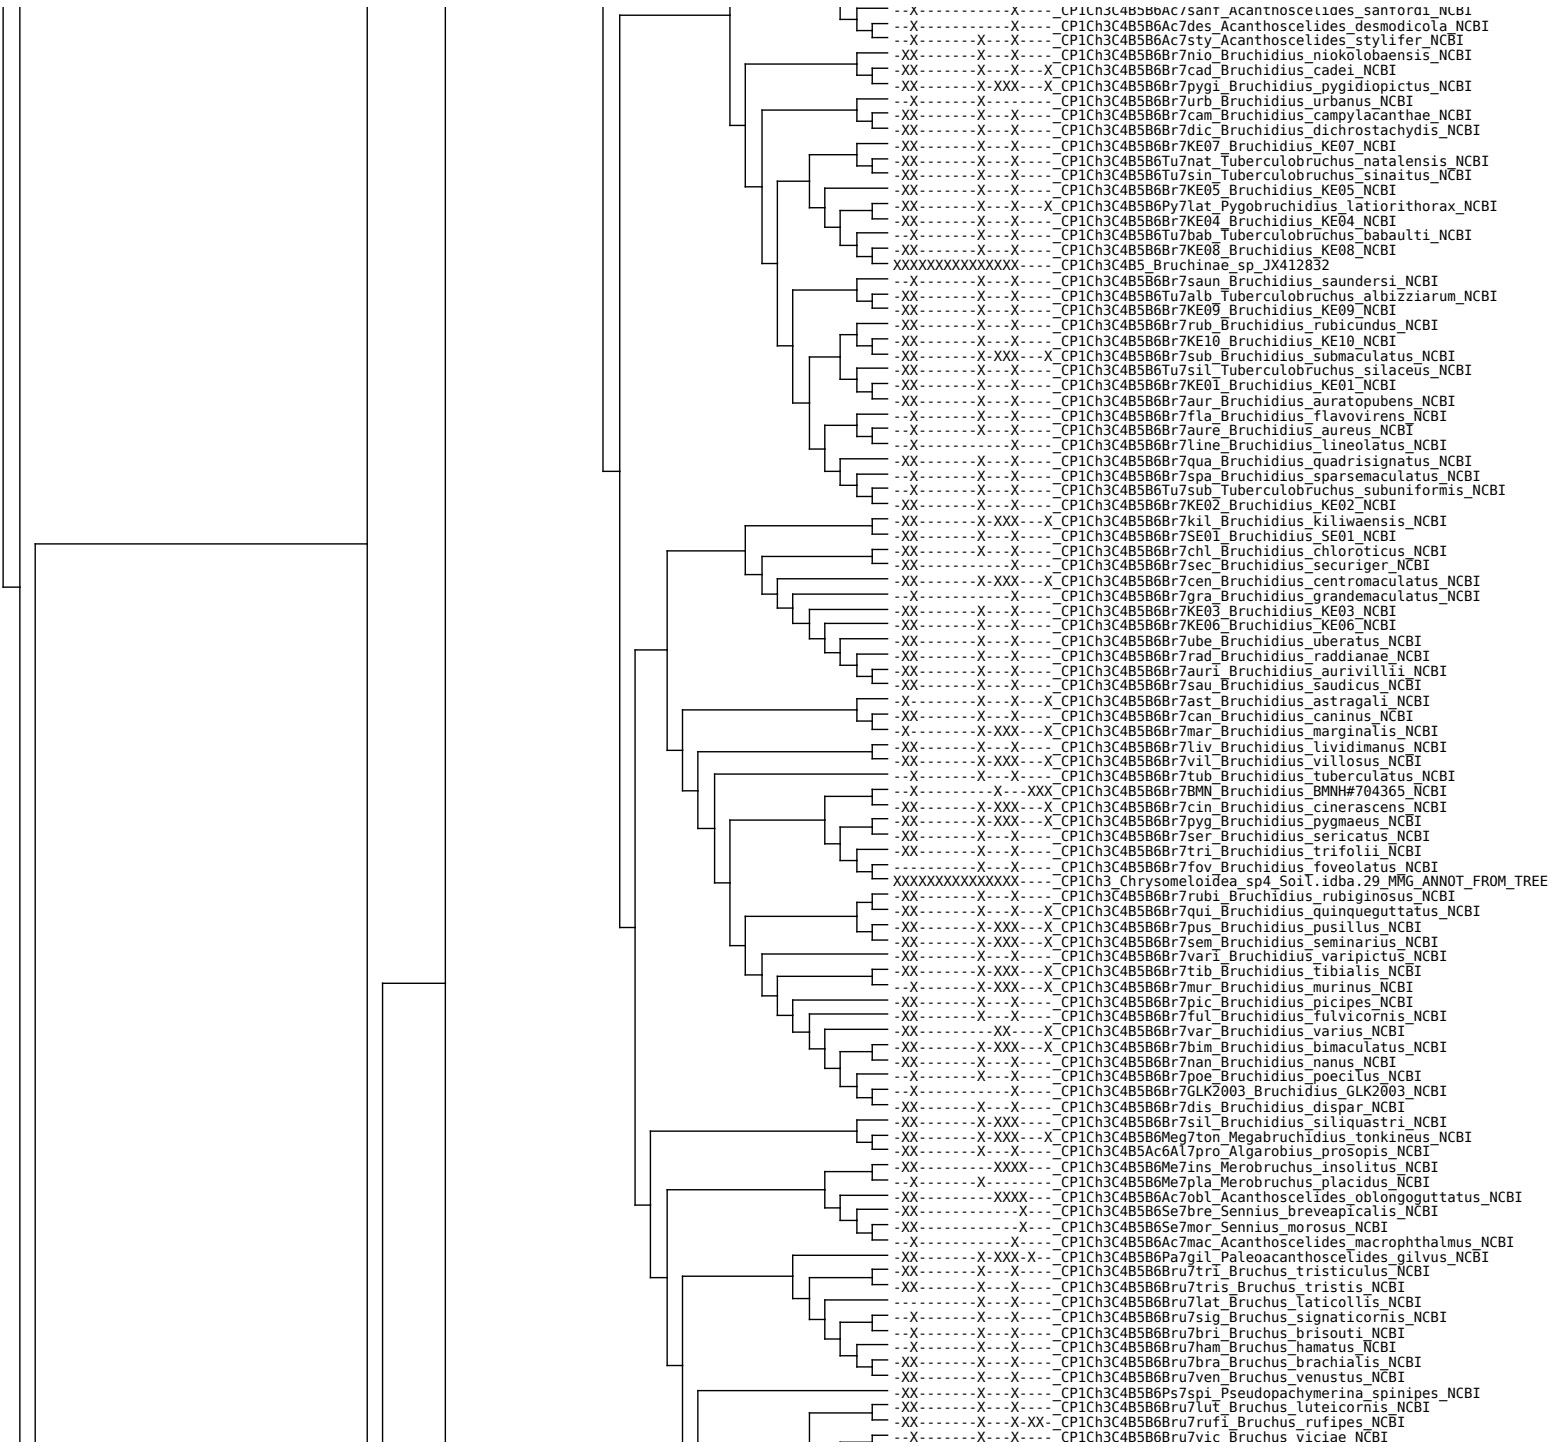



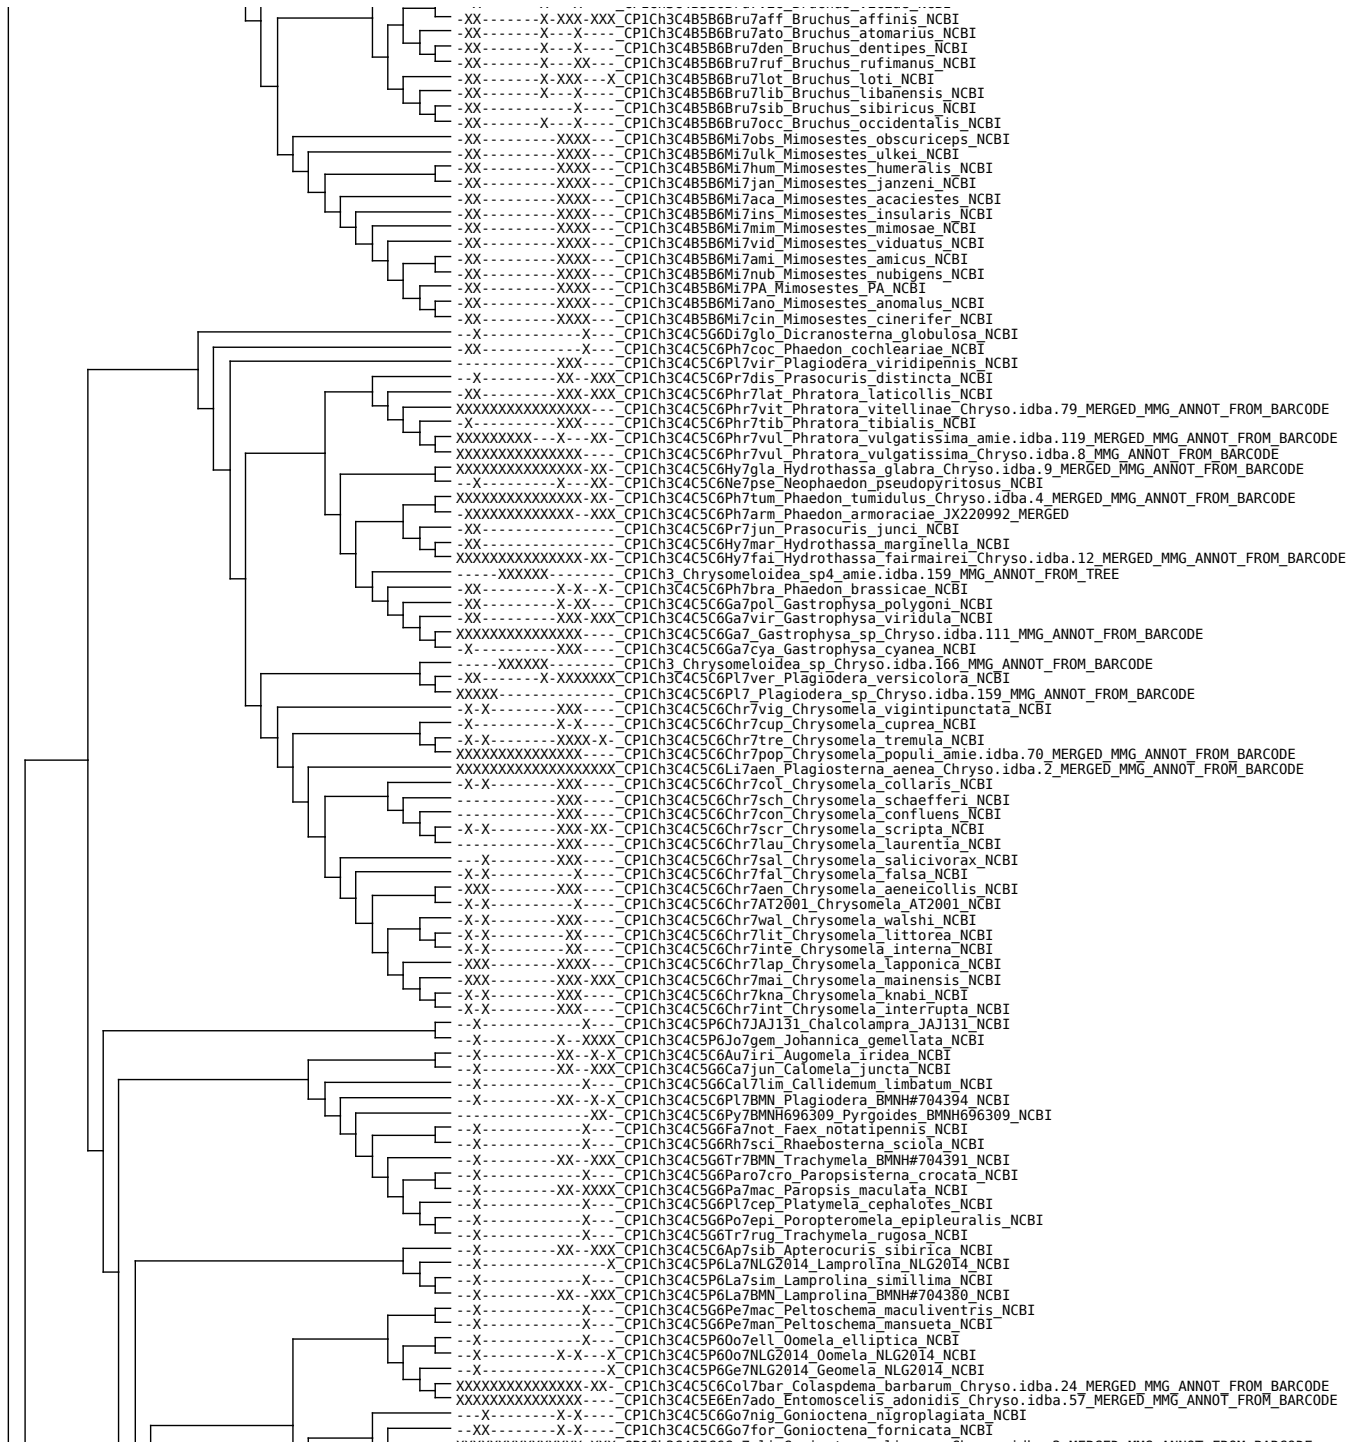

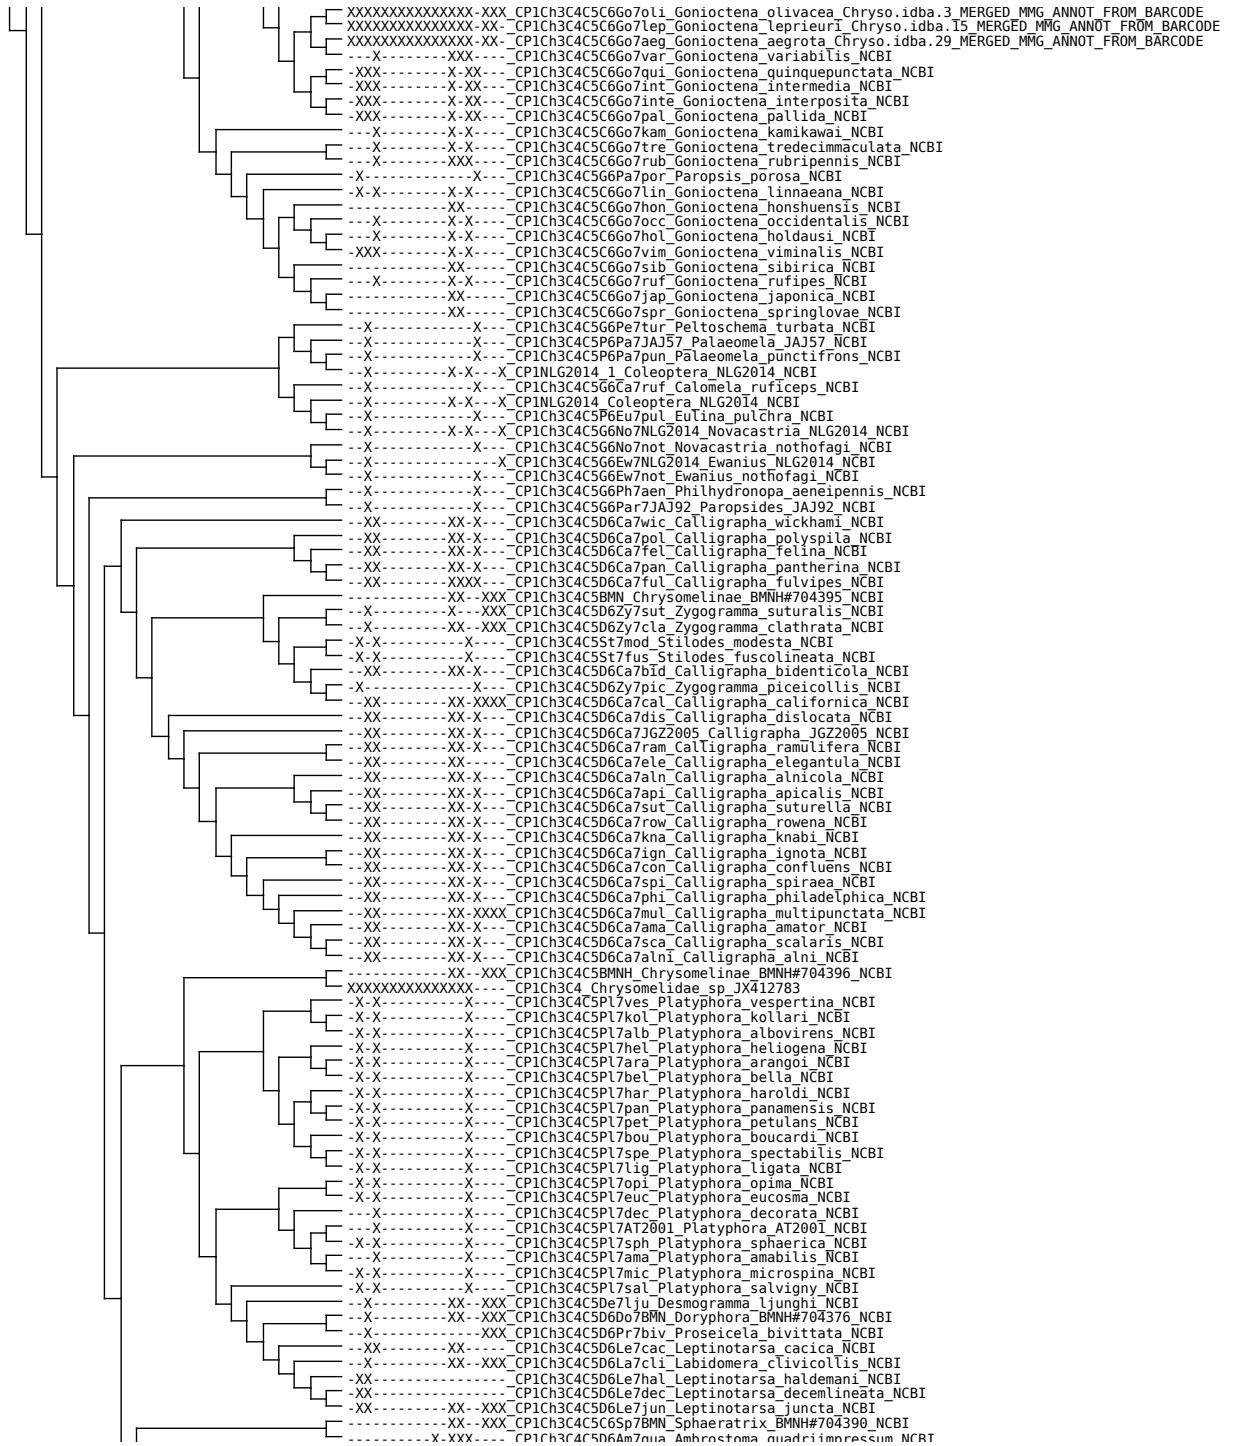

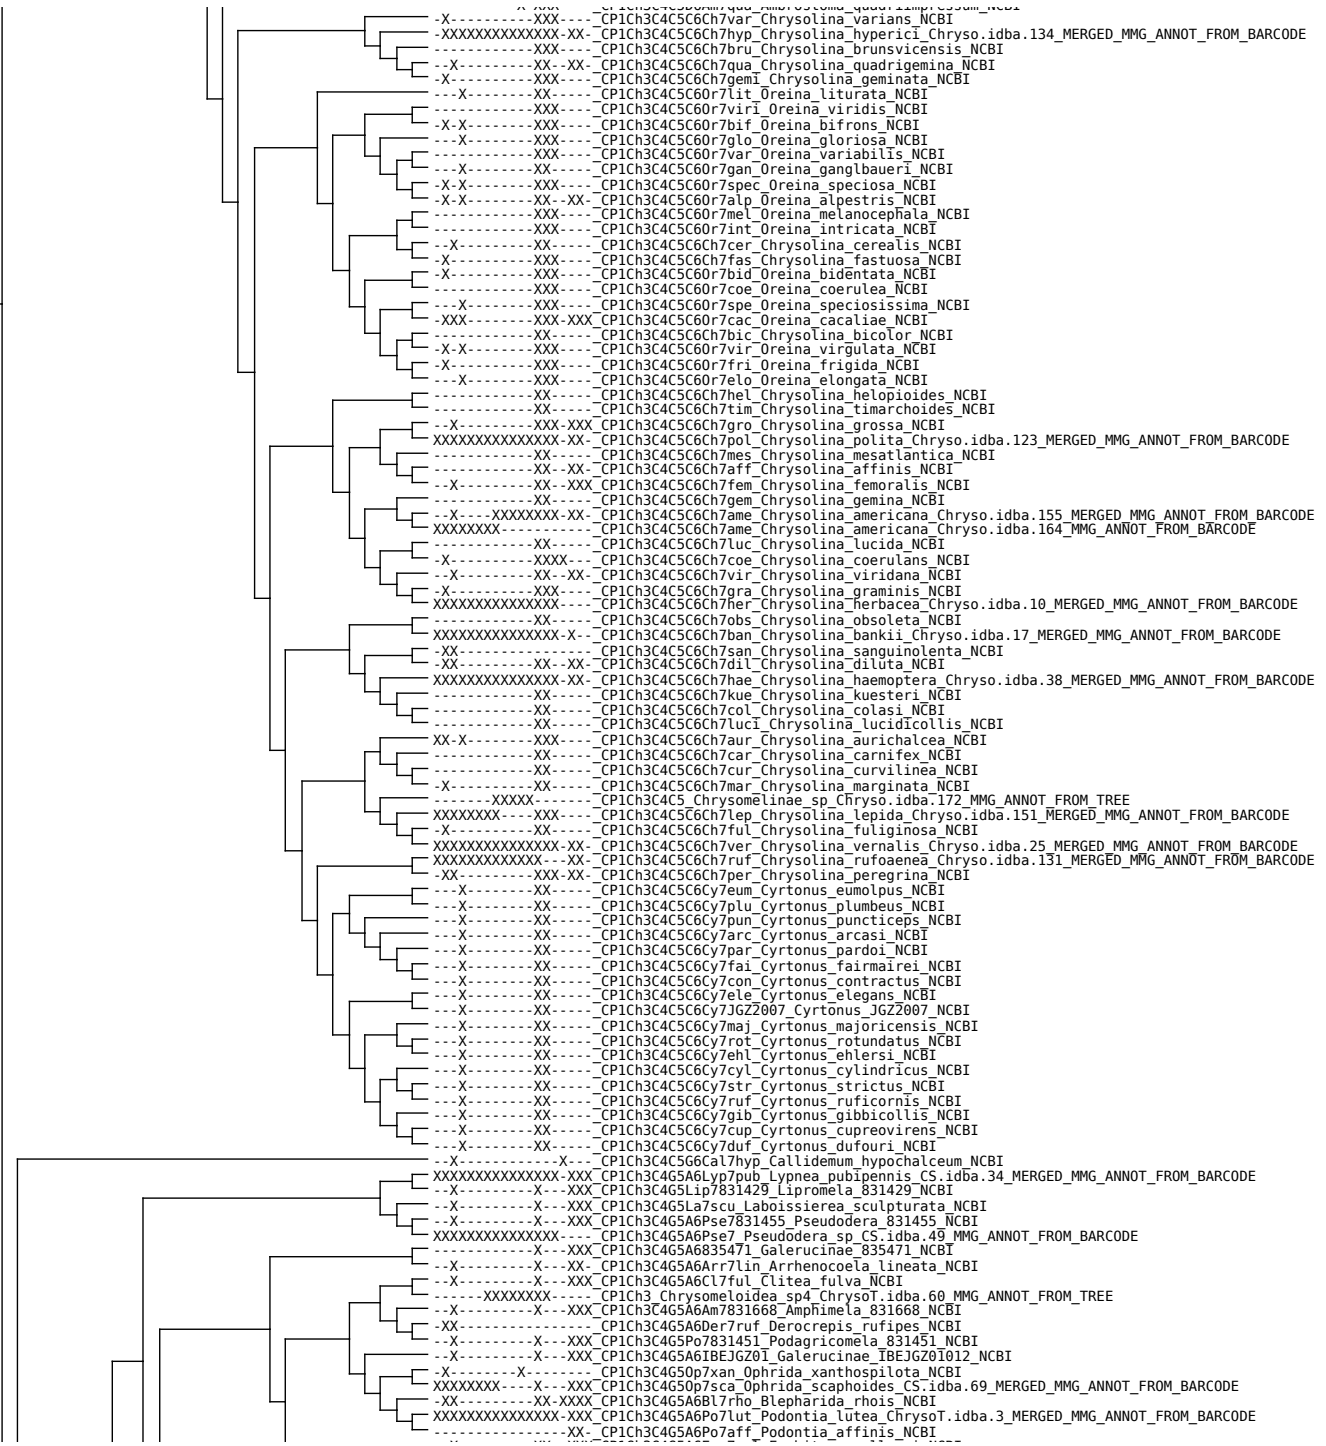

--X-----XX-XXX CP1Ch3C4G5A6Eup7wal Euphitrea\_wallacei\_NCB1  
XXXXXXXXXXXXXXX-XXX CP1Ch3C4G5A6S17ful Sinocrepis\_fulva\_ChrysoT.idba.14\_MERGED\_MMG\_ANNOT\_FROM\_BARCODE  
XXXXXXXXXXXXXXX-XXX CP1Ch3C4N1s7 Nisotra\_sp\_ChrysoT.idba.13\_MMG\_ANNOT\_FROM\_BARCODE  
--X-----X-XXX CP1Ch3C4G5A6N17gem Nisotra\_gemella\_NCB1  
--X-----X-XXX CP1Ch3C4G5Sp782164 Sphaeroderma\_828164\_NCB1  
--X-----XX-XXX CP1Ch3C4G5A6N17gou Nisotra\_goudoti\_NCB1  
XXXXXXXXXXXXXXX-XX- CP1Ch3C4G5A6Pod7fus Podagrira\_fuscipes\_Chryso.idba.135\_MERGED\_MMG\_ANNOT\_FROM\_BARCODE  
XXXXXXXXXXXXXXX-XX-XXX CP1Ch3C4G5A6Pod7mal Podagrira\_malvae\_NCB1  
XXXXXXXXXXXXXXX-XXX CP1Ch3C4G5A6Pod7 Podagrira\_sp\_ChrysoT.idba.133\_MMG\_ANNOT\_FROM\_BARCODE  
XXXXXXXXXXXXXXX-XXX CP1Ch3C4G5A6Pod7 Podagrira\_sp\_CS.idba.45\_MMG\_ANNOT\_FROM\_BARCODE  
--X-----X-XX- CP1Ch3C4G5A6Pod7fusc Podagrira\_fuscicornis\_NCB1  
--X-----X-XXX CP1Ch3C4G5A6Hei7IBE Heikertingerella\_IBEJG200992\_NCB1  
XXXXXXXXXXXXXXX-XXX CP1Ch3C4G5A6Dip7 Dipaltica\_sp\_ChrysoT.idba.1\_MMG\_ANNOT\_FROM\_BARCODE  
--X-----XX-XXX CP1Ch3C4G5A6Dip7BMN Dipaltica\_BMN#704453\_NCB1  
--X-----XX-XXX CP1Ch3C4G5A6Di7BMN Disonychya\_BMN#704454\_NCB1  
--X-----XX-XXX CP1Ch3C4G5A6Ag7hyg Agasicles\_hygrophila\_NCB1  
--X-----X-XXX CP1Ch3C4G5A6Di7xan Disonychya\_xanthomelas\_NCB1  
--X-----X- CP1Ch3C4G5A6Ha7NLG2014 Halticorcus\_NLG2014\_NCB1  
--X-----XX-XXX CP1Ch3C4G5A6IBE Galerucinae\_IBEJG200988\_NCB1  
--X-----X-XXX CP1Ch3C4G5A6IBEJ Galerucinae\_IBEJG200989\_NCB1  
--X-----X-XXX CP1Ch3C4G5A6IBEJGZ Galerucinae\_IBEJGZ01003\_NCB1  
--X-----X-XXX CP1Ch3C4G5A6Al7cre Allochroma\_cream\_NCB1  
--X-----X-X- CP1Ch3C4G5A6Aemor Aedmon\_morisoni\_NCB1  
--X-----XX-XXX CP1Ch3C4G5Mon7835473 Monoplatus\_835473\_NCB1  
--X-----X-XXX CP1Ch3C4G5Mon7835474 Monoplatus\_835474\_NCB1  
--X-----X- CP1Ch3C4G5A6Ho7car Homotyphus\_carinatus\_NCB1  
--X-----X-XXX CP1Ch3C4G5A6Al7CND2002 Allochroma\_CND2002\_NCB1  
--X-----X- CP1Ch3C4G5A6Ps7gut Pseudolampsis\_guttata\_NCB1  
--X-----XX-XXX CP1Ch3C4G5A6Tr7bid Trachyaphthona\_bidentata\_NCB1  
--X-----XX-XXX CP1Ch3C4G5A6Sy7IBE Syphrea\_IBEJG200990\_NCB1  
--X-----XX- CP1Ch3C4G5A6Alt7pag Altica\_pagana\_NCB1  
XXXXXXXXXX- CP1Ch3C4G5A6Sy7 Syphrea\_sp\_ChrysoT.idba.58\_MMG\_ANNOT\_FROM\_BARCODE  
--X-----XX-XXX CP1Ch3C4G5A6Sy7BMN Syphrea\_BMN#704461\_NCB1  
--X-----XX- CP1Ch3C4G5A6Alt7cae Altica\_caerulescens\_NCB1  
XXXXXXXXXXXXXXX- CP1Ch3C4G5A6Alt7ole Altica\_oleracea\_Chryso.idba.51\_MERGED\_MMG\_ANNOT\_FROM\_BARCODE  
--X-----XXX CP1Ch3C4G5A6Alt7BMN Altica\_BMN#704446\_NCB1  
--X-----X-XXX CP1Ch3C4G5A6Alt7fra Altica\_fragariae\_NCB1  
--X-----X-XXXX CP1Ch3C4G5A6Alt7vir Altica\_viridicyanea\_NCB1  
--X-----X- CP1Ch3C4G5A6Alt7cir Altica\_circicola\_NCB1  
--X-----XX- CP1Ch3C4G5A6Alt7pa Altica\_palustris\_NCB1  
--X-----XX- CP1Ch3C4G5A6Alt7tam Altica\_tamaricis\_NCB1  
XXXXXXXXXXXXXXX- CP1Ch3C4G5 Galerucinae\_sp7\_ChrysoT.idba.19\_MMG\_ANNOT\_FROM\_TREE  
--X-----XX- CP1Ch3C4G5A6Al7car Altica\_carythica\_NCB1  
--X-----XX- CP1Ch3C4G5A6Al7hel Altica\_helianthemis\_NCB1  
--X-----XX- CP1Ch3C4G5A6Al7imp Altica\_impressicollis\_NCB1  
XXXXXXXXXXXXXXX-XXX CP1Ch3C4G5A6Mac7sub Macrohaltica\_subplicata\_ChrysoT.idba.16\_MERGED\_MMG\_ANNOT\_FROM\_BARCODE  
--X-----XX- CP1Ch3C4G5A6Al7san Altica\_sanguisobae\_NCB1  
--X-----XX- CP1Ch3C4G5A6Al7carI Altica\_carinata\_NCB1  
--X-----XX- CP1Ch3C4G5A6Al7RJ2013\_1 Altica\_RJ2013\_NCB1  
--X-----XX- CP1Ch3C4G5A6Al7que Altica\_quercetorum\_NCB1  
--X-----XX- CP1Ch3C4G5A6Al7eng Altica\_engstroemi\_NCB1  
XXXXXXXXXX- X-XX- CP1Ch3C4G5A6Al7amp Altica\_ampelophaga\_Chryso.idba.149\_MERGED\_MMG\_ANNOT\_FROM\_BARCODE  
--X-----XX- CP1Ch3C4G5A6Al7kor Altica\_koreana\_NCB1  
--X-----XXXXXX- CP1Ch3C4G5A6Al7bir Altica\_birmanensis\_NCB1  
XXXXXXXXXX- CP1Ch3C4G5A6Mac7 Macrohaltica\_sp\_ChrysoT.idba.157\_MMG\_ANNOT\_FROM\_BARCODE  
XXXXXXXXXX- X-XX- CP1Ch3C4G5A6Al7eri Altica\_ericeti\_ChrysoT.idba.163\_MERGED\_MMG\_ANNOT\_FROM\_BARCODE  
--X-----XX- CP1Ch3C4G5A6Al7bre Altica\_brevicollis\_NCB1  
--X-----XX- CP1Ch3C4G5A6Al7RJ2013 Altica\_RJ2013\_NCB1  
--X-----XX- CP1Ch3C4G5A6Al7lon Altica\_longicollis\_NCB1  
--X-----XX- CP1Ch3C4G5A6Al7lyt Altica\_lythri\_NCB1  
--X-----XX- CP1Ch3C4G5A6Al7aen Altica\_aenescens\_NCB1  
--X-----X-X- CP1S3c4E7sp Euconnus\_sp\_NCB1  
XXXXXXXXXXXXXXX- CP1Ch3C4Lip7min Lipromima\_minuta\_ChrysoT.idba.6\_MMG\_ANNOT\_FROM\_BARCODE  
--X-----X-XXX CP1Ch3C4G5A6Aph7bec Aphthonoides\_beccarii\_NCB1  
--X-----X-XX- CP1Ch3C4G5S6Ps7hir Pseudeustetha\_hirsuta\_NCB1  
--X-----X-XXX CP1Ch3C4G5A6IBEJGZ0 Galerucinae\_IBEJGZ01009\_NCB1  
--X-----XX-XXX CP1Ch3C4G5A6704462 Galerucinae\_704462\_NCB1  
--X-----X-XXX CP1Ch3C4G5A6Par7sep Parathrylea\_septempunctata\_NCB1  
--X-----XXX CP1Ch3C4G5A6Cha7IBE Chabriosoma\_IBEJGZ01017\_NCB1  
--X-----X-XXX CP1Ch3C4G5A6Su7IBE Sutra IBEGZ01016\_NCB1  
--X-----X-XXX CP1Ch3C4G5A6Ch7IBEJ Chabria\_IBEJGZ00998\_NCB1  
XXXXXXXXXXXXXXX-XXX CP1Ch3C4G5A6Ch7ang Chabria\_nr\_angulicollis\_ChrysoT.idba.36\_MERGED\_MMG\_ANNOT\_FROM\_BARCODE  
--X-----XX- CP1Ch3C4G5A6Ni7orb Nisotra\_orbiculata\_NCB1  
--X-----XX-XXX CP1Ch3C4G5A6Ch7BMN Chabria\_BMN#704450\_NCB1  
--X-----XX-XXX CP1Ch3C4G5A6Phyg7BMN Phygasoma\_BMN#704459\_NCB1  
--X-----XX-XXX CP1Ch3C4G5A6Man7IBE Manobia\_IBEJGZ01002\_NCB1  
XXXXXXXXXXXXXXX-XXX CP1Ch3C4G5A6Lan7ram Lanka\_ramakrishnai\_ChrysoT.idba.39\_MERGED\_MMG\_ANNOT\_FROM\_BARCODE  
XXXXXXXXXXXXXXX-XXX CP1Ch3C4G5A6Te7ker Tegyrus\_keralesis\_ChrysoT.idba.32\_MERGED\_MMG\_ANNOT\_FROM\_BARCODE  
--X-----XX-XXX CP1Ch3C4G5A6Lo7IBE Longitarsus\_IBEJGZ01018\_NCB1  
--X-----XXXXXX- CP1Ch3 Chrysomeloida\_sp13\_ChrysoT.idba.72\_MMG\_ANNOT\_FROM\_TREE  
--X-----XX- CP1Ch3C4G5A6Phy7nod Phyllotreta\_nodicornis\_NCB1  
XXXXXXXXXX- CP1Ch3C4G5A6Phy7nig Phyllotreta\_nigripes\_ChrysoT.idba.54\_MERGED\_MMG\_ANNOT\_FROM\_BARCODE  
XXXXXXXXXXXXXXX-XX- CP1Ch3C4G5A6Phy7var Phyllotreta\_variipennis\_ChrysoT.idba.119\_MERGED\_MMG\_ANNOT\_FROM\_BARCODE  
XXXXXXXXXXXXXXX-XX- CP1Ch3C4G5A6Phy7hem Phyllotreta\_hemipoda\_ChrysoT.idba.109\_MERGED\_MMG\_ANNOT\_FROM\_BARCODE  
XXXXXXXXXXXXXXX-XX- CP1Ch3C4G5A6Phy7und Phyllotreta\_undulata\_ChrysoT.idba.114\_MERGED\_MMG\_ANNOT\_FROM\_BARCODE  
--X-----X-XXX CP1Ch3C4G5A6Phy7str Phyllotreta\_striolata\_NCB1  
XXXXXXXXXXXXXXX-XX- CP1Ch3C4G5A6Phy7tet Phyllotreta\_tetrastigma\_ChrysoT.idba.80\_MERGED\_MMG\_ANNOT\_FROM\_BARCODE  
XXXXXXXXXXXXXXX-XX- CP1Ch3C4G5A6Phy7fou Phyllotreta\_foudrasi\_ChrysoT.idba.113\_MERGED\_MMG\_ANNOT\_FROM\_BARCODE  
--X-----XX- CP1Ch3C4G5A6Phy7con Phyllotreta\_consobrina\_NCB1  
XXXXXXXXXXXXXXX- CP1Ch3C4G5A6Phy7par Phyllotreta\_parallela\_ChrysoT.idba.31\_MMG\_ANNOT\_FROM\_BARCODE  
--X-----XX- CP1Ch3C4G5A6Phy7och Phyllotreta\_ochripes\_NCB1  
--X-----XX- CP1Ch3C4G5A6Phy7exc Phyllotreta\_exclamationis\_NCB1  
--X-----XX- CP1Ch3C4G5A6Phy7vit Phyllotreta\_vittula\_NCB1  
--X-----XX- CP1Ch3C4G5A6Phy7atr Phyllotreta\_atra\_NCB1  
XXXXXXXXXXXXXXX-XX- CP1Ch3C4G5A6Phy7cru Phyllotreta\_cruciferae\_ChrysoT.idba.105\_MERGED\_MMG\_ANNOT\_FROM\_BARCODE  
--X-----XX-XXX CP1Ch3C4G5A6R35476 Galerucinae\_R35476\_NCB1

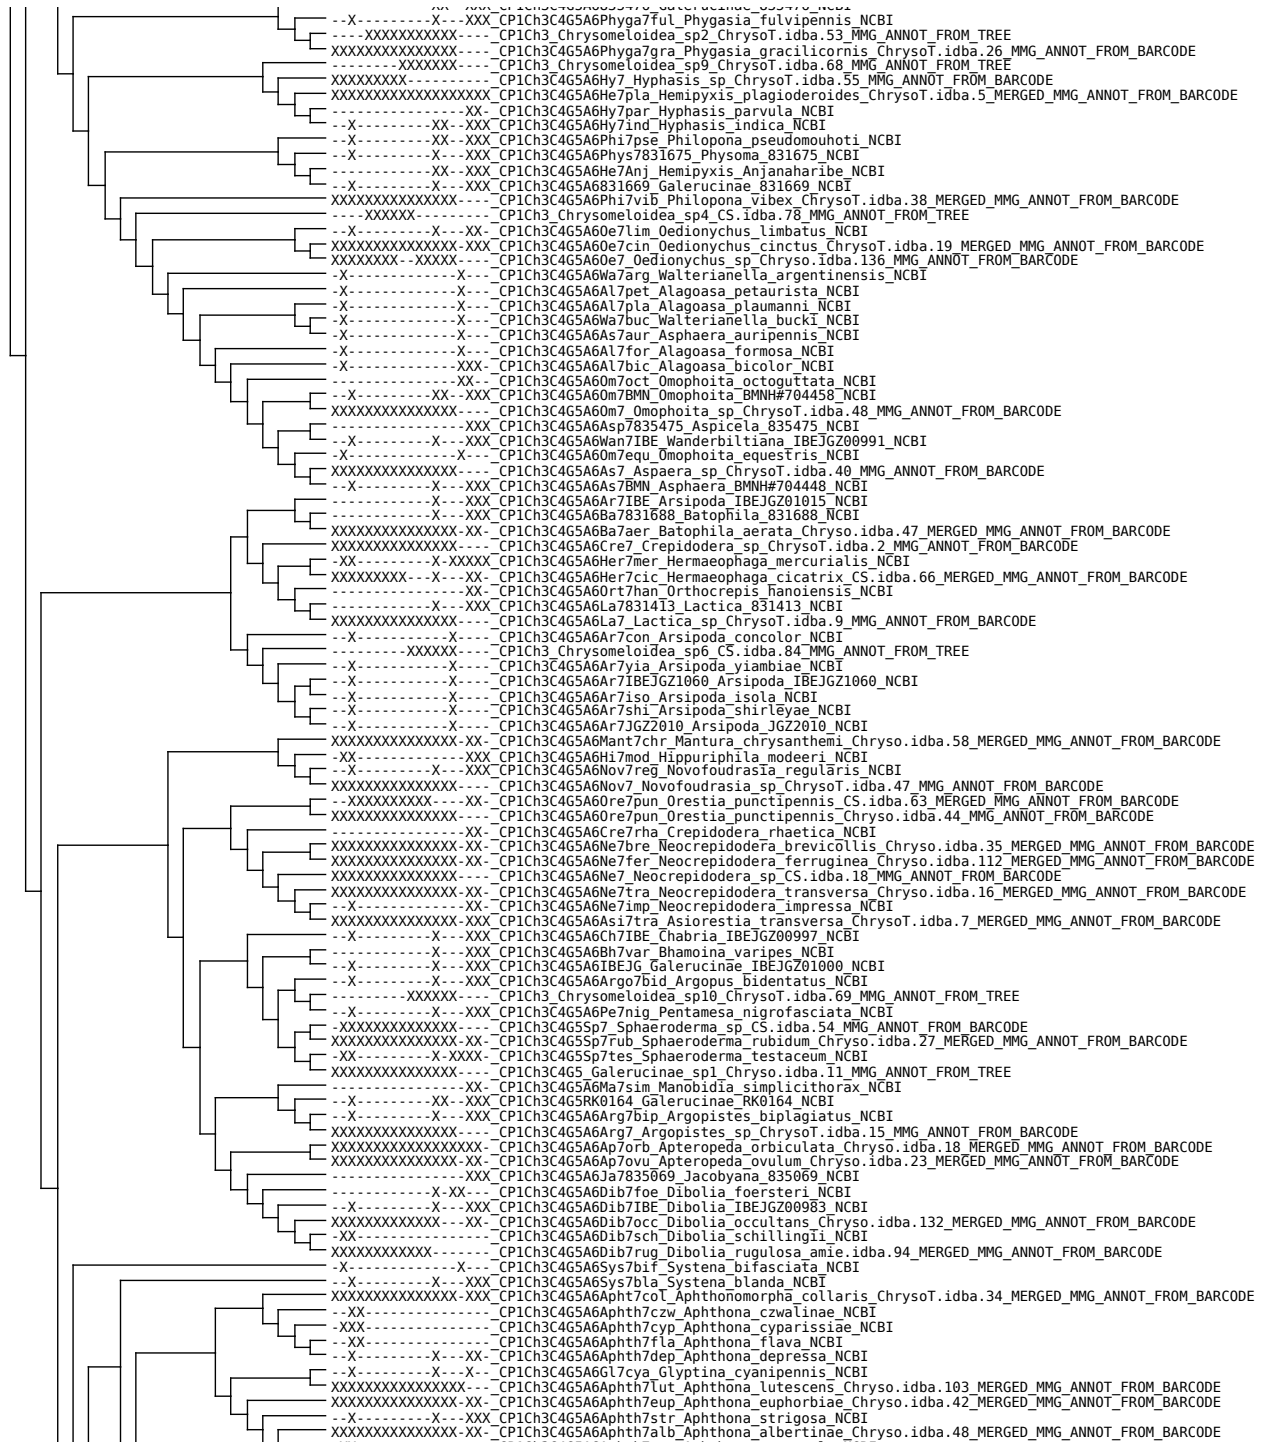

--X-----X-XXX-CP1Ch3C4G5A6Phyga7Fu1\_Phygasia\_fulvipennis NCBI  
-----XXXXXXXXXX-CP1Ch3 Chrysomeloidea\_sp2\_ChrysoT.idba.53\_MMG\_ANNOT\_FROM\_TREE  
XXXXXXXXXXXXXXXX-CP1Ch3C4G5A6Phyga7gra\_Phygasia\_gracilicornis ChrysoT.idba.26\_MMG\_ANNOT\_FROM\_BARCODE  
-----XXXXXXXX-CP1Ch3 Chrysomeloidea\_sp9\_ChrysoT.idba.68\_MMG\_ANNOT\_FROM\_TREE  
XXXXXXXXXX-CP1Ch3C4G5A6Hy7\_Hyphasis\_sp\_ChrysoT.idba.55\_MMG\_ANNOT\_FROM\_BARCODE  
XXXXXXXXXXXXXXXXXXXX-CP1Ch3C4G5A6He7pla\_Hemipyxis\_plagioideroides\_ChrysoT.idba.5\_MERGED\_MMG\_ANNOT\_FROM\_BARCODE  
--X-----XX-CP1Ch3C4G5A6Hy7par\_Hyphasis\_parvula NCBI  
--X-----XX-XXX-CP1Ch3C4G5A6Hy7ind\_Hyphasis\_indica NCBI  
--X-----XX-XXX-CP1Ch3C4G5A6Phi7pse\_Philopona\_pseudomouhoti NCBI  
--X-----X-XXX-CP1Ch3C4G5A6Phys7831675\_Physoma\_831675 NCBI  
--X-----XX-XXX-CP1Ch3C4G5A6He7Anj\_Hemipyxis\_Anjanaharibe NCBI  
--X-----X-XXX-CP1Ch3C4G5A6B31669\_Galerucinae\_831669 NCBI  
XXXXXXXXXXXXXXXX-CP1Ch3C4G5A6Ph7vib\_Philopona\_vibex\_ChrysoT.idba.38\_MERGED\_MMG\_ANNOT\_FROM\_BARCODE  
-----XXXXXX-CP1Ch3 Chrysomeloidea\_sp4\_CS.idba.78\_MMG\_ANNOT\_FROM\_TREE  
--X-----X-XX-CP1Ch3C4G5A6De7lim\_Oedionychus\_limbatu NCBI  
XXXXXXXXXXXXXXXXXXXX-CP1Ch3C4G5A6De7cin\_Oedionychus\_cinctus\_ChrysoT.idba.19\_MERGED\_MMG\_ANNOT\_FROM\_BARCODE  
XXXXXXXX-XXXX-CP1Ch3C4G5A6Oe7Oedionychus\_sp\_ChrysoT.idba.136\_MMG\_ANNOT\_FROM\_BARCODE  
--X-----X-CP1Ch3C4G5A6Wa7arg\_Walterianella\_argentinensis NCBI  
--X-----X-CP1Ch3C4G5A6Al7pet\_Alagoasa\_petaurista NCBI  
--X-----X-CP1Ch3C4G5A6Al7pla\_Alagoasa\_plaumannii NCBI  
--X-----X-CP1Ch3C4G5A6Wa7buc\_Walterianella\_bucki NCBI  
--X-----X-CP1Ch3C4G5A6As7aur\_Aspaera\_auripennis NCBI  
--X-----X-CP1Ch3C4G5A6Al7for\_Alagoasa\_formosa NCBI  
--X-----XXX-CP1Ch3C4G5A6Al7bic\_Alagoasa\_bicolor NCBI  
--X-----XX-CP1Ch3C4G5A6Om7oct\_Omophoita\_octoguttata NCBI  
--X-----XX-XXX-CP1Ch3C4G5A6Om7BMN\_Omophoita\_BMN#704458 NCBI  
XXXXXXXXXXXXXXXX-CP1Ch3C4G5A6Om7 Omophoita\_sp\_ChrysoT.idba.48\_MMG\_ANNOT\_FROM\_BARCODE  
--X-----XXX-CP1Ch3C4G5A6Asp7835475\_Aspicela\_835475 NCBI  
--X-----X-XXX-CP1Ch3C4G5A6Wan7IBE\_Wanderbiltiana\_IBEJG200991 NCBI  
--X-----X-CP1Ch3C4G5A6Om7equ\_Omophoita\_equetris NCBI  
XXXXXXXXXXXXXXXX-CP1Ch3C4G5A6As7\_Aspaera\_sp\_ChrysoT.idba.40\_MMG\_ANNOT\_FROM\_BARCODE  
--X-----X-XXX-CP1Ch3C4G5A6As7BMN\_Aspaera\_BMN#704448 NCBI  
--X-----X-XXX-CP1Ch3C4G5A6Ar7BE\_Arsipoda\_IBEJG201015 NCBI  
--X-----X-XXX-CP1Ch3C4G5A6Ba7831688\_Batophila\_831688 NCBI  
XXXXXXXXXXXXXXXXXXXX-CP1Ch3C4G5A6Ba7aer\_Batophila\_aerata\_ChrysoT.idba.47\_MERGED\_MMG\_ANNOT\_FROM\_BARCODE  
XXXXXXXXXXXXXXXX-CP1Ch3C4G5A6Cre7\_Crepidodera\_sp\_ChrysoT.idba.2\_MMG\_ANNOT\_FROM\_BARCODE  
--X-----X-XXXX-CP1Ch3C4G5A6Her7mer\_Hermaeophaga\_mercurialis NCBI  
XXXXXXXXXX-X-XX-CP1Ch3C4G5A6Her7cic\_Hermaeophaga\_cicatrix\_CS.idba.66\_MERGED\_MMG\_ANNOT\_FROM\_BARCODE  
--X-----XX-CP1Ch3C4G5A6Ort7han\_Orthocrepis\_hanoiensis NCBI  
--X-----X-XXX-CP1Ch3C4G5A6La7831413\_Lactica\_831413 NCBI  
XXXXXXXXXXXXXXXXXXXX-CP1Ch3C4G5A6La7 Lactica\_sp\_ChrysoT.idba.9\_MMG\_ANNOT\_FROM\_BARCODE  
--X-----X-CP1Ch3C4G5A6Ar7Con\_Arsipoda\_concolor NCBI  
-----XXXXXX-CP1Ch3 Chrysomeloidea\_sp6\_CS.idba.84\_MMG\_ANNOT\_FROM\_TREE  
--X-----X-CP1Ch3C4G5A6Ar7yia\_Arsipoda\_yiambiae NCBI  
--X-----X-CP1Ch3C4G5A6Ar7IBEJG21060\_Arsipoda\_IBEJG21060 NCBI  
--X-----X-CP1Ch3C4G5A6Ar7iso\_Arsipoda\_isola NCBI  
--X-----X-CP1Ch3C4G5A6Ar7shi\_Arsipoda\_shirleyae NCBI  
--X-----X-CP1Ch3C4G5A6Ar7JG22010\_Arsipoda\_JG22010 NCBI  
XXXXXXXXXXXXXXXX-XX-CP1Ch3C4G5A6Mant7chr\_Mantura\_chrysanthemii\_ChrysoT.idba.58\_MERGED\_MMG\_ANNOT\_FROM\_BARCODE  
--X-----XX-CP1Ch3C4G5A6Hi7mod\_Hippuriphila\_moderi NCBI  
--X-----X-XXX-CP1Ch3C4G5A6Nov7reg\_Novofoudrasia\_regularis NCBI  
XXXXXXXXXXXXXXXXXXXX-CP1Ch3C4G5A6Nov7Novofoudrasia\_sp\_ChrysoT.idba.47\_MMG\_ANNOT\_FROM\_BARCODE  
--XXXXXXXXXX-XX-CP1Ch3C4G5A6Ore7pun\_Orestia\_punctipennis\_CS.idba.63\_MERGED\_MMG\_ANNOT\_FROM\_BARCODE  
XXXXXXXXXXXXXXXXXXXX-CP1Ch3C4G5A6Ore7pun\_Orestia\_punctipennis\_ChrysoT.idba.44\_MMG\_ANNOT\_FROM\_BARCODE  
--X-----XX-CP1Ch3C4G5A6Cre7rha\_Crepidodera\_rhaetica NCBI  
XXXXXXXXXXXXXXXXXXXX-XX-CP1Ch3C4G5A6Ne7bre\_Neocrepidodera\_brevicollis\_ChrysoT.idba.35\_MERGED\_MMG\_ANNOT\_FROM\_BARCODE  
XXXXXXXXXXXXXXXXXXXX-XX-CP1Ch3C4G5A6Ne7fer\_Neocrepidodera\_ferruginea\_ChrysoT.idba.112\_MERGED\_MMG\_ANNOT\_FROM\_BARCODE  
XXXXXXXXXXXXXXXXXXXX-CP1Ch3C4G5A6Ne7\_Neocrepidodera\_sp\_CS.idba.18\_MMG\_ANNOT\_FROM\_BARCODE  
XXXXXXXXXXXXXXXXXXXX-XX-CP1Ch3C4G5A6Ne7Tra\_Neocrepidodera\_transversa\_ChrysoT.idba.16\_MERGED\_MMG\_ANNOT\_FROM\_BARCODE  
--X-----XX-CP1Ch3C4G5A6Ne7imp\_Neocrepidodera\_impresa NCBI  
XXXXXXXXXXXXXXXXXXXX-XXX-CP1Ch3C4G5A6Asi7tra\_Asiorestia\_transversa\_ChrysoT.idba.7\_MERGED\_MMG\_ANNOT\_FROM\_BARCODE  
--X-----X-XXX-CP1Ch3C4G5A6Ch7IBE\_Chabria\_IBEJG200997 NCBI  
--X-----X-XXX-CP1Ch3C4G5A6Bh7var\_Bhamoina\_varipes NCBI  
--X-----X-XXX-CP1Ch3C4G5A6IBEJG\_Galerucinae\_IBEJG201000 NCBI  
--X-----X-XXX-CP1Ch3C4G5A6Argo7bid\_Argopus\_bidentatus NCBI  
-----XXXXXX-CP1Ch3 Chrysomeloidea\_sp10\_ChrysoT.idba.69\_MMG\_ANNOT\_FROM\_TREE  
--X-----X-XXX-CP1Ch3C4G5A6Pe7nig\_Pentamesa\_nigrofasciata NCBI  
--XXXXXXXXXXXXXXXX-CP1Ch3C4G5Sp7\_Sphaeroderma\_sp\_CS.idba.54\_MMG\_ANNOT\_FROM\_BARCODE  
--XXXXXXXXXXXXXXXX-XX-CP1Ch3C4G5Sp7Rub\_Sphaeroderma\_rubidum\_ChrysoT.idba.27\_MERGED\_MMG\_ANNOT\_FROM\_BARCODE  
--X-----X-XXX-CP1Ch3C4G5Sp7tes\_Sphaeroderma\_testaceum NCBI  
XXXXXXXXXXXXXXXXXXXX-CP1Ch3C4G5\_Galerucinae\_sp1\_ChrysoT.idba.11\_MMG\_ANNOT\_FROM\_TREE  
--X-----XX-CP1Ch3C4G5Ma7sim\_Manobidia\_simplicithorax NCBI  
--X-----XX-XXX-CP1Ch3C4G5RK0164\_Galerucinae\_RK0164 NCBI  
--X-----X-XXX-CP1Ch3C4G5A6Arg7bip\_Argopistes\_biplagiatus NCBI  
XXXXXXXXXXXXXXXXXXXX-CP1Ch3C4G5A6Arg7 Argopistes\_sp\_ChrysoT.idba.15\_MMG\_ANNOT\_FROM\_BARCODE  
XXXXXXXXXXXXXXXXXXXX-CP1Ch3C4G5A6Ap7orb\_Apteropoda\_orbiculata\_ChrysoT.idba.18\_MERGED\_MMG\_ANNOT\_FROM\_BARCODE  
XXXXXXXXXXXXXXXXXXXX-XX-CP1Ch3C4G5A6Ap7ovu\_Apteropoda\_ovulum\_ChrysoT.idba.23\_MERGED\_MMG\_ANNOT\_FROM\_BARCODE  
-----XXX-CP1Ch3C4G5A6Ja7835069\_Jacobyana\_835069 NCBI  
--X-----X-XX-CP1Ch3C4G5A6Dib7foe\_Dibolia\_foersteri NCBI  
--X-----X-XXX-CP1Ch3C4G5A6Dib7IBE\_Dibolia\_IBEJG200983 NCBI  
XXXXXXXXXXXXXXXXXXXX-XX-CP1Ch3C4G5A6Dib7occ\_Dibolia\_occultans\_ChrysoT.idba.132\_MERGED\_MMG\_ANNOT\_FROM\_BARCODE  
--X-----XX-CP1Ch3C4G5A6Dib7sch\_Dibolia\_schillingii NCBI  
XXXXXXXXXXXXXXXXXXXX-CP1Ch3C4G5A6Dib7rug\_Dibolia\_rugulosa\_ame.idba.94\_MERGED\_MMG\_ANNOT\_FROM\_BARCODE  
--X-----X-CP1Ch3C4G5A6Sys7bif\_Systema\_bifasciata NCBI  
--X-----X-XXX-CP1Ch3C4G5A6Sys7bla\_Systema\_blanda NCBI  
XXXXXXXXXXXXXXXXXXXX-XXX-CP1Ch3C4G5A6Aph7col\_Aphthonomorpha\_collaris\_ChrysoT.idba.34\_MERGED\_MMG\_ANNOT\_FROM\_BARCODE  
--X-----XX-CP1Ch3C4G5A6Aph7czw\_Aphthona\_czwalinae NCBI  
--X-----XX-CP1Ch3C4G5A6Aph77cyP\_Aphthona\_cyprissiae NCBI  
--X-----X-XXX-CP1Ch3C4G5A6Aph77fla\_Aphthona\_flava NCBI  
--X-----X-XX-CP1Ch3C4G5A6Aph77dep\_Aphthona\_depressa NCBI  
--X-----X-X-CP1Ch3C4G5A6G17cya\_Glyptina\_cyanipennis NCBI  
XXXXXXXXXXXXXXXXXXXX-CP1Ch3C4G5A6Aph77lut\_Aphthona\_lutescens\_ChrysoT.idba.103\_MERGED\_MMG\_ANNOT\_FROM\_BARCODE  
XXXXXXXXXXXXXXXXXXXX-XX-CP1Ch3C4G5A6Aph77eup\_Aphthona\_euphorbiae\_ChrysoT.idba.42\_MERGED\_MMG\_ANNOT\_FROM\_BARCODE  
--X-----X-XXX-CP1Ch3C4G5A6Aph77str\_Aphthona\_strigosa NCBI  
XXXXXXXXXXXXXXXXXXXX-XX-CP1Ch3C4G5A6Aph77alb\_Aphthona\_albertinae\_ChrysoT.idba.48\_MERGED\_MMG\_ANNOT\_FROM\_BARCODE



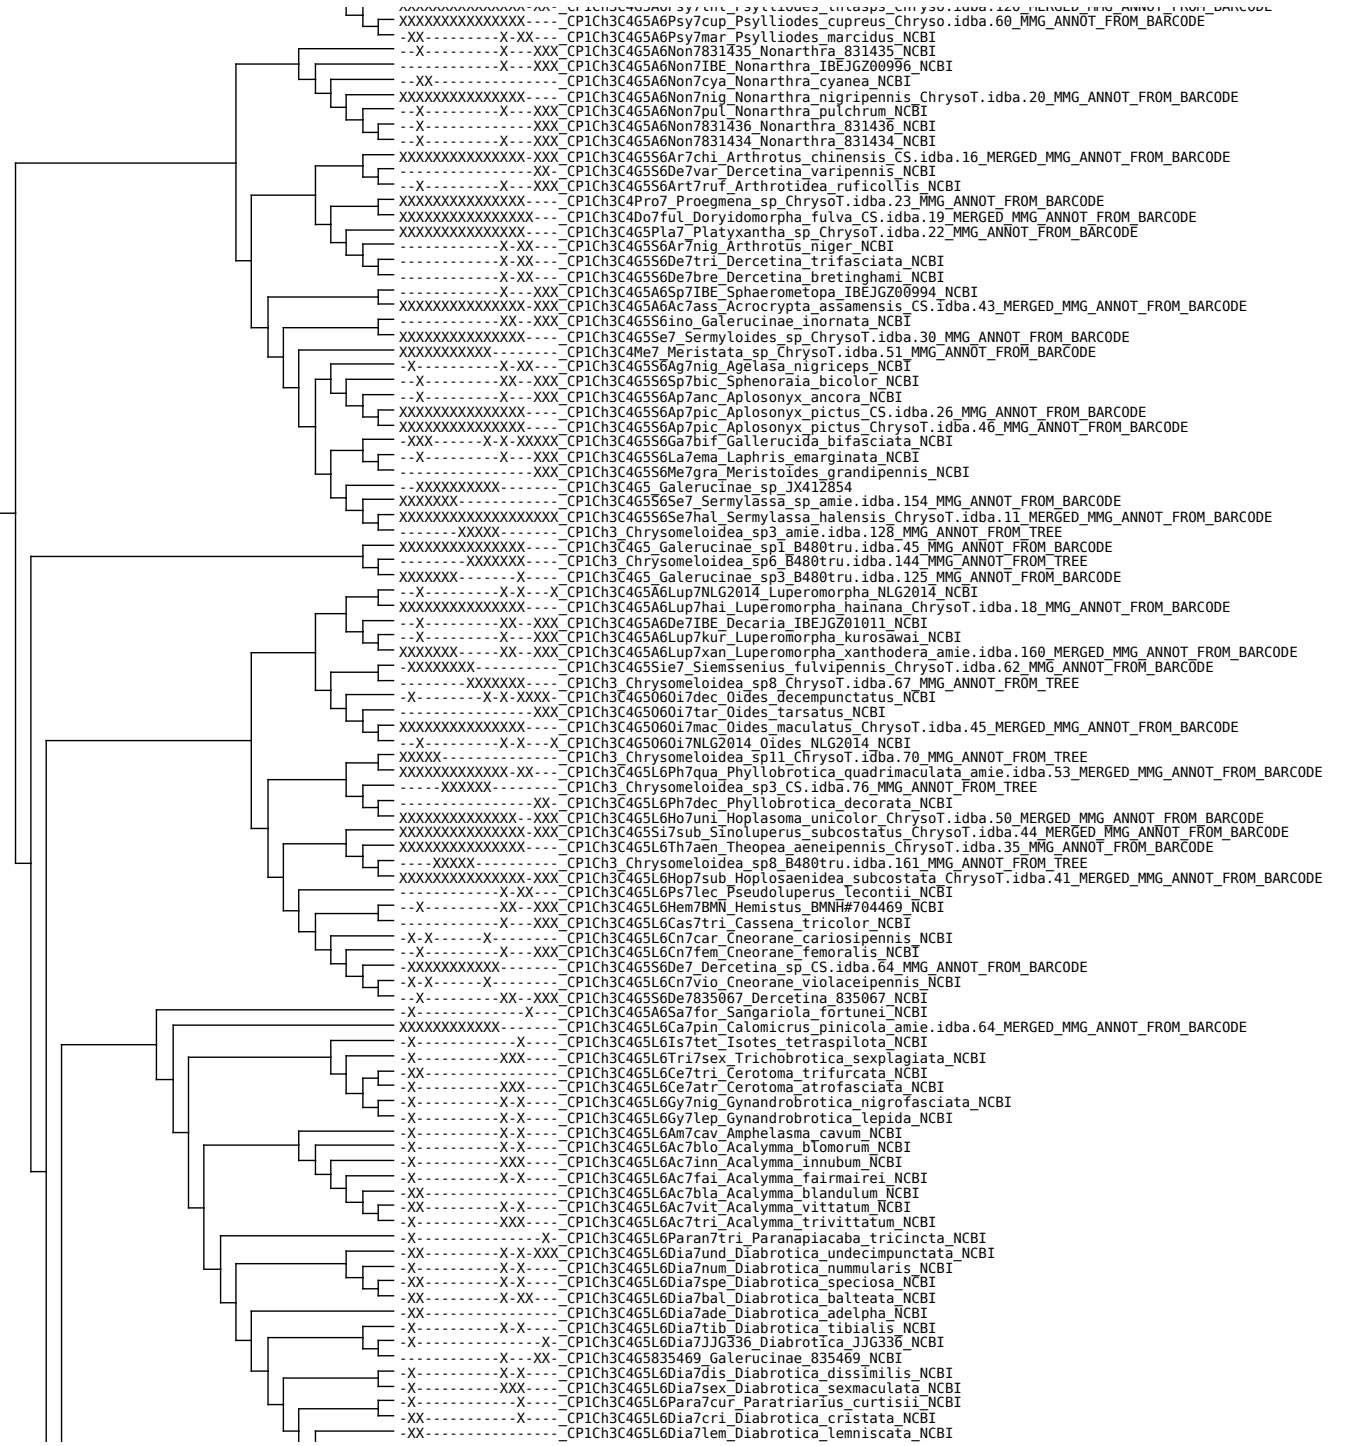

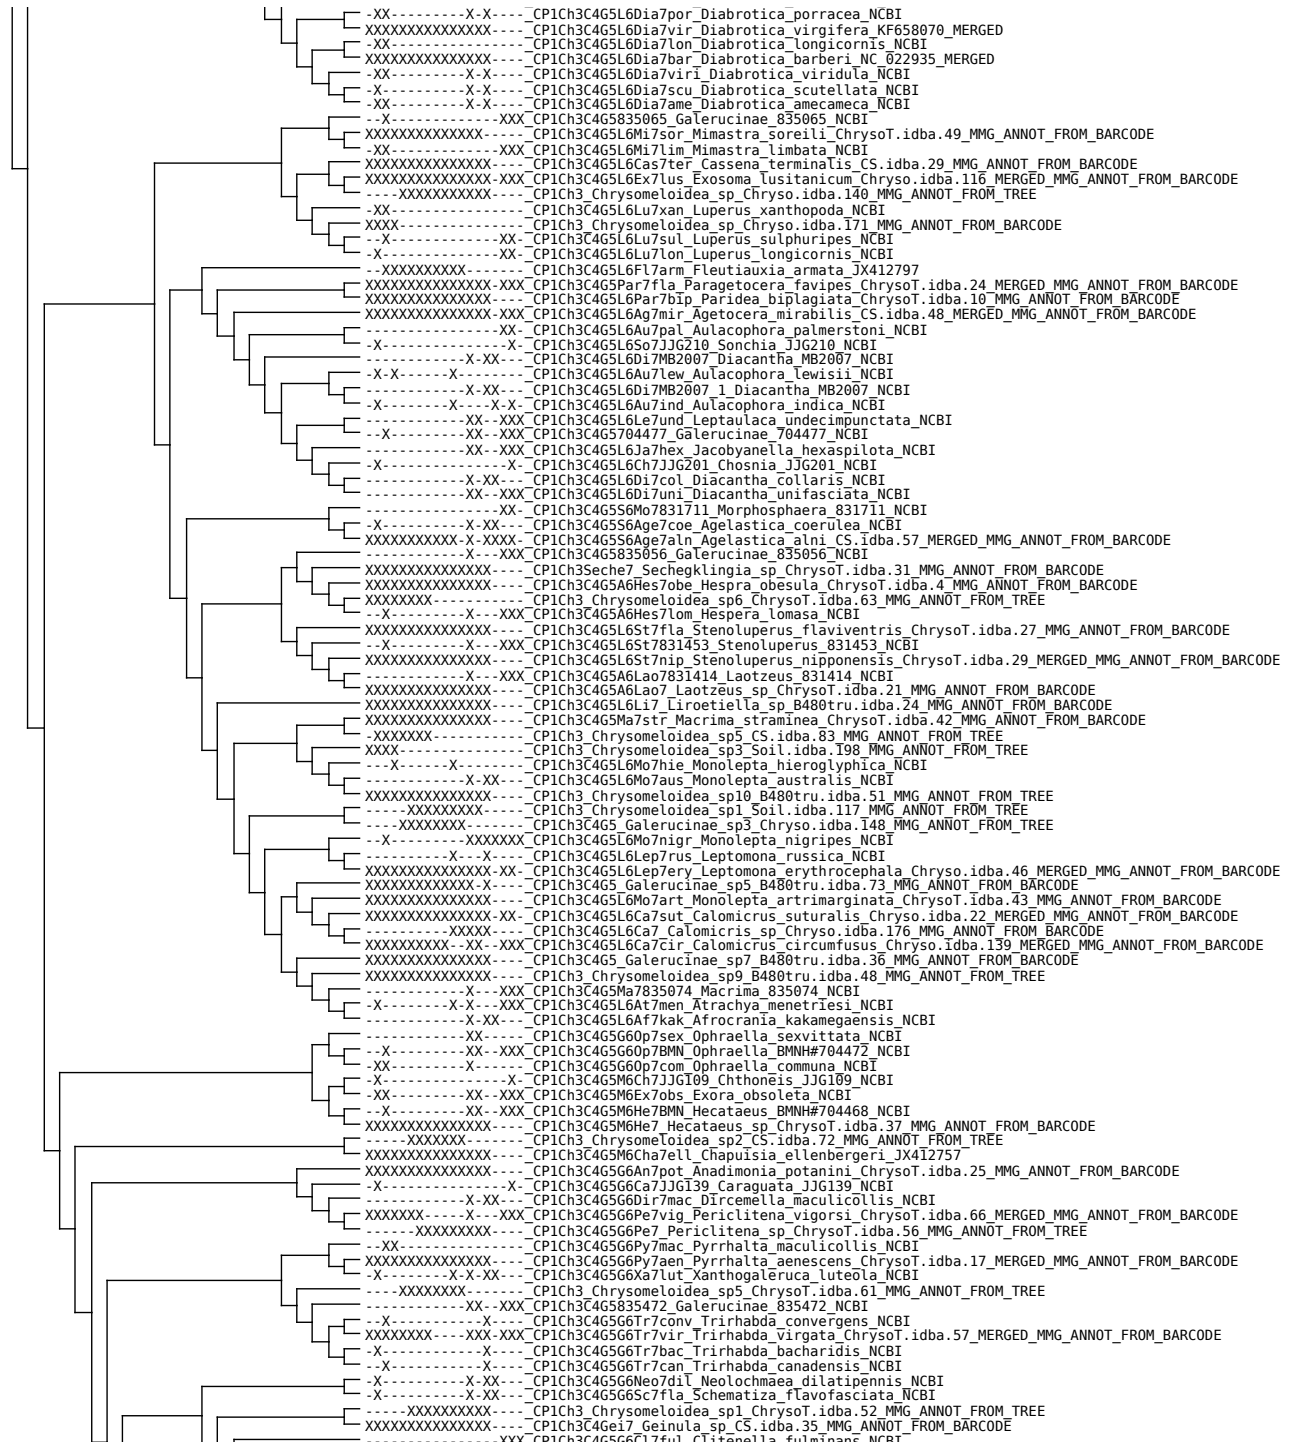



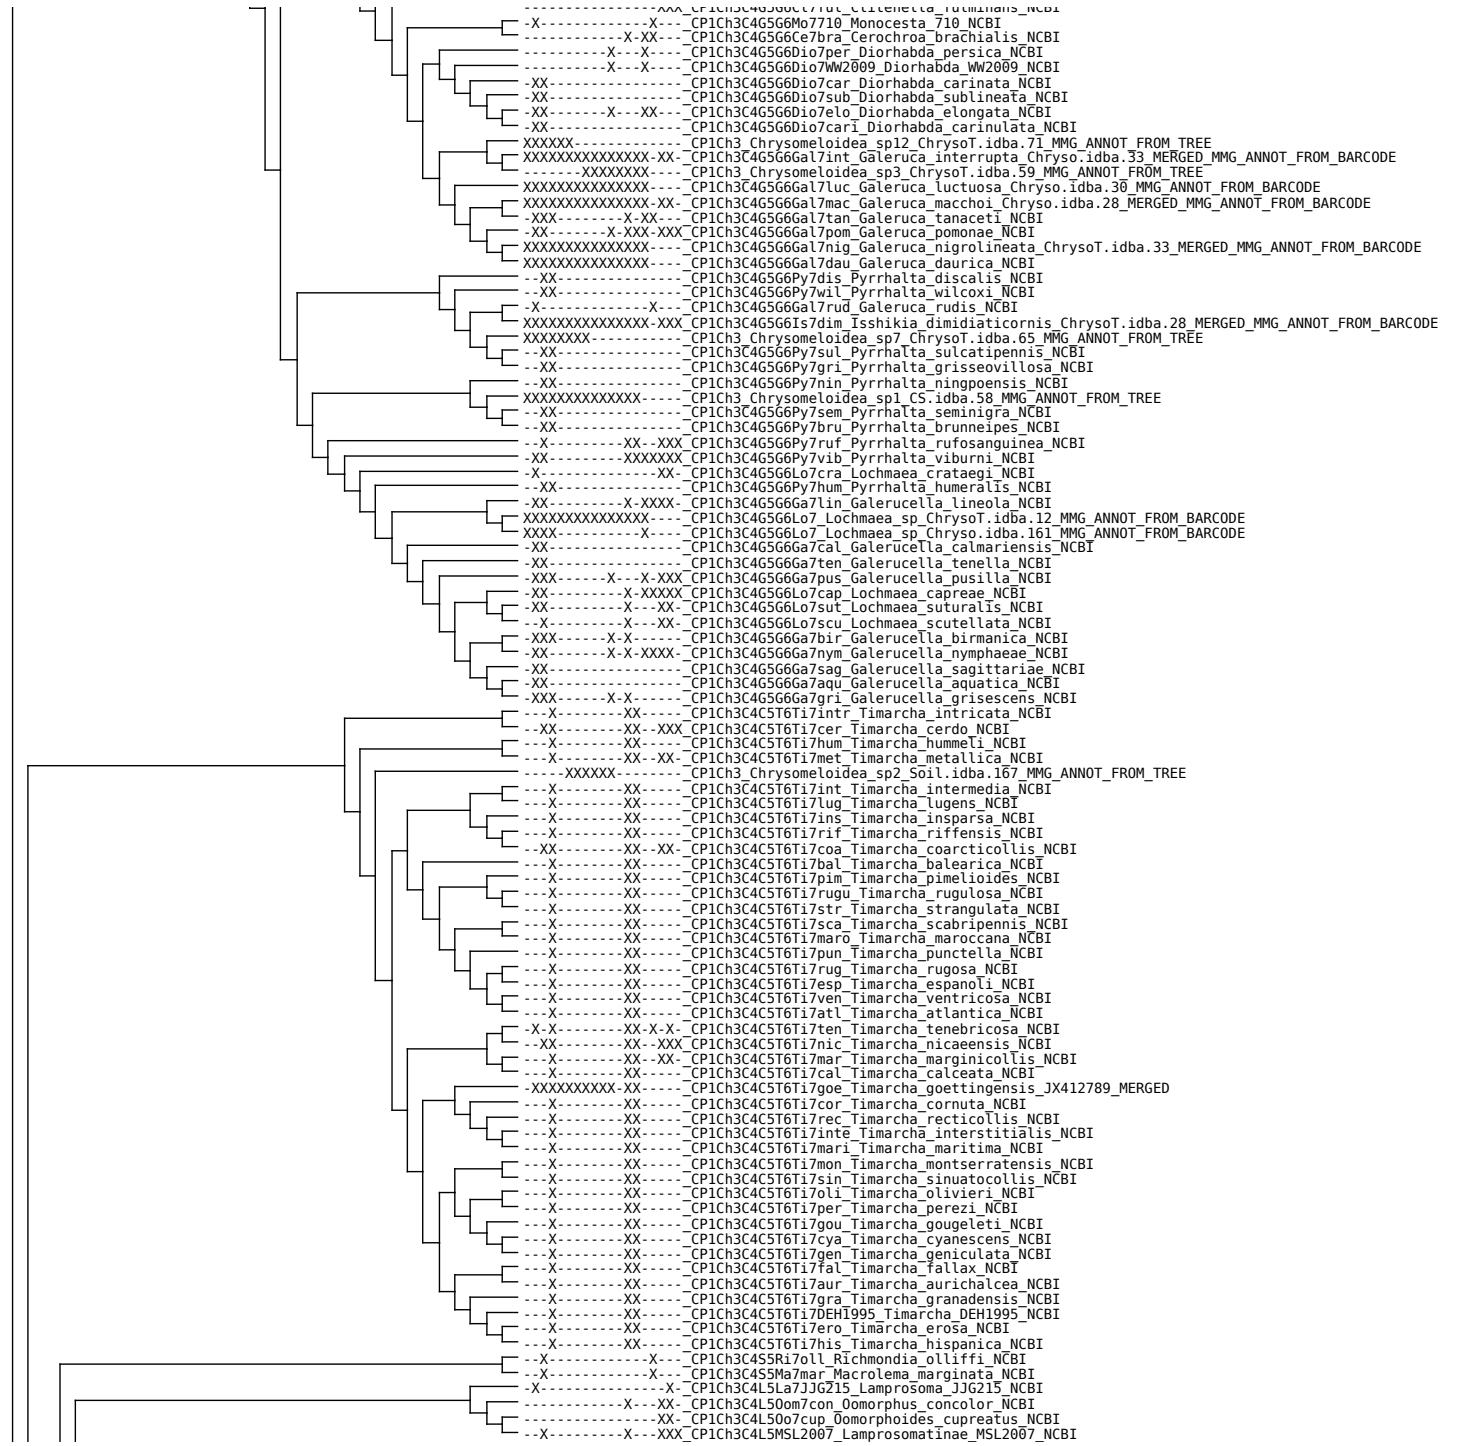

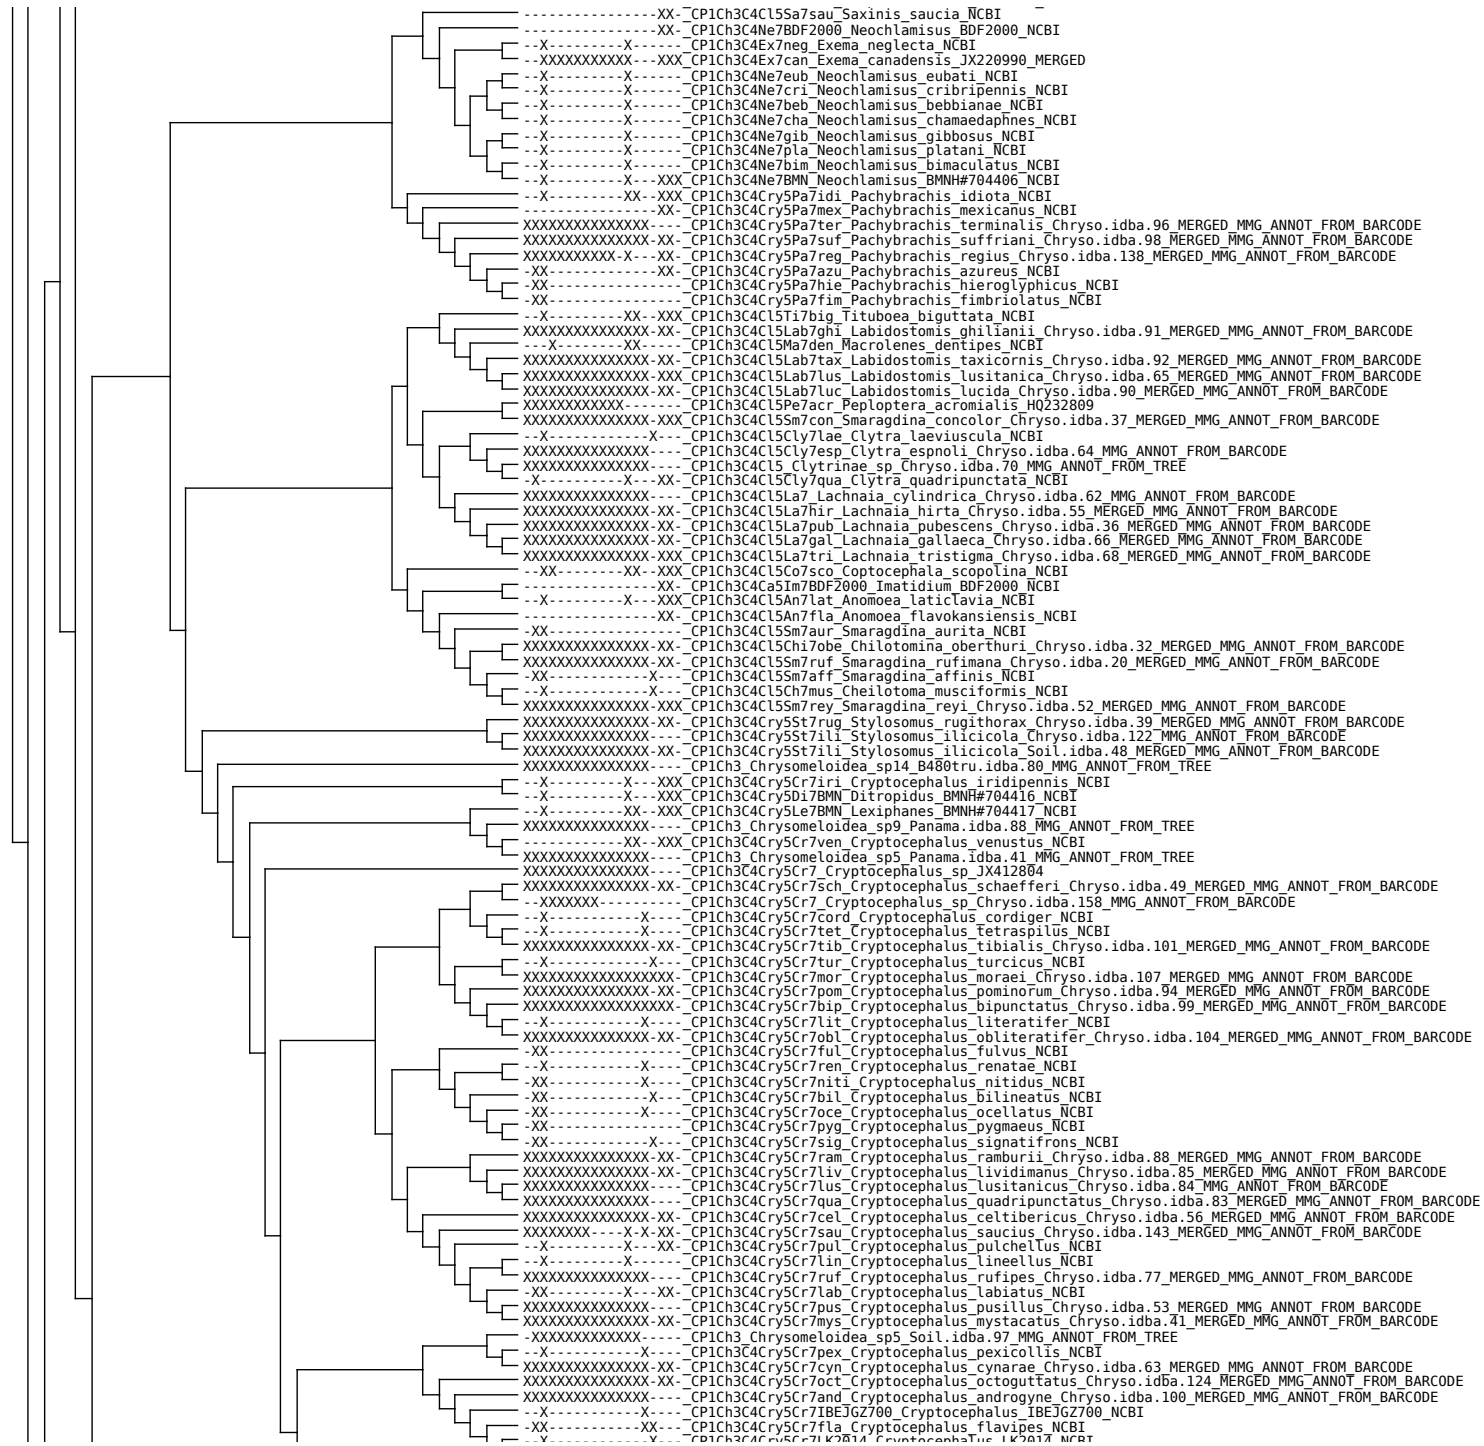

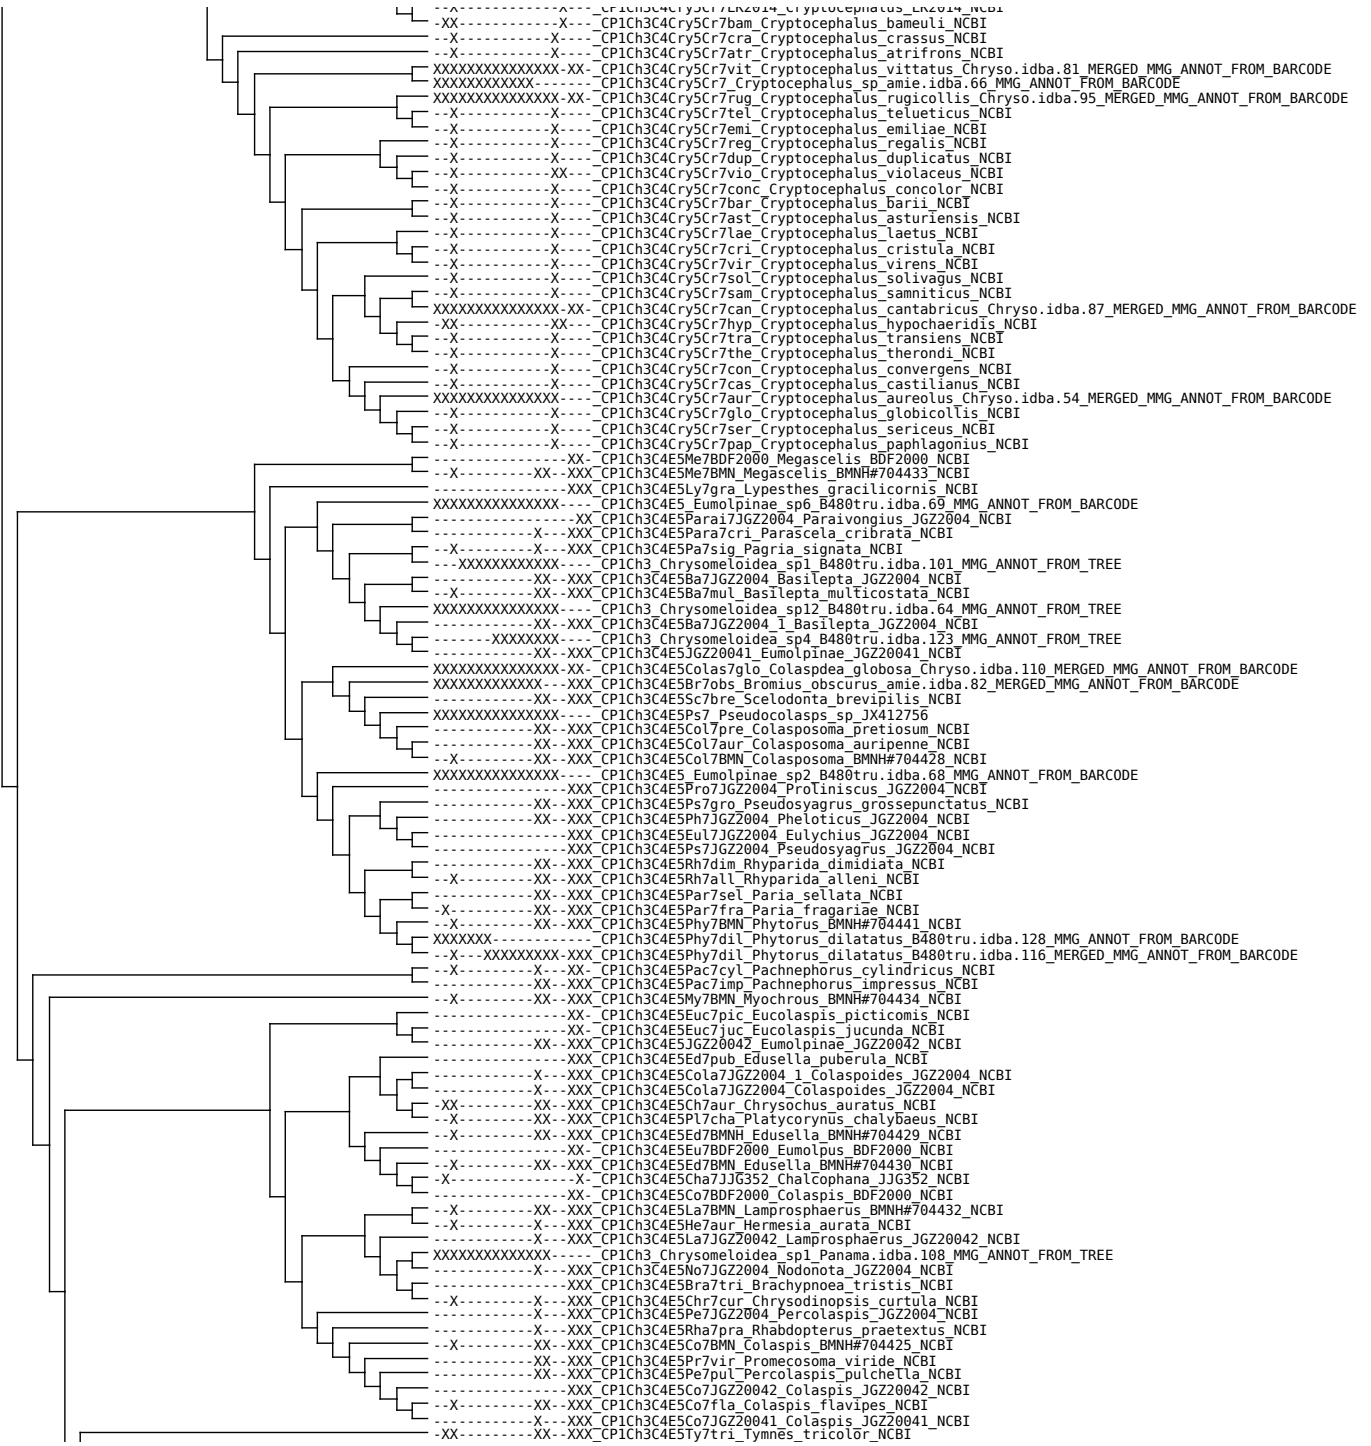

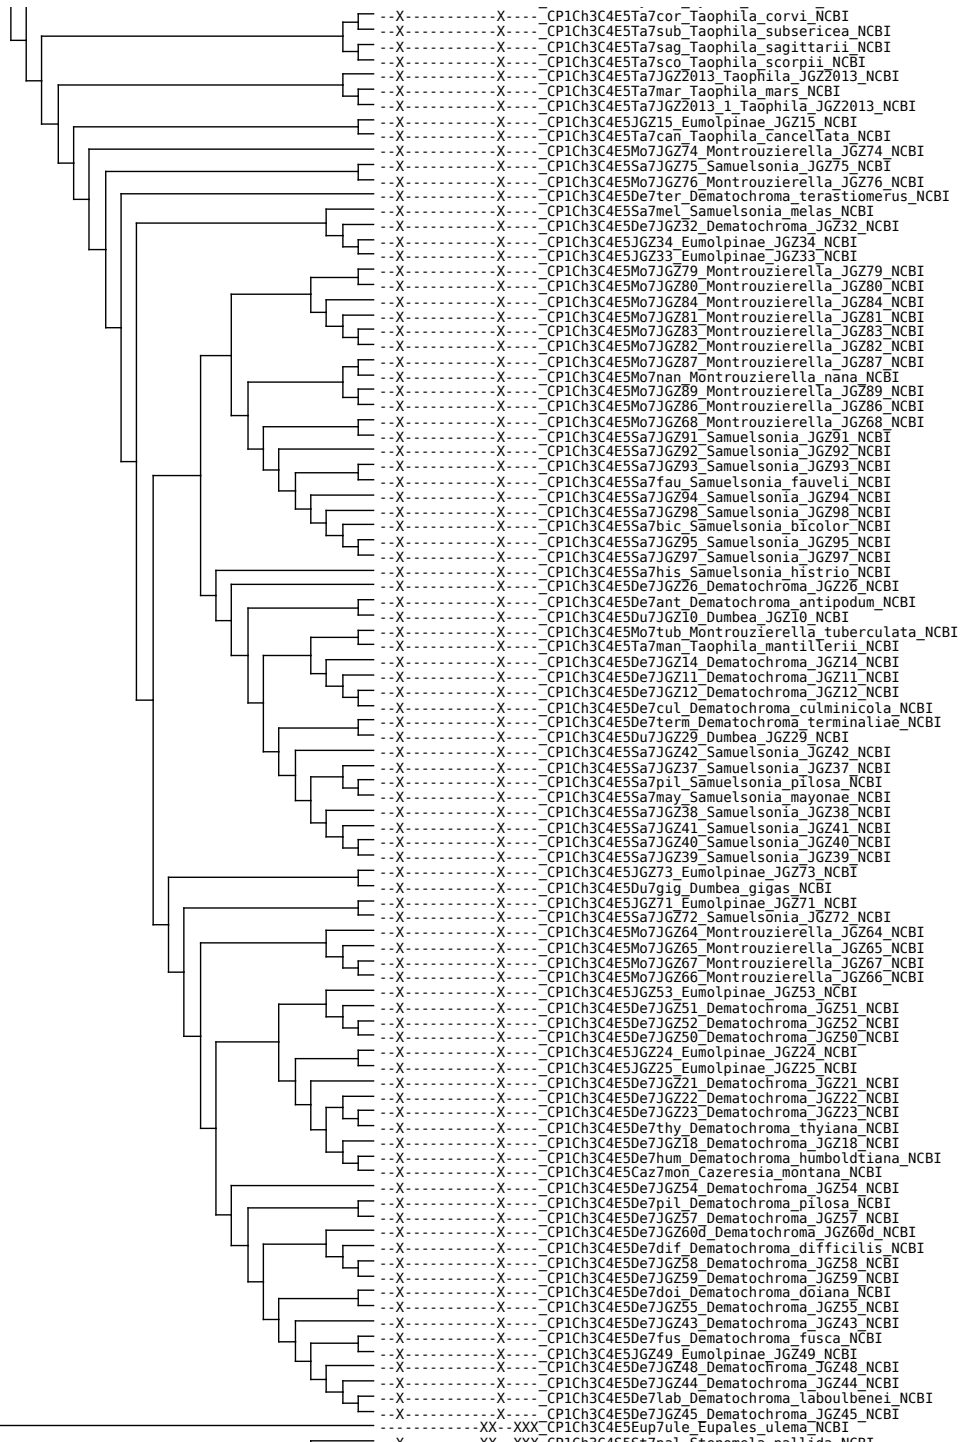

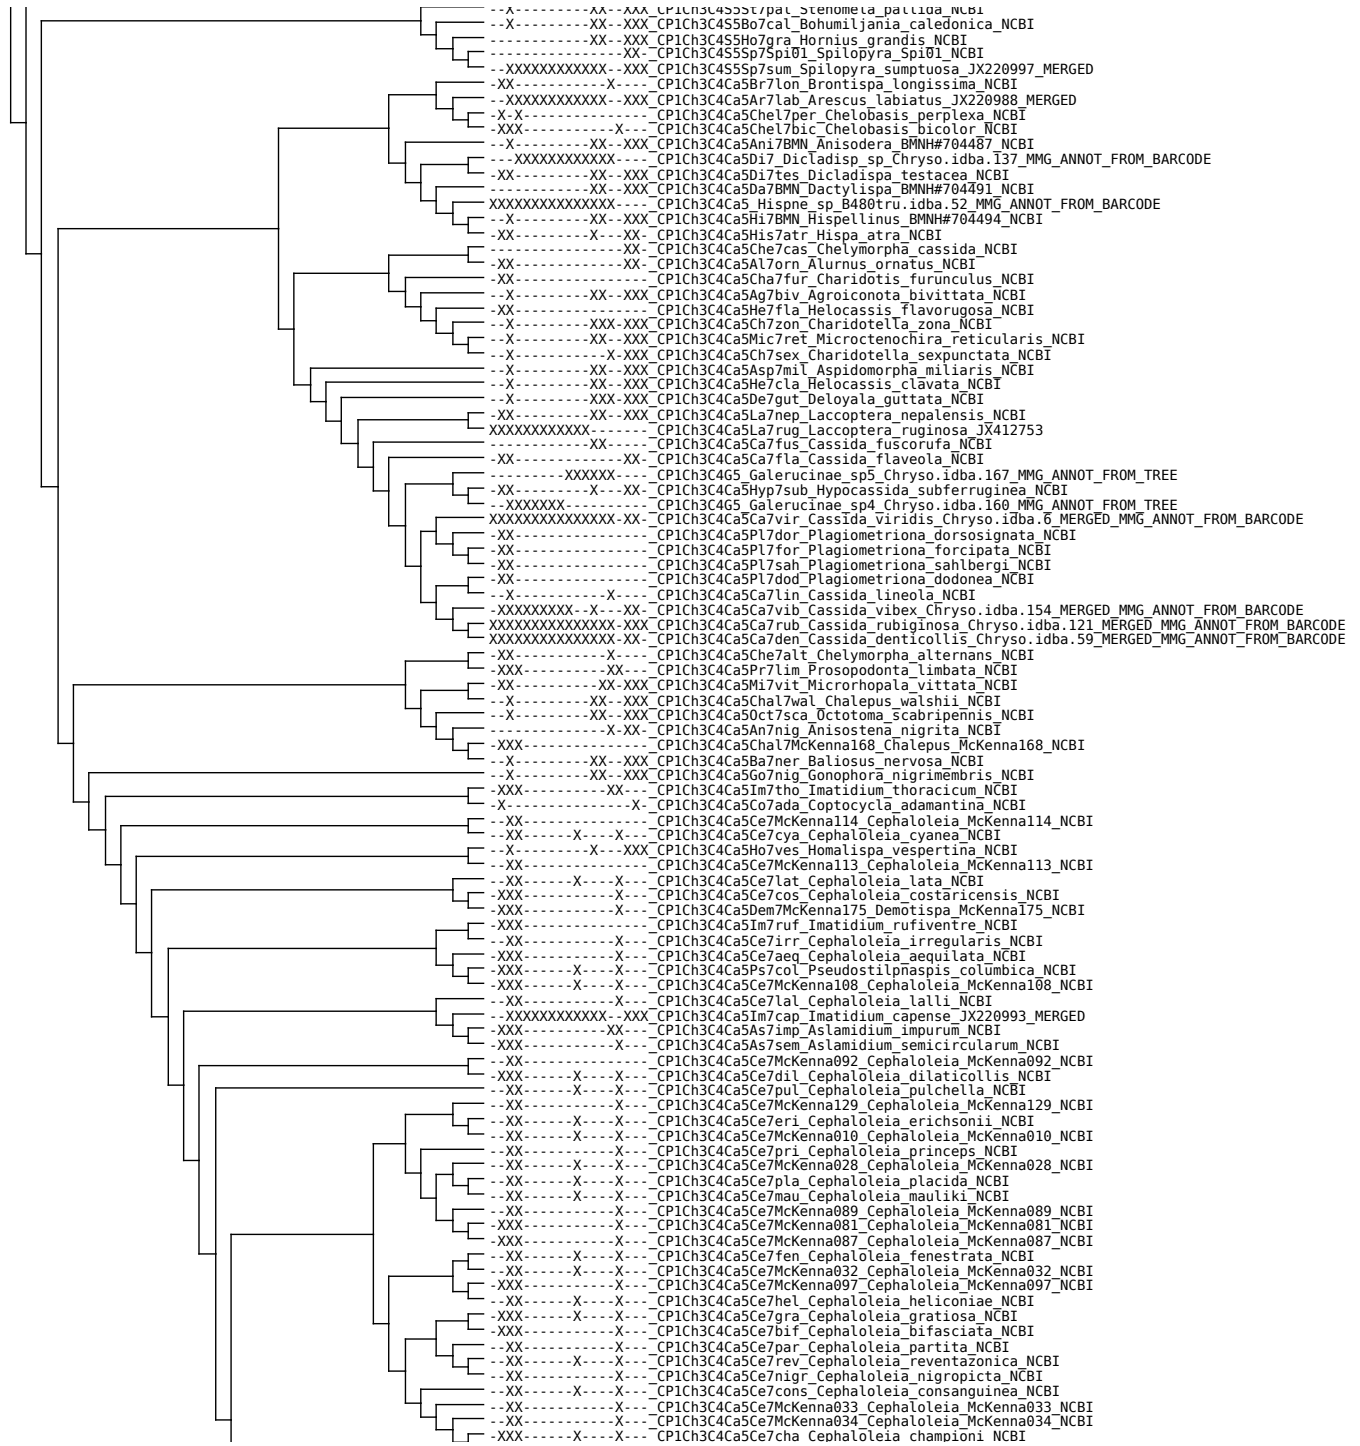



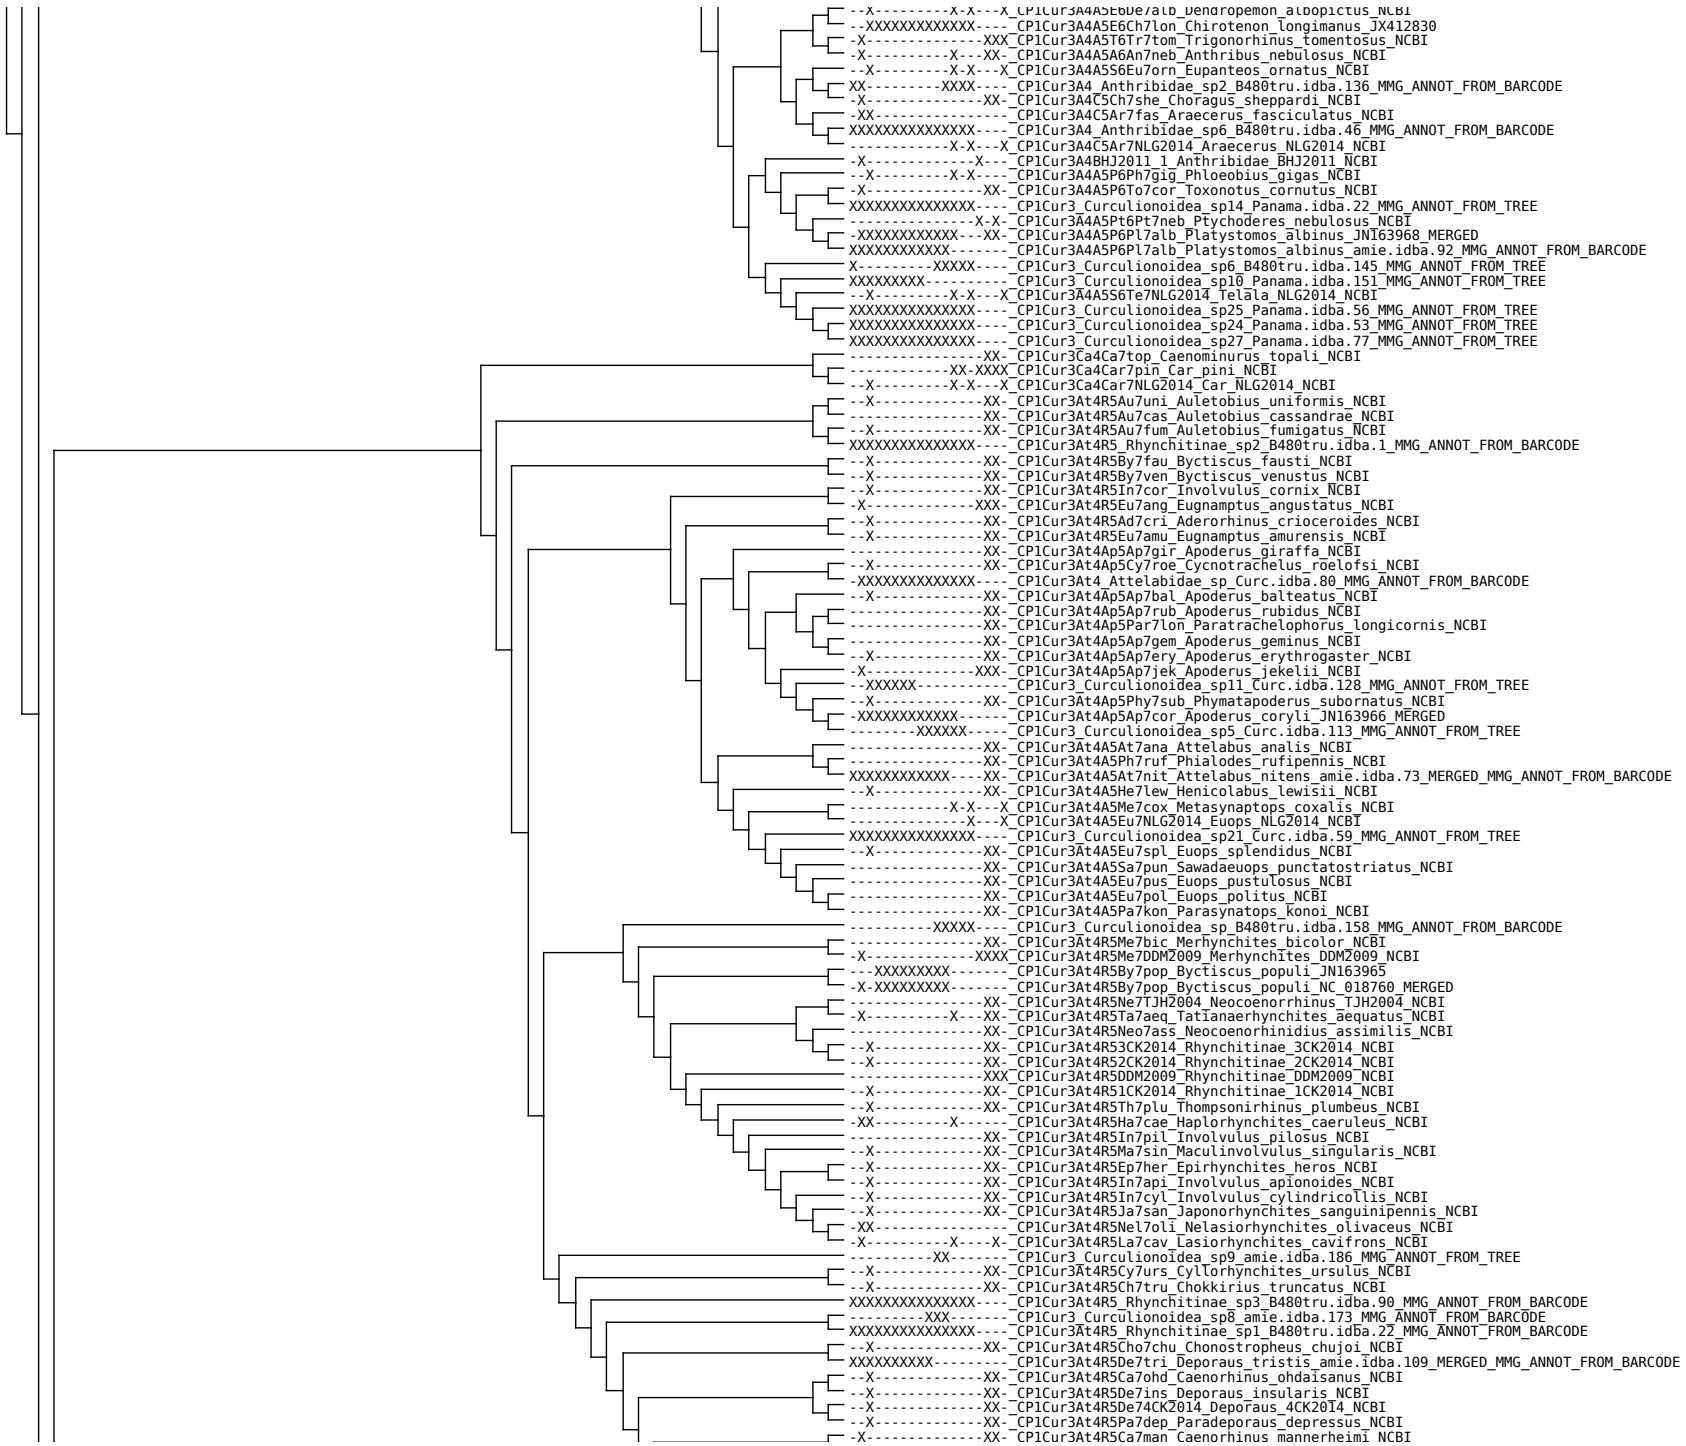

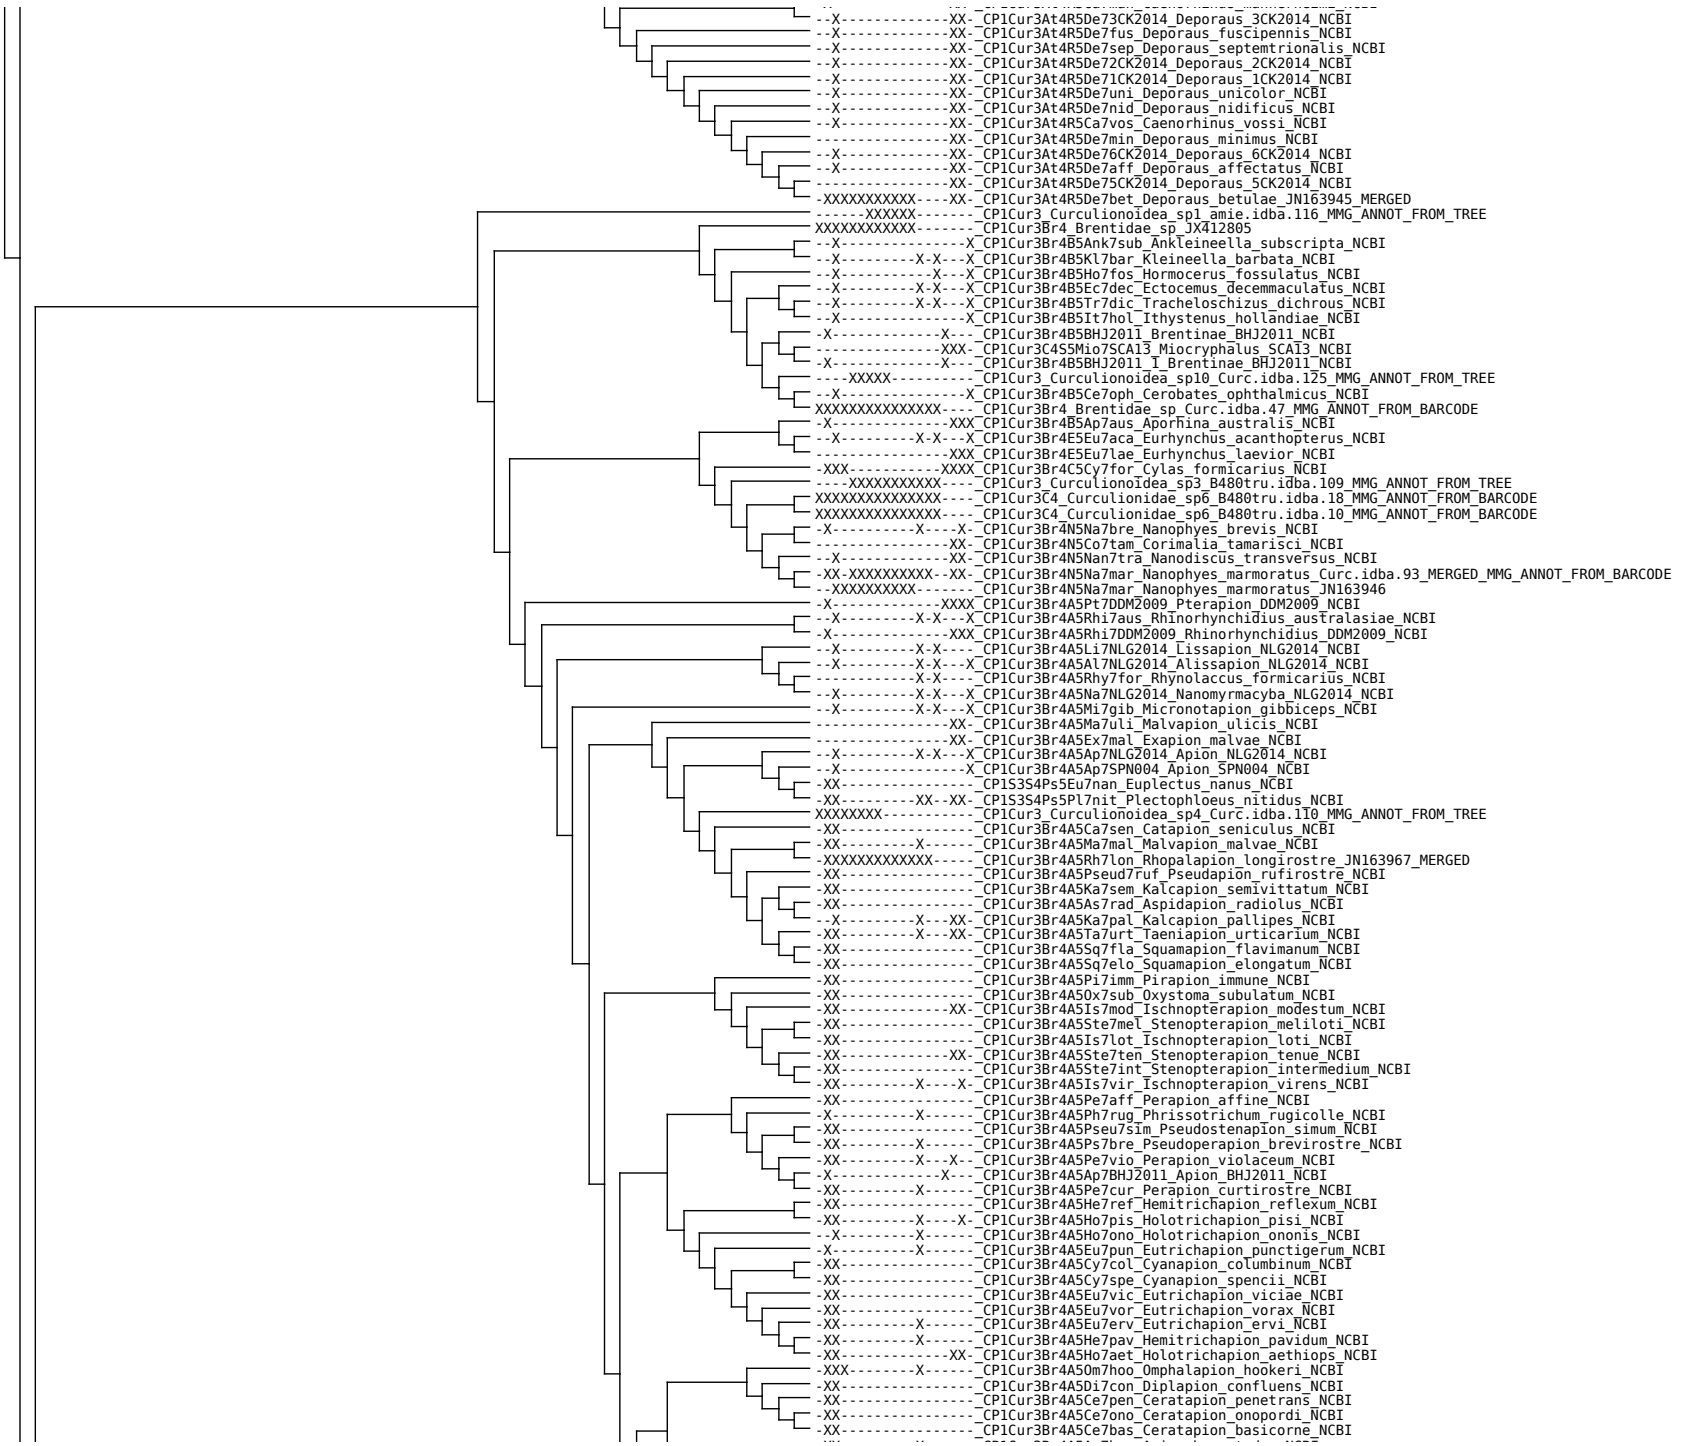



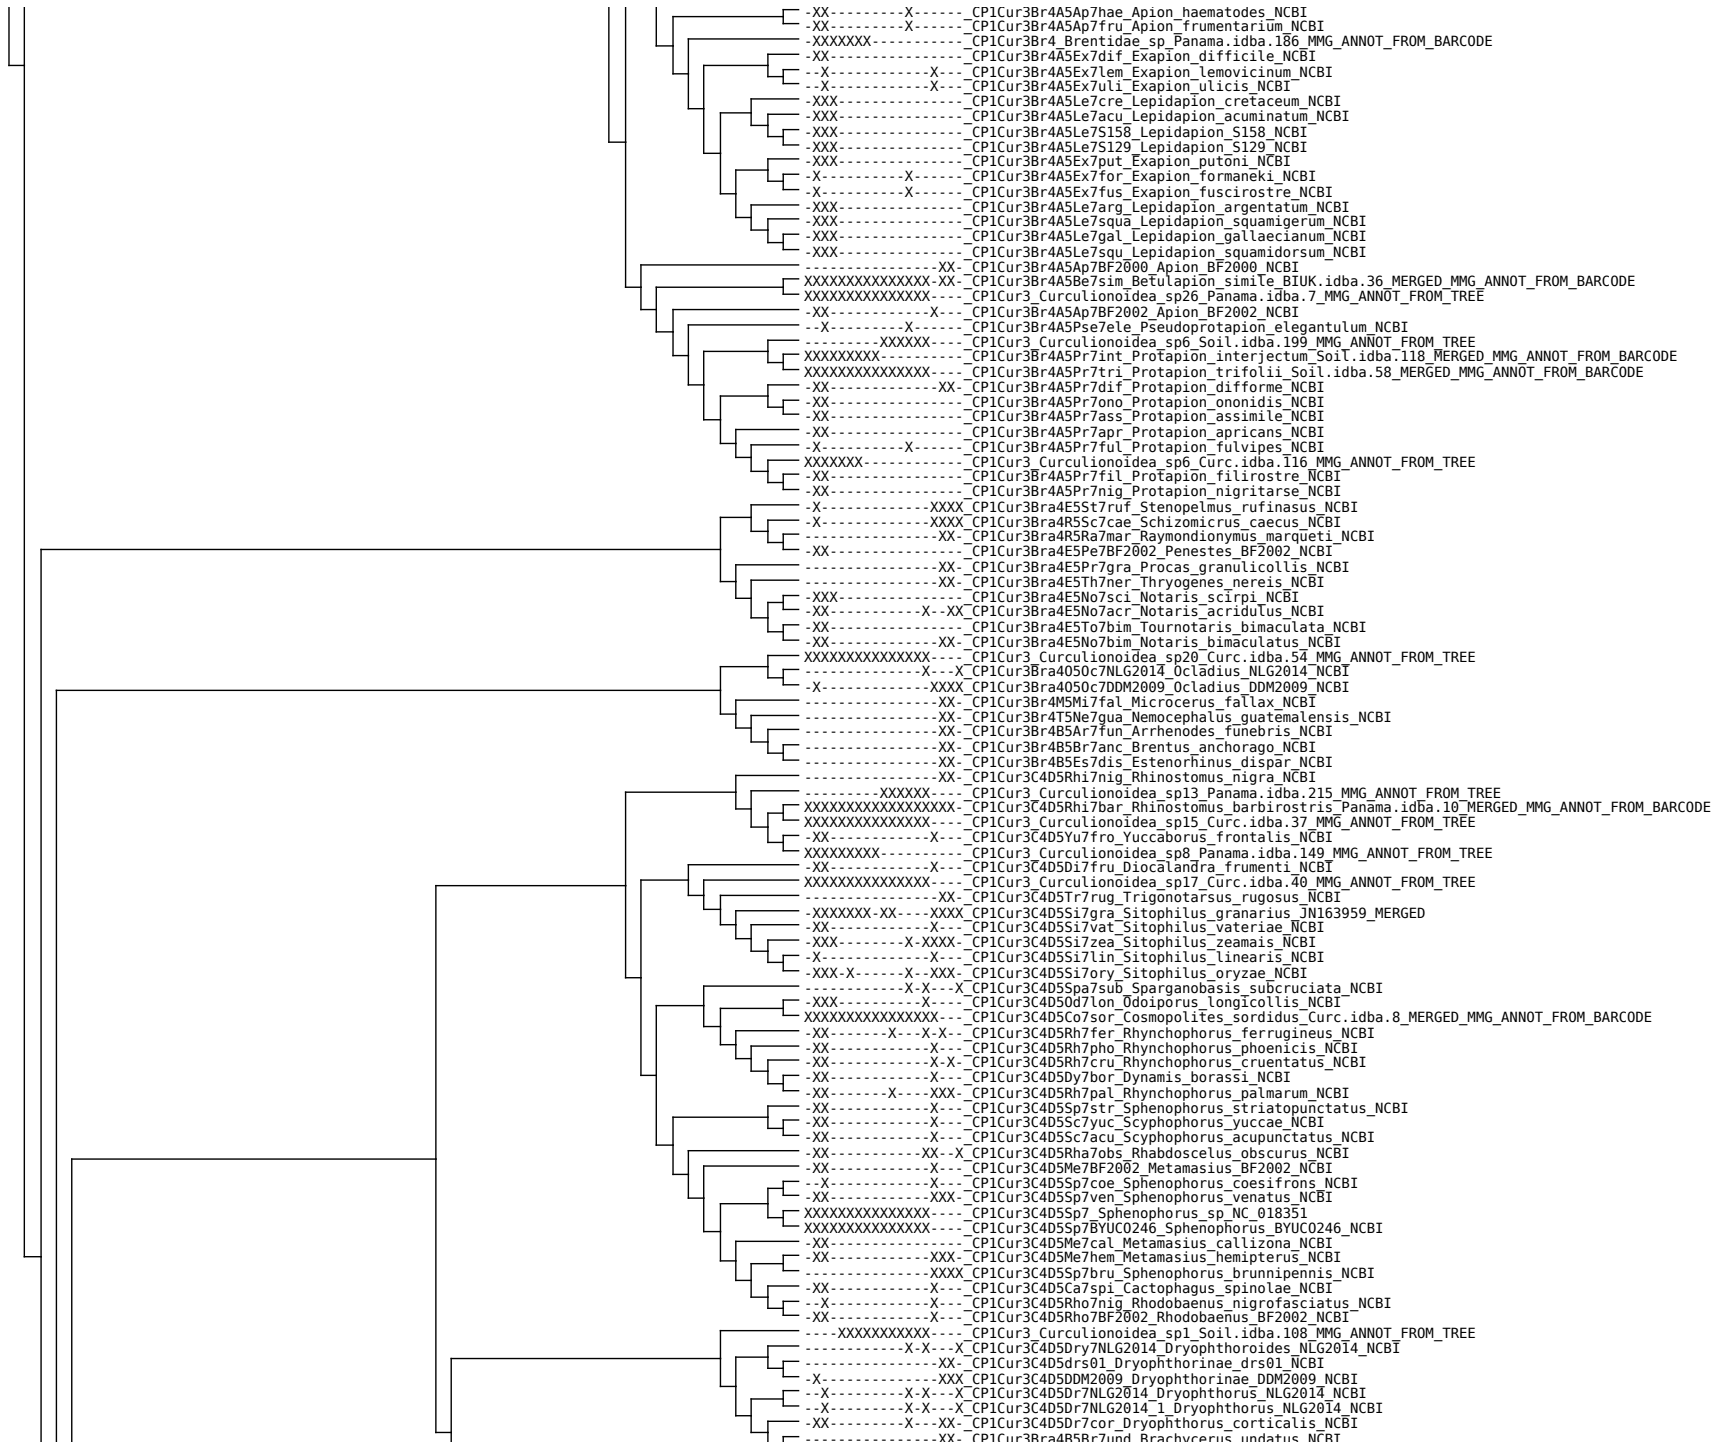



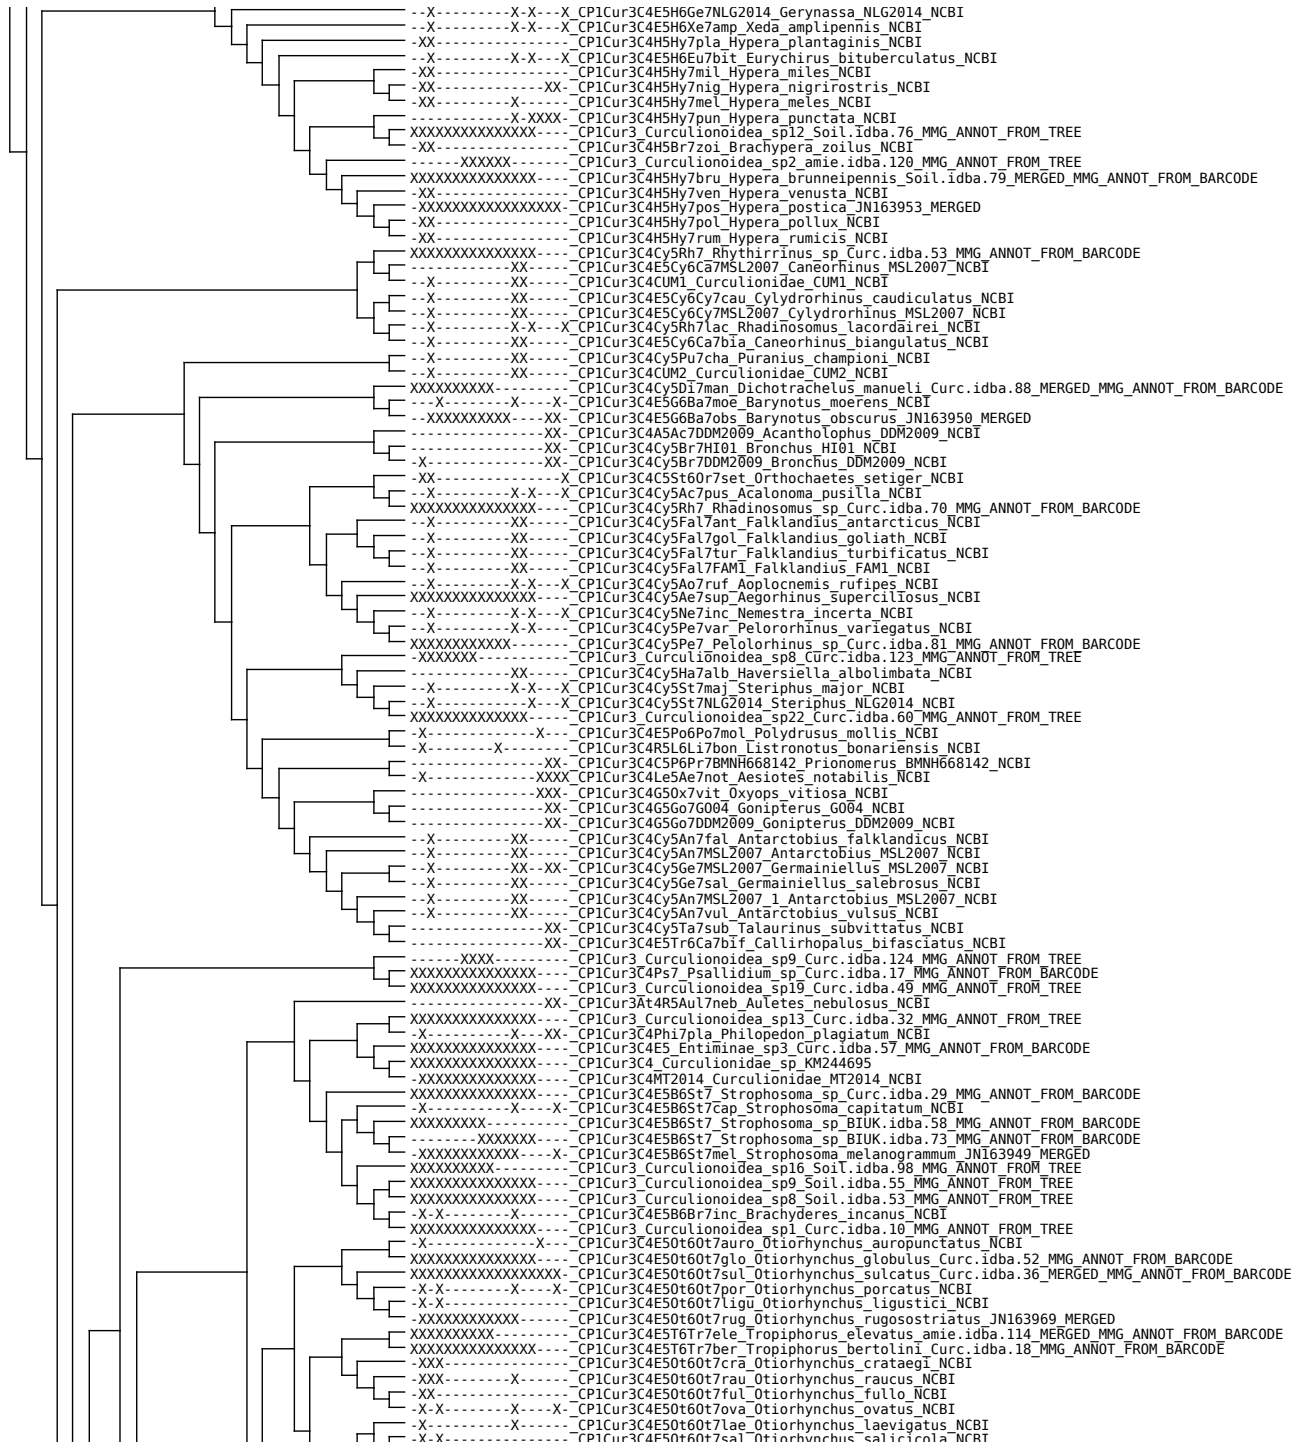

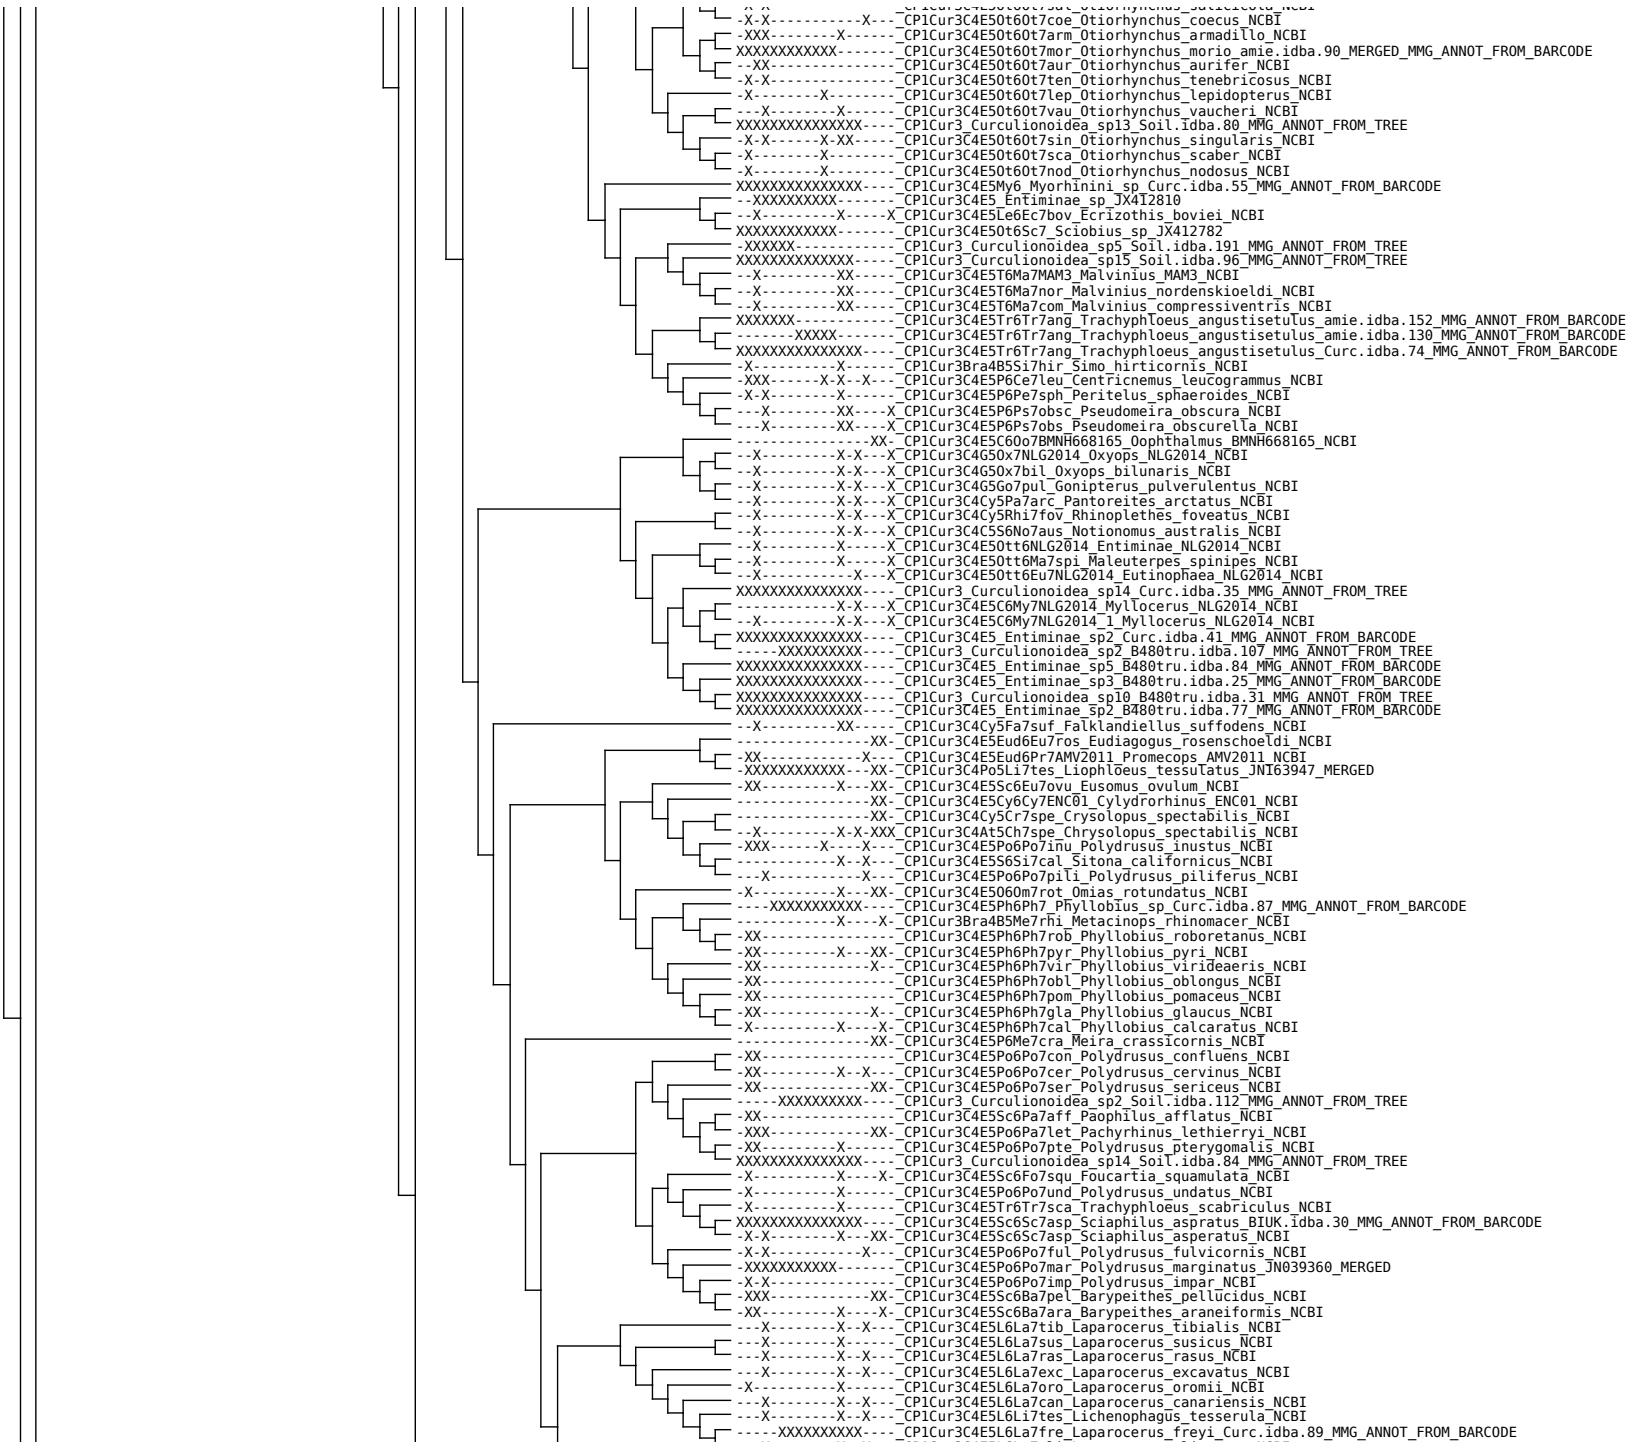

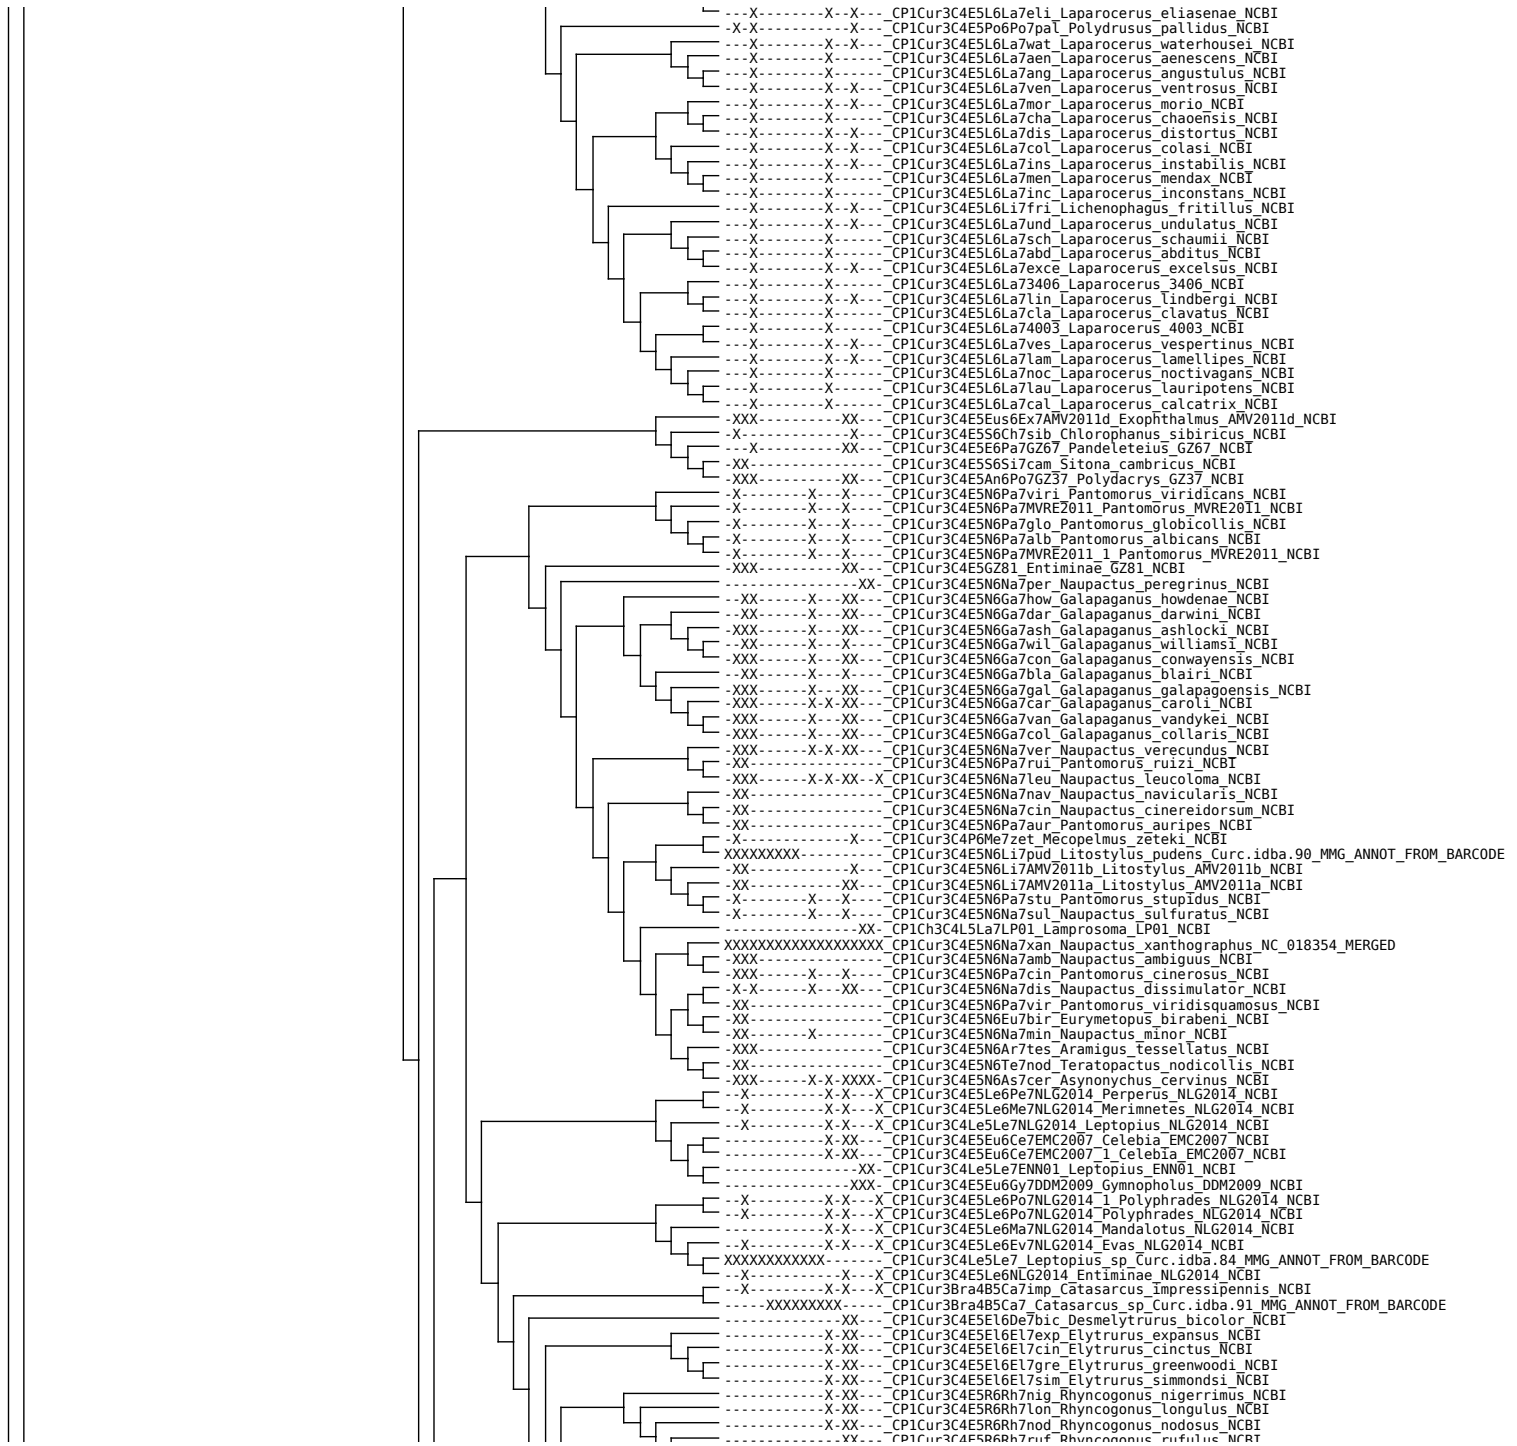



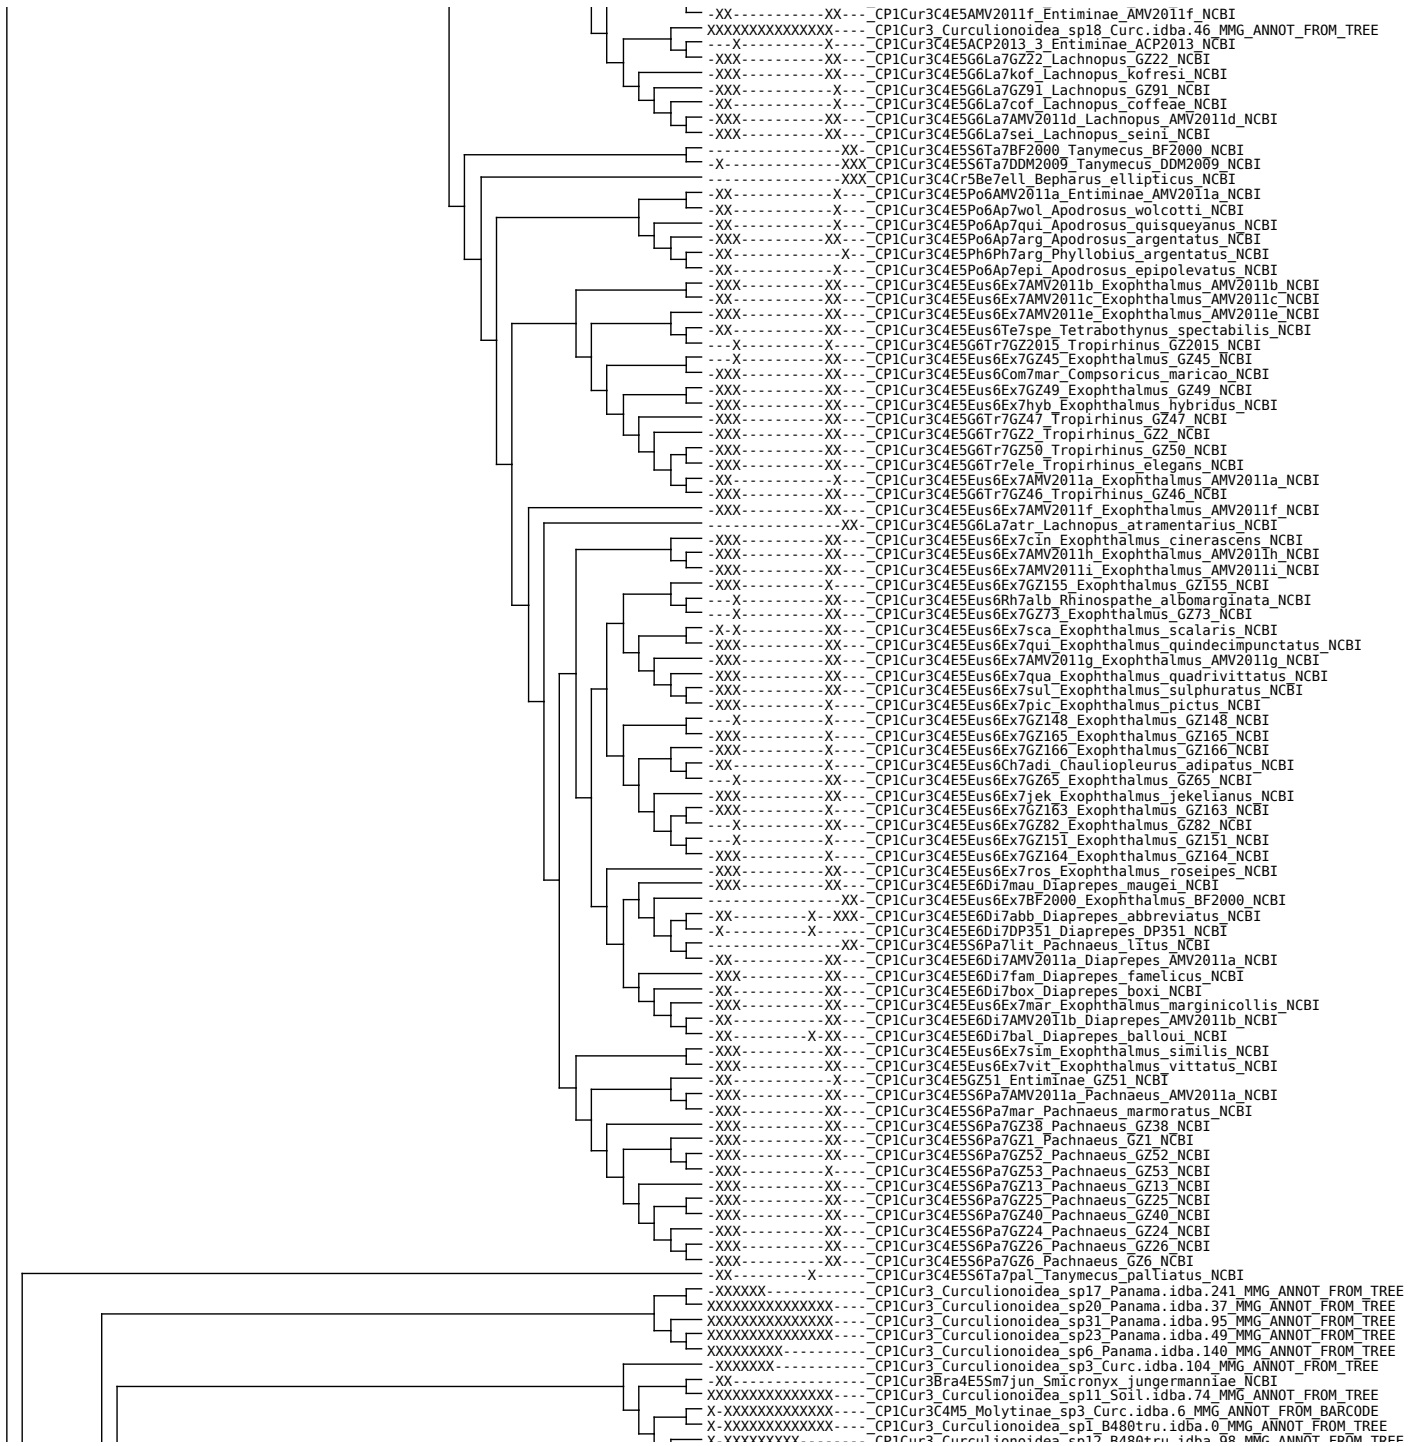

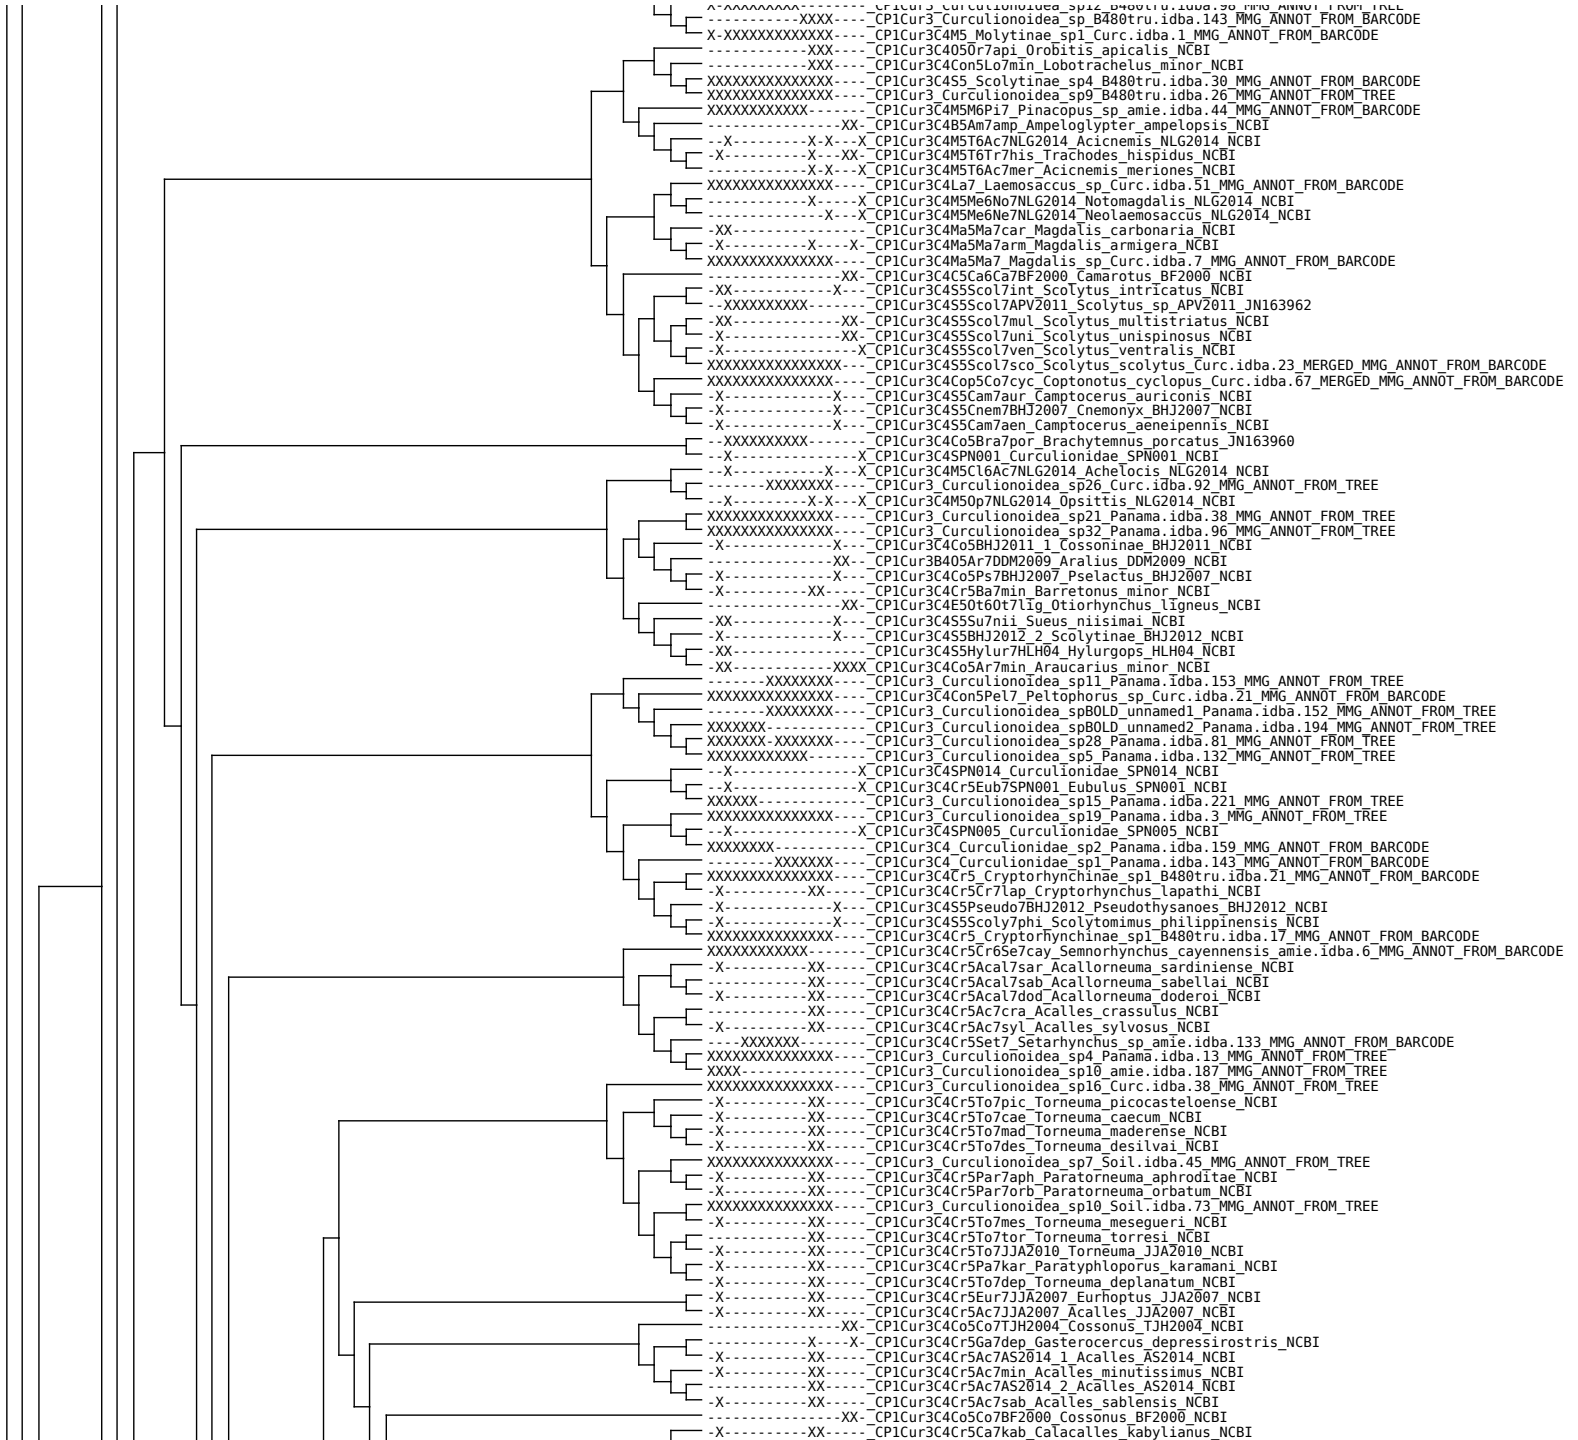



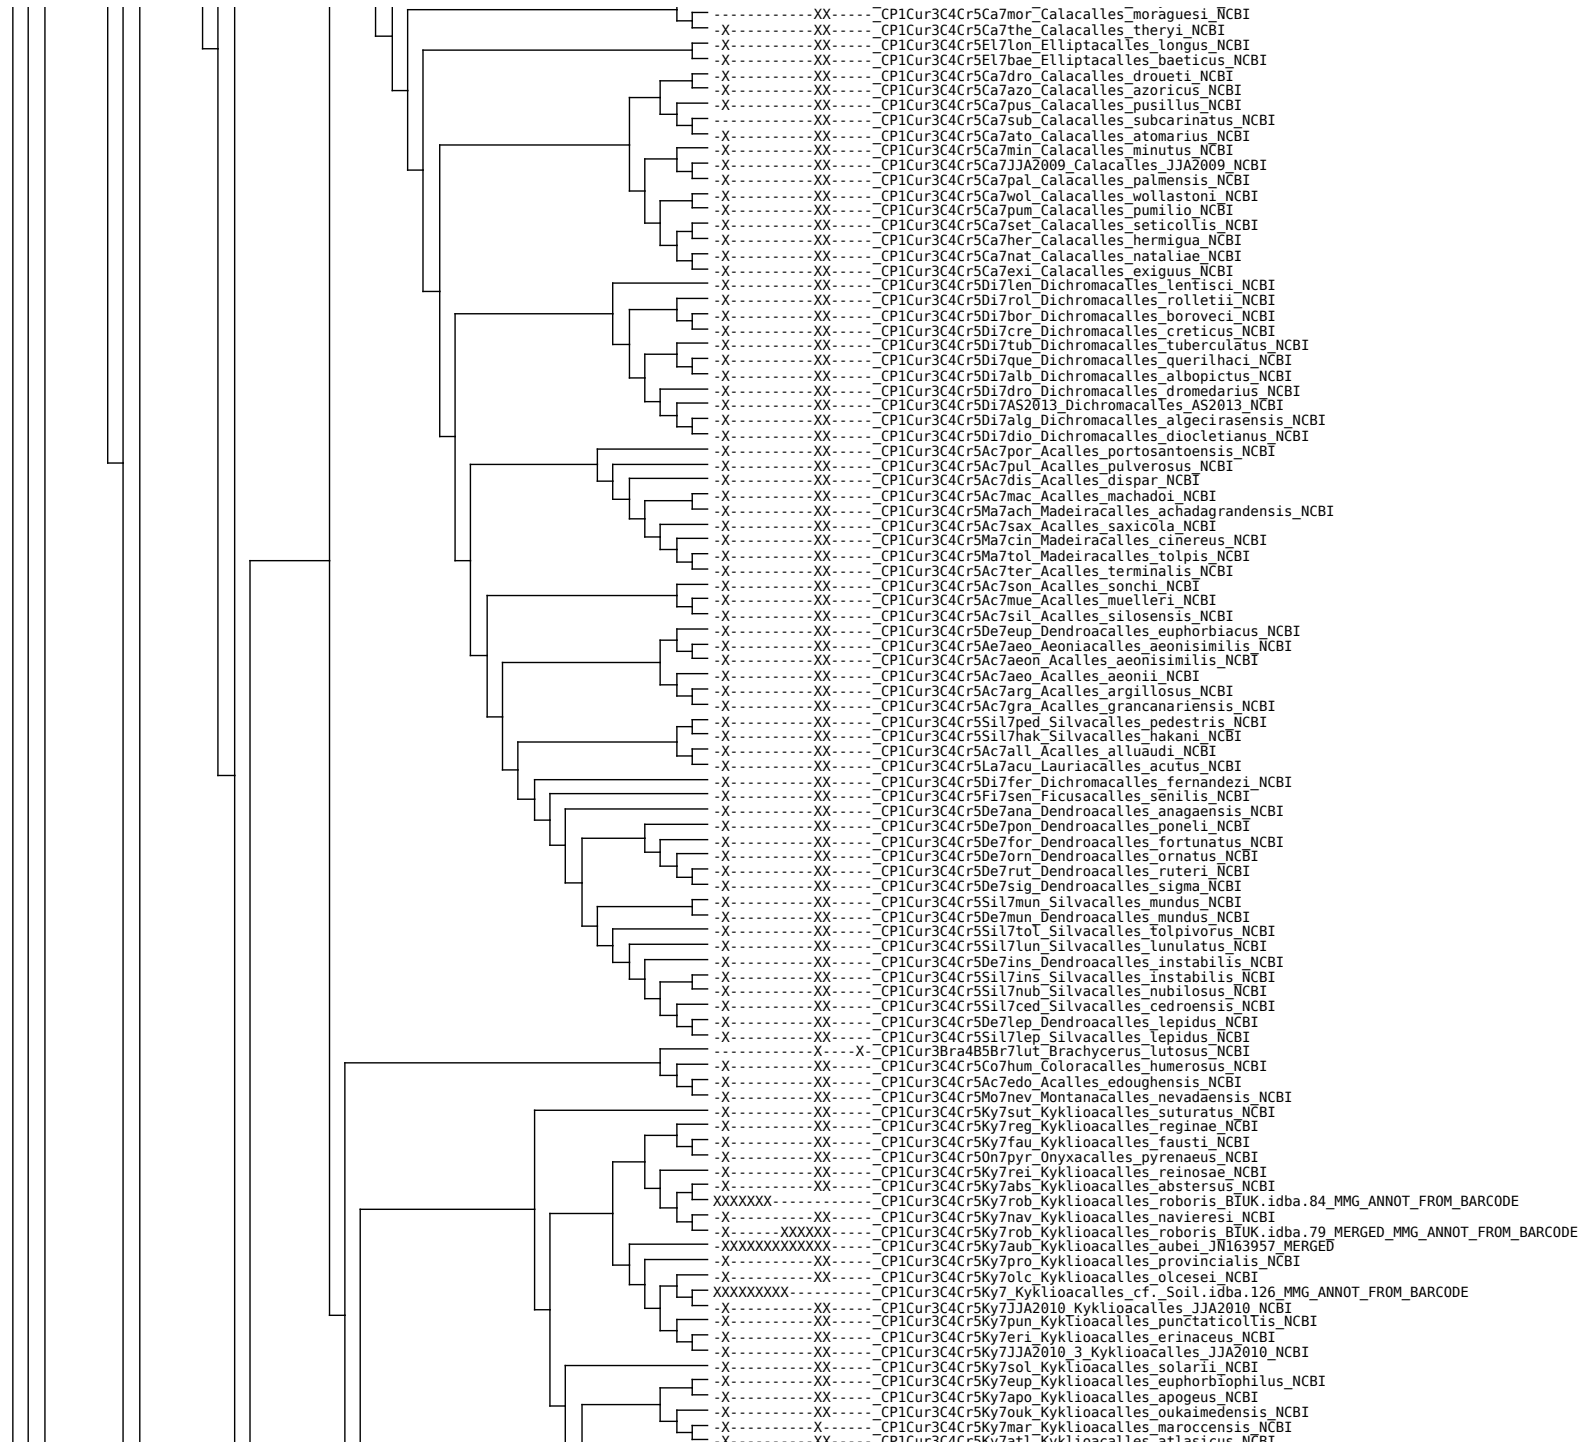

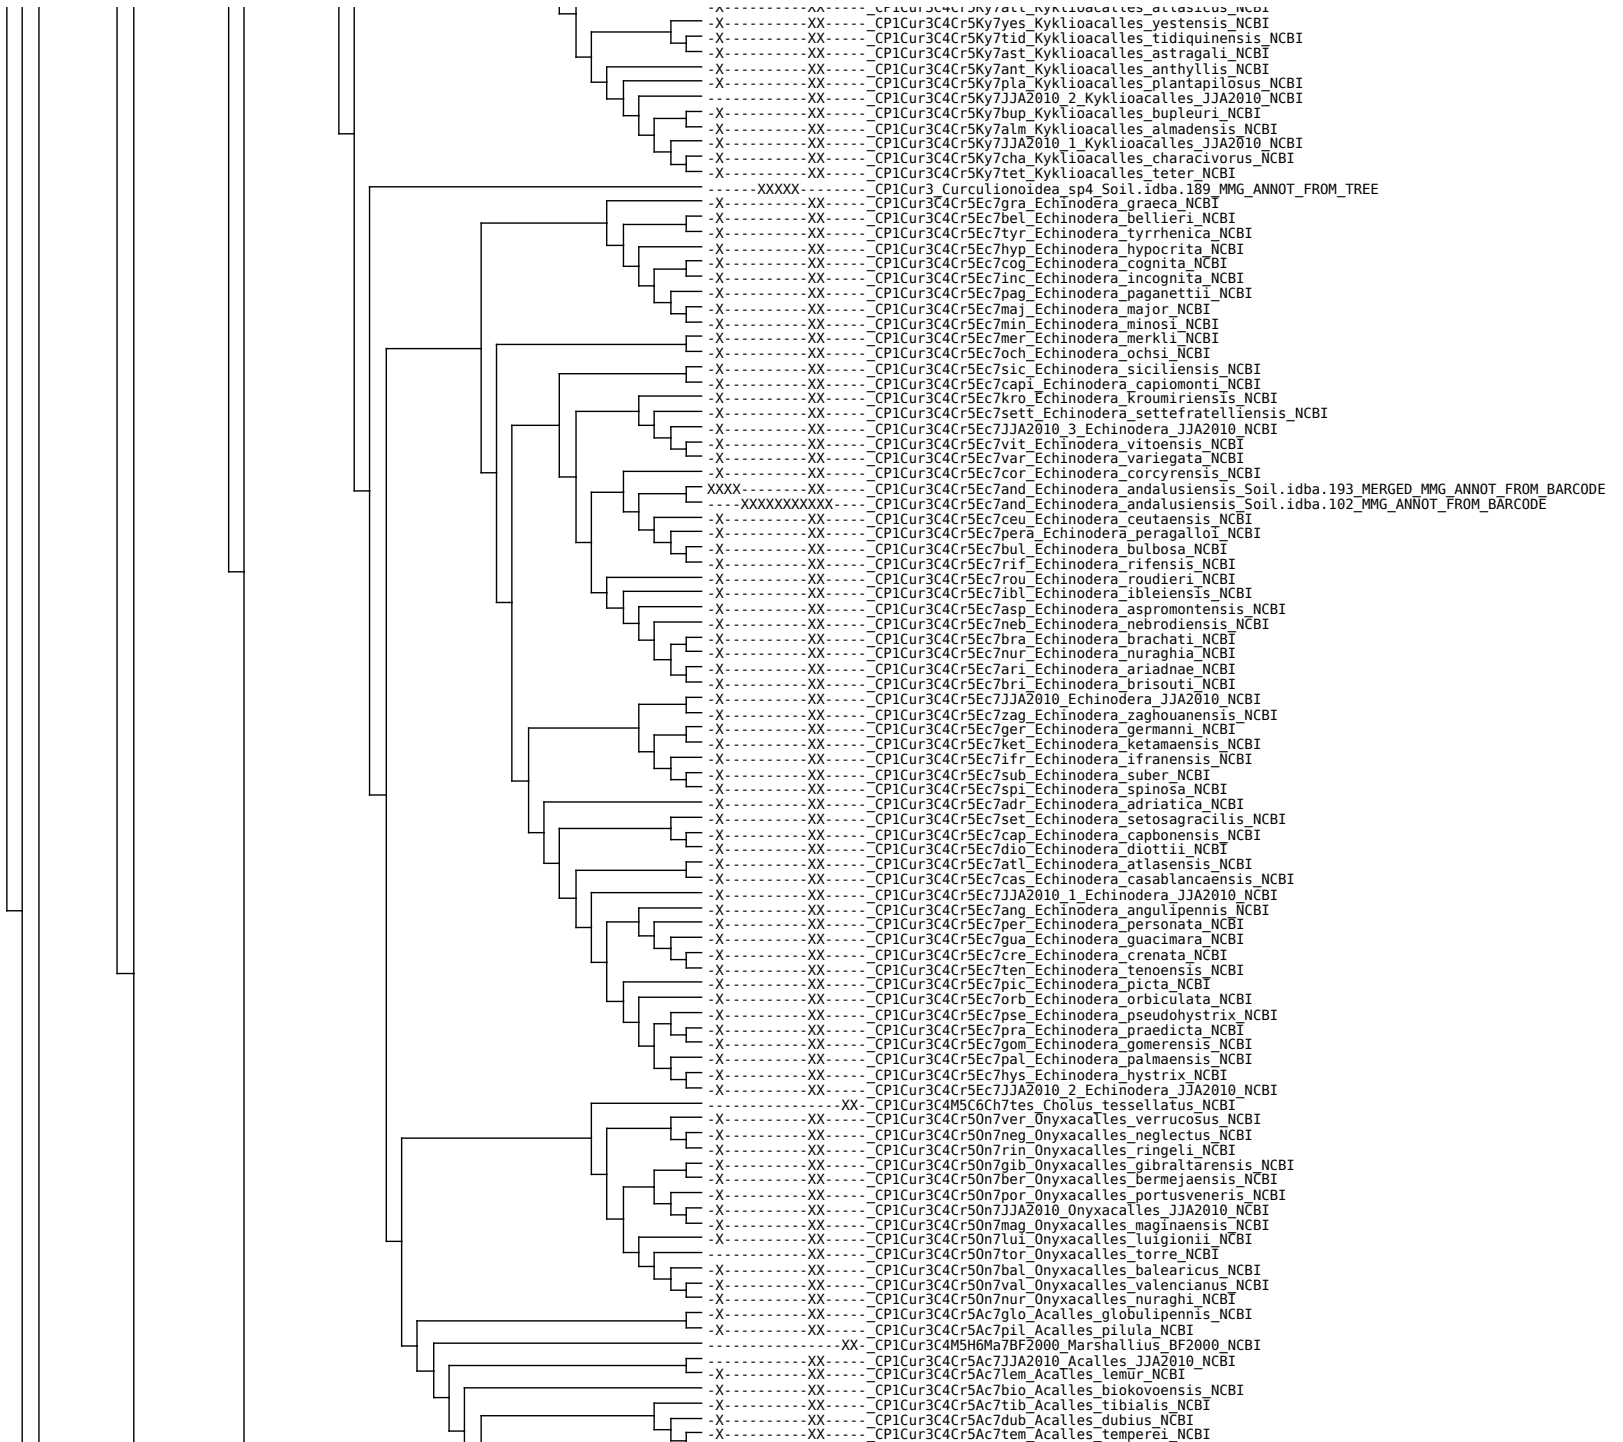



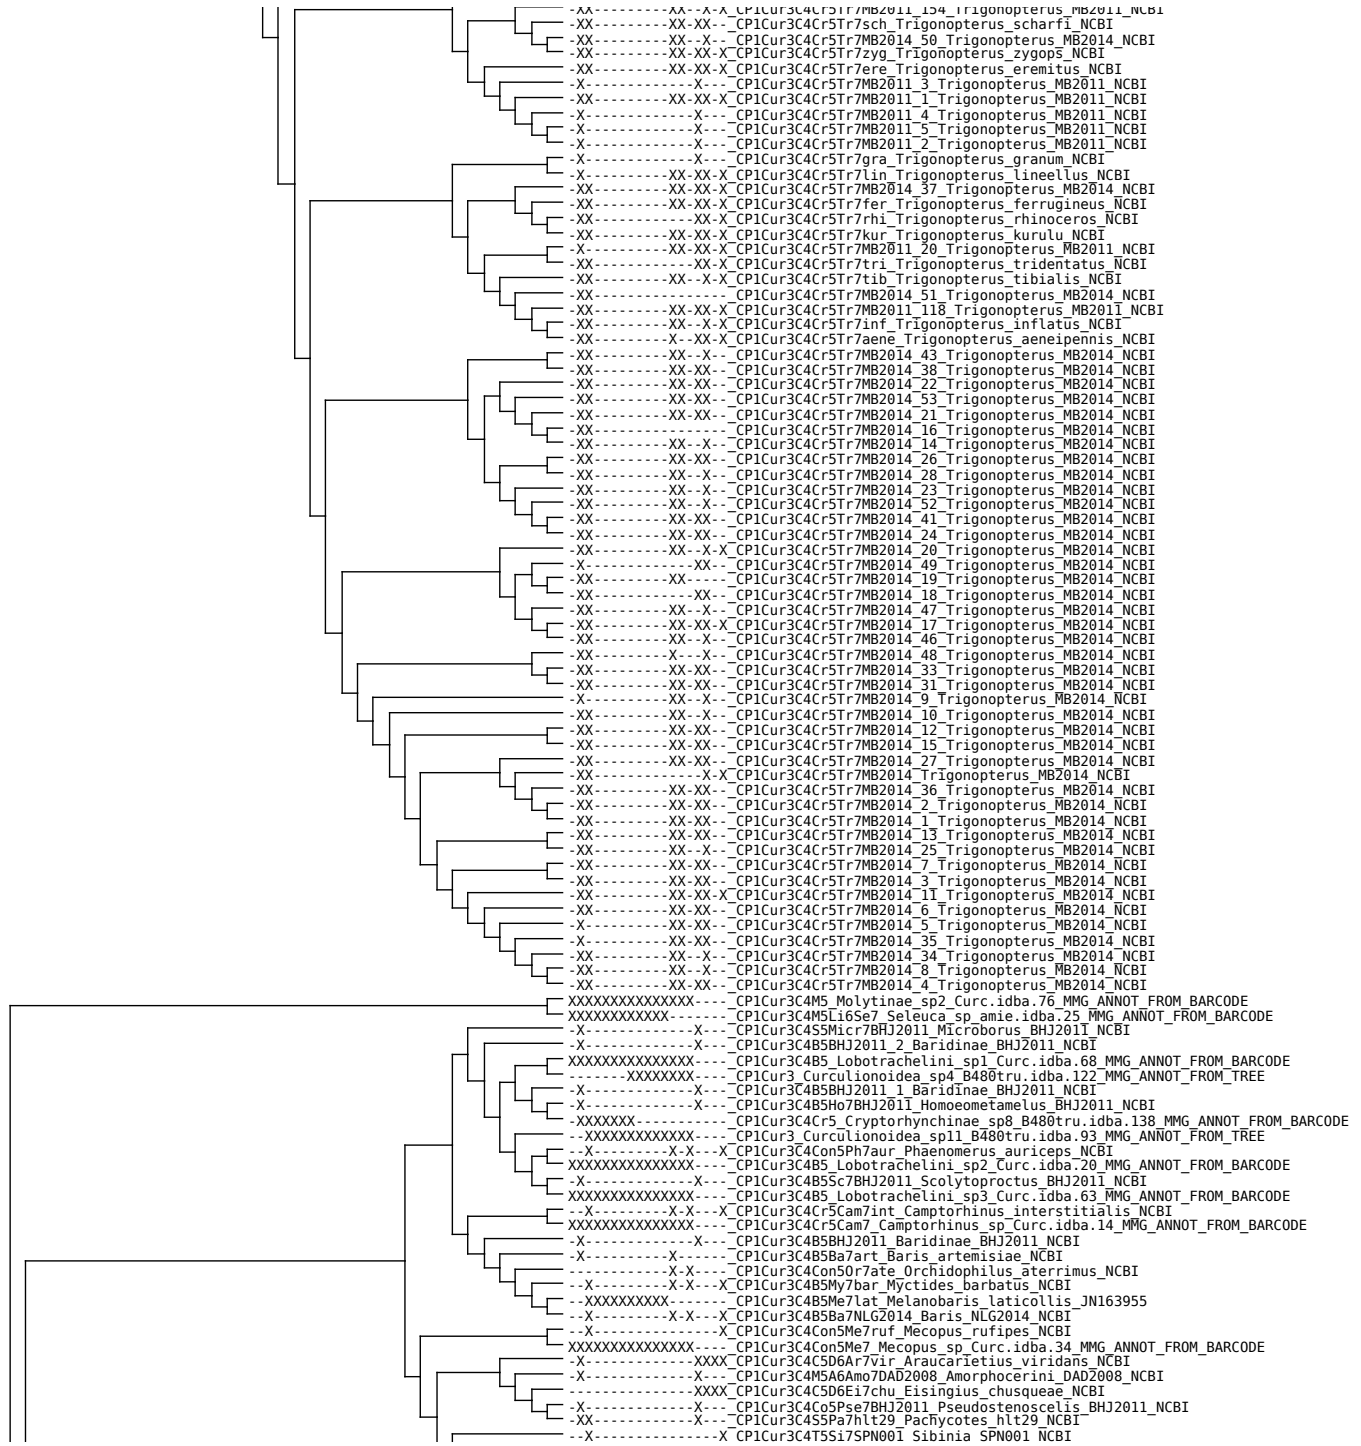

XX-----XX--X-A Cp1Cur3C4Cr5Tr7MB2011\_134 Trigonopterus MB2011 NCBI  
-----XX-XX- Cp1Cur3C4Cr5Tr7sch Trigonopterus scharfi NCBI  
-----XX-XX-X- Cp1Cur3C4Cr5Tr7MB2014\_50 Trigonopterus MB2014 NCBI  
-----XX-XX-X Cp1Cur3C4Cr5Tr7zyg Trigonopterus zygops NCBI  
-----XX-XX-XX-X Cp1Cur3C4Cr5Tr7ere Trigonopterus eremitus NCBI  
-----X-----X- Cp1Cur3C4Cr5Tr7MB2011\_3 Trigonopterus MB2011 NCBI  
-----XX-XX-X-X Cp1Cur3C4Cr5Tr7MB2011\_1 Trigonopterus MB2011 NCBI  
-----X-----X- Cp1Cur3C4Cr5Tr7MB2011\_4 Trigonopterus MB2011 NCBI  
-----X-----X- Cp1Cur3C4Cr5Tr7MB2011\_5 Trigonopterus MB2011 NCBI  
-----X-----X- Cp1Cur3C4Cr5Tr7MB2011\_2 Trigonopterus MB2011 NCBI  
-----X-----X- Cp1Cur3C4Cr5Tr7gra Trigonopterus granum NCBI  
-----X-----XX-XX-X Cp1Cur3C4Cr5Tr7lin Trigonopterus lineellus NCBI  
-----XX-XX-XX-X Cp1Cur3C4Cr5Tr7MB2014\_37 Trigonopterus MB2014 NCBI  
-----XX-XX-X Cp1Cur3C4Cr5Tr7fer Trigonopterus ferrugineus NCBI  
-----XX-XX-XX-X Cp1Cur3C4Cr5Tr7rhi Trigonopterus rhinoceros NCBI  
-----XX-XX-X Cp1Cur3C4Cr5Tr7kur Trigonopterus kurulu NCBI  
-----X-----XX-XX-X Cp1Cur3C4Cr5Tr7MB2011\_20 Trigonopterus MB2011 NCBI  
-----XX-XX-X Cp1Cur3C4Cr5Tr7tri Trigonopterus tridentatus NCBI  
-----XX-XX-X-X Cp1Cur3C4Cr5Tr7tib Trigonopterus tibialis NCBI  
-----XX-----X Cp1Cur3C4Cr5Tr7MB2014\_51 Trigonopterus MB2014 NCBI  
-----XX-XX-X Cp1Cur3C4Cr5Tr7MB2011\_118 Trigonopterus MB2011 NCBI  
-----XX-XX-X-X Cp1Cur3C4Cr5Tr7inf Trigonopterus inflatus NCBI  
-----XX-----X-XX-X Cp1Cur3C4Cr5Tr7aene Trigonopterus aeneipennis NCBI  
-----XX-XX-X- Cp1Cur3C4Cr5Tr7MB2014\_43 Trigonopterus MB2014 NCBI  
-----XX-XX-XX- Cp1Cur3C4Cr5Tr7MB2014\_38 Trigonopterus MB2014 NCBI  
-----XX-XX-XX- Cp1Cur3C4Cr5Tr7MB2014\_22 Trigonopterus MB2014 NCBI  
-----XX-XX-XX- Cp1Cur3C4Cr5Tr7MB2014\_53 Trigonopterus MB2014 NCBI  
-----XX-XX-XX- Cp1Cur3C4Cr5Tr7MB2014\_21 Trigonopterus MB2014 NCBI  
-----XX-----X Cp1Cur3C4Cr5Tr7MB2014\_16 Trigonopterus MB2014 NCBI  
-----XX-XX-X- Cp1Cur3C4Cr5Tr7MB2014\_14 Trigonopterus MB2014 NCBI  
-----XX-XX-XX- Cp1Cur3C4Cr5Tr7MB2014\_26 Trigonopterus MB2014 NCBI  
-----XX-XX-X- Cp1Cur3C4Cr5Tr7MB2014\_28 Trigonopterus MB2014 NCBI  
-----XX-XX-X- Cp1Cur3C4Cr5Tr7MB2014\_23 Trigonopterus MB2014 NCBI  
-----XX-XX-X- Cp1Cur3C4Cr5Tr7MB2014\_52 Trigonopterus MB2014 NCBI  
-----XX-XX-XX- Cp1Cur3C4Cr5Tr7MB2014\_41 Trigonopterus MB2014 NCBI  
-----XX-XX-XX- Cp1Cur3C4Cr5Tr7MB2014\_24 Trigonopterus MB2014 NCBI  
-----XX-X-X-X Cp1Cur3C4Cr5Tr7MB2014\_20 Trigonopterus MB2014 NCBI  
-----X-----XX-XX- Cp1Cur3C4Cr5Tr7MB2014\_49 Trigonopterus MB2014 NCBI  
-----XX-XX-XX- Cp1Cur3C4Cr5Tr7MB2014\_19 Trigonopterus MB2014 NCBI  
-----XX-----XX- Cp1Cur3C4Cr5Tr7MB2014\_18 Trigonopterus MB2014 NCBI  
-----XX-XX-X- Cp1Cur3C4Cr5Tr7MB2014\_47 Trigonopterus MB2014 NCBI  
-----XX-XX-XX-X Cp1Cur3C4Cr5Tr7MB2014\_17 Trigonopterus MB2014 NCBI  
-----XX-XX-X- Cp1Cur3C4Cr5Tr7MB2014\_46 Trigonopterus MB2014 NCBI  
-----XX-----X-X- Cp1Cur3C4Cr5Tr7MB2014\_48 Trigonopterus MB2014 NCBI  
-----XX-XX-XX- Cp1Cur3C4Cr5Tr7MB2014\_33 Trigonopterus MB2014 NCBI  
-----XX-XX-XX- Cp1Cur3C4Cr5Tr7MB2014\_31 Trigonopterus MB2014 NCBI  
-----X-----XX-X- Cp1Cur3C4Cr5Tr7MB2014\_9 Trigonopterus MB2014 NCBI  
-----XX-XX-X- Cp1Cur3C4Cr5Tr7MB2014\_10 Trigonopterus MB2014 NCBI  
-----XX-XX-XX- Cp1Cur3C4Cr5Tr7MB2014\_12 Trigonopterus MB2014 NCBI  
-----XX-XX-XX- Cp1Cur3C4Cr5Tr7MB2014\_15 Trigonopterus MB2014 NCBI  
-----XX-XX-XX- Cp1Cur3C4Cr5Tr7MB2014\_27 Trigonopterus MB2014 NCBI  
-----X-X-X Cp1Cur3C4Cr5Tr7MB2014 Trigonopterus MB2014 NCBI  
-----XX-XX-XX- Cp1Cur3C4Cr5Tr7MB2014\_36 Trigonopterus MB2014 NCBI  
-----XX-XX-XX- Cp1Cur3C4Cr5Tr7MB2014\_2 Trigonopterus MB2014 NCBI  
-----XX-XX-XX- Cp1Cur3C4Cr5Tr7MB2014\_1 Trigonopterus MB2014 NCBI  
-----XX-XX-XX- Cp1Cur3C4Cr5Tr7MB2014\_13 Trigonopterus MB2014 NCBI  
-----XX-XX-X-X Cp1Cur3C4Cr5Tr7MB2014\_25 Trigonopterus MB2014 NCBI  
-----XX-XX-XX- Cp1Cur3C4Cr5Tr7MB2014\_7 Trigonopterus MB2014 NCBI  
-----XX-XX-XX- Cp1Cur3C4Cr5Tr7MB2014\_3 Trigonopterus MB2014 NCBI  
-----XX-XX-XX-X Cp1Cur3C4Cr5Tr7MB2014\_11 Trigonopterus MB2014 NCBI  
-----XX-XX-XX- Cp1Cur3C4Cr5Tr7MB2014\_6 Trigonopterus MB2014 NCBI  
-----X-----XX-XX- Cp1Cur3C4Cr5Tr7MB2014\_5 Trigonopterus MB2014 NCBI  
-----X-----XX-XX- Cp1Cur3C4Cr5Tr7MB2014\_35 Trigonopterus MB2014 NCBI  
-----XX-XX-X- Cp1Cur3C4Cr5Tr7MB2014\_34 Trigonopterus MB2014 NCBI  
-----XX-XX-X- Cp1Cur3C4Cr5Tr7MB2014\_8 Trigonopterus MB2014 NCBI  
-----XX-XX-XX-XX- Cp1Cur3C4Cr5Tr7MB2014\_4 Trigonopterus MB2014 NCBI  
XXXXXXXXXXXXXXXX Cp1Cur3C4M5 Molytinae\_sp2\_Curc.idba.76 MMG\_ANNOT\_FROM\_BARCODE  
XXXXXXXXXXXXXXXX Cp1Cur3C4M5L16Se7 Seleuca\_sp\_amei.idba.25 MMG\_ANNOT\_FROM\_BARCODE  
-----X-----X- Cp1Cur3C4S5Micr7BHJ2011 Microborus BHJ2011 NCBI  
-----X-----X- Cp1Cur3C4B5BHJ2011\_2 Baridinae BHJ2011 NCBI  
XXXXXXXXXXXXXXXX Cp1Cur3C4B5 Lobotrachelini\_sp1\_Curc.idba.68 MMG\_ANNOT\_FROM\_BARCODE  
-----XXXXXXXXX Cp1Cur3 Curculionidea\_sp4\_B480tru.idba.122 MMG\_ANNOT\_FROM\_TREE  
-----X-----X- Cp1Cur3C4B5BHJ2011\_1 Baridinae BHJ2011 NCBI  
-----X-----X- Cp1Cur3C4B5H7BHJ2011 Homoeometelus BHJ2011 NCBI  
-----XXXXXXXXX Cp1Cur3C4Cr5 Cryptorhynchinae\_sp8\_B480tru.idba.138 MMG\_ANNOT\_FROM\_BARCODE  
XXXXXXXXXXXXXXXX Cp1Cur3 Curculionidea\_sp11\_B480tru.idba.93 MMG\_ANNOT\_FROM\_TREE  
-----X-----X-X-X Cp1Cur3C4ConSP7aur Phaenomerus auriceps NCBI  
XXXXXXXXXXXXXXXX Cp1Cur3C4B5 Lobotrachelini\_sp2\_Curc.idba.20 MMG\_ANNOT\_FROM\_BARCODE  
-----X-----X- Cp1Cur3C4B5Sc7BHJ2011 Scolytoproctus BHJ2011 NCBI  
XXXXXXXXXXXXXXXX Cp1Cur3C4B5 Lobotrachelini\_sp3\_Curc.idba.63 MMG\_ANNOT\_FROM\_BARCODE  
-----X-----X-X-X Cp1Cur3C4Cr5Cam7int Camptorhinus interstitialis NCBI  
XXXXXXXXXXXXXXXX Cp1Cur3C4Cr5Cam7 Camptorhinus\_sp\_Curc.idba.14 MMG\_ANNOT\_FROM\_BARCODE  
-----X-----X- Cp1Cur3C4B5BHJ2011 Baridinae BHJ2011 NCBI  
-----X-----X- Cp1Cur3C4B5Ba7art Baris artemisiae NCBI  
-----X-----X-X- Cp1Cur3C4Con50r7ate Orchidophilus aterrimus NCBI  
-----X-----X-X-X Cp1Cur3C4B5My7bar Myctides barbatus NCBI  
XXXXXXXXXXXX Cp1Cur3C4B5Me7lat Melanobaris laticollis\_JN163955  
-----X-----X-X-X Cp1Cur3C4B5Ba7NLG2014 Baris\_NLG2014 NCBI  
-----X-----X- Cp1Cur3C4Con5Me7ruf Mecopus\_rufipes NCBI  
XXXXXXXXXXXXXXXX Cp1Cur3C4Con5Me7 Mecopus\_sp\_Curc.idba.34 MMG\_ANNOT\_FROM\_BARCODE  
-----X-----XXXX Cp1Cur3C4C5D6Ar7vir Araucarietius\_viridans NCBI  
-----X-----X- Cp1Cur3C4M5A6Amo7DAD2008 Amorphocerini\_DAD2008 NCBI  
-----XXXX Cp1Cur3C4C5D6E17chu Eisingius\_chusqueae NCBI  
-----X-----X- Cp1Cur3C4C5Pse7BHJ2011 Pseudostenocelis\_BHJ2011 NCBI  
-----X-----X- Cp1Cur3C4S5P7h129 Pacifycotes\_h129 NCBI  
-----X-----X- Cp1Cur3C4T5S17SPN001 Sibirina SPN001 NCBI

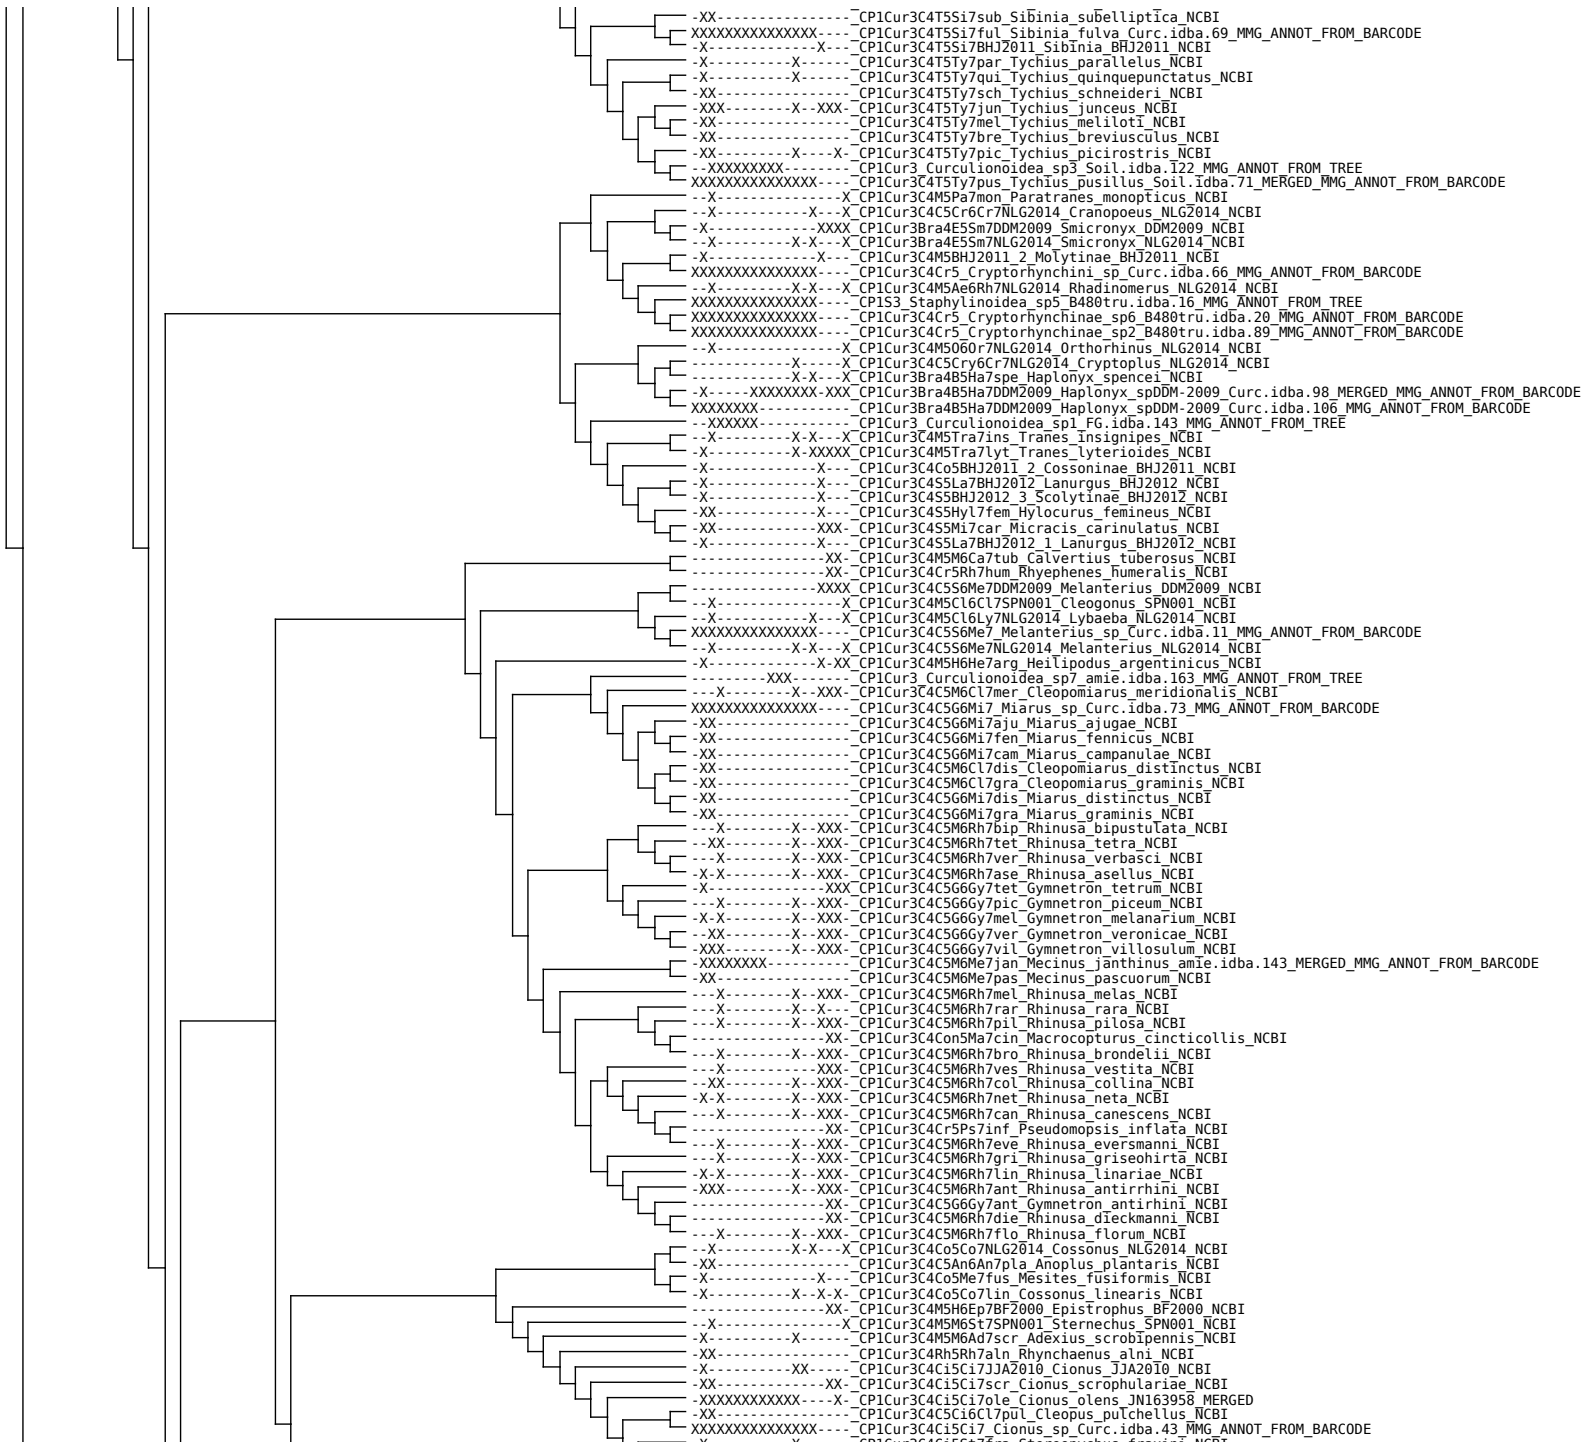

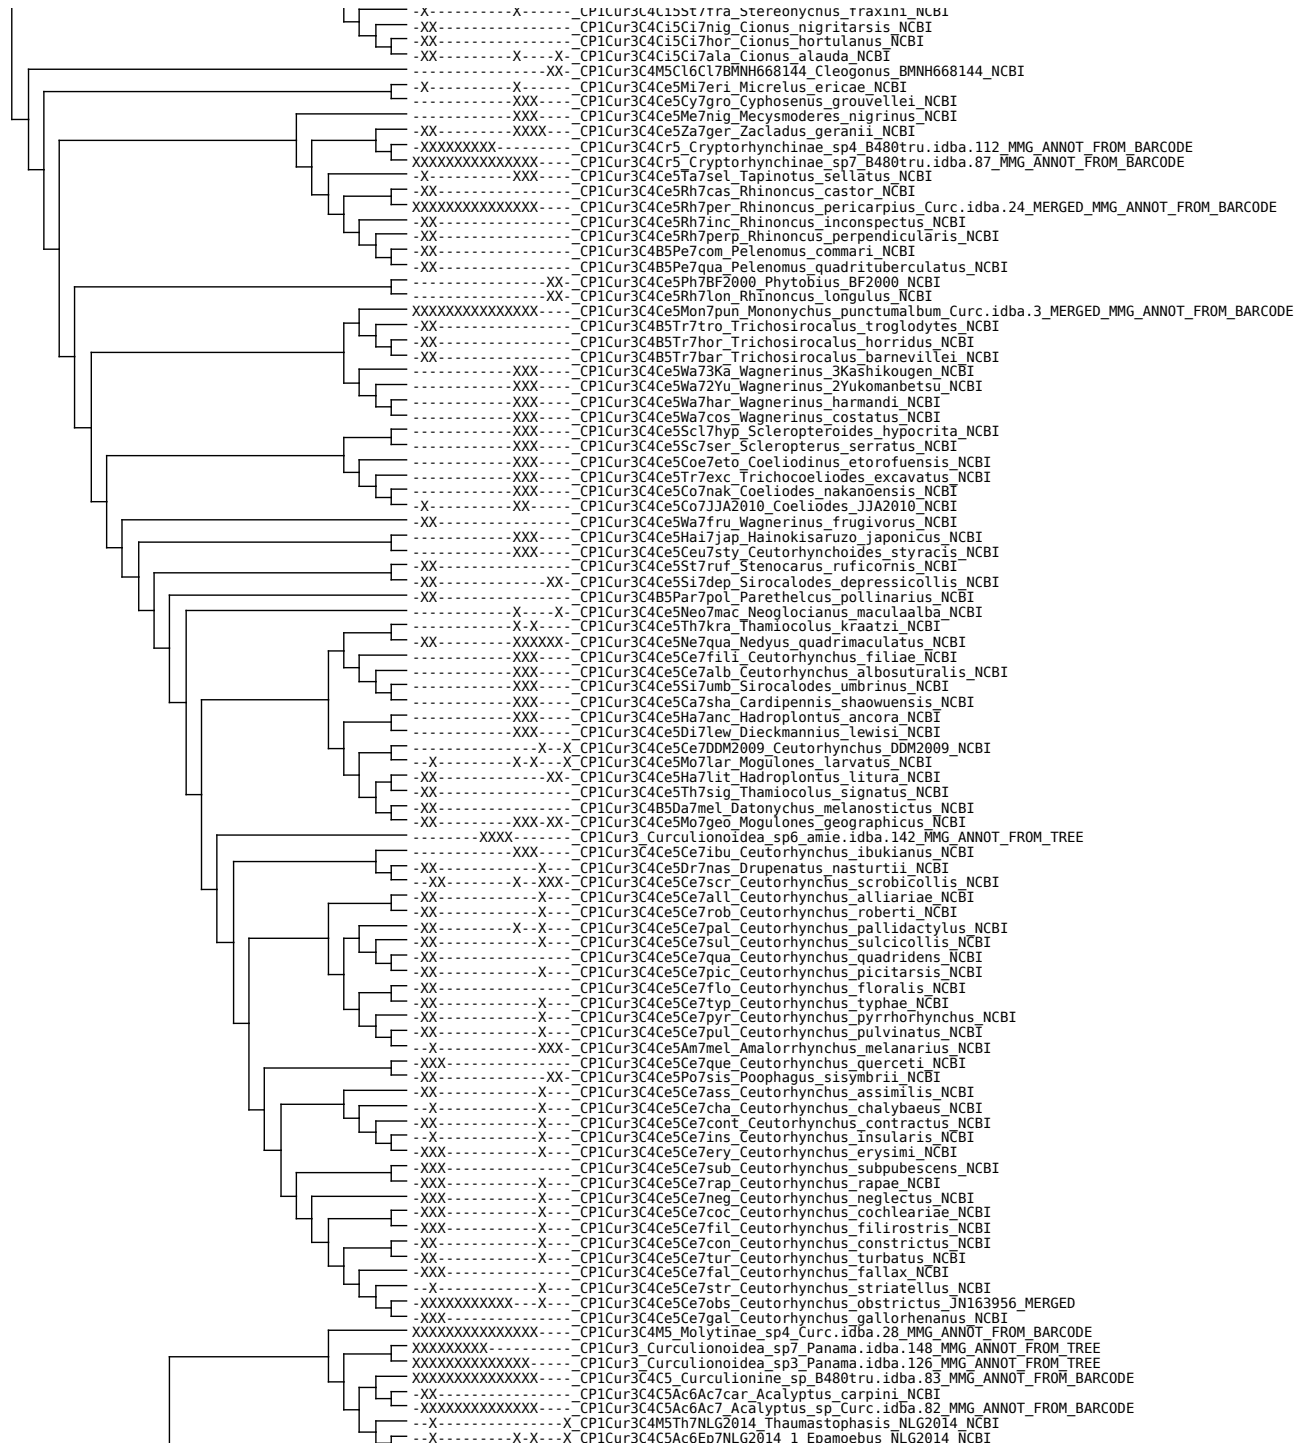



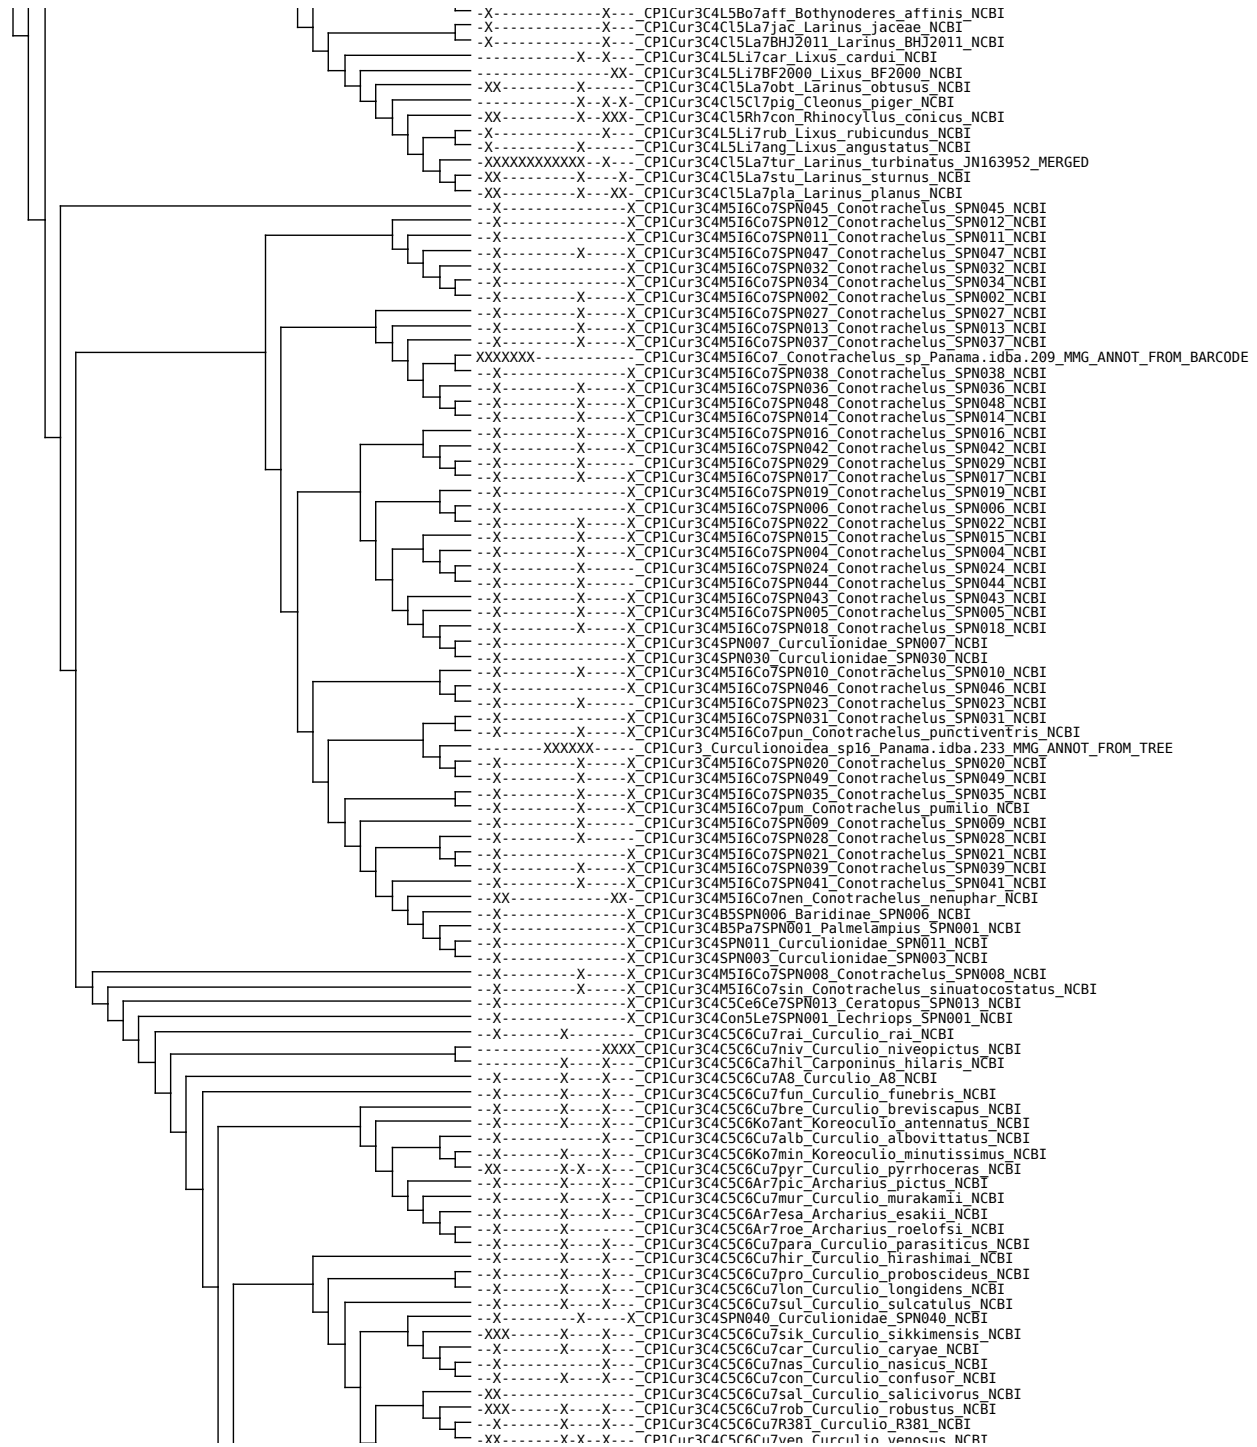



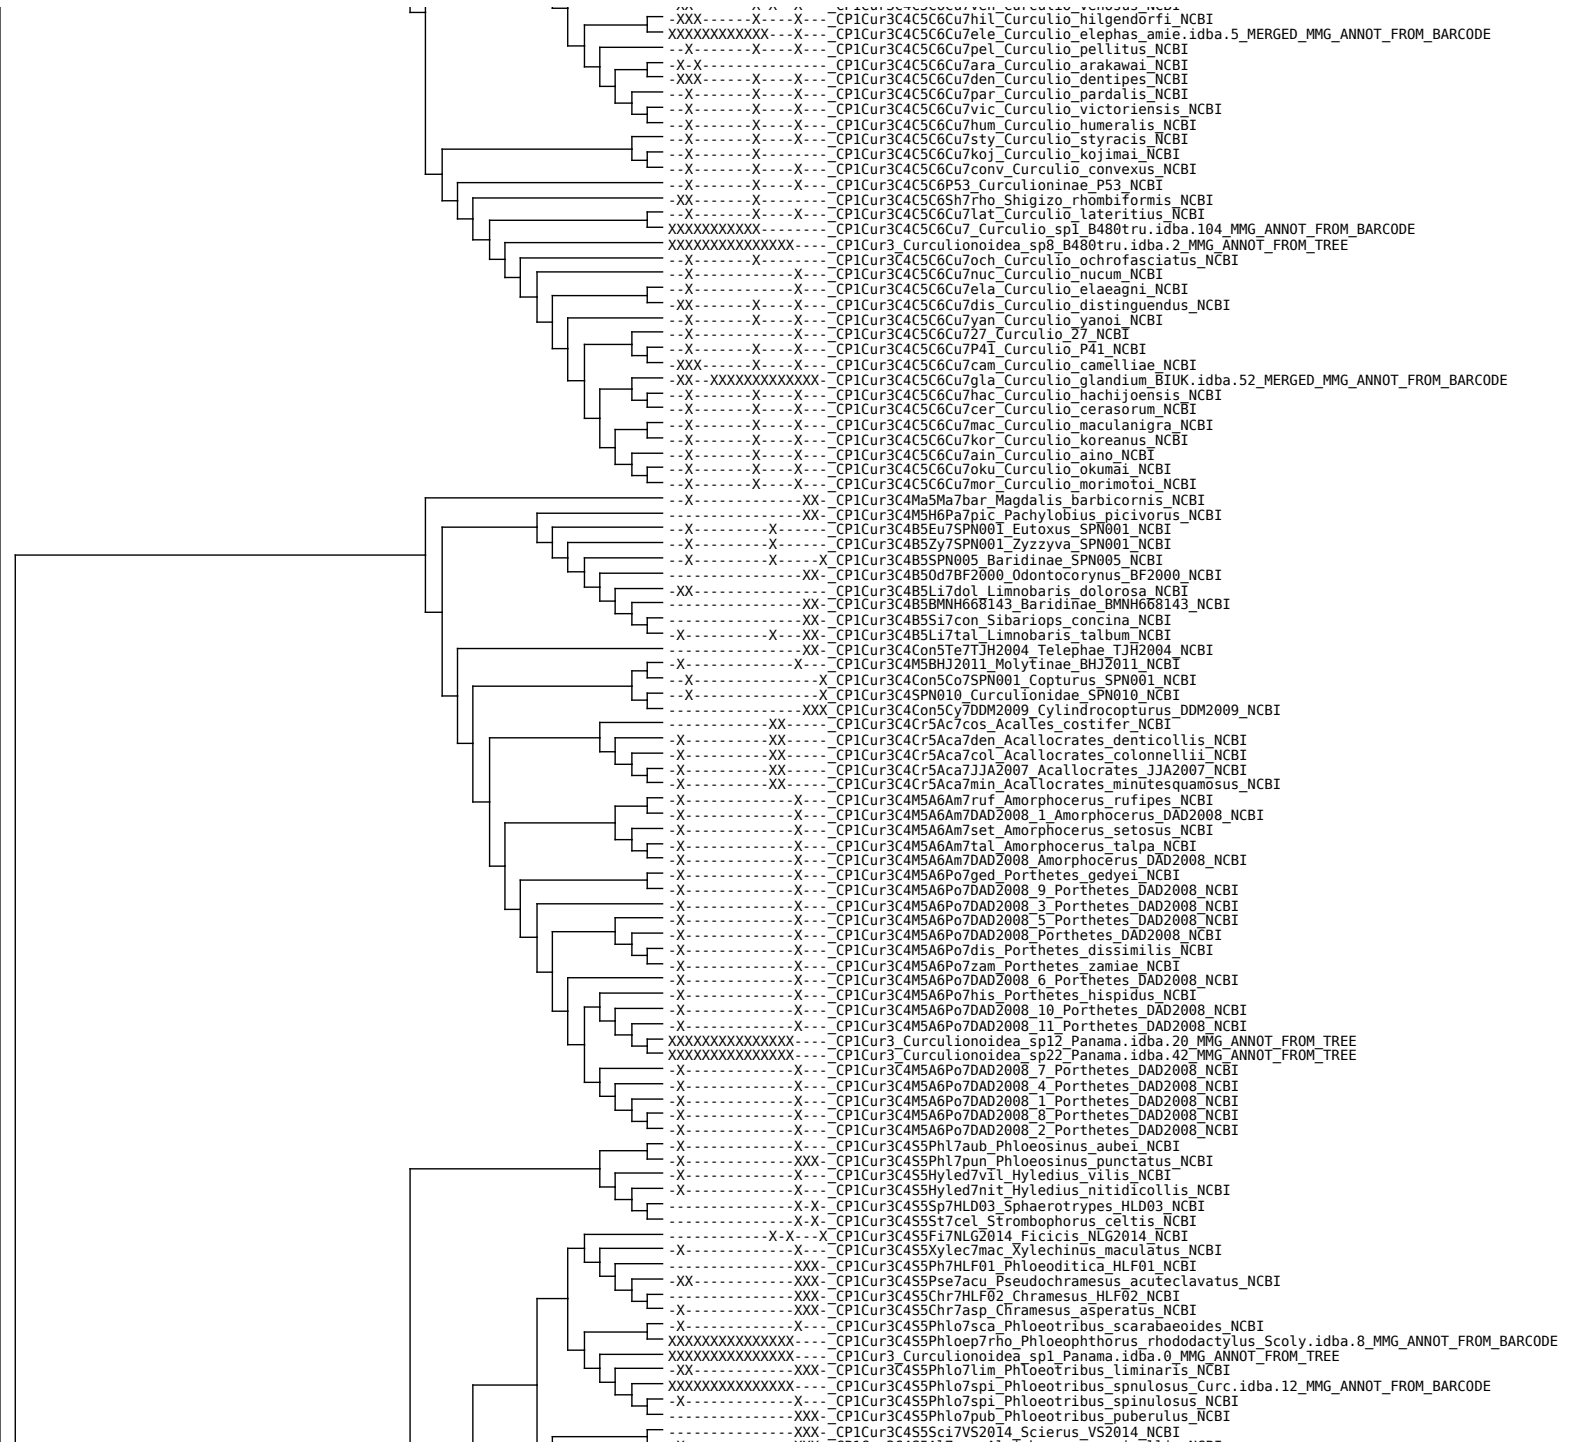

XXX-CP1Cur3C4C5C6C7hil\_Curculio\_hilgendorfi NCBI  
XXXXXXXXXXXX-CP1Cur3C4C5C6C7ele\_Curculio\_elephas\_ame.idba.5\_MERGED\_MMG\_ANNOT\_FROM\_BARCODE  
-X-CP1Cur3C4C5C6C7pel\_Curculio\_pellitus NCBI  
-X-X-CP1Cur3C4C5C6C7ara\_Curculio\_arakawai NCBI  
-XXX-CP1Cur3C4C5C6C7den\_Curculio\_dentipes NCBI  
-X-CP1Cur3C4C5C6C7par\_Curculio\_pardalis NCBI  
-X-CP1Cur3C4C5C6C7vic\_Curculio\_victoriensis NCBI  
-X-CP1Cur3C4C5C6C7hum\_Curculio\_humeralis NCBI  
-X-CP1Cur3C4C5C6C7sty\_Curculio\_styracis NCBI  
-X-CP1Cur3C4C5C6C7koj\_Curculio\_kojimai NCBI  
-X-CP1Cur3C4C5C6C7conv\_Curculio\_convexus NCBI  
-X-CP1Cur3C4C5C6C7Curculioninae\_P53 NCBI  
-XX-CP1Cur3C4C5C6C7rho\_Shigizo\_rho NCBI  
-X-CP1Cur3C4C5C6C7lat\_Curculio\_laterius NCBI  
XXXXXXXXXXXX-CP1Cur3C4C5C6C7sp1\_B480tru.idba.104\_MMG\_ANNOT\_FROM\_BARCODE  
XXXXXXXXXXXX-CP1Cur3C4C5C6C7sp8\_B480tru.idba.2\_MMG\_ANNOT\_FROM\_TREE  
-X-CP1Cur3C4C5C6C7och\_Curculio\_ochrofasciatus NCBI  
-X-CP1Cur3C4C5C6C7nuc\_Curculio\_nucum NCBI  
-X-CP1Cur3C4C5C6C7ela\_Curculio\_elaeagni NCBI  
-XX-CP1Cur3C4C5C6C7dis\_Curculio\_distinguendus NCBI  
-X-CP1Cur3C4C5C6C7yan\_Curculio\_yanoi NCBI  
-X-CP1Cur3C4C5C6C727\_Curculio\_27 NCBI  
-X-CP1Cur3C4C5C6C7P41\_Curculio\_P41 NCBI  
-XXX-CP1Cur3C4C5C6C7cam\_Curculio\_camelliae NCBI  
-XX-CP1Cur3C4C5C6C7gla\_Curculio\_glandium\_BIUK.idba.52\_MERGED\_MMG\_ANNOT\_FROM\_BARCODE  
-X-CP1Cur3C4C5C6C7hac\_Curculio\_hachijoensis NCBI  
-X-CP1Cur3C4C5C6C7cer\_Curculio\_cerasorum NCBI  
-X-CP1Cur3C4C5C6C7mac\_Curculio\_maculanigra NCBI  
-X-CP1Cur3C4C5C6C7kor\_Curculio\_koreanus NCBI  
-X-CP1Cur3C4C5C6C7ain\_Curculio\_aino NCBI  
-X-CP1Cur3C4C5C6C7okui\_Curculio\_okuii NCBI  
-X-CP1Cur3C4C5C6C7mor\_Curculio\_morimotoi NCBI  
-XX-CP1Cur3C4Ma5Ma7bar\_Magdalis\_barbicornis NCBI  
-XX-CP1Cur3C4M5H6A7pic\_Pachylobius\_picivorus NCBI  
-X-CP1Cur3C4B5E7SPN001\_Eutoxus\_SPN001 NCBI  
-X-CP1Cur3C4B5Zy7SPN001\_Zyzzyva\_SPN001 NCBI  
-X-CP1Cur3C4B5SPN005\_Baridinae\_SPN005 NCBI  
-XX-CP1Cur3C4B50d7BF2000\_Odontocorynus\_BF2000 NCBI  
-XX-CP1Cur3C4B5Li7dol\_Limnobaris\_dolorosa NCBI  
-XX-CP1Cur3C4B5BMNH668143\_Baridinae\_BMNH668143 NCBI  
-XX-CP1Cur3C4B5S17con\_Sibariops\_concina NCBI  
-X-CP1Cur3C4B5Li7tal\_Limnobaris\_taljum NCBI  
-XX-CP1Cur3C4Con5Te7TJH2004\_Telephae\_TJH2004 NCBI  
-X-CP1Cur3C4M5BHJ2011\_Molytinae\_BHJ2011 NCBI  
-X-CP1Cur3C4Con5C07SPN001\_Copturus\_SPN001 NCBI  
-X-CP1Cur3C4SPN010\_Curculionidae\_SPN010 NCBI  
-XXX-CP1Cur3C4Con5Cy7DDM2009\_Cylindrocopturus\_DDM2009 NCBI  
-XX-CP1Cur3C4Cr5Ac7cos\_Acalles\_costifer NCBI  
-X-CP1Cur3C4Cr5Aca7den\_Acallocrates\_denticollis NCBI  
-XX-CP1Cur3C4Cr5Aca7col\_Acallocrates\_colonnetlii NCBI  
-X-CP1Cur3C4Cr5Aca7JJA2007\_Acallocrates\_JJA2007 NCBI  
-X-CP1Cur3C4Cr5Aca7min\_Acallocrates\_minutesquamosus NCBI  
-X-CP1Cur3C4M5A6Am7ruf\_Amorphocerus\_rufipes NCBI  
-X-CP1Cur3C4M5A6Am7DAD2008\_1\_Amorphocerus\_DAD2008 NCBI  
-X-CP1Cur3C4M5A6Am7set\_Amorphocerus\_setosus NCBI  
-X-CP1Cur3C4M5A6Am7tal\_Amorphocerus\_talpa NCBI  
-X-CP1Cur3C4M5A6Am7DAD2008\_Amorphocerus\_DAD2008 NCBI  
-X-CP1Cur3C4M5A6Po7ged\_Porthetes\_gedyei NCBI  
-X-CP1Cur3C4M5A6Po7DAD2008\_9\_Porthetes\_DAD2008 NCBI  
-X-CP1Cur3C4M5A6Po7DAD2008\_3\_Porthetes\_DAD2008 NCBI  
-X-CP1Cur3C4M5A6Po7DAD2008\_5\_Porthetes\_DAD2008 NCBI  
-X-CP1Cur3C4M5A6Po7DAD2008\_Porthetes\_DAD2008 NCBI  
-X-CP1Cur3C4M5A6Po7dis\_Porthetes\_dissimilis NCBI  
-X-CP1Cur3C4M5A6Po7zam\_Porthetes\_zamiae NCBI  
-X-CP1Cur3C4M5A6Po7DAD2008\_6\_Porthetes\_DAD2008 NCBI  
-X-CP1Cur3C4M5A6Po7his\_Porthetes\_hispidus NCBI  
-X-CP1Cur3C4M5A6Po7DAD2008\_10\_Porthetes\_DAD2008 NCBI  
-X-CP1Cur3C4M5A6Po7DAD2008\_11\_Porthetes\_DAD2008 NCBI  
XXXXXXXXXXXX-CP1Cur3C4M5A6Po7DAD2008\_12\_Panama.idba.20\_MMG\_ANNOT\_FROM\_TREE  
XXXXXXXXXXXX-CP1Cur3C4M5A6Po7DAD2008\_7\_Porthetes\_DAD2008 NCBI  
-X-CP1Cur3C4M5A6Po7DAD2008\_4\_Porthetes\_DAD2008 NCBI  
-X-CP1Cur3C4M5A6Po7DAD2008\_1\_Porthetes\_DAD2008 NCBI  
-X-CP1Cur3C4M5A6Po7DAD2008\_8\_Porthetes\_DAD2008 NCBI  
-X-CP1Cur3C4M5A6Po7DAD2008\_2\_Porthetes\_DAD2008 NCBI  
-X-CP1Cur3C4S5Ph17aub\_Phloeosinus\_aubei NCBI  
-XXX-CP1Cur3C4S5Ph17pun\_Phloeosinus\_punctatus NCBI  
-X-CP1Cur3C4S5Hyled7vil\_Hyledius\_vilis NCBI  
-X-CP1Cur3C4S5Hyled7nit\_Hyledius\_nitidicollis NCBI  
-X-X-CP1Cur3C4S5S07HLD03\_Sphaerotrypes\_HLD03 NCBI  
-X-X-CP1Cur3C4S5S7cel\_Strombophorus\_celtis NCBI  
-X-X-CP1Cur3C4S5F17NLG2014\_Ficicis\_NLG2014 NCBI  
-X-CP1Cur3C4S5Xylec7mac\_Xylechinus\_maculatus NCBI  
-XXX-CP1Cur3C4S5Ph7HLF01\_Phloeoditica\_HLF01 NCBI  
-XX-CP1Cur3C4S5Pse7acu\_Pseudochramesus\_acuteclavatus NCBI  
-XXX-CP1Cur3C4S5Chr7HLF02\_Chramesus\_HLF02 NCBI  
-X-CP1Cur3C4S5Chr7asp\_Chramesus\_asperatus NCBI  
-X-CP1Cur3C4S5Phlo7sca\_Phloeotribus\_scarabaeoides NCBI  
XXXXXXXXXXXX-CP1Cur3C4S5Phloep7rho\_Phloeophthorus\_rhododactylus\_Scoly.idba.8\_MMG\_ANNOT\_FROM\_BARCODE  
XXXXXXXXXXXX-CP1Cur3C4S5Phlo7sp1\_Panama.idba.0\_MMG\_ANNOT\_FROM\_TREE  
-XX-CP1Cur3C4S5Phlo7lim\_Phloeotribus\_limnaris NCBI  
XXXXXXXXXXXX-CP1Cur3C4S5Phlo7spi\_Phloeotribus\_spinulosus\_Curc.idba.12\_MMG\_ANNOT\_FROM\_BARCODE  
-X-CP1Cur3C4S5Phlo7spi\_Phloeotribus\_spinulosus NCBI  
-XXX-CP1Cur3C4S5Phlo7pub\_Phloeotribus\_puberulus NCBI  
-XXX-CP1Cur3C4S5Sci7V52014\_Scierus\_V52014 NCBI

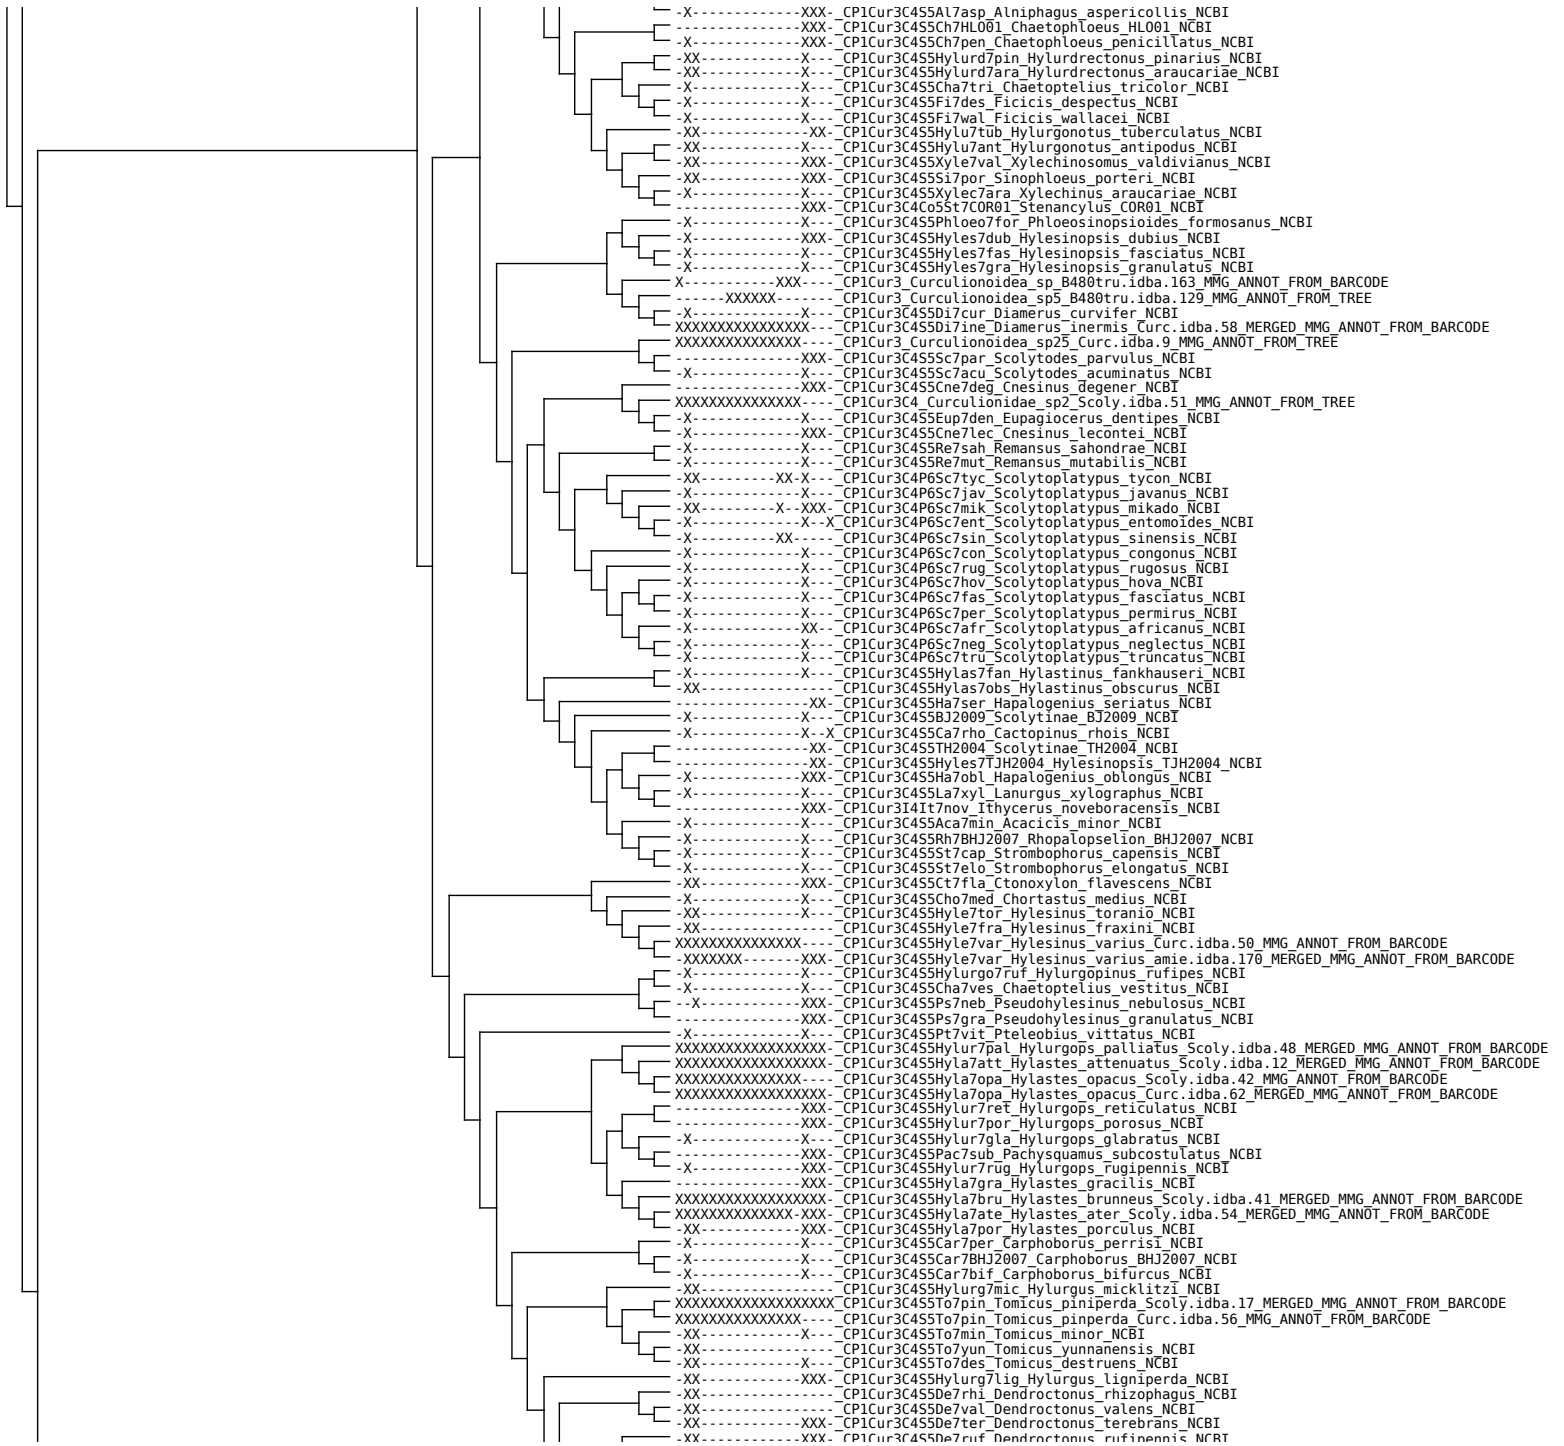

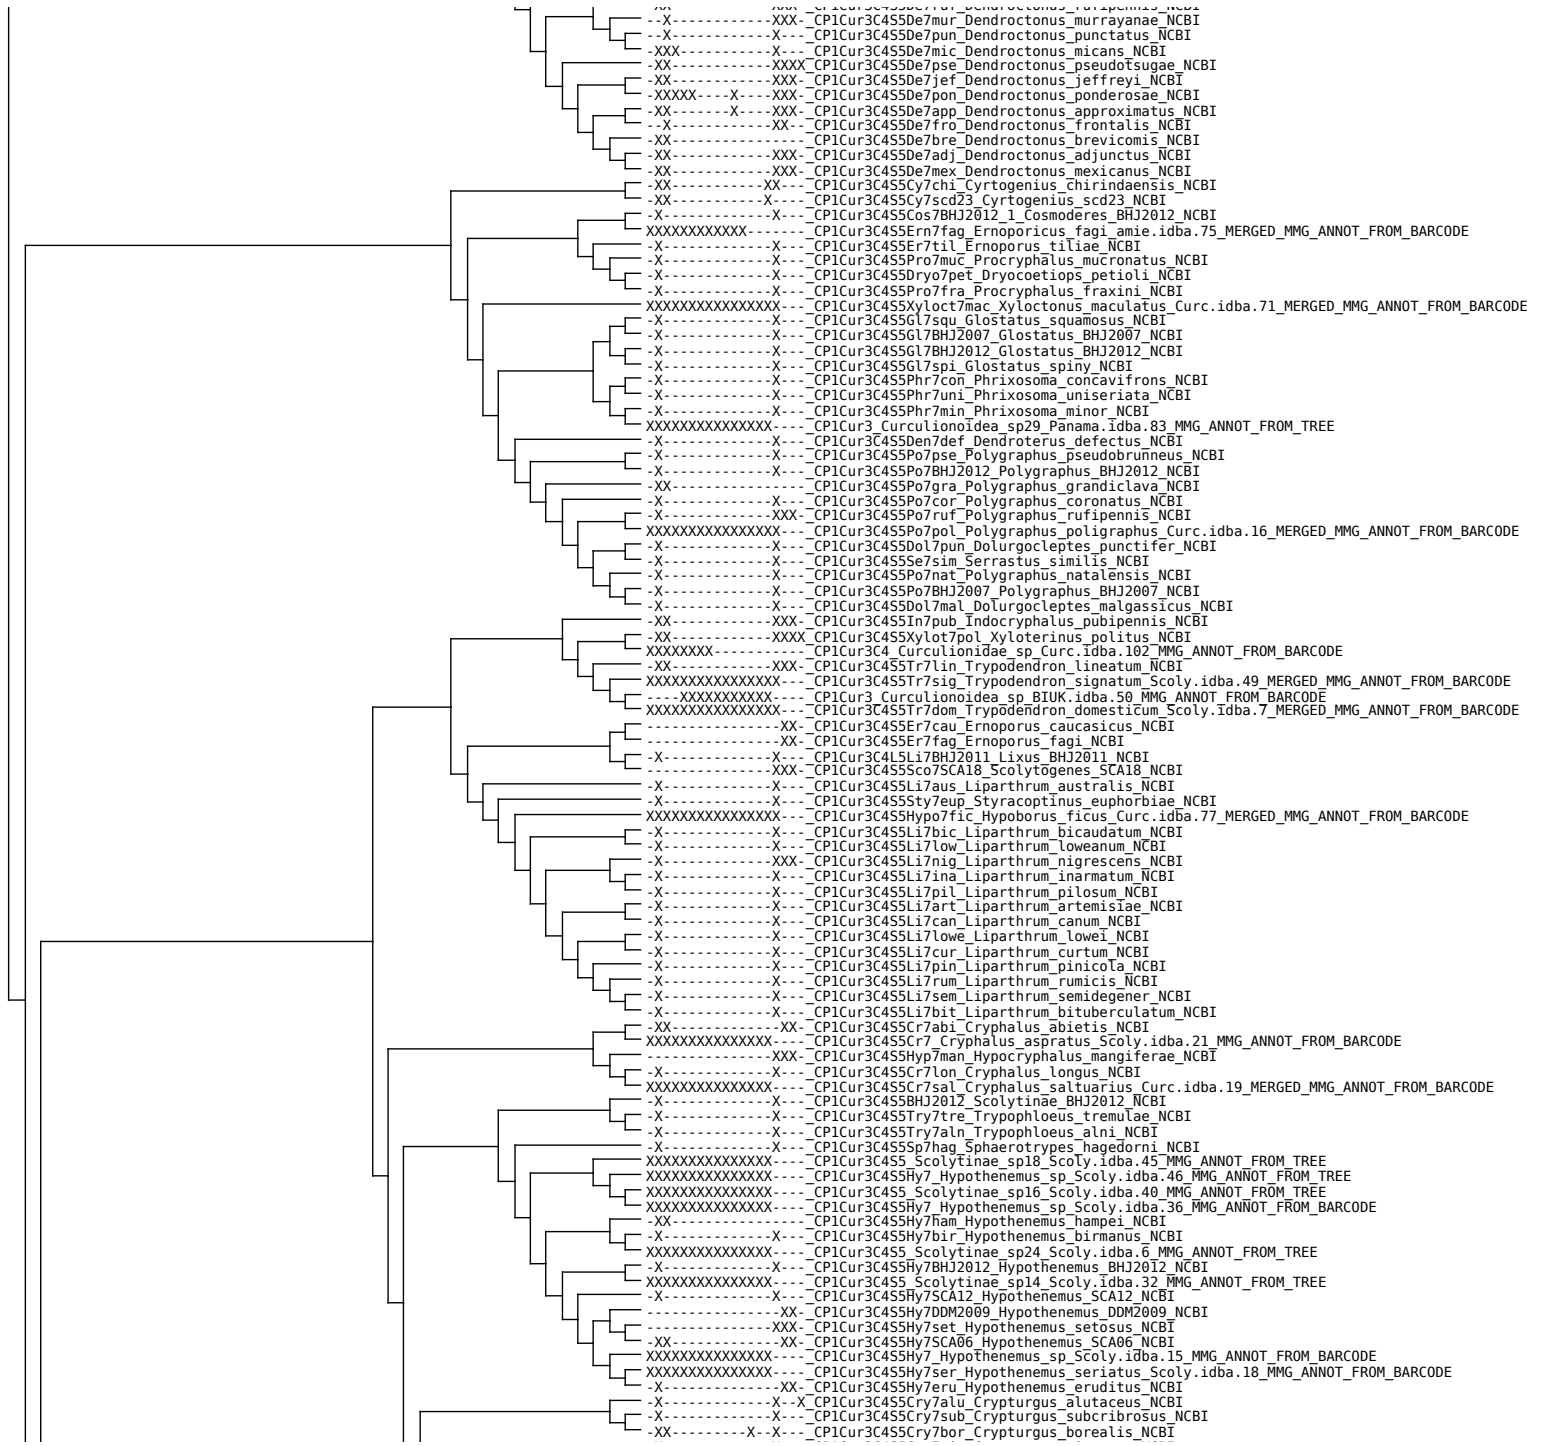

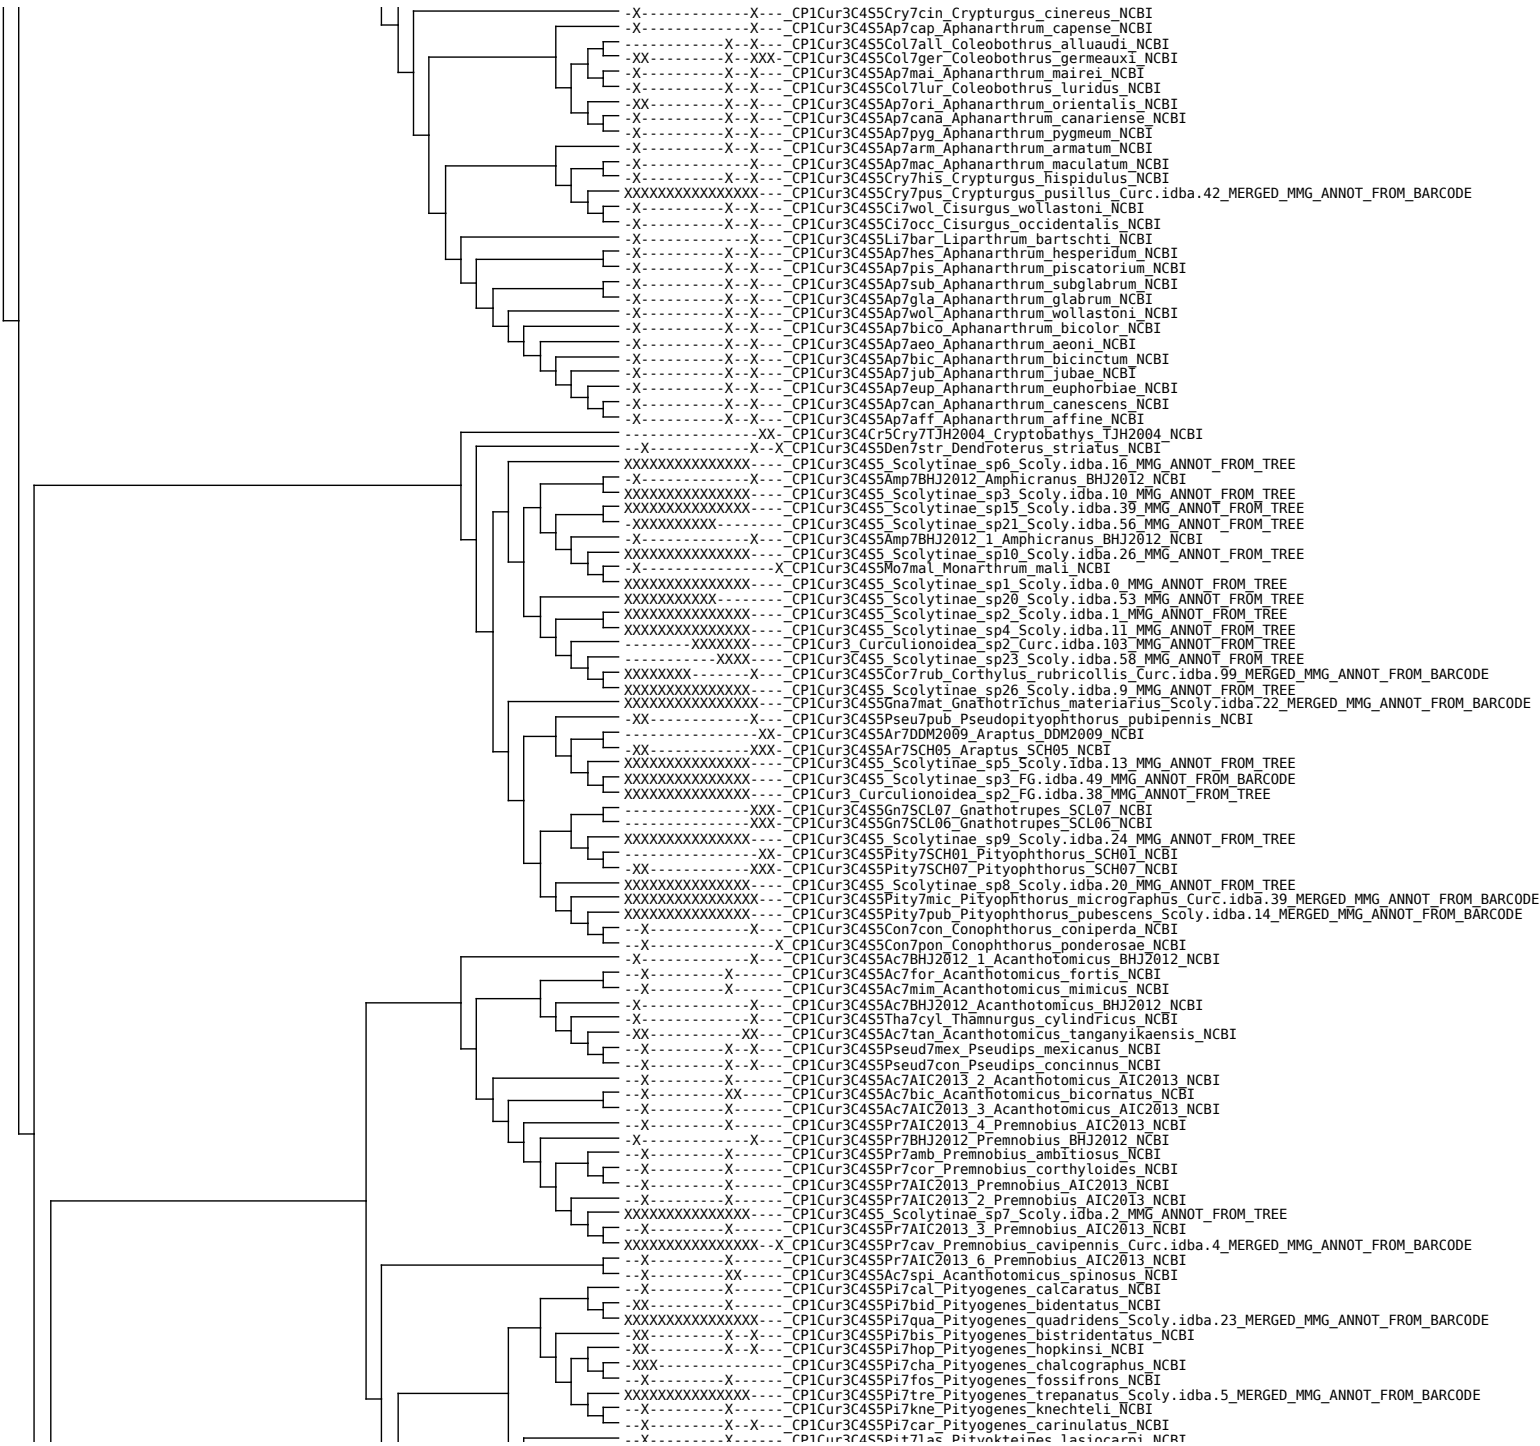

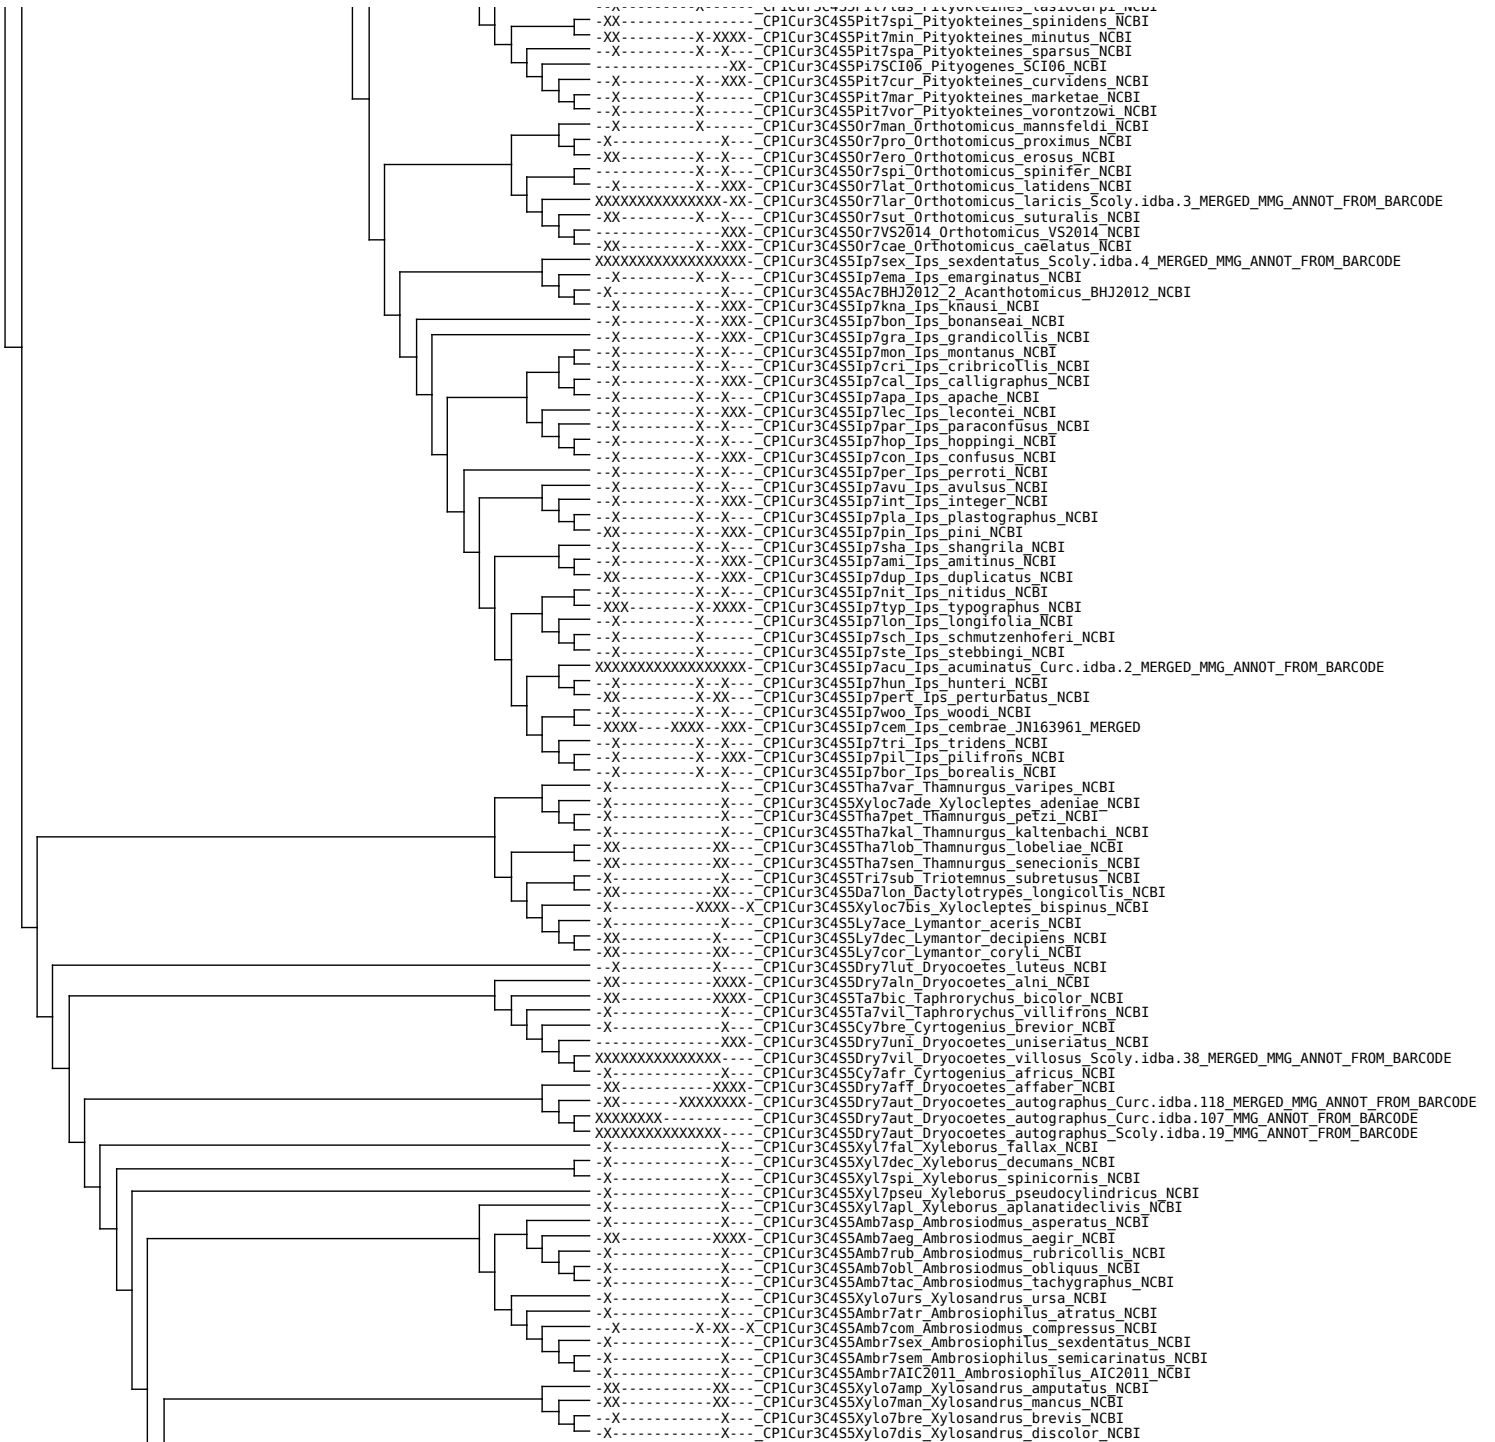

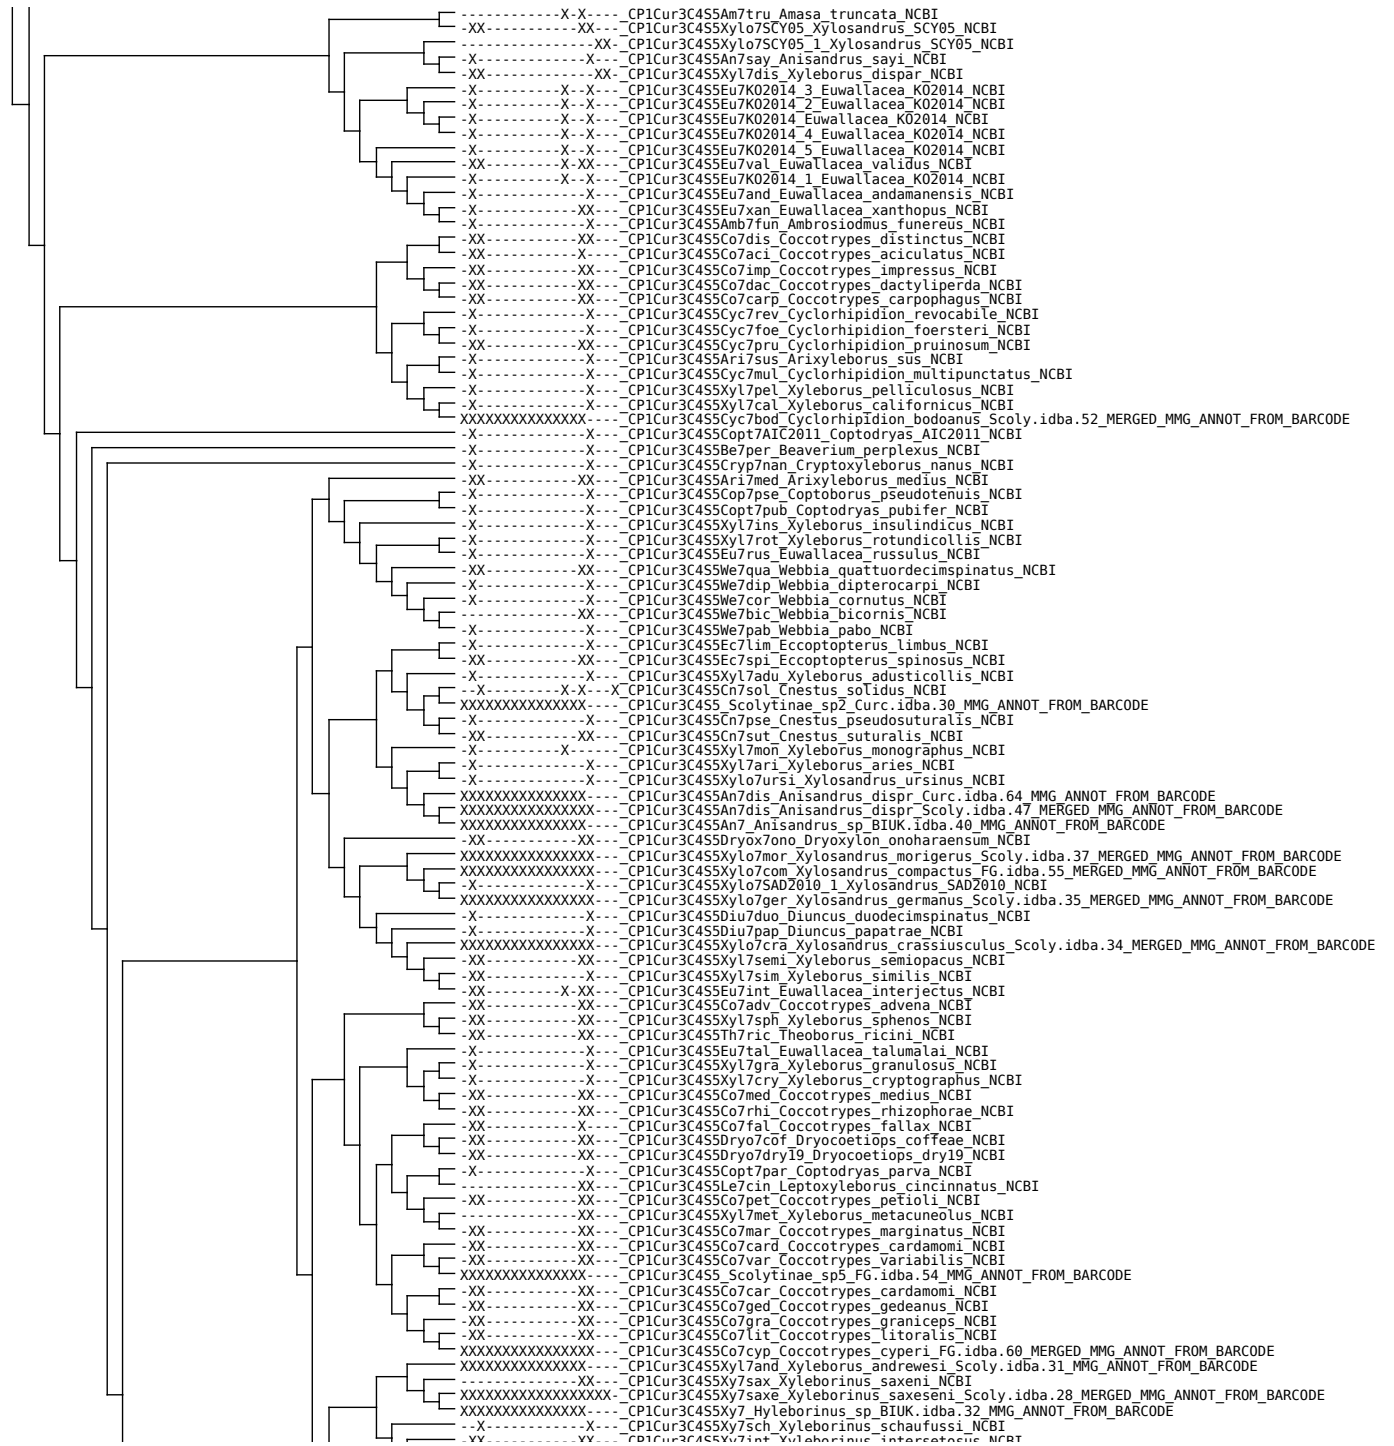

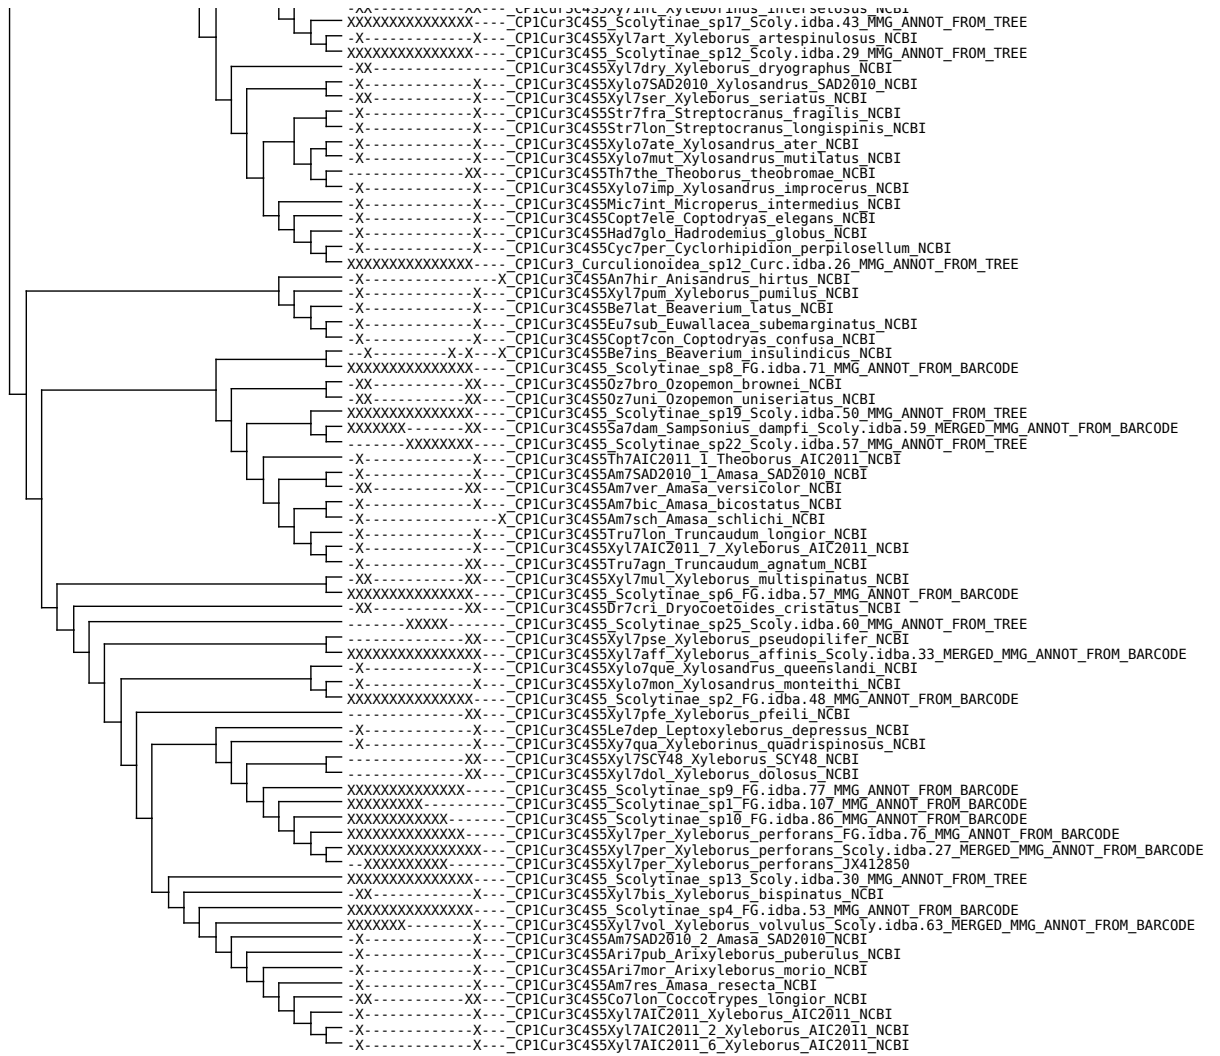

Supplement: Supplementary file [file 280792-3.pdf]
